1           **Epigenomics, Genomics, Resistome, Mobilome, Virulome and Evolutionary**  
2           **Phylogenomics of Carbapenem-resistant *Klebsiella pneumoniae* clinical strains**

3                           Katlego Kopotsa<sup>1</sup>, Nontombi M Mbelle<sup>1</sup>, Osei Sekyere John<sup>1#</sup>

4           <sup>1</sup>Department of Medical Microbiology, School of Medicine, Faculty of Health Sciences, University of Pretoria,  
5           0084 Pretoria, South Africa.

6           #Address correspondence to Dr. John Osei Sekyere, Department of Medical Microbiology, University  
7           of Pretoria, South Africa. Email: [jod14139@gmail.com](mailto:jod14139@gmail.com)

8           **Running Head:** Genomics of resistant *K. pneumoniae*

9           **Tweet:** Epigenomic and genomic factors influence the resistome, mobilome, virulence and epidemiology of *K.*  
10           *pneumoniae*. They harbour multiple resistance genes, insertion sequences, transposons, prophages and restriction  
11           modification systems on mobile plasmids, influencing their genomic plasticity and threatening antimicrobial and  
12           bacteriophage chemotherapy.

13           **Highlights/Importance**

14           *K. pneumoniae* is a major pathogen implicated in numerous nosocomial infections.  
15           Worryingly, we show that *K. pneumoniae* isolates from South Africa, Africa and globally are  
16           endowed with rich resistomes and mobilomes that make them almost pandrug resistant. The  
17           isolates in this study contained rich virulomes and prophages on both chromosomes and  
18           plasmids, with close evolutionary kith or kin to other plasmids identified worldwide. There  
19           was a rich diversity of restriction modification systems that regulate virulence, transcription,  
20           and plasmid mobility in bacteria, facilitating the epidemiology, resistance, pathogenicity and  
21           genomic evolution of the strains, and threatening antimicrobial and bacteriophage therapy.

22 **Abstract**

23 **Background:** Carbapenem-resistant *Klebsiella pneumoniae* (CRKP) remains a major clinical  
24 pathogen and public health threat with few therapeutic options. The mobilome, resistome,  
25 methylome, virulome and phylogeography of CRKP were characterised.

26 **Methods:** CRKP collected in 2018 were subjected to antimicrobial susceptibility testing,  
27 screening by multiplex-PCR, genotyping by Repetitive Element Palindromic-Polymerase  
28 Chain Reaction (REP-PCR), plasmid size, number, incompatibility, and mobility analyses,  
29 and PacBio's SMRT sequencing (n=6).

30 **Results & conclusion:** There were 56 multidrug-resistant CRKP, having *bla*<sub>OXA-48</sub>-like and  
31 *bla*<sub>NDM-1/7</sub> carbapenemases on self-transmissible IncF, A/C, IncL/M and IncX<sub>3</sub> plasmids  
32 endowed with prophages, *traT*, resistance islands and type I and II restriction modification  
33 systems (RMS). These plasmids were of close evolutionary relationship to several plasmids  
34 globally whilst the strains also clustered with several global clades, evincing transboundary  
35 horizontal and vertical dissemination. Reduced susceptibility to colistin occurred in 23 strains.  
36 Common clones included ST307, ST607, ST17, ST39, and ST3559. IncFII<sub>k</sub> virulent plasmid  
37 replicon was present in 56 strains. The six strains contained at least 41 virulence genes and  
38 four different K- and O-loci types: KL2, KL25, KL27, KL102, O1, O2, O4 and O5. Types I,  
39 II, and III RMS, conferring m6A (GATC, GATGNNNNNNTTG, CAANNNNNNNCATC  
40 motifs) and m4C (CCWGG) modifications on chromosomes and plasmids, were found.

41 There is plasmid-mediated, clonal, and multiclonal dissemination of *bla*<sub>OXA-48</sub>-like and  
42 *bla*<sub>NDM-1</sub> in South Africa, mirroring international epidemiology of similar clones and  
43 plasmids. Plasmid-mediated transmission of RMS, virulome and prophages influence  
44 bacterial evolution, epidemiology, pathogenicity, and resistance, threatening infection

45 treatment. RMS influence on antimicrobial and bacteriophage therapy needs urgent  
46 investigation.

47 **Keywords:** Restriction modification systems; DNA Methylation; Carbapenemase;  
48 Evolutionary epidemiology; resistance plasmids; virulence plasmids.

## 49 **Introduction**

50 *Klebsiella pneumoniae* is an encapsulated, non-motile, Gram-negative bacterium first isolated  
51 from the lung of a demised patient who was suffering from pneumonia in 1882 <sup>1</sup>. These  
52 bacteria are known to colonize human gastrointestinal (GI) tract and oropharynx mucosal  
53 surfaces <sup>2</sup>. To date, *K. pneumoniae* causes most nosocomial infections, accounting for 3% to  
54 8% of all reported nosocomial infections <sup>3</sup>. These infections are specifically a problem in the  
55 elderly, immunocompromised patients and neonates; but less frequently, *K. pneumoniae*  
56 infections such as sepsis and pneumonia are community-acquired <sup>4</sup>.

57 Antimicrobial resistance (AMR) in bacteria such as *K. pneumoniae* has become a major  
58 public health concern worldwide, fuelled by misuse and overuse of antibiotics, which  
59 increases the evolution of AMR genes (ARGs) and antimicrobial-resistant bacteria<sup>5</sup>.  
60 Resistance may be intrinsic i.e., acquired through mutations, and/or transferred horizontally  
61 from one bacterium to another through mobile genetic elements (MGEs) <sup>6</sup>. Among the various  
62 AMR mechanisms, acquired resistance through MGEs is most reported <sup>7</sup>. Acquisition of  
63 antimicrobial-inactivating enzymes and efflux pump systems are important in the  
64 development of multi-drug resistant (MDR) in Enterobacterales, including *K. pneumoniae* <sup>8,9</sup>,  
65 with the resistance-nodulation-division (RND) family of efflux pumps being responsible for  
66 ejecting charged and amphiphilic antimicrobials such as aminoglycosides,  $\beta$ -lactams and  
67 fluoroquinolones <sup>9,10</sup>. The use of  $\beta$ -lactams over the years has resulted in widespread

68 escalation of  $\beta$ -lactamases, including carbapenemase-producing *K. pneumoniae*<sup>11,12</sup>, resulting  
69 in increased treatment failure, morbidity, and mortality<sup>13</sup>.

70 Carbapenemases are categorised into three classes, class A (e.g. KPC, SME, IMI, and GES),  
71 class B (e.g. NDM, VIM, and IMP), and class D (OXA-48-like)<sup>14,15</sup>. Carbapenemases are  
72 capable of slightly and/or completely hydrolysing  $\beta$ -lactams, including “last resort”  
73 carbapenems<sup>16</sup>. Class B carbapenemases, particularly *bla*<sub>NDM</sub> genes, have been reported to be  
74 more potent than the other groups and cannot be inhibited by commercially available  $\beta$ -  
75 lactamase inhibitors such as clavulanic acid, tazobactam, or sulbactam<sup>17,18</sup>.

76 Mobile genetic elements such as plasmids, transposons, prophages and integrons play a major  
77 role in the acquisition and dissemination of antimicrobial resistance genes (ARGs) in  
78 carbapenem-resistant strains<sup>12,19–21</sup>. Among these are large conjugative plasmids that have  
79 been associated with horizontal gene transfer (HGT) of carbapenemases between and within  
80 Gram-negative bacteria<sup>7</sup>. These plasmids have been reported in *K. pneumoniae* strains and are  
81 associated with multiple replicon groups such as IncF, A/C, L/M, N, and X<sup>19</sup>. IncF replicon  
82 plasmids are the most predominant and are mainly reported to carry the *bla*<sub>KPC</sub> and *bla*<sub>NDM</sub>  
83 genes in the United States, Canada, Greece, South Africa and Taiwan<sup>12,19,22,23</sup>. Besides  
84 resistance, plasmids are being increasingly associated with the transmission of virulence  
85 factors, resulting in transmission of important pathogenic traits<sup>24–26</sup>. Recently, it is  
86 increasingly being realised that restriction modification systems (RMS), comprising of  
87 restriction endonucleases (REs) and DNA methylases (MTases), regulate virulence, plasmid  
88 mobilization, bacterial immunity, DNA repair, transcription, replication, regulation and  
89 resistance in bacteria<sup>27–31</sup>. These suggest the important role of the methylome in bacterial  
90 virulence, mobilome and resistome, which ultimately affect infectious diseases epidemiology.  
91 This study thus seeks to characterise these factors in this important pathogen.

## 92 **Results**

### 93 ***Clinical demographics and genome characteristics***

94 The *K. pneumoniae* isolates were isolated from aspirates (n = 4), blood cultures (n = 17),  
95 catheter tips (n = 7), swabs (n = 11), tissue (n = 3) and urine (n = 14) (Tables 1 & S1), and  
96 were submitted to the referral laboratory from six hospitals and centres including Kalafong  
97 hospital (n = 10), Mamelodi hospital (n = 1), Olievenhoutbosch clinic (n = 1), Steve Biko  
98 academic hospital (n = 36), Tembisa hospital (n = 5) and Tshwane rehabilitation centre (n =  
99 3). The study population consisted of males (58.9%) more than females (39.3%) and results  
100 were not available for one participant (Table S1).

### 101 ***Antibiogram-resistome associations***

102 Of the 60 *K. pneumoniae* with reduced susceptibility to carbapenems by VITEK®,  
103 carbapenem resistance could only be confirmed in 56 isolates by the MicroScan system  
104 (Table S1). The isolates were multidrug-resistant (MDR), with a substantial number being  
105 extensively drug resistant (e.g. KP51, KP27, KP 42 etc.); a few showed pandrug resistance  
106 phenomes (e.g. KP56) (Fig. 1A & 1Bi). Almost all isolates showed reduced susceptibility to  
107 ertapenem (98.2%), followed by imipenem (66.1%), doripenem (50%) and meropenem  
108 (48.2%). Reduced susceptibility to colistin was also observed in 23 (41.1%) isolates. Among  
109 all the tested antibiotics, the isolates were most susceptible to amikacin (82.1%), fosfomycin  
110 (82.1%), tigecycline (76.8%), and levofloxacin (60.7%) (Figure 1). The most prevalent  
111 carbapenemase detected by PCR was *bla*<sub>OXA-48</sub> (65%), followed by *bla*<sub>NDM-1</sub> (29%). No  
112 *bla*<sub>GES</sub>, *bla*<sub>KPC</sub>, *bla*<sub>IMP</sub> and/or *bla*<sub>VIM</sub> were detected (Fig. 1Bii).

113 *bla*<sub>OXA-48</sub>-containing isolates were mostly non-resistant to the carbapenems except to  
114 ertapenem in selected cases (e.g., KP44, KP40, KP39, KP2 etc.) and to the other carbapenems  
115 in a few cases (e.g., KP36, KP49, KP8, and KP55). Contrarily, all isolates harbouring *bla*<sub>NDM-1</sub>  
116 were all resistant to all the carbapenems. Further, isolates containing both *bla*<sub>OXA-48</sub> and

117 *bla*<sub>NDM-1</sub> genes (e.g. KP10 and KP56) were also resistant to all carbapenems except KP18,  
118 which was only resistant to ertapenem and intermediate resistant to the rest (Table S1 and Fig.  
119 1).

120 The resistome of the sequenced isolates were similar and mostly agreed with their respective  
121 antibiograms except for fosfomicin to which all the isolates were susceptible even though  
122 they all harboured the *fosA* gene. The six isolates carried *bla*<sub>OXA-181</sub> (n = 2), *bla*<sub>OXA-48</sub> (n = 1),  
123 *bla*<sub>NDM-1</sub> (n = 2), and *bla*<sub>NDM-7</sub> (n =1) alongside other resistance determinants causing  
124 resistance to aminoglycosides (except amikacin)[*aac(3)-IIa*, *aac(6')-Ib-cr*, *aadA16*, *aph(3')-*  
125 *Ib*, *aph(6)-IId*, *rmtC*], quinolones [*aac(6')-Ib-cr*, *oqxA*, *oqxB*, *qnrB1*, *qnrS1*], β-lactams  
126 (*bla*<sub>OXA-1</sub>, *bla*<sub>CTX-M-15</sub>, *bla*<sub>SHV</sub>, *bla*<sub>TEM-1B</sub>), tetracycline (*tetA*), sulphonamides (*sul1*, *sul2*),  
127 trimethoprim (*dfrA14/27*), phenicol (*catB3/ catA2*), and fosfomicin (*fosA/A7*). KP29 had no  
128 *tet(A)* but was resistant to the tetracyclines; *bla*<sub>SCO-1</sub> was found in only this isolate. The 16S  
129 rRNA methyltransferase, *rmtC*, was found in only KP10 and KP33; yet, KP33 was  
130 susceptible to amikacin while KP10 was resistant. Chromosomal mutations in *parC* (S104I)  
131 and *gyrA* (S83I), conferring high-level fluoroquinolone MICs, were only seen in KP8.  
132 Nevertheless, the other isolates, which had no mutations, were also resistant to the  
133 fluoroquinolones (KP29 was susceptible to ciprofloxacin and levofloxacin) (Table S1 &  
134 Supplemental data 2).

135 Mobile colistin resistance determinants, *mcr-1* to *-10*, were not identified. although colistin  
136 resistance was recorded in three isolates. Particularly, KP10 was susceptible to colistin, had  
137 no *ccrB* gene and had M66I mutation in *pmrA* whilst KP15, which was also susceptible to  
138 colistin, also had no mutations in *pmrAB*, *phoQP*, *mgrB* and *kpnEF*, and had no *ccrB*.  
139 Although KP29 had mutations in *ccrB* (D189E), *kpnE* (K112Q) and *pmrA* (E57G), it was also  
140 susceptible. *OqxAB*, *fosA* and *bla*<sub>SHV</sub> were all found on the chromosomes (Supplemental data  
141 2).

142 ***REP-PCR phylogenetics***

143 The Repetitive extragenic palindromic (REP) – PCR dendrogram showed seven main clusters,  
144 with little or no similarities in the antibiogram, resistome or mobilome of isolates in the same  
145 clusters (Fig. 1); i.e., they were not clonally specific. Notwithstanding, isolates from the same  
146 hospital/ward had much similar antibiograms, resistomes and mobilomes (Fig. 1 & Table S1).  
147 The six sequenced isolates were collected from three different hospitals. Four isolates were  
148 from the same hospital but different wards and collection sites including ward 4, urine  
149 (Kp10); vascular surgery ward 4, catheter tip (Kp15); neurology ward, swab (Kp29); and  
150 high-care multidiscipline ward, urine (Kp33) (Table S1). Five different sequence types (STs)  
151 were identified among the isolates including ST39, ST307, ST607, ST17, and ST3559.  
152 Isolates Kp10 and Kp33, carrying *bla*<sub>NDM-1</sub>, both belonged to sequence type-39 (ST39),  
153 although they clustered differently on the dendrogram.

154 ***Mobilome***

155 Plasmid characterization by gel electrophoresis revealed that most isolates (n = 17) carried  
156 four plasmids, followed by 16 isolates with two plasmids, 15 isolates with three plasmids, five  
157 isolates with five plasmids, and three isolates with only one plasmid. Plasmids sizes ranged  
158 from 1.4-kb to >48.5-kb (Fig. 1; Table S1). Eleven plasmid replicon groups were identified in  
159 all the isolates (n=56), which were all positive for IncFII<sub>k</sub> (virulent plasmid). Majority of the  
160 isolates were positive for IncF (FII, FIB, FIC, FIB), IncL, A/C, and IncM plasmids, while  
161 only a few isolates were positive for IncHI1 and IncHI2 (Fig. 1B; Table S1). Multi-replicons  
162 were reported in 75% (n = 42) of the tested isolates. Two isolates showed the highest multi-  
163 replicon combination: one *bla*<sub>OXA-48</sub>-producer and one *bla*<sub>NDM-1</sub>-producer had six and seven  
164 replicon groups, respectively (Figure 5).

165 Conjugation experiments were successful on 20 out of the 26 meropenem-resistant *K.*  
166 *pneumoniae* isolates; 20 donor strains transferred their plasmids to *E. coli* J53-A<sup>r</sup> strain.  
167 Among the 20 transferred plasmids, 16 were positive for the *bla*<sub>NDM-1</sub> gene, followed by three  
168 *bla*<sub>OXA-48</sub> and one isolate with both *bla*<sub>NDM-1</sub> and *bla*<sub>OXA-48</sub> genes (Fig. 1B). Sequencing  
169 analyses of six isolates showed that five had two major plasmids whilst KP29 had three,  
170 which were different from the numbers obtained from the gel electrophoresis analyses, except  
171 for KP8 (Fig. 1-6; Table S1); fragments (contigs) of these plasmids were found but had no  
172 replicon genes (Table S1). The sizes obtained from the sequencing analyses were also  
173 different from that obtained from the gel electrophoresis analyses: KP8 [pKP8.6\_CTX-M-15  
174 (198, 548bp) and pKP8.12\_OXA181 (51, 479bp)]; KP10 [pKP10.8\_NDM-1 (101,574bp) and  
175 pKP10.4\_OSEI (181, 384bp)]; KP15 [pKP15.4\_KATLEGO (311, 287bp) and  
176 pKP15.12\_OXA-181 (153, 467bp)]; KP29 [pKP29.8\_CTXM-15 (237, 044bp),  
177 pKP29.11\_NDM-7 (45, 184bp) and pK29.13\_MBELLE (83, 675bp)]; KP32 [pKP32.5\_OXA-  
178 48 (85, 104bp) and pKP32.3\_CTXM-15 (247, 163bp)]; and KP33 [pKP33.8\_NDM-1  
179 (101,574bp) and pKP33.4\_OSEI (181, 384bp)] (Fig. 2-6 & S1-S6).

180 Three of these plasmids viz., pKP32.5\_OXA-48, pKP29.9\_CTXM-15, and  
181 pK29.13\_MBELLE, had overlapping ends, making them completely circularised whilst the  
182 remaining were partial with no overlapping ends (Fig. 2-6). *Bla*<sub>NDM-1</sub> was present on  
183 pKP10.8\_NDM-1 (IncFII<sub>(yp)</sub>) and pKP33.8\_NDM-1 (IncFII<sub>(yp)</sub>) alongside *ble*, *rmtC*, *sull* and  
184 cytosine MTase within *IS1/5/3* and *ISKpn26* ISs (insertion sequences) (Fig. 3 & S6.1).  
185 *Bla*<sub>NDM-7</sub> was found on pKP29.11\_NDM-7 (IncX<sub>3</sub>) alongside *ble* within *IS5*, *IS26*, *ISKox3* and  
186 a resolvase (Fig. 5). *Bla*<sub>OXA-181</sub>, alongside *ereA* and *QnrS1*, was found on pKP8.12\_OXA181  
187 (ColKP3 and IncX<sub>3</sub>) within composite *Tn3*-like transposons and *IS26*, *ISKpn19* and *ISKox3*  
188 ISs; *bla*<sub>OXA-181</sub> was also found on pKP15.12\_OXA-181 (IncU, IncC and colKP3) with *ereA*,  
189 *QnrS1*, *aac(6')-Ib3*, *mph(A)*, *tet(A)*, *aph(3'')-Ib*, *aph(6)-Id*, *sul2*, and adenine and cytosine



190 MTases bracketed by *Tn3* composite transposons, *IS26*, *IS3000*, *IS6100*, and *IntI1* class 1  
191 integron (Fig. 2 & 4). *Bla<sub>OXA-48</sub>* was found on pKP32.5\_OXA-48 (IncL) alone within *IS10A*,  
192 *IS1* and *IS4* ISs (Fig. 6).

193 *Bla<sub>CTX-M-15</sub>* (bracketed by *ISEc9*, *Tn3* transposon, *IS1* and *IS26*) and *bla<sub>TEM-1B</sub>* (bracketed by a  
194 recombinase/integrase, *IS91*, *aph(6)-Ia*, *aph(3'')-Ib*, *sul2*, *IS5075*, *IS5*, *IS91*) were found in  
195 close synteny on the same plasmids in all the isolates; *bla<sub>TEM-1B</sub>* genetic environment only  
196 differed slightly in pKP29.8\_CTXM-15 (Fig. S1-S6). Adenine and cytosine MTases were also  
197 found the same plasmids as *bla<sub>CTX-M-15</sub>* and *bla<sub>TEM-1B</sub>*, within ISs and transposons. *Bla<sub>OXA-1</sub>*  
198 (with *aac(3)-IIa*, *catB3*, *aac(6')-Ib-cr5*, *IS26*, *TnAs1*, a relaxase, *tet(A-R)* and *Tn3*) and  
199 *bla<sub>SCO-1</sub>* (found within ISs, MTase, and a recombinase on pKP29.8\_CTXM-15) were only  
200 found on four and one plasmids respectively; notably, *bla<sub>OXA-1</sub>* and its rich genetic  
201 environment of resistance genes and ISs were on the sample plasmids as *bla<sub>CTX-M-15</sub>* and  
202 *bla<sub>TEM-1B</sub>*, albeit quite distant from the latter, forming a resistance island. Thus, *bla<sub>CTX-M-15</sub>* and  
203 *bla<sub>TEM-1B</sub>* formed a genomic resistance island with their immediate genetic environment of  
204 rich ISs and transposons just as *bla<sub>OXA-1</sub>*. Furthermore, other antibiotic (*dfrA14*, *QnrB*, *aadA*,  
205 *aac(6')-Ib-cr5*, *arr-3*, *catA*, *qacEΔ1*, *sul1* ) and mercury (*merABCDETPR*) resistance genes,  
206 *tolA* efflux pump, NH<sub>2</sub> restriction endonucleases and MTases were also found on ISs,  
207 transposons and mainly, on *IntI1* class 1 integrons (Fig. S1-S6).

208 Complete and partial prophage DNA were identified on both chromosomes and plasmids,  
209 including the *Klebsi\_phiKO2*, *Cronob\_ENT47670*, *Edward\_GF\_2*, *Pectob\_ZF40*,  
210 *Phage\_Gifsy*, and different variants of *Salmon* (6), *Entero* (2), *Escher* (3) (Supplemental data  
211 3 and Fig. S7-S11). Complete and incomplete prophages were found in the plasmids of all the  
212 isolates. KP15 alone had four complete prophages on two plasmids (pKP15.4\_KATLEGO  
213 and pKP15.12\_OXA-181) whilst the single complete prophages were found on single  
214 plasmids in the other isolates. Furthermore, complete and incomplete prophages were also

215 found on chromosomes in these isolates (Fig. S7-S11). The same prophages were also found  
216 in different isolates (Supplemental data 3).

### 217 *Plasmid evolutionary epidemiology*

218 A phylogenetic analysis of the plasmids obtained in this study, shows that some of these  
219 plasmids, which belonged to different replicon groups and harboured different ARGs from  
220 different isolates, were evolutionary closer to each other (Fig. 7). For instance,  
221 pKP32.3\_CTXM-15 and pKP8.6\_CTX-M-15 were of different sizes and from different  
222 isolates, but had similar ARGs and replicon types (IncFII(K) and IncFIB(K)) clustered  
223 together on the same branch. The same observation was made for pKP10.8\_NDM-1 and  
224 pKP33.8\_NDM-1 as well as for pKP10.4\_OSEI and pKP33.4\_OSEI, which harboured the  
225 same ARGs and replicon types in two different isolates of the same clone (ST39). Contrarily,  
226 IncX<sub>3</sub> *bla*<sub>NDM-7</sub>-bearing pKP29.11\_NDM-7 plasmid clustered closely with pKP29.9\_CTXM-  
227 15, an IncFIB(K) and IncFII(K) plasmid, albeit all were from the same isolate. Nevertheless,  
228 pKP15.4\_KATLEGO and pK29.13\_MBELLE, which had IncR and IncFIA(HI1) replicons,  
229 clustered separately. IncX<sub>3</sub>-ColKP3 pKP8.12\_OXA181plasmid was distant from all the other  
230 plasmids (Fig. 7). Mauve alignment of these plasmids with other closely related plasmids  
231 from GenBank showed similarities in sequence identity and synteny as well as sequence  
232 rearrangements (Fig. S1-S6).

233 Nucleotide BLAST analyses and comparative genomics of the carbapenemase-bearing  
234 plasmid genomes from this study, identified highly similar plasmids with the same replicon  
235 types, ARGs and host bacterial species from different countries globally; in a few cases, the  
236 replicon types and ARGs differed slightly, albeit the country and bacterial species differed  
237 substantially (Fig. 7 & S13; Table S2). In most cases, the plasmids from this study aligned  
238 most closely viz., more than 90% nucleotide sequence identity and coverage, with plasmids  
239 deposited on Genbank, which were from different countries (Table S2; Fig. S13). For

240 instance, pKP8.12\_OXA181, a multi-replicon plasmid, was closely aligned with 201 other  
241 plasmids of the same or similar replicon group (IncX/ColKP3) from different countries and  
242 bacterial hosts but having *bla*<sub>OXA-181</sub> or *bla*<sub>NDM</sub>. Similarly, pKP10.8\_NDM-1 was closely  
243 aligned to 31 other plasmids of the same replicon with *bla*<sub>NDM</sub> from the USA, Canada, China,  
244 New Zealand, and Europe. Similar trends were also observed for pKP15.12\_OXA-181  
245 (aligned to 33 other IncC/U and ColKP3 plasmids of the same replicons from the US, China,  
246 Europe, and Vietnam, although they contained few carbapenemases), pKP29.11\_NDM-7  
247 (aligned to 231 other IncX<sub>3</sub> plasmids worldwide that harboured *bla*<sub>OXA-181</sub>, *bla*<sub>KPC</sub> or *bla*<sub>NDM</sub>)  
248 and pKP32.5\_OXA-48 (aligned with 59 other IncL plasmids worldwide that also harboured  
249 *bla*<sub>OXA-48</sub>). Notably, IncX<sub>3</sub> plasmids harboured NDM whilst IncX<sub>3</sub>-ColKP3 plasmids  
250 harboured OXA-181 (Fig. S13).

251 Resistome analyses of the various plasmids show that IncF, IncN, A/C, ColRNAI/KP3, and  
252 IncH had more diverse ARGs repertoire compared to IncX, IncL, IncR and IncI (Fig. 7).  
253 *bla*<sub>NDM</sub>, *bla*<sub>KPC</sub>, *bla*<sub>TEM</sub> *aac(6')-Ib*, *aac(3)-II*, *aadA*, *dfrA*, *sul*, *qnrB/S*, and *rmtB/C* were  
254 commonly found on all the replicon types except IncX; however, *bla*<sub>NDM</sub>, *bla*<sub>KPC</sub> and *bla*<sub>SHV</sub>  
255 were common on IncX plasmids. Indeed, *bla*<sub>NDM</sub> was more concentrated on IncX and A/C  
256 plasmids than other plasmid types. A phylogenetic analysis of these plasmids could not be  
257 undertaken due to their inability to align substantially. Notably, most of these plasmids have  
258 been reported from the USA, Europe and South-East Asia, with few being reported from  
259 South America, Africa and Australia; South Africa and Brazil reported more plasmid replicon  
260 groups in Africa and South America respectively (Fig. 7 & S13).

## 261 ***Virulome***

262 A total of 51 virulence genes were found in the chromosomes of the six genomes, with *ccI*  
263 and *traT* being found on plasmids. KP8 and KP32 had the least set of virulence genes (n=40)  
264 whilst the other isolates had all 51 genes. Hypervirulent genes were absent in all the genomes

265 (Table S3; Fig. S14.1-2). The capsule polysaccharide-based serotyping or the K-loci results  
266 showed four different serotypes among the sequenced isolates: KL2 (KP10 and KP33), KL25  
267 (KP15 and KP29), KL27 (KP32) and KL102 (KP8). As well, the O-loci results also showed  
268 four O serotypes: O1v1 (KP10, KP33, and KP15), O2v2 (KP8), O4 (KP32), and O5 (KP29).  
269 As shown in Fig. S14.3-8, the K- and O-serotyping was not only clone-specific as different  
270 clones shared the same K and O serotypes.

### 271 *Methylome*

272 Types I, II and III MTases were found in the isolates, with type II MTases being the most  
273 abundant followed by type I MTases; a single type III MTase (M.Kpn214ORFGP or  
274 M.Kpn30104ORFBP) was found chromosomally on all isolates with no known motif. As  
275 well, no motif was identified for the type I RMS in all the isolates and except for KP15 and  
276 KP29, all the type I RMS were found on chromosomes. A complete RMS consisting of REs,  
277 MTases and a specificity subunit, representing the *hsd*RMS operon, were only found on either  
278 chromosomes or plasmids (KP15 and KP29) of all but KP32 and KP33; the position of these  
279 RMS components on the chromosomes or plasmids show that they were in very close or  
280 overlapping synteny. KP32 had only type I REs with no MTases whilst KP33 had no  
281 specificity subunit. Except for KP10 and KP33, all the other isolates had very unique type I  
282 RMS, with R2.KpnLAUORFGP (found on only chromosomes) being the sole common RE in  
283 all isolates. Furthermore, the type I REs on the chromosomes of KP15 and KP29 were  
284 different from that on the plasmids. Notably, all the isolates had only single type I MTases on  
285 either plasmids or chromosomes except KP8, which had two. There were mutations observed  
286 in the type I REs (Table S4).

287 Type II RMS adenine (Dam) and cytosine (Dcm) MTases, which respectively binds to and  
288 methylate GATC (all isolates), GATGNNNNNCTG/CAANNNNNNNCATC (KP29 only) and  
289 CCWGG or CCNGG (all isolates) were identified. Nevertheless, type II MTases with no

290 known motifs were also identified. Noteworthy, all Dams (with GATC motifs) were only  
291 found on chromosomes in all isolates whilst most Dcms (with CCWGG or CCNGG motifs)  
292 were mainly found on plasmids with a few exceptions: KP8 (*M.Kpn10PVDcmP*), KP10 and  
293 KP33 (*M.Kpn0718ORF12365P* and *M.Sfl2ORFAP*), KP15 (*M.Kpn3210ORFFP*), and KP29  
294 (*M.KpnLAUORFBP* and *M.Kpn3210ORFFP*) and KP32 (*M.Kpn3210ORFFP*,  
295 *M.KpnNIH30Dcm* and *M.Sfl2ORFAP*) had few chromosomal Dcms. As well, all the type II  
296 REs were on plasmids and were not more than two per isolate compared to several unique  
297 MTases on either plasmids or chromosomes. The absence of REs on the chromosomes makes  
298 many of these Dcms orphans with no known motifs (Table S4). An interesting observation  
299 was the multiple copies of *M.Sfl2ORFAP* on both plasmids and chromosomes in single strains  
300 as well as its common presence in all the strains. No CCWGG motif was found by  
301 MotifMaker and GATGNNNNNCTG/CAANNNNNNNCATC was only identified by  
302 MotifMaker but absent from REBASE. Notably, the type II RE and MTases on either  
303 plasmids or chromosomes shared the same CCWGG motif (Table S4).

304 All isolates, including both KP15 and KP29, had mostly m6A modifications (methylated  
305 adenines) i.e. resulted in N6-methyladenine (<sup>6m</sup>A); more than 92% of GATC and 84% of  
306 GATGNNNNNCTG motifs were found in KP15 and KP29, respectively. Moreover, m4C  
307 modification types (methylated cytosines) i.e., resulted in N4-methylcytosine (<sup>4m</sup>C), were also  
308 seen in all the isolates, albeit fewer than 6mA modifications (Table S4). Analyses of all the *K.*  
309 *pneumoniae* genomes (from Africa and globally) used in this study showed a higher  
310 prevalence of Dams than Dcms in their genomes (data not shown).

### 311 ***Global phylogenomics, phylogeography and resistome***

312 The genomes of the six isolates ranged from 5.6-5.9Mb, with five to 13 contigs, a GC content  
313 of 57 and coding sequences ranging from 5461 to 5629. The N50s varied widely between the  
314 isolates although the L50 was only between one and two (Table S1 & S5).

315 The six isolates belonged to five different clones that clustered differently, with KP10 and  
316 KP33 falling within ST39 (Fig. 8A). The isolates also clustered with other *K. pneumoniae*  
317 isolates from Durban, Ozwatini, Pretoria, and Pietermaritzburg (clades II, VI, VIII, IX and  
318 XII) out of 82 isolates and 13 clades. Same clones/clades were seen circulating within and  
319 between Pretoria (Gauteng Province), Ozwatini, Pietermaritzburg, and Durban (KwaZulu-  
320 Natal Province). The evolutionary trajectory of the strains, as shown on the tree (Fig. 8B),  
321 depicts that some of the clades emerged from other clades or from a common ancestor: for  
322 instance, clades IV and V share the same ancestor as clade III, albeit clades IV and V were  
323 mainly of ST152. Evidently, ST14 and ST15 as well as ST983 and ST17 were of very close  
324 evolutionary distance (Fig. 8B). *K. pneumoniae* ST101 is the most prevalent clone in South  
325 Africa, followed by ST152; ST101 was most prevalent in Durban, followed by Pretoria.  
326 Notably, all the *K. pneumoniae* strains from South Africa had multiple ARGs, with ST101  
327 and ST152 having the most abundant and diverse repertoire of ARGs, including NDM, GES-5  
328 and CTX-M-15 (Fig. 8C; Tables S5-S6).

329 Genomes of *K. pneumoniae* isolates from Africa were mainly obtained from Algeria,  
330 Cameroon, Egypt, Ghana, Guinea, Malawi, Nigeria, Niger, South Africa, Sudan, Tanzania,  
331 Togo, Tunisia, and Uganda. These clustered in 17 clades and were not restricted to a single  
332 country except clades II, VIII, X, XIII and XVI, showing the distribution of same clades  
333 across several African countries. ST101, which clustered into two clades, was the commonest  
334 clone in Africa (South Africa, Egypt, Tunisia, and Ghana) whilst ST152 was also common,  
335 but was mainly found in South Africa (Fig 9). Individual clones were mostly found on the  
336 same branches, albeit different clones were also found on within the same clade; particularly,  
337 ST716 and ST1552 as well as ST25, ST307 and ST152 clustered on the same branches  
338 despite their different clonalities. Multiple ARGs were present in the genomes of all these *K.*

339 *pneumoniae* genomes from Africa; notwithstanding, genes encoding NDM, GES-5, and  
340 OXA-48 were only found in a few clades viz., IX, X, XII, XVII (Fig. 9).

341 Globally, *K. pneumoniae* strains producing carbapenemases clustered into 15 main clades,  
342 with intercountry transmission being identified in most clades. Italy had numerous ST101,  
343 ST2502 and ST512 clones suggestive of local outbreaks. Vietnam had substantial ST15  
344 clones whilst South Africa had ST101 and ST152 clones, suggestive of local clonal  
345 transmissions. Worryingly, multiple resistance determinants were seen in all clades (Fig. 10;  
346 Table S6).

### 347 **3.4 Discussion**

348 *K. pneumoniae* is becoming a common cause of fatal and untreatable nosocomial infections  
349 worldwide with perennial local outbreaks. Herein, we comprehensively characterised the  
350 genomic and epigenomic determinants mediating MDR, virulence and evolutionary  
351 epidemiology of this species. We show that *K. pneumoniae* strains circulating in South Africa,  
352 Africa and globally are bearers of multiple resistance and virulence determinants through  
353 clonal, multiclonal and plasmid-mediated dissemination. We also identified and characterised  
354 plasmids, transposons, integrons and ISs mobilising ARGs, virulence genes and RMS within  
355 and between *K. pneumoniae* strains, evinced by a global plasmid evolution and resistome  
356 analyses that showed the global distribution of similar plasmid types. More revealing is the  
357 RMS and methylation signatures in these strains, which play a crucial role in their virulence,  
358 transposition, transcription, replication, DNA repair and resistance regulation<sup>28,29,31</sup>.

359 A striking but worrying feature of the isolates used in this study is their MDR phenomes,  
360 including resistance to last resort antibiotics such as colistin and carbapenems, and their  
361 widespread distribution in six major healthcare centres in Pretoria (Tshwane municipality)  
362 (Table S1). Indeed, the precarious nature of this situation is evinced by the recent outbreaks of

363 carbapenem-resistant *K. pneumoniae* in hospitals in Pretoria and Johannesburg that took the  
364 lives of several infants<sup>32,33</sup>. Priorly, other studies already reported of such fatal outbreaks in  
365 other public and private sector hospitals in other provinces in South Africa<sup>12,22,34</sup>, making this  
366 a national more than a local problem necessitating urgent public health interventions to stem  
367 this menace in the bud<sup>35</sup>.

368 Herein, the CRKP isolates mainly harboured *bla*<sub>OXA-48</sub> and *bla*<sub>NDM-1</sub>, which differs from a  
369 South African report by the National institute for communicable diseases (NICD) in 2015 in  
370 which a high prevalence of *bla*<sub>NDM-1</sub>-producing *K. pneumoniae* in the Gauteng and Kwazulu-  
371 Natal provinces and a few reports of *bla*<sub>OXA-48</sub>-producing *K. pneumoniae* in Gauteng and  
372 Eastern Cape provinces were described<sup>36</sup>. Similar results were also reported in 2016 by  
373 Perovic and colleagues, where a high prevalence of *bla*<sub>NDM-1</sub> was observed in the Gauteng  
374 province<sup>37</sup>. However, a recent study (2019) reported on an exponential increase in *bla*<sub>OXA-48</sub>-  
375 like producing *K. pneumoniae* strains<sup>38</sup>, which agrees with this study and suggests a change in  
376 carbapenem resistance determinants in *K. pneumoniae* in Gauteng. Evidently, NDM-positive  
377 strains had higher carbapenem resistance than OXA-48/181 strains (Table S1), which further  
378 agrees with previous reports that OXA-48-like enzymes are less hydrolytic than NDM ones<sup>19</sup>.  
379 Although isolates with both carbapenemases were also highly resistant, they did not have a  
380 higher MIC than those with only NDM (Table S1), which could be due to the lower  
381 hydrolytic ability of OXA-48-like enzymes. The absence of *mcr* in the isolates suggest  
382 chromosomal mutations-mediated colistin resistance.

383 The REP-PCR, albeit of a poorer resolution than whole-genome-based typing, revealed a  
384 major strain that was reported in majority of the *K. pneumoniae* isolates in this study, mainly  
385 carrying the *bla*<sub>OXA-48</sub> gene. One of the isolates in this group was sequenced and we identified  
386 *bla*<sub>OXA-181</sub> and ST307, which has been associated with hospital outbreaks and multiple ARGs  
387 such as *bla*<sub>CTX-M-15</sub>, *bla*<sub>NDM-1</sub>, *bla*<sub>KPC</sub>, *bla*<sub>OXA-48</sub>, and *mcr-1* genes<sup>39-43</sup>. In South Africa, OXA-



388 181-producing *K. pneumoniae* ST307 isolates were reported previously in the private sector  
389 hospitals in six provinces, including Gauteng<sup>38</sup>. In this study, the *K. pneumoniae* ST307  
390 isolates were collected from government sector hospitals in the Tshwane area.

391 Another strain detected by REP-PCR was found to contain *bla*<sub>OXA-181</sub> and belonged to ST607,  
392 a rare clone reported in China and in a neonatal ICU in France<sup>44</sup>. The *bla*<sub>OXA-48</sub>-producing *K.*  
393 *pneumoniae* strain, ST3559, has been recently reported as a novel clone among CRKP isolates  
394 collected from hospital wastewater, influent wastewater, river water, and riverbed sediments  
395 in South Africa<sup>45</sup>. These *K. pneumoniae* isolates shared the same molecular and MDR  
396 characteristics with isolates from this present study (Data S2), suggesting that the same strain  
397 is now circulating in hospitals in the Tshwane area. *Bla*<sub>NDM-7</sub>, the first to be found in *K.*  
398 *pneumoniae* ST17 in S. Africa, was reported in *K. pneumoniae* ST147 and ST273 involved in  
399 nosocomial cases in Canada, Gabon, Philippines, US and India<sup>46-50</sup>.

400 Moreover, the phylogeography and resistome analyses of *K. pneumoniae* genomes from South  
401 Africa, Africa, and global carbapenemase-producing *K. pneumoniae* (CPKP) strains shows  
402 the rich resistance repertoire of this species. Notably, similar *K. pneumoniae* clones are  
403 circulating within mainly Gauteng (Pretoria) and Kwazulu-Natal (Durban, Pietermaritzburg  
404 and Ozwatini) provinces in South Africa (Fig. 8), suggesting the exchange of carriers of these  
405 strains between these distant provinces. Indeed, other non-human factors could be involved in  
406 this interprovincial transmission and the earlier these carriers are identified the better.  
407 Furthermore, the presence of same clades/clones, particularly ST101, ST14, ST15 and ST17  
408 between South Africa, West Africa, and North Africa, bearing multiple clinically important  
409 ARGs is revealing. Globally, CPKP is mainly concentrated in the US, South Africa, Europe  
410 and South-East Asia, with relatively fewer reports from the Arabian peninsula and Brazil, a  
411 further evidence that AMR transcends borders and requires epidemiological investigations to  
412 detect and break the transmission chain.

413 Worryingly, almost all these *K. pneumoniae* and CPKP isolates co-harboured numerous other  
414 ARGs, which makes them potentially multi-, extensively and pan-drug resistant, an  
415 observation already made in this (Fig. 1 & Table S1) and other studies<sup>12,22</sup>. Hence, the  
416 administration of non-carbapenem antibiotics has a higher chance for selecting CRKP  
417 (carbapenem-resistant *K. pneumoniae*) and CPKP strains due to their rich resistome  
418 repertoire. It is thus not surprising that most *K. pneumoniae* infections are less responsive to  
419 treatment and have easily spread worldwide<sup>51</sup>. Coupled with this is the rich virulence genes  
420 and capsule repertoire of *K. pneumoniae* that enable them to escape host immune forces<sup>52</sup>. As  
421 shown previously, the virulome was not affected by the isolation source<sup>12</sup>. Worryingly, *traT*  
422 genes, encoding an outer membrane protein that resists complement proteins, were found on  
423 plasmids in all the isolates (Table S3). Gordon et al. (2020) recently found O1 and O2 capsule  
424 serotypes, also found in this study, to be most associated with MDR; they also found the K2  
425 serotype, present in KP10 and KP33, to be most common among global *K. pneumoniae*  
426 isolates<sup>52</sup>.

427 Almost 79 capsule polysaccharide types based on the K-loci of *K. pneumoniae* have been  
428 described, and of these, only K1 and K2 serotypes are associated with hypervirulent strains  
429 whilst the others are associated with classical strains of *K. pneumoniae*<sup>53,54</sup>. Our results  
430 showed that two of the sequenced isolates (Kp10 and Kp33), which are highly resistant to  
431 carbapenems and harboured the *bla*<sub>NDM-1</sub> gene, were K2 serotypes. This might indicate that  
432 these isolates are K2-hypervirulent *K. pneumoniae* (K2-hvKP) strains. K2-hvKP strains were  
433 not given attention until the report of multidrug-resistant K2-hvKP strain harbouring the  
434 *bla*<sub>KPC-2</sub> and *bla*<sub>IMP-4</sub> in China<sup>55</sup>. Following this report, multiple studies, including this study,  
435 have reported on carbapenemase production in highly virulent strains of the K2 serotype<sup>56,57</sup>.  
436 Another study in China reported on an ST11 *bla*<sub>KPC-2</sub>-producing strain (CR-HvKP1), which is

437 closely related to strains in this study (Supplemental data 2); this CR-HvKP1 harboured a  
438 virulence plasmid (pLVPK-like) and showed a highly resistant profile<sup>58</sup>.

439 The plasmid evolutionary epidemiology of the plasmids identified in this study, as well as  
440 their resistomes, provide deeper insights into the role of plasmids in the dissemination ARGs  
441 in Enterobacterales. Notably, the close evolutionary alignment/distance of plasmids bearing  
442 same or different ARGs, but belonging to different incompatibilities in the same isolate (Fig.  
443 7a), depicts the genetic exchanges (recombinations and rearrangements) that occur between  
444 plasmids and between plasmids and chromosomes during replication<sup>59,60</sup>. Evidently, the very  
445 close sequence and resistome similarity between this study's plasmids and those obtained  
446 from different and same species in other studies worldwide portrays the global dissemination  
447 of IncF, IncX, A/C, IncN, and IncI plasmids and their role in ARGs dissemination among  
448 bacteria. Furthermore, it shows that not all plasmid types harbour rich resistomes as IncX was  
449 mainly limited to only three ARGs. The relatively lower diversity and abundance of ARGs on  
450 these plasmids (Fig. 7) than the resistomes observed in the *K. pneumoniae* strains (Fig. 8-10)  
451 is because the *K. pneumoniae* strains contain multiple plasmids alongside chromosomes,  
452 which bear additional ARGs.

453 Previous studies identified *bla*<sub>NDM-1</sub> on IncF, IncL/M, IncN, A/C, and IncX plasmids<sup>19</sup>.  
454 Herein, *bla*<sub>NDM-1</sub>-producing *K. pneumoniae* were mostly associated with IncF (FII, F, FIB,  
455 FIC), followed by IncL and A/C plasmid replicons (Table S1), which agree with reports in  
456 Nepal, Taiwan, Oman, Myanmar, Canada and South Africa<sup>22,61-63</sup>. However, in China, Gabon,  
457 India, and Japan, NDM-1/7-variants in *K. pneumoniae* were on IncX<sub>3/4</sub> plasmids<sup>57,64</sup>. The  
458 *bla*<sub>OXA-181</sub>-producing isolates were on ColKP3, IncX<sub>3</sub>, and IncF plasmids, similar to previous  
459 studies from Czech Republic, Denmark, Sao Tome & Principe, and South Africa<sup>38,65-67</sup>. In  
460 South Africa, IncX<sub>3</sub> was found in *K. pneumoniae* collected during a hospital outbreak<sup>38</sup>. An  
461 earlier study reported the significant role that IncL/M plasmids play in the dissemination of

462 *bla*<sub>OXA-48</sub> genes in *K. pneumoniae* strains worldwide<sup>67-72</sup>. Our findings also prove that *bla*<sub>OXA-</sub>  
463 <sub>48</sub> gene is usually located on conjugative IncL/M plasmids. The IncHI1B plasmid replicon  
464 was responsible for the carriage of *bla*<sub>NDM-1</sub> in strain KP33\_1<sup>73</sup>, different from *bla*<sub>NDM-1-</sub>  
465 producers in this study. A strain reported in the United States (CN1) which harboured an  
466 IncFII/FIB multi-replicon showed similar molecular characteristics with *bla*<sub>NDM-1</sub>-producers in  
467 this study, but it belonged to ST392. Thus, ARGs dissemination may occur in diverse clones  
468 via different plasmid replicon types.

469 There were discrepancies in plasmid numbers and sizes between the gel-based plasmid  
470 characterisation and sequencing analyses, which is expected. This could be due to the break-  
471 up of the plasmids during the extraction process, leading to smaller sizes and higher plasmid  
472 numbers. The PCR-based plasmid typing scheme used in this study was unable to detect  
473 IncX3 plasmids, which were revealed with whole-genome sequencing. This is a limitation in  
474 areas where this typing scheme is solely used as it needs to be modified with new primers  
475 targeting all subtypes of the replicon groups.

476 No single plasmid harboured both ESBL and carbapenemase genes together and the plasmids  
477 harbouring the ESBL genes were of larger sizes with richer resistomes that clustered together  
478 on resistance islands, further supporting the fewer resistomes observed on carbapenemase  
479 plasmids worldwide (Fig. 7). The genetic environment of all the ARGs and mercuric  
480 resistance operons on these self-conjugative plasmids were surrounded by MGEs, which  
481 undoubtedly will facilitate their horizontal transmission. Notably, the genetic support of these  
482 ARGs, particularly of the ESBLs, were similar to those already reported in other studies:  
483 *bla*<sub>CTX-M-15</sub> was always next to ISEc9, *bla*<sub>TEM</sub> was always next to an integrase/recombinase in  
484 close synteny to *bla*<sub>CTX-M-15</sub>, and *bla*<sub>OXA</sub> was always surrounded by *cat* and *aac(3')-II* genes.  
485 As well, *bla*<sub>NDM-1/7</sub>, *bla*<sub>OXA-181</sub>, and *bla*<sub>OXA-48</sub> were also found within several MGEs (Fig. 2-6),  
486 supporting their horizontal transposition.

487 Prophages (bacteriophages), which are involved in transduction of genetic material  
488 horizontally, were abundant on plasmids and chromosomes, with several partial prophage  
489 DNA, suggesting the occurrence of a transduction activity (Fig. S7-S12). Indeed, the presence  
490 of same prophages in different isolates and on both plasmids and chromosomes depict their  
491 horizontal movement and importance in influencing MDR and genomic plasticity or  
492 evolution. Evidently, their presence on these self-transmissible plasmids suggests that they  
493 can be also shared during conjugation. Yet, the presence of prophage DNA and RMS on  
494 plasmids and chromosomes is intriguing as RMS identify and destroy foreign DNA, including  
495 prophages<sup>28,29,74</sup>. However, prophages found on plasmids with the same methylation  
496 signature as the host bacterium may escape destruction by REs and CRISPR-Cas complexes.  
497 Notwithstanding, the interplay between phages and RMS on the same plasmids and  
498 chromosomes will need further investigation to appreciate their co-existence and co-  
499 evolution.

500 The isolates were remarkably endowed with rich RMS comprising types I, II and III RMS,  
501 with type II RMS being more abundant as reported<sup>29,31,74</sup>. Huang et al. (2020) recently  
502 showed that type I RMS were scarce in CPKP, obviously due to the destruction of  
503 carbapenemase-bearing plasmids by the type I RMS; the exception was in isolates that had the  
504 type I RMS on plasmids to protect them from REs<sup>75</sup>. It is thus not surprising that plasmids  
505 harbouring ESBLs and carbapenemases in this study's isolates also had RMS that shared the  
506 same Dam and Dcm motifs with those on the chromosomes and CCWGG motifs of type II  
507 Dcms were virtually absent on chromosomes but ubiquitous on plasmids (Table S4). Indeed,  
508 these RMS were found within MGEs, as already shown<sup>74</sup>, which evidently facilitates their  
509 movement between plasmids, chromosomes and bacteria. Specifically, the multiple copies of  
510 *M.Sfl2ORFAP* on both plasmids and chromosomes in several isolates suggest a transposition  
511 event<sup>74</sup>. Due to the destruction of plasmids or DNA without the same methylation signatures

512 by REs, the presence of the same RMS on plasmids and chromosomes facilitate their safe  
513 entry into host bacteria, enhancing dissemination of virulence and resistance plasmids  
514 between different species.

515 The ubiquitous presence of GATC motifs on only chromosomes and their absence on  
516 plasmids evince the conservation of these motifs and their associated Dams in prokaryotes.  
517 Notably, the preponderance of type II Dcms with CCWGG motifs on plasmids suggest that  
518 their relatively limited presence on chromosomes is due to transposition from plasmids to  
519 chromosomes. Recently, environmental bacteria were found to be abundant in Dams with  
520 GATC and ATGNNNNNGCT motifs<sup>28</sup>, which were mostly found on this study's  
521 isolates' chromosomes. GATC and CCAGG (CCWGG or CCNGG in this study) motifs have  
522 been also identified in *E. coli*<sup>59,74</sup>, showing that plasmids with these RMS and methylation  
523 signatures can be shared between environmental and clinical prokaryotes. Therefore, the  
524 important role of RMS in horizontal resistomes and virulome transmission and regulation  
525 cannot be gainsaid. Further, the regulatory roles of RMS in bacterial virulence was recently  
526 confirmed in hvKP strains in Taiwan; *dam*<sup>-</sup> mutants were found to be less pathogenic in mice  
527 and serum than their wild-type *dam*<sup>+</sup> strains. Hence, the presence of these rich RMS in the  
528 isolates will facilitate their virulence in human and animal hosts. More concerning is the  
529 ability of these RMS to defeat bacteriophage therapy. Indeed, a recent study showed how *K.*  
530 *pneumoniae* quickly developed resistance to bacteriophages during treatment<sup>76</sup>.  
531 Subsequently, detailed investigations should be undertaken to find ways to protect  
532 bacteriophage therapy from destruction or resistance by these RMS systems.

### 533 **3.5 Conclusion**

534 This study has shown the dissemination of *bla*<sub>OXA-48</sub>-like and *bla*<sub>NDM</sub> carbapenemases in MDR  
535 *K. pneumoniae* isolates in hospitals in Gauteng, South Africa, as well as MDR *K. pneumoniae*  
536 in Africa and globally through self-transmissible IncF, A/C, IncX3 and IncL/M plasmids. The

537 global evolutionary epidemiology of *K. pneumoniae* and associated plasmids show the  
538 dissemination and preponderance of MDR, XDR and PDR CRKP globally, including the  
539 possibility of transmitting these plasmids to other bacterial hosts, threatening infectious  
540 disease management. Notably, the important role of RMS in regulating and facilitating the  
541 transcription, transposition, and dissemination of resistance and virulence plasmids is  
542 revealing and requires further investigation as it also threatens both antimicrobial and  
543 bacteriophage chemotherapy. It is essential that rigorous infection prevention and control are  
544 instituted to avoid the selection and dissemination of plasmids harbouring RMS, virulence and  
545 MDR genes in prokaryotes.

546 This study showed *K. pneumoniae* isolates to have resistance profiles to most antibiotics,  
547 including colistin. Among all the tested antibiotics, only a few (amikacin, fosfomycin, and  
548 tigecycline) were still active against these isolates. This raises more concern about treatment  
549 options for CRKP, because colistin is one of the last-resorts for infections caused by these  
550 pathogens. Due to this reason, and reports of poor outcome of colistin monotherapy<sup>13</sup>,  
551 clinicians are left with limited or no treatment options.

## 552 **Materials and Methods**

### 553 ***Bacterial strains and antimicrobial susceptibility testing***

554 A total of 60 non-repetitive *K. pneumoniae* isolates were collected from a referral laboratory  
555 (National Health Laboratory Service/NHLS) in Pretoria. The VITEK 2® automated system  
556 (BioMerieux-Vitek, Marcy-l'Étoile, France) was used for species identification and  
557 antimicrobial susceptibility testing; only those resistant to at least one carbapenem  
558 (ertapenem, meropenem, imipenem, doripenem) were included in further analyses. The *K.*  
559 *pneumoniae* isolates were received on blood agar plates (NHLS, SA) and incubated at 37°C  
560 for 24 hours. Following incubation, confirmation of the Minimal Inhibitory Concentrations

561 (MIC) of the isolates were determined using the MicroScan automated system (Beckman  
562 Coulter, California, United States). The results were interpreted according to the Clinical and  
563 Laboratory Standards Institute (CLSI) breakpoints.

#### 564 ***DNA extraction of carbapenem-resistant *K. pneumoniae* (CRKP) isolates***

565 Total genomic DNA was extracted from all carbapenem-resistant isolates. The DNA was  
566 extracted from an overnight Brain Heart Infusion (BHI) broth using the boiling method. The  
567 cells were heated at 95°C using a digital dry bath (Labnet International, New York, United  
568 States) for 15 minutes and transferred to an ultrasonic bath (Lasec Ltd, Midrand, South  
569 Africa) for another 15 minutes. The resulting supernatant was stored at -20°C freezer until  
570 needed for further analysis and it was used as a template for the PCR assays.

#### 571 ***Detection of carbapenemase genes using PCR assays***

572 PCR was used to screen for the presence of six carbapenemase genes viz., *bla*<sub>IMP</sub>, *bla*<sub>KPC</sub>,  
573 *bla*<sub>VIM</sub>, *bla*<sub>OXA-48</sub>, *bla*<sub>NDM</sub>, and *bla*<sub>GES</sub>. Specifically, multiplex PCR was used for determining  
574 the presence of *bla*<sub>VIM</sub>, *bla*<sub>OXA-48</sub>, and *bla*<sub>NDM</sub> while simplex PCR was used for *bla*<sub>IMP</sub>, *bla*<sub>KPC</sub>,  
575 and *bla*<sub>GES</sub> screening. The oligonucleotide primers were synthesized by Inqaba Biotechnical  
576 Industries (Pretoria, SA) (Supplemental data 1). For the PCR reaction, 1 µl of template DNA  
577 was added to 12.5 µl of MyTaq<sup>TM</sup> HS mix (Bioline, London, United Kingdom) while 0.4 µM  
578 of each primer and nuclease-free water (Qiagen, Hilden, Germany) were added to make up  
579 the volume to 25 µl in each PCR tube. The multiplex PCR conditions were as follows: 95°C  
580 for 5 min, followed by 25 cycles of 95°C for 30 sec, 57°C for 45 sec, and 72°C for 30 sec, and  
581 a final extension step at 72°C for 7 min. The PCR amplicon were analysed using 1.5%  
582 Seakem agarose gel (Whitehead Scientific (Pty) Ltd, Cape Town, SA) with 5 µl ethidium  
583 bromide and visualised under Ultraviolet light using the Gel Doc<sup>TM</sup> EZ Gel (BioRad  
584 Laboratories, California, US) bioimaging system. A 100bp ready-to-use DNA ladder (Celtic



585 Molecular Diagnostics, Cape Town, SA) was used to determine the size of the expected  
586 genes. All PCR amplicons were run alongside a positive and negative control.

#### 587 ***Genotyping using Repetitive Extragenic Palindromic (REP) PCR assay***

588 Total genomic DNA from all carbapenem-resistant *K. pneumoniae* isolates were used as  
589 template in the REP-PCR assay. The primer pair sequences REP 1 (5'-  
590 IIIGCGCCGICATCAGGC-3') and REP 2 (5'-ACGTCTTATCAGGCCTAC-3') and PCR  
591 conditions described previously were used in this assay<sup>77</sup>. For the PCR reaction, 1 µl of  
592 template DNA was added to 12.5 µl of MyTaq<sup>TM</sup> HS mix (Bioline, London, United Kingdom)  
593 while 0.4 µM of each primer and nuclease free water (Qiagen, Hilden, Germany) was added  
594 to make up the volume to 25 µl in each PCR tube. The PCR conditions were as follows: an  
595 initial denaturation of 94°C for 3 min, followed by 30 cycles of 94°C for 45 sec, 45.8°C for 1  
596 min, and 72°C for 8 min and a final extension step of 72°C for 16 min. The amplified DNA  
597 amplicons (10 µl) were separated by electrophoresis using 1.5% SeaKem agarose gel  
598 (Whitehead Scientific (Pty) Ltd, Cape Town, South Africa) with 5 µl ethidium bromide. The  
599 gels were run for 3 hour 20 minutes at 80 volts. The DNA amplicons bands were visualised  
600 under Ultraviolet light using the Gel Doc<sup>TM</sup> EZ Gel (BioRad Laboratories, California, United  
601 States) bioimaging system and banding patterns were compared to a 1 kb plus ready-to-use  
602 DNA ladder (Thermo Fisher Scientific, Massachusetts, United States). Analysis of REP-PCR  
603 fingerprints was performed using the GelCompare II software (Applied Maths, Belgium,  
604 Europe). Relatedness was determined by means of the Dice coefficient and unweighted pair  
605 group method with arithmetic mean (UPGMA). In this study a similarity coefficient of 75%  
606 was used to determine different strains of CRKP, i.e. isolates that showed a similarity of 75%  
607 were considered part of the same strain.

#### 608 ***Plasmid characterisation using the PBRT scheme***

609 Plasmid DNA extracted using the plasmid midi kit (Qiagen, Hilden, Germany) was used as  
610 template in characterising plasmids using the PCR-based inc/rep typing scheme. These  
611 plasmids were typed by targeting 19 replicon groups reported in *Enterobacteriaceae* and one  
612 replicon group targeting a virulence plasmid in *K. pneumoniae*. This method was carried out  
613 as previously described with few modifications<sup>78,79</sup>. Modifications were made in multiplex 5,  
614 where A/C and IncT were detected in a multiplex and IncFII plasmids were detected in a  
615 simplex PCR assay instead of multiplex. The IncFII<sub>k</sub> virulence plasmids in *K. pneumoniae*  
616 were also detected. The PCR assays were performed using a SimpliAmp Thermal cycler mini  
617 (Thermo Fisher Scientific, Massachusetts, US) and the PCR conditions used were described  
618 previously<sup>78,79</sup>. Briefly: initial denaturation of 94°C for 5 min, followed by 30 cycles of 94°C  
619 for 1 min, 60°C for 30 sec, and 72°C for 1 min, and a final extension of 72°C for 5 min. For  
620 IncF, IncFII, and IncFII<sub>k</sub> plasmids, same conditions were used except that an annealing  
621 temperature of 54°C for 30 sec was used instead. Supplemental data 1 shows all the primer  
622 sequences that were used for these assays.

### 623 ***Resistance plasmid transferability/mobility***

624 Transferability of resistance plasmids was determined using conjugation experiments. The  
625 experiments were performed on 26 isolates showing reduced susceptibility to meropenem  
626 using a broth mating method. The meropenem-resistant isolates were used as plasmid donors  
627 and the *E. coli* J53-A<sup>r</sup> (sodium-azide resistant) strain served as a recipient strain. For broth  
628 mating, 3-hour growth cultures of donor and recipient strains grown in Luria Bertani (LB)  
629 broth (VWR international, Pennsylvania, US) were mixed with each other at a ratio of 1:4  
630 (donor to recipient) and incubated at 37°C for 3 hours. Grown cells (200 µl) of the mixtures  
631 were spread onto Mueller-Hinton agar (Sigma-Aldrich (Pty) Ltd, Missouri, US) containing  
632 0.5 µg/ml meropenem (Sigma-Aldrich (Pty) Ltd, Missouri, US) and 100 µg/ml sodium azide  
633 (VWR international, Pennsylvania, US) to select only for plasmid-encoded carbapenem

634 resistance and then incubated at 37°C for 24 or 48 hours. PCR assay was used to confirm the  
635 carbapenemase gene (*bla*<sub>NDM-1</sub> and/or *bla*<sub>OXA-48</sub>) carriage by transconjugants.

#### 636 ***Whole-genome sequencing of K. pneumoniae isolates***

637 A total of 6 representative isolates, based on their carbapenemase gene, REP pattern, plasmid  
638 number and type, were selected for WGS. Genomic DNA was extracted from the *K.*  
639 *pneumoniae* isolates Kp8, Kp10, Kp15, Kp29, Kp32, and Kp33 using a Zymo Research  
640 Fungal/Bacterial kit (Inqaba biotec, Pretoria, South Africa) according to the manufacturer's  
641 instructions. Genomic DNA was sent for sequencing at Inqaba Biotec (Pretoria, South Africa)  
642 on the PacBio RSII sequencer (Pacific Biosciences, Menlo Park, CA, United States) at an  
643 average coverage of 90x.

#### 644 ***Genomic analyses and annotation***

645 PacBio's SMRT® Link v8.0 software suite was used for trimming the raw reads, assembling  
646 with HGAP, and determining methylation modifications and motifs (using MotifMaker:  
647 <https://github.com/PacificBiosciences/MotifMaker>) in the genomic sequences. DNA  
648 methylases (MTases), restriction endonucleases (REases) and their motifs were searched from  
649 the Restriction Enzyme Database (REBASE)<sup>80</sup>. Complete genomic annotations were done  
650 with NCBI's PGAP<sup>81</sup>. Clonal sequence types, resistance and virulence genes, plasmid typing,  
651 integrons, transposons, insertion sequences and prophages were determined using online  
652 databases including MLST2.0<sup>82</sup>, ResFinder<sup>83</sup>, BacWGSTdb<sup>84</sup>, Plasmidfinder<sup>85</sup>,  
653 INTEGRALL (<http://integrall.bio.ua.pt/>), ISFinder<sup>86</sup> and PHASTER<sup>87</sup>, respectively. *K.*  
654 *pneumoniae* capsule polysaccharide-based serotyping (K-type) was performed using the  
655 Kaptive Web database<sup>88</sup>.

#### 656 ***Chromosomal colistin and fluoroquinolones resistance mutations***

657 Mutations conferring resistance to colistin and fluoroquinolones were determined from the  
658 assembled genomes using BLASTn. Briefly, *mgrB*, *crrB*, *kpnEF*, *phoPQ*, *pmrAB*, *gyrA*, *gyrB*  
659 *parC* and *pare* genes in reference *K. pneumoniae* ATCC 13883 (PRJNA244567) were aligned  
660 with this study's genomes using BLASTn. The mutations in the study's isolates' genomes  
661 were manually curated.

### 662 ***Phylogenomic, phylogeography and resistome analyses***

663 Genome sequences of CRKP strains from South Africa (n=88), Africa (n=380) and globally  
664 (n=343) were downloaded from the PATRIC website (<https://www.patricbrc.org/>);  
665 carbapenemase-producing *K. pneumoniae* genomes (n=190) were further culled from the  
666 global CRKP genomes for the global carbapenemase-producing *K. pneumoniae*  
667 phylogenomics. These genomes, alongside those from this study, were used for the whole-  
668 genome phylogenomics. Four phylogenomic trees viz., one for this study's genomes, one for  
669 South African genomes, one for African genomes and one for global genomes, were drawn  
670 using RAxML's maximum-likelihood based phylogenetic inference. A bootstrap reassessment  
671 of 1000x was used and the trees were annotated using Figtree  
672 (<http://tree.bio.ed.ac.uk/software/figtree/>). Isolates with strong bootstrap support values (>50)  
673 were clustered into a clade and highlighted with the same colour. The resistomes of these  
674 genomes were downloaded from NCBI's Pathogen/Isolate Browser database  
675 (<https://www.ncbi.nlm.nih.gov/pathogens/isolates#/search/>) and the clades' phylogeographies  
676 were manually mapped.

### 677 ***Genomic plasmid typing, evolution, and resistome analyses***

678 Plasmid genomes (n=26) from this study were aligned with MUSCLE. The aligned files were  
679 used to draw a phylogenetic tree with PhyML (<http://www.phylogeny.fr/index.cgi>), using a  
680 bootstrap sampling of 100x. The newick tree file was annotated with Figtree. The genomes of

681 the 26 plasmids were aligned with those of closely related plasmids using progressive Mauve  
682 <sup>89</sup>. The carbapenemase-bearing plasmids of this study were parsed through the BacWGSTdb  
683 database/server to determine other closely related plasmids, their source, incompatibility, and  
684 geographical locations <sup>84</sup>. Carbapenemase-bearing plasmid genomes and meta-data were  
685 downloaded from NCBI and PATRIC (<https://www.patricbrc.org/>). Their plasmid replicons  
686 and resistomes were determined using PlasmidFinder<sup>85</sup> and ResFinder<sup>83</sup>. These were arranged  
687 according to their replicons/incompatibility groups and mapped to show their geographical  
688 distribution.

### 689 *Data availability*

690 All data used in this study are found in the supplemental data and Tables (S1-S5). The  
691 genomes of the isolates used in this study have been deposited in DDBJ/ ENA/GenBank  
692 under BioProject number **PRJNA565241**  
693 (<https://www.ncbi.nlm.nih.gov/bioproject/PRJNA565241>) and accession numbers  
694 VXIW00000000 (KP33), VXIX00000000 (KP32), VXIY00000000 (KP29), VXIZ00000000  
695 (KP15), VXJA00000000 (KP10) and VXJB00000000 (KP8); the versions used in this study  
696 are versions VXIW01000000, VXIX01000000, VXIY01000000, VXIZ01000000,  
697 VXJA01000000, and VXJB01000000.

698 The accession numbers of complete circular plasmids are VXIX01000005 (pKP32.5\_OXA-  
699 48), VXIY01000008 (pKP29.9\_CTXM-15), VXIY01000013 (pK29.13\_MBELLE), whilst  
700 those of partial plasmids are VXJB01000006 (pKP8.6\_CTX-M-15), VXJB01000012  
701 (pKP8.12\_OXA181), VXJA01000008 (pKP10.8\_NDM-1), VXJA01000004  
702 (pKP10.4\_OSEI), VXIZ01000004 (pKP15.4\_KATLEGO), VXIZ01000012  
703 (pKP15.12\_OXA-181), VXIY01000011 (pKP29.11\_NDM-7),  
704 VXIX01000003 (pKP32.3\_CTXM-15), VXIW01000008 (pKP33.8\_NDM-1),  
705 VXIW01000004 (pKP10.4\_OSEI).

706 All kinetic data (methylation) files have been deposited in GEO under accession number  
707 **GSE138949** (<https://www.ncbi.nlm.nih.gov/geo/query/acc.cgi?acc=GSE138949>)  
708 [GSM4125137 (Kp8); GSM4125138 (Kp10); GSM4125139 (Kp15); GSM4125140 (Kp29);  
709 GSM4125141 (Kp32); GSM4588290 (Kp33).

### 710 ***Research ethics***

711 Ethical approval was provided by Faculty of Health Sciences Research Ethics Committee  
712 (209/2018). All protocols and consent forms were executed according to the agreed ethical  
713 approval terms and conditions. All clinical samples were obtained from a reference laboratory  
714 and not directly from patients, who agreed to our using their specimens for this research. The  
715 guidelines stated by the Declaration of Helsinki for involving human participants were  
716 followed in the study

717 **Funding:** Funding for this study was provided by the NHLS, NRF (National Research  
718 Foundation) and the University of Pretoria.

719 **Acknowledgements:** We are grateful to Sebastien Santini - CNRS/AMU IGS UMR7256 for  
720 curating the phylogeny (<http://www.phylogeny.fr/index.cgi>) database.

721 **Author contributions:** **KK** undertook the laboratory work, data curation, initial descriptive  
722 statistics and initial draft of manuscript for her MSc work; **NMM** supervised the study and  
723 provided funding; **JOS** conceived, designed and supervised the study, undertook bio-  
724 informatics analyses and descriptive statistics, data curation, image designs, and the complete  
725 write-up, review and formatting of the manuscript.

## References

1. Friedlaender, C. Ueber die Schizomyceten bei der acuten fibrösen Pneumonie. *Arch. für Pathol. Anat. und Physiol. und für Klin. Med.* **87**, 319–324 (1882).
2. Ashurst, J. V. & Dawson, A. *Pneumonia, Klebsiella*. StatPearls (StatPearls Publishing, Treasure Island (FL), 2018).
3. Jondle, C. N., Gupta, K., Mishra, B. B. & Sharma, J. Klebsiella pneumoniae infection of murine neutrophils impairs their efferocytic clearance by modulating cell death machinery. *PLOS Pathog.* **14**, e1007338 (2018).
4. Kidd, T. J. *et al.* A Klebsiella pneumoniae antibiotic resistance mechanism that subdues host defences and promotes virulence. *EMBO Mol. Med.* **9**, 430–447 (2017).
5. Singh, N. *et al.* How Often Are Antibiotic-Resistant Bacteria Said to “Evolve” in the News? *PLoS One* **11**, e0150396 (2016).
6. Dodd, M. C. Potential impacts of disinfection processes on elimination and deactivation of antibiotic resistance genes during water and wastewater treatment. *J. Environ. Monit.* **14**, 1754 (2012).
7. Navon-Venezia, S., Kondratyeva, K. & Carattoli, A. Klebsiella pneumoniae: a major worldwide source and shuttle for antibiotic resistance. *FEMS Microbiol. Rev.* **41**, 252–275 (2017).
8. Huang, W. *et al.* Emergence and Evolution of Multidrug-Resistant Klebsiella pneumoniae with both blaKPC and blaCTX-M Integrated in the Chromosome. *Antimicrob. Agents Chemother.* **61**, (2017).
9. Osei Sekyere, J. & Amoako, D. G. Carbonyl Cyanide m-Chlorophenylhydrazine (CCCP) Reverses Resistance to Colistin, but Not to Carbapenems and Tigecycline in Multidrug-Resistant Enterobacteriaceae. *Front. Microbiol.* **8**, 228 (2017).
10. Zhong, H., Zhang, S., Pan, H. & Cai, T. Influence of induced ciprofloxacin resistance on efflux pump activity of Klebsiella pneumoniae. *J. Zhejiang Univ. Sci. B* **14**, 837 (2013).
11. Ryu, S., Klein, E. Y. & Chun, B. C. Temporal association between antibiotic use and resistance in Klebsiella pneumoniae at a tertiary care hospital. *Antimicrob. Resist. Infect. Control* **7**, 83 (2018).
12. Mbelle, N. M. *et al.* Pathogenomics and Evolutionary Epidemiology of Multi-Drug Resistant Clinical Klebsiella pneumoniae Isolated from Pretoria, South Africa. *Sci. Rep.* **10**, 1–17 (2020).
13. Lin, Y.-T. *et al.* Appropriate Treatment for Bloodstream Infections Due to Carbapenem-Resistant Klebsiella pneumoniae and Escherichia coli: A Nationwide Multicenter Study in Taiwan. *Open Forum Infect. Dis.* **6**, (2019).
14. Sidjabat, H. *et al.* Carbapenem resistance in Klebsiella pneumoniae due to the New Delhi Metallo- $\beta$ -lactamase. *Clin. Infect. Dis.* **52**, 481–4 (2011).
15. Osei Sekyere, J., Govinden, U. & Essack, S. The Molecular Epidemiology and Genetic Environment of Carbapenemases Detected in Africa. *Microb Drug Resist* **22**, 59–68 (2015).
16. Nordmann, P., Naas, T. & Poirel, L. Global Spread of Carbapenemase-producing Enterobacteriaceae. *Emerg Infect Dis* **17**, (2011).
17. Somboro, A. M., Osei Sekyere, J., Amoako, D. G., Essack, S. Y. & Bester, L. A. Diversity and proliferation of metallo- $\beta$ -lactamases: a clarion call for clinically effective metallo- $\beta$ -lactamase inhibitors. *Appl. Environ. Microbiol.* **27**, AEM.00698-18 (2018).

18. Somboro, A. M. *et al.* 1,4,7-Triazacyclononane Restores the Activity of beta-Lactam Antibiotics against Metallo-beta-Lactamase-Producing Enterobacteriaceae: Exploration of Potential Metallo-beta-Lactamase Inhibitors. *Appl. Environ. Microbiol.* **85**, (2019).
19. Kopotsa, K., Osei Sekyere, J. & Mbelle, N. M. Plasmid Evolution in Carbapenemase-Producing Enterobacteriaceae: A Review. *Ann. New* **1457**, 61–91 (2019).
20. Pedersen, T. *et al.* Spread of Plasmid-Encoded NDM-1 and GES-5 Carbapenemases among Extensively Drug-Resistant and Pandrug-Resistant Clinical Enterobacteriaceae in Durban, South Africa. *Antimicrob. Agents Chemother.* **62**, (2018).
21. Osei Sekyere, J., Maningi, N. E., Modipane, L. & Mbelle, N. M. Emergence of mcr-9.1 in ESBL-producing Clinical Enterobacteriaceae in Pretoria, South Africa: Global Evolutionary Phylogenomics, Resistome and Mobilome. *John. mSystems* **5**, e00148-20 (2020).
22. Pedersen, T. *et al.* Spread of Plasmid-Encoded NDM-1 and GES-5 Carbapenemases among Extensively Drug-Resistant and Pandrug-Resistant Clinical Enterobacteriaceae in Durban, South Africa. *Antimicrob. Agents Chemother.* **62**, e02178-17 (2018).
23. Mbelle, N. M. *et al.* The Resistome, Mobilome, Virulome and Phylogenomics of Multidrug-Resistant *Escherichia coli* Clinical Isolates from Pretoria, South Africa. *Sci. Rep.* **9**, 1–43 (2019).
24. Harada, S. & Doia, Y. Hypervirulent *Klebsiella pneumoniae*: A call for consensus definition and international collaboration. *Journal of Clinical Microbiology* **56**, (2018).
25. Shen, D. *et al.* Emergence of a multidrug-resistant hypervirulent *klebsiella pneumoniae* sequence type 23 strain with a rare blaCTX-M-24-harboring virulence plasmid. *Antimicrob. Agents Chemother.* **63**, (2019).
26. Li, B. *et al.* Colistin Resistance Gene mcr-1 Mediates Cell Permeability and Resistance to Hydrophobic Antibiotics. *Front. Microbiol.* **10**, (2020).
27. Fang, C. T., Yi, W. C., Shun, C. T. & Tsai, S. F. DNA adenine methylation modulates pathogenicity of *Klebsiella pneumoniae* genotype K1. *J. Microbiol. Immunol. Infect.* **50**, 471–477 (2017).
28. Hiraoka, S. *et al.* Metaepigenomic analysis reveals the unexplored diversity of DNA methylation in an environmental prokaryotic community. *Nat. Commun.* **10**, (2019).
29. Blow, M. J. *et al.* The Epigenomic Landscape of Prokaryotes. *PLoS Genet.* **12**, e1005854 (2016).
30. Asante, J. & Osei Sekyere, J. Understanding antimicrobial discovery and resistance from a metagenomic and metatranscriptomic perspective: Advances and applications. *Environ. Microbiol. Rep.* **11**, 62–86 (2019).
31. Beaulaurier, J. *et al.* Metagenomic binning and association of plasmids with bacterial host genomes using DNA methylation. *Nat. Biotechnol.* **36**, 61–69 (2018).
32. Anonymous. Sixth baby dies in *Klebsiella* outbreak. *news24* (2020).
33. Anonymous. Six babies have died from hospital superbug. *Timeslive* (2018). Available at: <https://www.timeslive.co.za/news/south-africa/2018-09-16-six-babies-have-died-from-hospital-superbug/>. (Accessed: 19th June 2020)
34. Jacobson, R. K. *et al.* Molecular characterisation and epidemiological investigation of an outbreak of blaOXA-181 carbapenemase-producing isolates of *Klebsiella pneumoniae* in South Africa. *S. Afr. Med. J.* **105**, 1030–5 (2015).



35. Osei Sekyere, J. Current State of Resistance to Antibiotics of Last-Resort in South Africa: A Review from a Public Health Perspective. *Front. public Heal.* **4**, 209 (2016).
36. Osei Sekyere, J. Current State of Resistance to Antibiotics of Last-Resort in South Africa: A Review from a Public Health Perspective. *Front. Public Heal.* **4**, 209 (2016).
37. Perovic, O. *et al.* Antimicrobial resistance surveillance in the South African private sector report for 2016. *South African J. Infect. Dis.* **33**, 114–117 (2018).
38. Lowe, M. *et al.* Klebsiella pneumoniae ST307 with blaOXA-181, South Africa, 2014–2016. *Emerg. Infect. Dis.* **25**, 739–747 (2019).
39. Habeeb, M. A., Haque, A., Nematzadeh, S., Iversen, A. & Giske, C. G. High prevalence of 16S rRNA methylase RmtB among CTX-M extended-spectrum  $\beta$ -lactamase-producing Klebsiella pneumoniae from Islamabad, Pakistan. *Int. J. Antimicrob. Agents* **41**, 524–526 (2013).
40. Ocampo, A. M. *et al.* A Two-Year Surveillance in Five Colombian Tertiary Care Hospitals Reveals High Frequency of Non-CG258 Clones of Carbapenem-Resistant Klebsiella pneumoniae with Distinct Clinical Characteristics. *Antimicrob. Agents Chemother.* **60**, 332–342 (2016).
41. Novović, K. *et al.* Molecular Epidemiology of Colistin-Resistant, Carbapenemase-Producing Klebsiella pneumoniae in Serbia from 2013 to 2016. *Antimicrob. Agents Chemother.* **61**, (2017).
42. Bocanegra-Ibarias, P. *et al.* Molecular and microbiological report of a hospital outbreak of NDM-1-carrying Enterobacteriaceae in Mexico. *PLoS One* **12**, e0179651 (2017).
43. Saavedra, S. Y. *et al.* Genomic and Molecular Characterization of Clinical Isolates of Enterobacteriaceae Harboring mcr-1 in Colombia, 2002 to 2016. *Antimicrob. Agents Chemother.* **61**, (2017).
44. Peltier, F. *et al.* Characterization of a multidrug-resistant Klebsiella pneumoniae ST607-K25 clone responsible for a nosocomial outbreak in a neonatal intensive care unit. *J. Med. Microbiol.* **68**, 67–76 (2019).
45. Ekwanzala, M. D., Budeli, P., Dewar, J. B., Kamika, I. & Momba, M. N. B. Draft Genome Sequences of Novel Sequence Type 3559 Carbapenem-Resistant *Klebsiella pneumoniae* Isolates Recovered from the Environment. *Microbiol. Resour. Announc.* **8**, (2019).
46. Lynch, T. *et al.* Molecular Evolution of a *Klebsiella pneumoniae* ST278 Isolate Harboring bla<sub>NDM-7</sub> and Involved in Nosocomial Transmission. *J. Infect. Dis.* **214**, 798–806 (2016).
47. Shankar, C., Kumar, S., Venkatesan, M. & Veeraraghavan, B. Emergence of ST147 *Klebsiella pneumoniae* carrying bla<sub>NDM-7</sub> on Inca/C2 with ompK35 and ompK36 mutations in India. *J. Infect. Public Health* **12**, 741–743 (2019).
48. Chou, A. *et al.* Emergence of *Klebsiella pneumoniae* ST273 Carrying bla<sub>NDM-7</sub> and ST656 Carrying bla<sub>NDM-1</sub> in Manila, Philippines. *Microb. Drug Resist.* **22**, 585–588 (2016).
49. Lee, C.-S., Vasoo, S., Hu, F., Patel, R. & Doi, Y. *Klebsiella pneumoniae* ST147 coproducing NDM-7 carbapenemase and RmtF 16S rRNA methyltransferase in Minnesota. *J. Clin. Microbiol.* **52**, 4109–10 (2014).
50. Moussounda, M. *et al.* Emergence of bla<sub>NDM-7</sub>-Producing Enterobacteriaceae in Gabon, 2016. *Emerg. Infect. Dis.* **23**, 356–358 (2017).
51. Tuon, F. F. *et al.* Risk factors for mortality in patients with ventilator-associated pneumonia caused by carbapenem-

- resistant Enterobacteriaceae. *Braz. J. Infect. Dis.* **21**, 1–6 (2017).
52. Gordon, D. *et al.* The Diversity of Lipopolysaccharide ( O ) and Capsular Polysaccharide ( K ) Antigens of Invasive *Klebsiella pneumoniae* in a Multi-Country Collection. *Front. Microbiol.* **11**, (2020).
  53. Pan, Y.-J. *et al.* Genetic analysis of capsular polysaccharide synthesis gene clusters in 79 capsular types of *Klebsiella* spp. *Sci. Rep.* **5**, 15573 (2015).
  54. Li, B., Zhao, Y., Liu, C., Chen, Z. & Zhou, D. Molecular pathogenesis of *Klebsiella pneumoniae*. *Future Microbiol.* **9**, 1071–1081 (2014).
  55. Zhang, Y. *et al.* Emergence of a hypervirulent carbapenem-resistant *Klebsiella pneumoniae* isolate from clinical infections in China. *J. Infect.* **71**, 553–560 (2015).
  56. Liu, B.-T. *et al.* Characteristics of Carbapenem-Resistant Enterobacteriaceae in Ready-to-Eat Vegetables in China. *Front. Microbiol.* **9**, 1147 (2018).
  57. Mei, Y. *et al.* Virulence and Genomic Feature of a Virulent *Klebsiella pneumoniae* Sequence Type 14 Strain of Serotype K2 Harboring blaNDM-5 in China. *Front. Microbiol.* **8**, (2017).
  58. Dong, N., Yang, X., Zhang, R., Chan, E. W.-C. & Chen, S. Tracking microevolution events among ST11 carbapenemase-producing hypervirulent *Klebsiella pneumoniae* outbreak strains. *Emerg. Microbes Infect.* **7**, 146 (2018).
  59. Korotetskiy, I. S. *et al.* Differential gene expression and alternation of patterns of DNA methylation in the multidrug resistant strain *Escherichia coli* ATCC BAA-196 caused by iodine-containing nano-micelle drug FS-1 that induces antibiotic resistance reversion. *bioRxiv* 2020.05.15.097816 (2020). doi:10.1101/2020.05.15.097816
  60. Decano, A. G. *et al.* Plasmids shape the diverse accessory resistomes of *Escherichia coli* ST131. *bioRxiv* 2020.05.07.081380 (2020). doi:10.1101/2020.05.07.081380
  61. Stoesser, N. *et al.* Genome sequencing of an extended series of NDM-producing *Klebsiella pneumoniae* isolates from neonatal infections in a Nepali hospital characterizes the extent of community- versus hospital-associated transmission in an endemic setting. *Antimicrob. Agents Chemother.* **58**, 7347–7357 (2014).
  62. Sugawara, Y. *et al.* Genetic characterization of blaNDM-harboring plasmids in carbapenem-resistant *Escherichia coli* from Myanmar. *PLoS One* **12**, e0184720 (2017).
  63. Huang, T.-W. *et al.* Copy Number Change of the NDM-1 Sequence in a Multidrug-Resistant *Klebsiella pneumoniae* Clinical Isolate. *PLoS One* **8**, (2013).
  64. Du, H. *et al.* Genomic Characterization of *Enterobacter cloacae* Isolates from China That Coproduce KPC-3 and NDM-1 Carbapenemases. *Antimicrob. Agents Chemother.* **60**, 2519–23 (2016).
  65. Poirrel, L., Aires-de-Sousa, M., Kudyba, P., Kieffer, N. & Nordmann, P. Screening and Characterization of Multidrug-Resistant Gram-Negative Bacteria from a Remote African Area, São Tomé and Príncipe. *Antimicrob. Agents Chemother.* **62**, e01021-18 (2018).
  66. Roer, L. *et al.* *Escherichia coli* Sequence Type 410 Is Causing New International High-Risk Clones. *mSphere* **3**, e00337-18 (2018).
  67. Skálová, A. *et al.* Molecular characterization of OXA-48-like-producing Enterobacteriaceae in the Czech Republic: evidence for horizontal transfer of pOXA-48-like plasmids. *Antimicrob. Agents Chemother.* AAC.01889-16 (2016).

doi:10.1128/AAC.01889-16

68. Dortet, L. *et al.* Dissemination of Carbapenemase-Producing Enterobacteriaceae and *Pseudomonas aeruginosa* in Romania. *Antimicrob. Agents Chemother.* **59**, 7100–7103 (2015).
69. Lomonaco, S. *et al.* Resistome of carbapenem- and colistin-resistant *Klebsiella pneumoniae* clinical isolates. *PLoS One* **13**, e0198526 (2018).
70. Muggeo, A. *et al.* Spread of *Klebsiella pneumoniae* ST395 non-susceptible to carbapenems and resistant to fluoroquinolones in North-Eastern France. *J. Glob. Antimicrob. Resist.* **13**, 98–103 (2018).
71. Bedenić, B. *et al.* Epidemic spread of OXA-48 beta-lactamase in Croatia. *J. Med. Microbiol.* **67**, 1031–1041 (2018).
72. Power, K. *et al.* Molecular Analysis of OXA-48-Carrying Conjugative IncL/M-Like Plasmids in Clinical Isolates of *Klebsiella pneumoniae* in Ireland. *Microb. Drug Resist.* **20**, 270–274 (2014).
73. Conlan, S. *et al.* Plasmid Dynamics in KPC-Positive *Klebsiella pneumoniae* during Long-Term Patient Colonization. *MBio* **7**, e00742-16 (2016).
74. Ashcroft, M. M. *et al.* Strain and lineage-level methylome heterogeneity in the multi-drug resistant pathogenic *Escherichia coli* ST101 clone. *bioRxiv* 2020.06.07.138552 (2020). doi:10.1101/2020.06.07.138552
75. Huang, Y., Li, G., Li, M., Wang, Y. & Yang, Z. The high-risk KPC-producing *Klebsiella pneumoniae* lack type I R-M systems. *Int. J. Antimicrob. Agents* 106050 (2020). doi:10.1016/j.ijantimicag.2020.106050
76. Bao, J. *et al.* Non-active antibiotic and bacteriophage synergism to successfully treat recurrent urinary tract infection caused by extensively drug-resistant *Klebsiella pneumoniae*. *Emerg. Microbes Infect.* **9**, 771–774 (2020).
77. Iraz, M. *et al.* Distribution of beta-lactamase genes among carbapenem-resistant *Klebsiella pneumoniae* strains isolated from patients in Turkey. *Ann. Lab. Med.* **35**, 595–601 (2015).
78. Carattoli, A. *et al.* Identification of plasmids by PCR-based replicon typing. *J. Microbiol. Methods* **63**, 219–228 (2005).
79. Villa, L., García-Fernández, A., Fortini, D. & Carattoli, A. Replicon sequence typing of IncF plasmids carrying virulence and resistance determinants. *J. Antimicrob. Chemother.* **65**, 2518–2529 (2010).
80. Roberts, R. J., Vincze, T., Posfai, J. & Macelis, D. REBASE—a database for DNA restriction and modification: enzymes, genes and genomes. *Nucleic Acids Res.* **43**, (2015).
81. Tatusova, T. *et al.* NCBI prokaryotic genome annotation pipeline. **44**, 6614–6624 (2016).
82. Larsen, M. V *et al.* Multilocus Sequence Typing of Total-Genome-Sequenced Bacteria. *J. Clin. Microbiol.* **50**, 1355–1361 (2012).
83. Zankari, E. *et al.* Identification of acquired antimicrobial resistance genes. *J. Antimicrob. Chemother.* **67**, 2640–2644 (2012).
84. Ruan, Z. & Feng, Y. BacWGSTdb, a database for genotyping and source tracking bacterial pathogens. *Nucleic Acids Res.* **44**, 682–687 (2016).
85. Carattoli, A. *et al.* In silico detection and typing of plasmids using PlasmidFinder and plasmid multilocus sequence typing. *Antimicrob Agents Chemother* **58**, 3895–3903 (2014).

86. Siguier, P., Perochon, J., Lestrade, L., Mahillon, J. & Chandler, M. ISfinder: the reference centre for bacterial insertion sequences. *Nucleic Acids Res.* **34**, D32–D36 (2006).
87. Arndt, D. *et al.* PHASTER: a better, faster version of the PHAST phage search tool. *Nucleic Acids Res.* **44**, W16–W21 (2016).
88. Wyres, K. L. & Holt, K. E. *Klebsiella pneumoniae* Population Genomics and Antimicrobial-Resistant Clones. *Trends in Microbiology* **24**, (2016).
89. Darling, A. C. E., Mau, B., Blattner, F. R. & Perna, N. T. Mauve: Multiple alignment of conserved genomic sequence with rearrangements. *Genome Res.* **14**, 1394–1403 (2004).

**Figure 1. Antibiotic susceptibility patterns, carbapenemase genes and plasmid characteristics of 56 clinical *K. pneumoniae* isolates arranged according to their clustering patterns on a REP-PCR dendrogram.** The isolates clustered into 7, based on their gel patterns. Antibiotic resistance is shown as red, intermediate resistance is shown as yellow and susceptibility is shown as green checks. Carbapenemase genes are shown as blue and plasmid replicons are shown as violet/mauve. The number of plasmids is shown in the last column (A). The frequency of resistance to each profiled antibiotic is shown as either resistant (red), intermediate resistance (yellow), and susceptible (green); the frequency of resistance shows MDR phenotypes among the collection (i). Most of the isolates harboured OXA-48 (65%) compared to NDM-1 (29%) whilst a minority had both genes (6%) (ii). IncF plasmid replicons were the commonest plasmid types, being found in all the isolates; IncL, A/C, and IncM were also common types (iii). A gel image of the REP-PCR patterns of the various isolates similar band patterns among the isolates (iv). A conjugation experiment with a receiver *Escherichia coli* showed that 20 out of the 26 meropenem-resistant isolates had mobile plasmids, as shown in the gel image, confirming the reception of carbapenemases by the hitherto susceptible *E. coli* J53-A<sup>r</sup> (sodium-azide resistant) strain (v), (B).

**Figure 2. Graphical annotation and comparative alignment of pKP8.12\_OXA181.** The resistance genes (light green-coloured arrows), transposons (orange-coloured arrows), insertion sequences (orange-coloured arrows), integrons (red-coloured arrows), resolvases (red-coloured arrows), and recombinases/integrases (red-coloured arrows) on the plasmid is shown with their orientation (direction of arrow), synteny and immediate environment. Other genes with unknown functions are hidden to make the image less cluttered. A circular version of the plasmid is shown in (A). A linear version of the plasmid and its alignment with other similar plasmids (linear arrows with yellow highlighted background) are shown in (B); regions of alignment are shown as red-filled portions whilst non-aligned areas are shown as empty arrows. Enlarged section of the plasmid focusing on the resistance genes (genomic resistance island) are shown in (C). This plasmid (VXJB01000012) contains OXA-181.

**Figure 3. Graphical annotation and comparative alignment of pKP10.8\_NDM-1.** The resistance genes (light green-coloured arrows), replicase genes (blue-coloured arrows), methyltransferases/restriction endonucleases (rose-coloured arrows), transposons (orange-coloured arrows), insertion sequences (orange-

coloured arrows), integrons (red-coloured arrows), resolvases (red-coloured arrows), and recombinases/integrases (red-coloured arrows) on the plasmid is shown with their orientation (direction of arrow), synteny and immediate environment. Other genes with unknown functions are hidden to make the image less cluttered. A circular version of the plasmid is shown in (A). A linear version of the plasmid and its alignment with other similar plasmids (linear arrows with yellow highlighted background) are shown in (B); regions of alignment are shown as red-filled portions whilst non-aligned areas are shown as empty arrows. Enlarged section of the plasmid focusing on the resistance genes (genomic resistance island) are shown in (C) and (D). This plasmid (VXJA01000008) contains NDM-1.

**Figure 4. Graphical annotation and comparative alignment of pKP15.12\_OXA-181.** The resistance genes (light green-coloured arrows), transporter genes (deep green-coloured arrows), methyltransferases/restriction endonucleases (rose-coloured arrows), transposons (orange-coloured arrows), insertion sequences (orange-coloured arrows), integrons (red-coloured arrows), resolvases (red-coloured arrows), and recombinases/integrases (red-coloured arrows) on the plasmid is shown with their orientation (direction of arrow), synteny and immediate environment. Other genes with unknown functions are hidden to make the image less cluttered. A circular version of the plasmid is shown in (A). A linear version of the plasmid and its alignment with other similar plasmids (linear arrows with yellow highlighted background) are shown in (B); regions of alignment are shown as red-filled portions whilst non-aligned areas are shown as empty arrows. Enlarged section of the plasmid focusing on the resistance genes (genomic resistance island) are shown in (C). This plasmid (VXIZ01000012) contains OXA-181.

**Figure 5. Graphical annotation and comparative alignment of pKP29.11\_NDM-7.** The resistance genes (light green-coloured arrows), methyltransferases/restriction endonucleases (rose-coloured arrows), transposons (orange-coloured arrows), insertion sequences (orange-coloured arrows), integrons (red-coloured arrows), resolvases (red-coloured arrows), and recombinases/integrases (red-coloured arrows) on the plasmid is shown with their orientation (direction of arrow), synteny and immediate environment. Other genes with unknown functions are hidden to make the image less cluttered. A circular version of the plasmid is shown in (A). A linear version of the plasmid and its alignment with other similar plasmids (linear arrows with yellow highlighted background) are shown in (B); regions of alignment are shown as red-filled portions whilst non-aligned areas are shown as empty arrows. Enlarged section of the plasmid focusing on the resistance genes (genomic resistance island) are shown in (C). This plasmid (VXIY01000011) contains NDM-7.

**Figure 6. Graphical annotation and comparative alignment of pKP32.5\_OXA-48.** The resistance genes (light green-coloured arrows), replicase genes (blue-coloured arrows), methyltransferases/restriction endonucleases (rose-coloured arrows), transposons (orange-coloured arrows), insertion sequences (orange-coloured arrows), integrons (red-coloured arrows), resolvases (red-coloured arrows), and recombinases/integrases (red-coloured arrows) on the plasmid is shown with their orientation (direction of arrow), synteny and immediate environment. Other genes with unknown functions are hidden to make the image less cluttered. A circular version of the plasmid is shown in (A). A linear version of the plasmid and its alignment with other similar plasmids (linear arrows with yellow highlighted background) are shown in (B); regions of alignment are shown as red-filled portions whilst non-aligned areas are shown as empty arrows.

Enlarged section of the plasmid focusing on the resistance genes (genomic resistance island) are shown in (C). This plasmid (VXIX01000005) contains OXA-48.

**Figure 7. Global phylogenetic, resistome and phylogeographic characteristics of carbapenemase-hosting plasmid incompatibility types.** The phylogenetic relationship between the various plasmids obtained in this study are shown in (A), with those bearing CTX-M and/or TEM ESBLs labelled with green text whilst those bearing OXA-181, OXA-48 and NDM-1/7 are labelled with purple, blue and red text respectively; branches of the same clade have the same highlights. The resistomes of carbapenemase-bearing plasmids isolated worldwide are shown in (B) under various plasmid replicon types; the various plasmid types harbouring carbapenemases and associated resistance genes are also shown. The geographical distribution of the plasmid incompatibility groups are shown in (C), and it is evident that most of these plasmids were isolated from North America, Brazil, Columbia, Europe, South Africa, Kenya, Middle East, South-Eastern Asia and Australia.

**Figure 8. Phylogeography and resistome dynamics of *Klebsiella pneumoniae* isolates from South Africa.** Each strain is expressed in specie name, strain, sequence type, date and country of isolation, and host. The phylogenetic relationship between the six isolates are shown in (A) whilst the phylogenetic relationship of the isolates with other isolates from South Africa are shown in (B): isolates from this study are labelled red, those from Pretoria are labelled in mauve/purple text, those from Durban are labelled in blue text, those from Pietermaritzburg are labelled in green text, and those from Ozwatini are labelled in turquoise; members of the same clade (labelled I to XIII) are highlighted with the same colour on the branches. The resistomes of the isolates are shown in (C) under the various clades, with members of the same clade having the same colour as the highlights in the phylogenetic tree in (B); blanks refer to absence of resistance genes and filled sections refers to presence of resistance genes. The phylogeography of the various clades are shown in (D); the isolates were mostly from Pretoria and Durban, with some being from Pietermaritzburg and Ozwatini.

**Figure 9. Phylogeography and resistome dynamics of *Klebsiella pneumoniae* isolates from Africa.** Each strain is expressed in specie name, strain, sequence type, date and country of isolation, and host on the phylogenetic tree shown in (A) under different label colours representative of the country of origin: green (South Africa), red (Ghana), brown (Nigeria), purple (Algeria), blue (Egypt), turquoise (Tunisia), gold (Cameroon), and black (Sudan, Uganda, unknown country). Members of the same clade (labelled I to XVII) are highlighted with the same colour on the branches. The resistomes of the isolates are shown in (B) under the various clades, with members of the same clade having the same colour as the highlights in the phylogenetic tree in (A); blanks refer to absence of resistance genes and filled sections refers to presence of resistance genes. The phylogeography of the various clades are shown in (C) and most of the clades are concentrated in South Africa, Nigeria, Ghana, Tanzania, Malawi, Algeria, Tunisia, and Egypt.

**Figure 10. Global phylogeography and resistome dynamics of carbapenemase-producing *Klebsiella pneumoniae* isolates.** Each strain is expressed in specie name, strain, sequence type, date and country of isolation, and host on the phylogenetic tree shown in (A) under different label colours representative of the country of origin: purple (Italy), green (South Africa), red (China), blue (United States), lemon green (Singapore), orange (U.A.E), pink (Sweden), turquoise (Thailand), gold (Vietnam), mauve (Malaysia), orange (UK, India or Spain). Members of the same clade (labelled I to XVI) are highlighted with the same colour on the

branches. The resistomes of the isolates are shown in (B) under the various clades, with members of the same clade having the same colour as the highlights in the phylogenetic tree in (A); blanks refer to absence of resistance genes and filled sections refers to presence of resistance genes. The phylogeography of the various clades are shown in (C) and most of the clades are concentrated in the USA, Brazil, Europe, UAE, South Africa, and South-Eastern Asia.

**Figure S1. Graphical annotation and comparative alignment of pKP8.6\_CTX-M-15. (1.1)** The resistance genes (light green-coloured arrows), replicase genes (blue-coloured arrows), methyltransferases/restriction endonucleases (rose-coloured arrows), transposons (orange-coloured arrows), insertion sequences (orange-coloured arrows), integrons (red-coloured arrows), resolvases (red-coloured arrows), and recombinases/integrases (red-coloured arrows) on the plasmid is shown with their orientation (direction of arrow), synteny and immediate environment. Other genes with unknown functions are hidden to make the image less cluttered. A circular version of the plasmid is shown in (A). A linear version of the plasmid and its alignment with other similar plasmids (linear arrows with yellow highlighted background) are shown in (B); regions of alignment are shown as red-filled portions whilst non-aligned areas are shown as empty arrows. Enlarged section of the plasmid focusing on the resistance genes (genomic resistance island) are shown in (C), (D) and (E). This plasmid (VXJB01000006) contains CTX-M-15. **(1.2)** Mauve alignment of pKP8.6\_CTX-M-15 (A) and pKP8.12\_OXA181 (B) with other plasmids shows rearrangement of blocks (sections) of the closely related plasmids. Sections of the aligned plasmid genomes that aligns perfectly have the same colour.

**Figure S2. Graphical annotation and comparative alignment of pKP10.4\_OSEI. (2.1)** The resistance genes (light green-coloured arrows), replicase genes (blue-coloured arrows), methyltransferases/restriction endonucleases (rose-coloured arrows), transposons (orange-coloured arrows), insertion sequences (orange-coloured arrows), integrons (red-coloured arrows), resolvases (red-coloured arrows), and recombinases/integrases (red-coloured arrows) on the plasmid is shown with their orientation (direction of arrow), synteny and immediate environment. Other genes with unknown functions are hidden to make the image less cluttered. A circular version of the plasmid is shown in (A). A linear version of the plasmid and its alignment with other similar plasmids (linear arrows with yellow highlighted background) are shown in (B); regions of alignment are shown as red-filled portions whilst non-aligned areas are shown as empty arrows. Enlarged section of the plasmid focusing on the resistance genes (genomic resistance island) are shown in (C) and (D). This plasmid (VXJA01000004) contains TEM-1. **(2.2)** Mauve alignment of pKP10.8\_NDM-1 (A) and pKP10.4\_OSEI (B) with other plasmids shows rearrangement of blocks (sections) of the closely related plasmids. Sections of the aligned plasmid genomes that aligns perfectly have the same colour.

**Figure S3. Graphical annotation and comparative alignment of pKP15.4\_KATLEGO. (3.1)** The resistance genes (light green-coloured arrows), mercury resistance and toIA genes (deep green-coloured arrows), methyltransferases/restriction endonucleases (rose-coloured arrows), transposons (orange-coloured arrows), insertion sequences (orange-coloured arrows), integrons (red-coloured arrows), resolvases (red-coloured arrows), and recombinases/integrases (red-coloured arrows) on the plasmid is shown with their orientation (direction of arrow), synteny and immediate environment. Other genes with unknown functions are hidden to make the image less cluttered. A circular version of the plasmid is shown in (A). A linear version of the plasmid and its alignment with other similar plasmids (linear arrows with yellow highlighted background) are shown in

(B); regions of alignment are shown as red-filled portions whilst non-aligned areas are shown as empty arrows. Enlarged section of the plasmid focusing on the resistance genes (genomic resistance island) are shown in (C) and (D). This plasmid (VXIZ01000004) contains no ESBLs. (3.2) Mauve alignment of pKP15.12\_OXA-181 (A) and pKP15.4\_KATLEGO (B) with other plasmids shows rearrangement of blocks (sections) of the closely related plasmids. Sections of the aligned plasmid genomes that aligns perfectly have the same colour.

**Figure S4. Graphical annotation and comparative alignment of pKP29.8\_CTXM-15 and**

**pK29.13\_MBELLE (4.1 & 4.2)** The resistance genes (light green-coloured arrows), mercury resistance genes (deep green-coloured arrows), methyltransferases/restriction endonucleases (rose-coloured arrows), transposons (orange-coloured arrows), insertion sequences (orange-coloured arrows), integrons (red-coloured arrows), resolvases (red-coloured arrows), and recombinases/integrases (red-coloured arrows) on the plasmid is shown with their orientation (direction of arrow), synteny and immediate environment. Other genes with unknown functions are hidden to make the image less cluttered. A circular version of the plasmid is shown in (A). A linear version of the plasmid and its alignment with other similar plasmids (linear arrows with yellow highlighted background) are shown in (B); regions of alignment are shown as red-filled portions whilst non-aligned areas are shown as empty arrows. Enlarged section of the plasmid focusing on the resistance genes (genomic resistance island) are shown in (C). These plasmids (VXIY01000008 & VXIY01000013) contain CTX-M-15 and no ESBLs respectively. (4.3) Mauve alignment of pKP29.8\_CTXM-15 (A), pK29.13\_MBELLE (B) and pKP29.11\_NDM-7 (C) with other plasmids shows rearrangement of blocks (sections) of the closely related plasmids. Sections of the aligned plasmid genomes that aligns perfectly have the same colour.

**Figure S5. Graphical annotation and comparative alignment of pKP32.3\_CTXM-15. (5.1)**

The resistance genes (light green-coloured arrows), replicase and transporter genes (blue-coloured arrows), mercury resistance and toIA genes (deep green-coloured arrows), methyltransferases/restriction endonucleases (rose-coloured arrows), transposons (orange-coloured arrows), insertion sequences (orange-coloured arrows), integrons (red-coloured arrows), resolvases (red-coloured arrows), and recombinases/integrases (red-coloured arrows) on the plasmid is shown with their orientation (direction of arrow), synteny and immediate environment. Other genes with unknown functions are hidden to make the image less cluttered. A circular version of the plasmid is shown in (A). A linear version of the plasmid and its alignment with other similar plasmids (linear arrows with yellow highlighted background) are shown in (B); regions of alignment are shown as red-filled portions whilst non-aligned areas are shown as empty arrows. Enlarged section of the plasmid focusing on the resistance genes (genomic resistance island) are shown in (C) and (D). This plasmid (VXIX01000003) contains CTX-M-15. (5.2) Mauve alignment of pKP32.3\_CTXM-15 (A) and pKP32.5\_OXA-48 (B) with other plasmids shows rearrangement of blocks (sections) of the closely related plasmids. Sections of the aligned plasmid genomes that aligns perfectly have the same colour.

**Figure S6. Graphical annotation and comparative alignment of pKP33.4\_OSEI and pKP33.8\_NDM-1.**

(6.1) The resistance genes (light green-coloured arrows), replicase and transporter genes (blue-coloured arrows), mercury resistance and toIA genes (deep green-coloured arrows), methyltransferases/restriction endonucleases (rose-coloured arrows), transposons (orange-coloured arrows), insertion sequences (orange-coloured arrows), integrons (red-coloured arrows), resolvases (red-coloured arrows), and recombinases/integrases (red-coloured arrows) on the plasmid is shown with their orientation (direction of arrow), synteny and immediate environment.



Other genes with unknown functions are hidden to make the image less cluttered. A circular version of the plasmid is shown in (A). A linear version of the plasmid and its alignment with other similar plasmids (linear arrows with yellow highlighted background) are shown in (B); regions of alignment are shown as red-filled portions whilst non-aligned areas are shown as empty arrows. Enlarged section of the plasmid focusing on the resistance genes (genomic resistance island) are shown in (C) and (D). These plasmids (VXIW01000004 & VXIW01000008) contains CTX-M-15 and NDM-1, respectively. (6.2 & 6.3) Mauve alignment of pKP33.8\_NDM-1 (A) and pKP33.4\_OSEI (B) with other plasmids shows rearrangement of blocks (sections) of the closely related plasmids. Sections of the aligned plasmid genomes that aligns perfectly have the same colour.

**Figure S7. Types and locations (regions) of prophage DNA in isolate KP8.** Seven complete prophage DNA and two incomplete prophage DNA were identified in KP8, with two complete prophages being found on plasmids (7.1). The protein components of the various prophages are shown in 7.2

**Figure S8. Types and locations (regions) of prophage DNA in isolate KP10.** Three complete prophage DNA and four incomplete prophage DNA were identified in KP10, with one complete prophage being found on a plasmid (8.1). The protein components of the various prophages are shown in 8.2

**Figure S9. Types and locations (regions) of prophage DNA in isolate KP15.** Five complete prophage DNA and two incomplete prophage DNA were identified in KP15, with two complete prophages being found on plasmids (9.1). The protein components of the various prophages are shown in 9.2

**Figure S10. Types and locations (regions) of prophage DNA in isolate KP29.** Five complete prophage DNA and three incomplete prophage DNA were identified in KP29, with one complete prophage being found on a plasmid (10.1). The protein components of the various prophages are shown in 10.2

**Figure S11. Types and locations (regions) of prophage DNA in isolate KP32.** Four complete prophage DNA and four incomplete prophage DNA were identified in KP32, with one complete prophage being found on a plasmid (11.1). The protein components of the various prophages are shown in 11.2

**Figure S12. Types and locations (regions) of prophage DNA in isolate KP33.** Three complete prophage DNA and four incomplete prophage DNA were identified in KP33, with one complete prophage being found on a plasmid (33.1). The protein components of the various prophages are shown in 33.2

**Figure S13. Geographical distribution of plasmids with close nucleotide sequence alignment to this study's carbapenemase-harboured plasmids.** Closely aligned to pKP8.12\_OXA181 plasmids were 201 other plasmids of either IncX<sub>3</sub> or IncX<sub>3</sub>-ColKP3 replicons from mainly *Escherichia coli* and *Klebsiella pneumoniae* isolates and harbouring mostly *bla*<sub>NDM</sub> genes, followed by OXA-181, a few KPC and SHV genes; these were mainly from the US & Canada, Europe, South-East Asia, Nigeria and Australia (13.1). pKP10.8\_NDM-1 and pKP33.8\_NDM-1 were closely aligned to 31 other IncFIB(pB171)-IncFII(Yp) plasmids harbouring NDM-1, *sul*1 and *rmtC* ARGs, which were isolated from *Enterobacter cloacae/hormaechei*, *K. pneumoniae/michiganensis*, *Serratia marcescens*, *E. coli* etc. from North America, Europe, South-East Asia (13.2 & 13.6). Thirty-three IncC plasmids with diverse ARGs but with no carbapenemases, were found to be closely aligned to pKP15.12\_OXA-181. These plasmids were mainly obtained from *Proteus mirabilis*, *E. coli*, *K. pneumoniae*, *Vibrio spp.*, etc. from the US, Greece, and South-East Asia (13.3). pKP29.11\_NDM-7 was of

very close nucleotide sequence alignment with 231 IncX<sub>3</sub>-harbouring NDM (and SHV on some plasmids) or InX<sub>3</sub>-ColKP3-harbouring OXA-181 plasmids from mainly *E. coli*, *K. pneumoniae* and other Enterobacterales from North America, Europe, South East Asia, Australia and Nigeria (13.4). pKP32.5\_OXA-48 aligned closely to 59 IncL (and a few IncM and IncFII) plasmids also harbouring OXA-48 from mainly *E. coli*, *K. pneumoniae* and other Enterobacterales isolated from North America, Europe, the Middle-East, South East Asia, and Morocco (13.5)

**Figure S14. Virulence factors/determinants found in the genomes of the six isolates.** A total of 51 virulence genes were identified in the genomes, with all 51 being found in four isolates irrespective of isolation source OR clonality and 40 being found in KP8 and KP32 (14.1-2). The K and O capsule typing using Kaptive Web showed diversity among both the K and O capsule types among the isolates. The K-loci results showed four different serotypes among the sequenced isolates: KL2 (KP10 and KP33), KL25 (KP15 and KP29), KL27 (KP32) and KL102 (KP8). As well, the O-loci results also showed four O serotypes: O1v1 (KP10, KP33, and KP15), O2v2 (KP8), O4 (KP32), and O5 (KP29). The K- and O-serotyping was not only clone-specific as different clones shared the same K and O serotypes, suggesting that mutations or evolutions in K and O serotypes can occur in individual cells and are not necessarily conserved within clones (14.3-8).

**Supplemental data 1. Primers used to amplify carbapenemases and plasmid replicons used in this study.**

This data consists of two Tables (1 & 2): Table 1 is primer sequences used for detecting carbapenemase genes in PCR assays of the *K. pneumoniae* isolates; and Table 2 is primer sequences used for detecting replicons in CRKP isolates using the PBRT assay.

**Supplemental data 2. Resistance mechanisms of the sequenced *Klebsiella pneumoniae* isolates and their closely related phyletic strains.**

This data shows three Tables: Table 1 shows the resistance determinants of the carbapenem-resistant *K. pneumoniae* isolates; Table 2 shows the ARGs and colistin- and fluoroquinolone-resistance-conferring mutations found on chromosomes of the *Klebsiella pneumoniae* strains; and Table 3 shows the comparison of closely related *K. pneumoniae* strains on the phylogeny tree reported in different countries

**Supplemental data 3. Intact phages identified in carbapenem-resistant *K. pneumoniae* clinical isolates.**

This data shows the distribution of intact phages on the genomes of the various *K. pneumoniae* clinical isolates.

**Table S1. Dataset showing the clinical demographics, antibiotic susceptibility profile, REP-PCR-ordered strains, and chromosomal and plasmid characteristics of the isolates.**

**Table S2. Dataset showing the plasmid evolutionary epidemiology and resistomes of this study's plasmids and that of other closely related plasmids.**

**Table S3. Virulence factor analysis of the *Klebsiella pneumoniae* strains showing the various virulence genes in the six sequenced isolates.**

**Table S4. Methylome data of the *Klebsiella pneumoniae* strains showing the restriction enzymes, type I and type II methylases, their modifications and DNA motifs.**

**Table S5. Genomic metadata of *Klebsiella pneumoniae* strains (genomes) from this study, South Africa, Africa and globally, downloaded from NCBI and PATRIC**

**Table S6. Genomic and resistome metadata of *Klebsiella pneumoniae* strains (genomes) from this study, South Africa, Africa and globally, downloaded from NCBI and PATRIC**



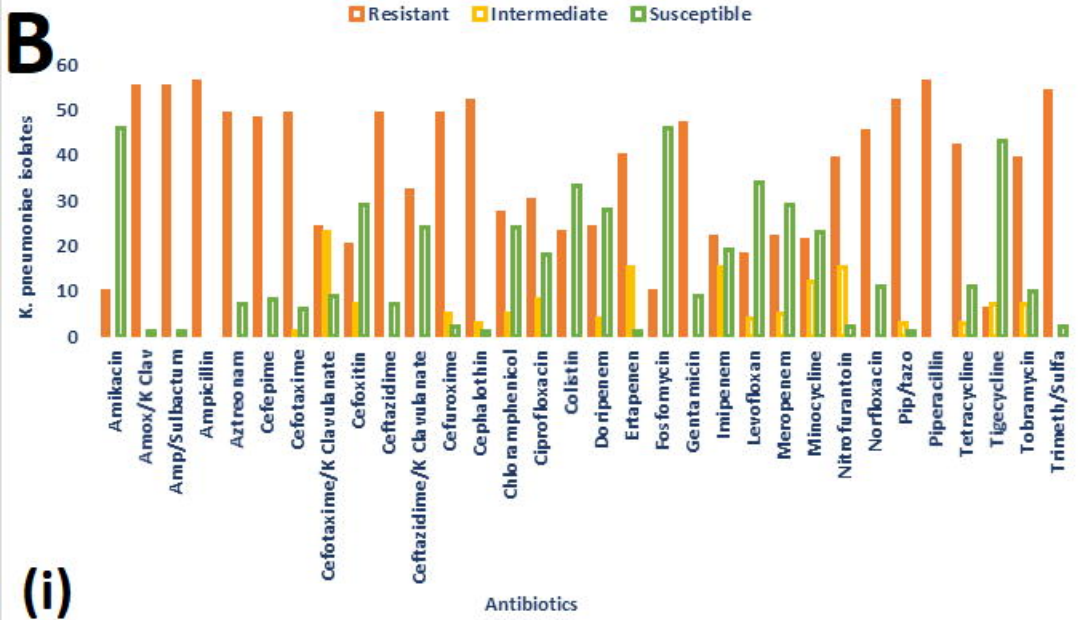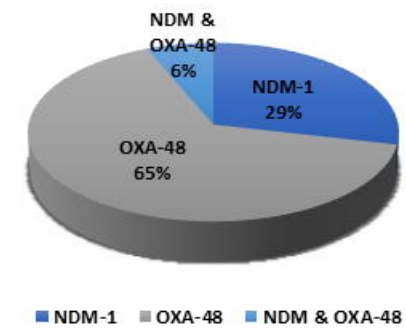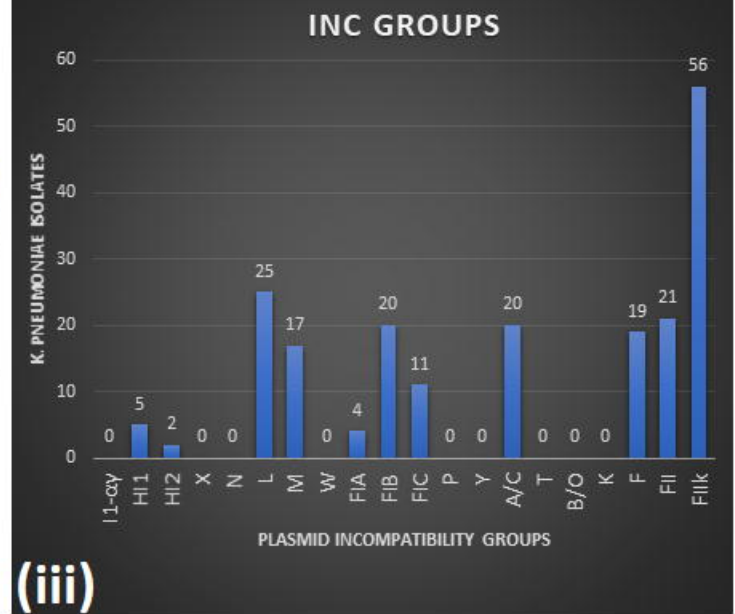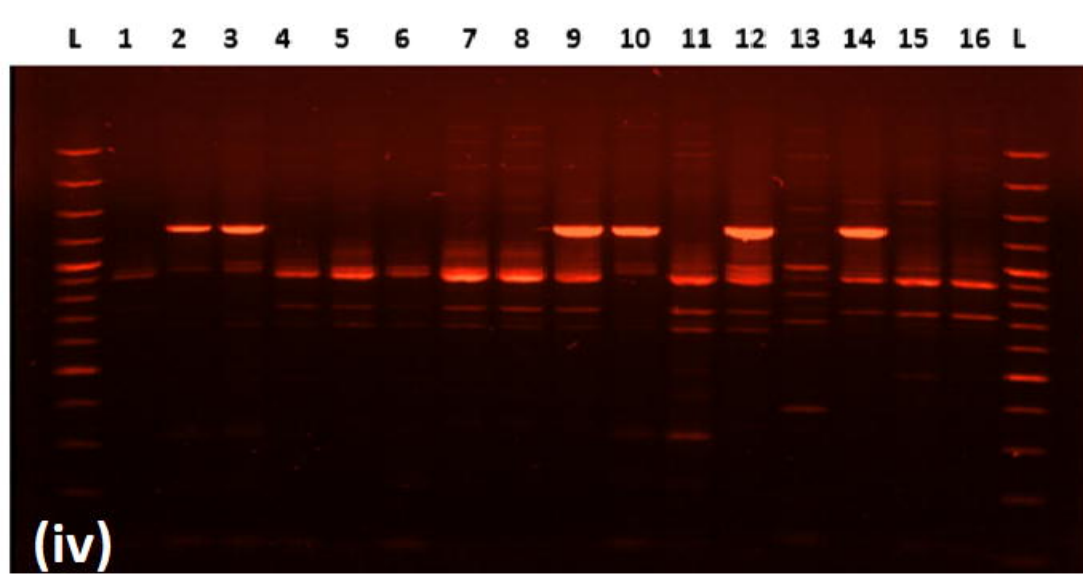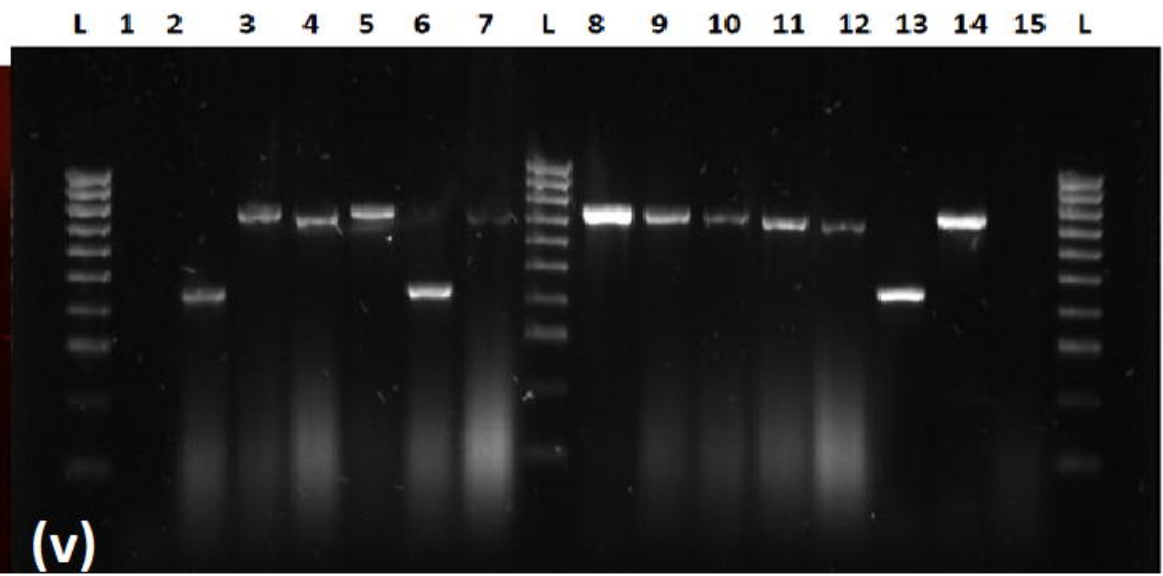

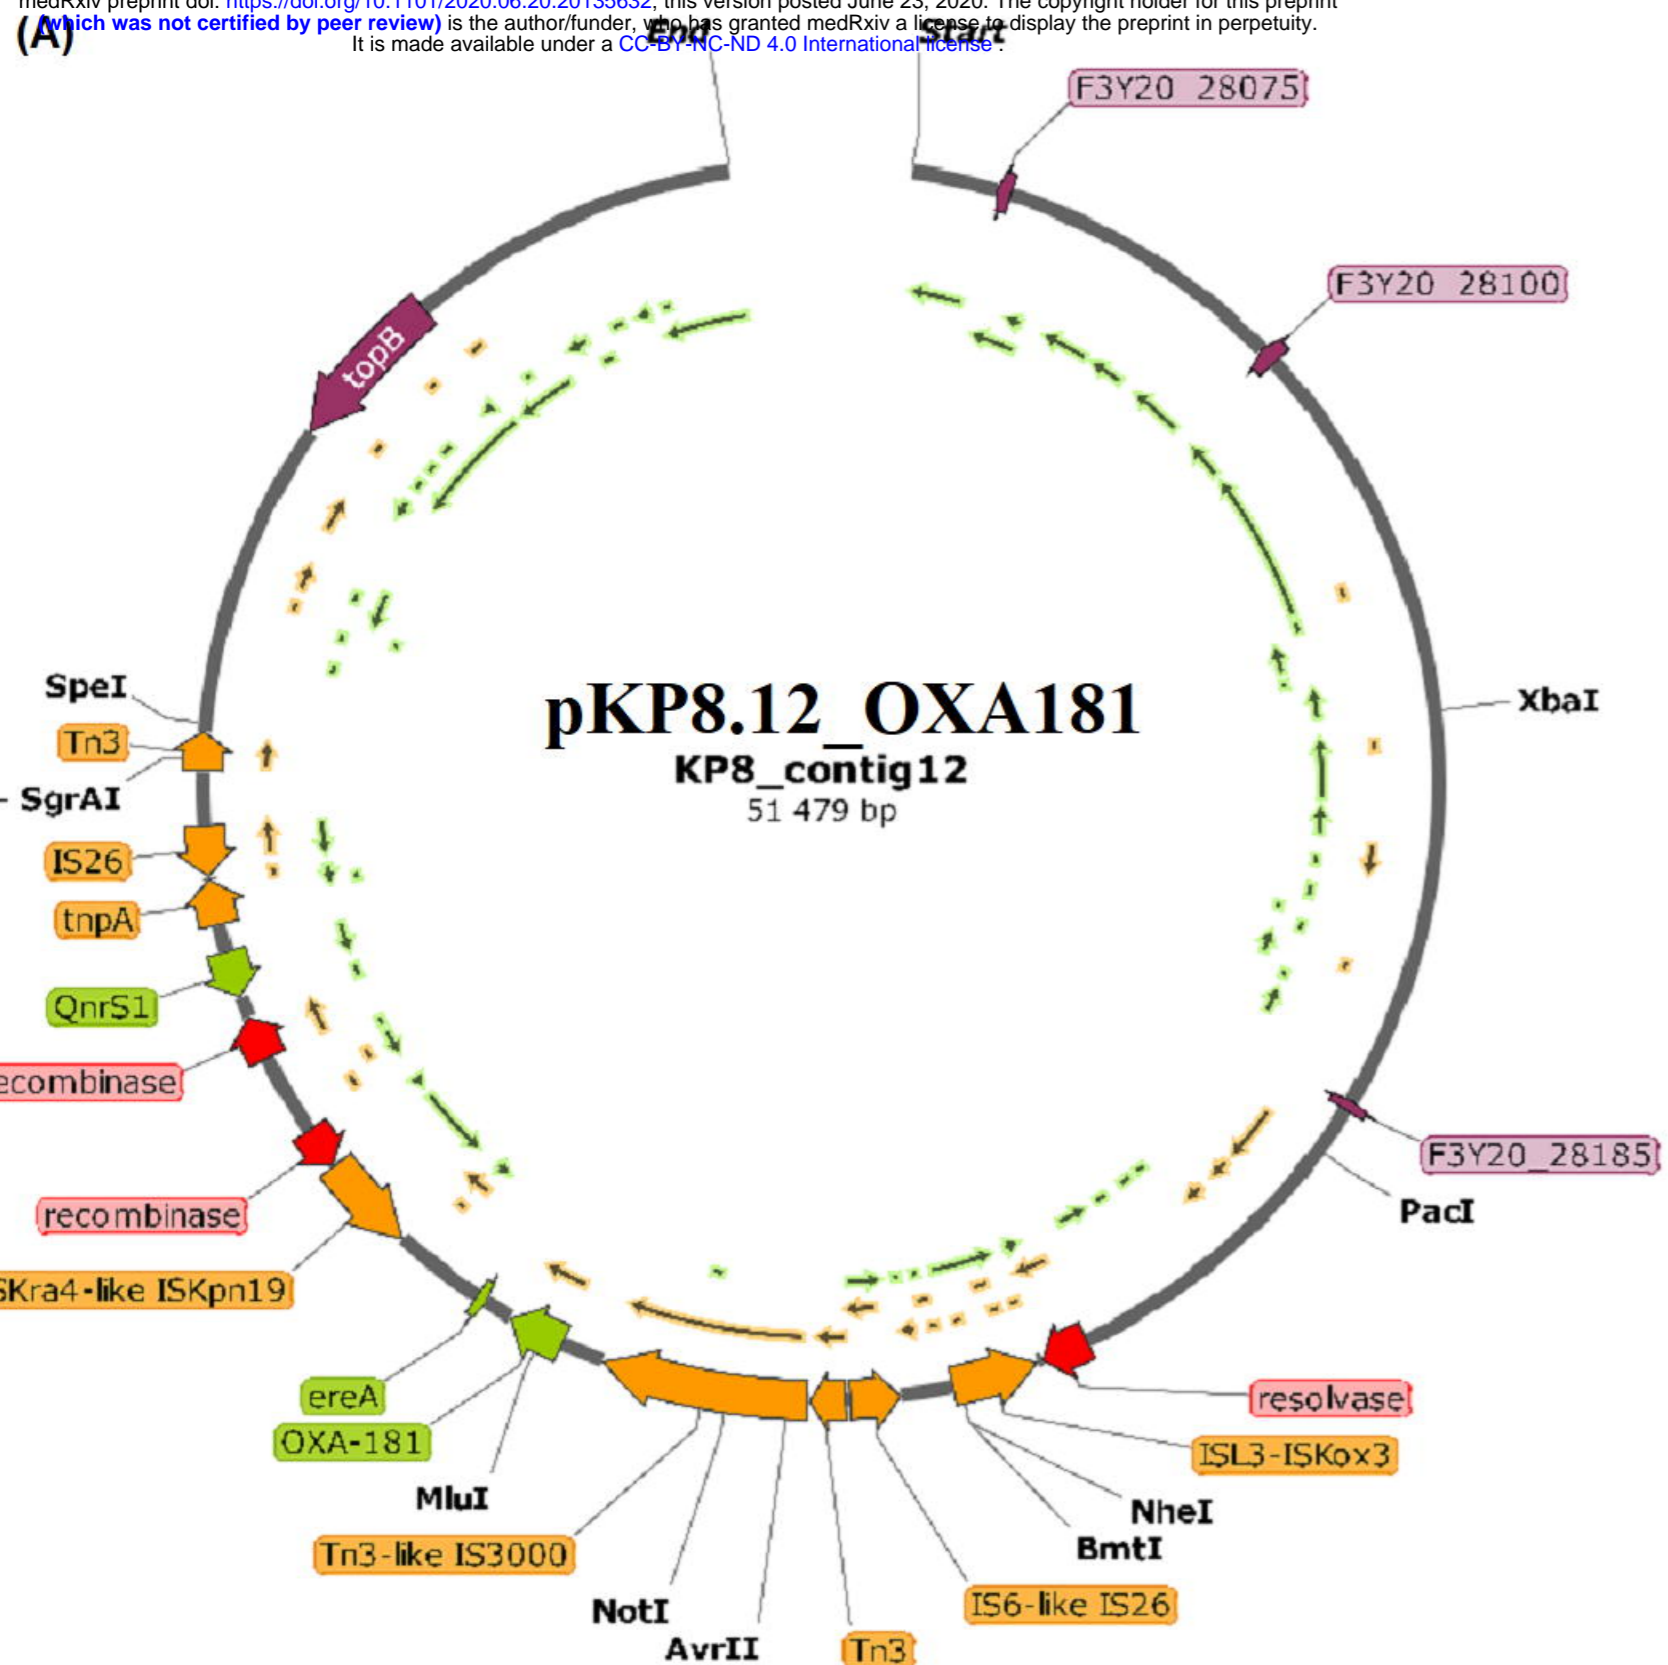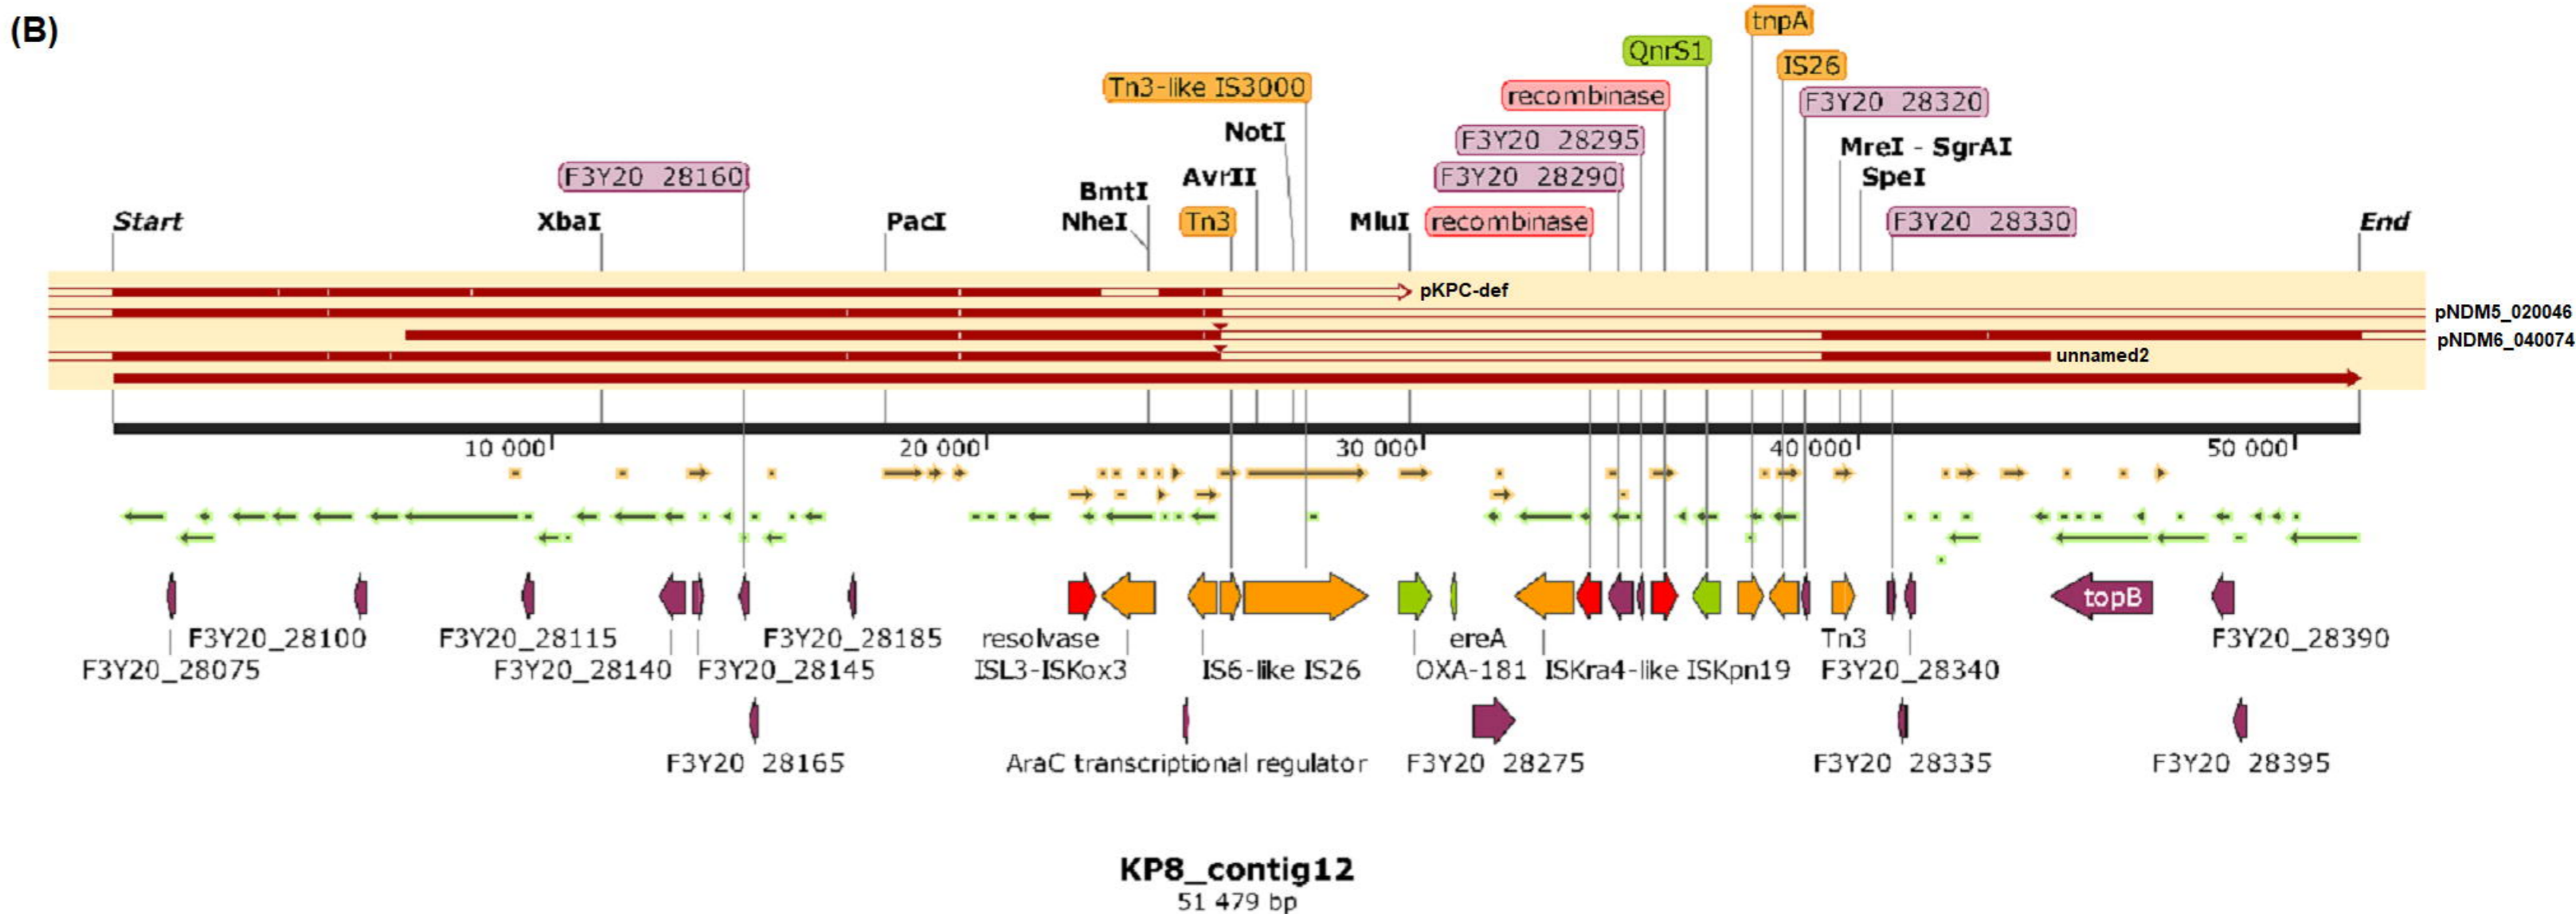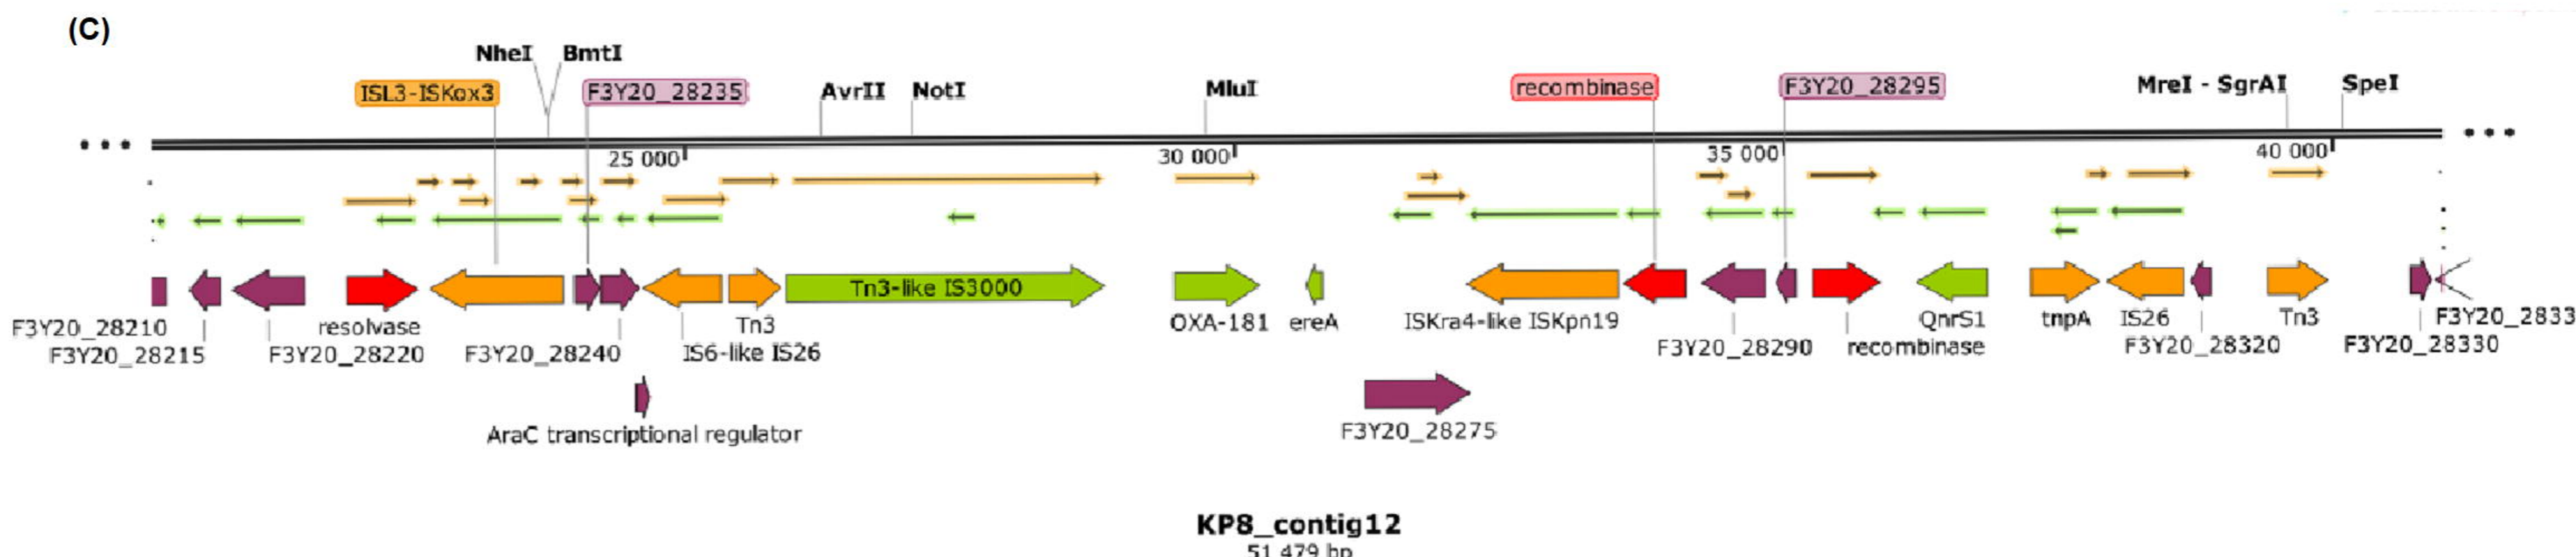

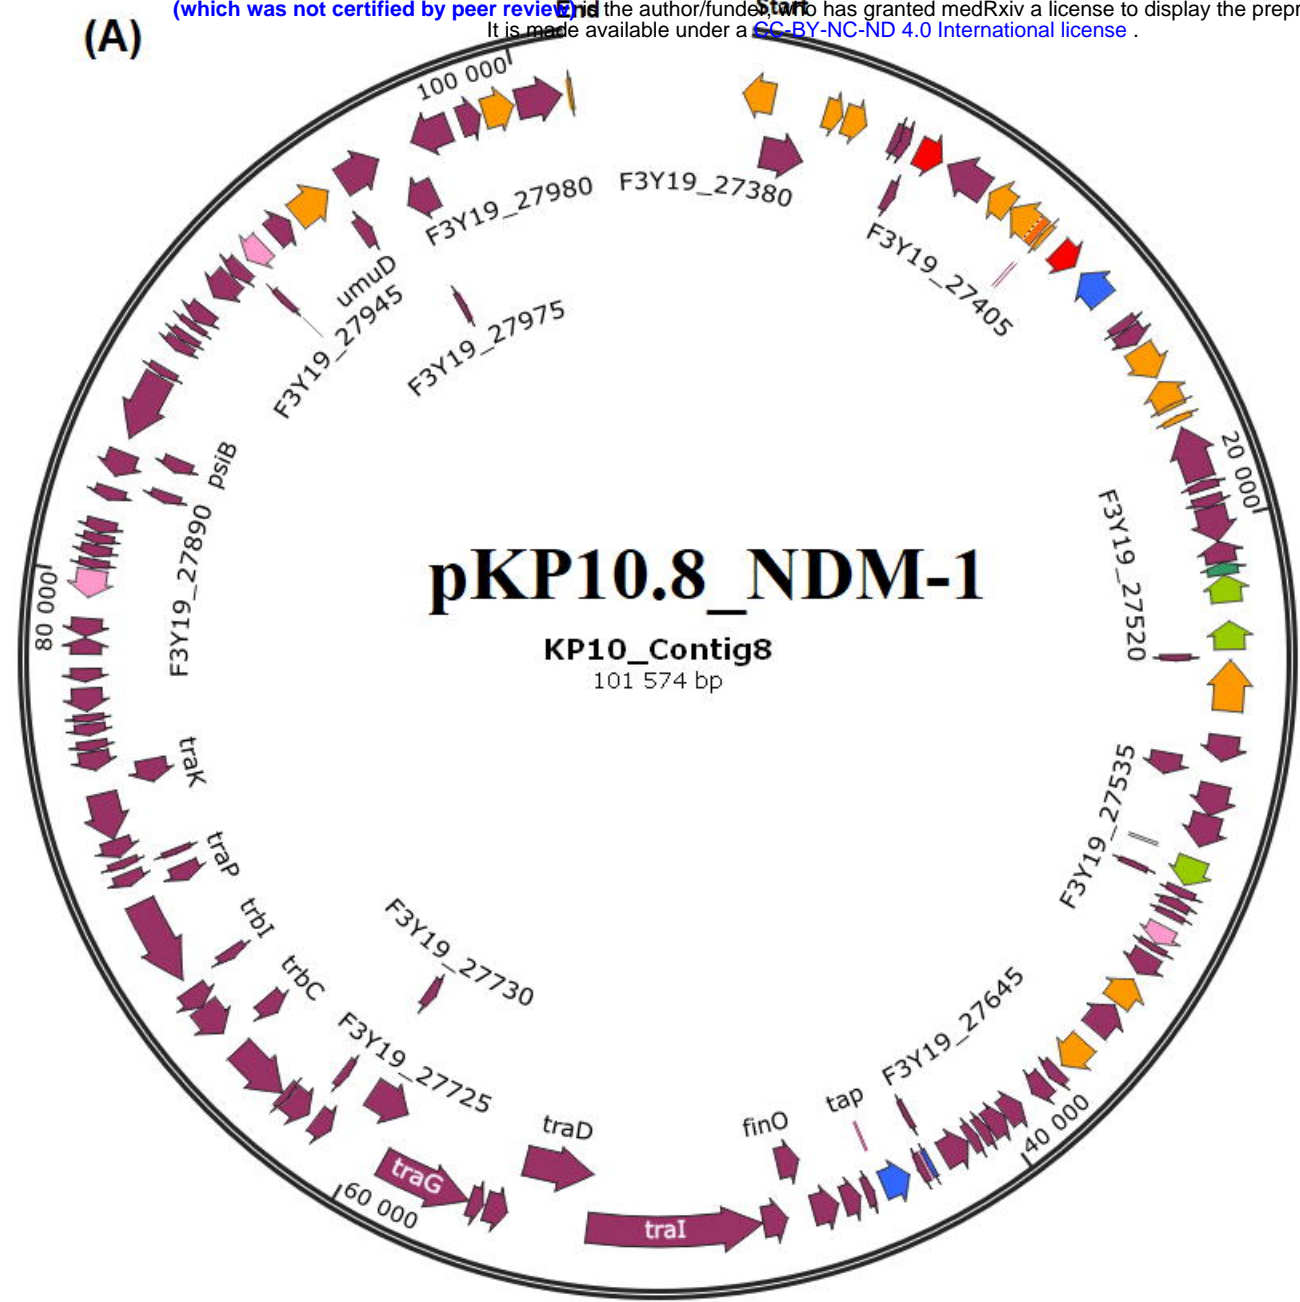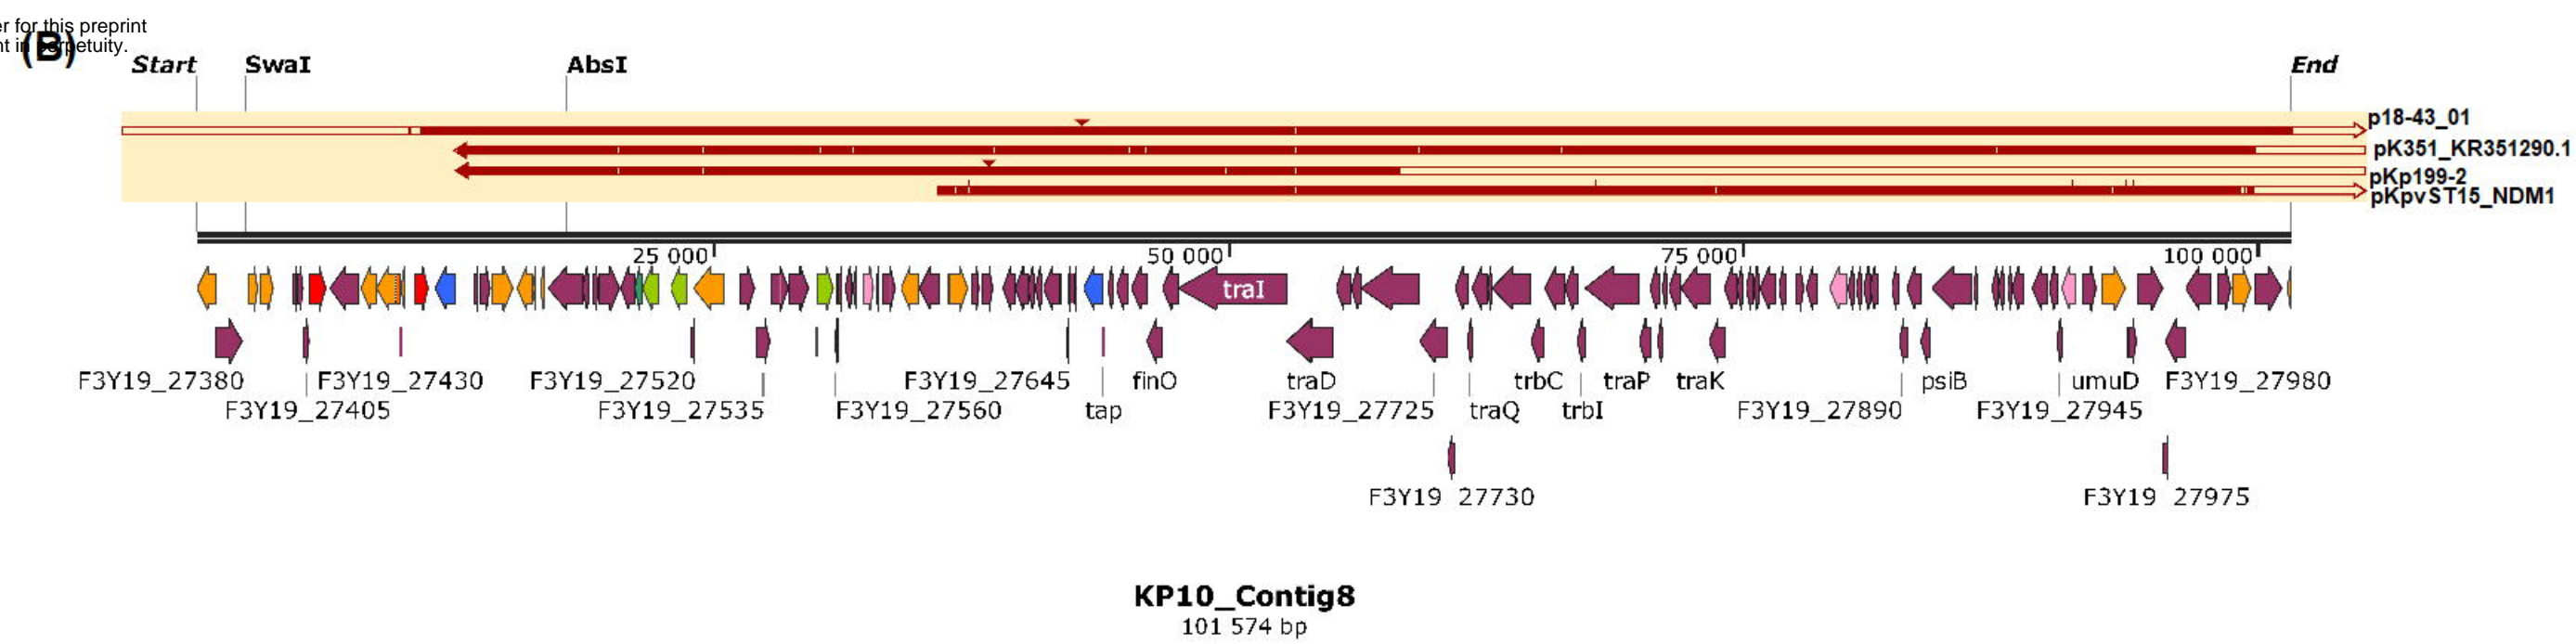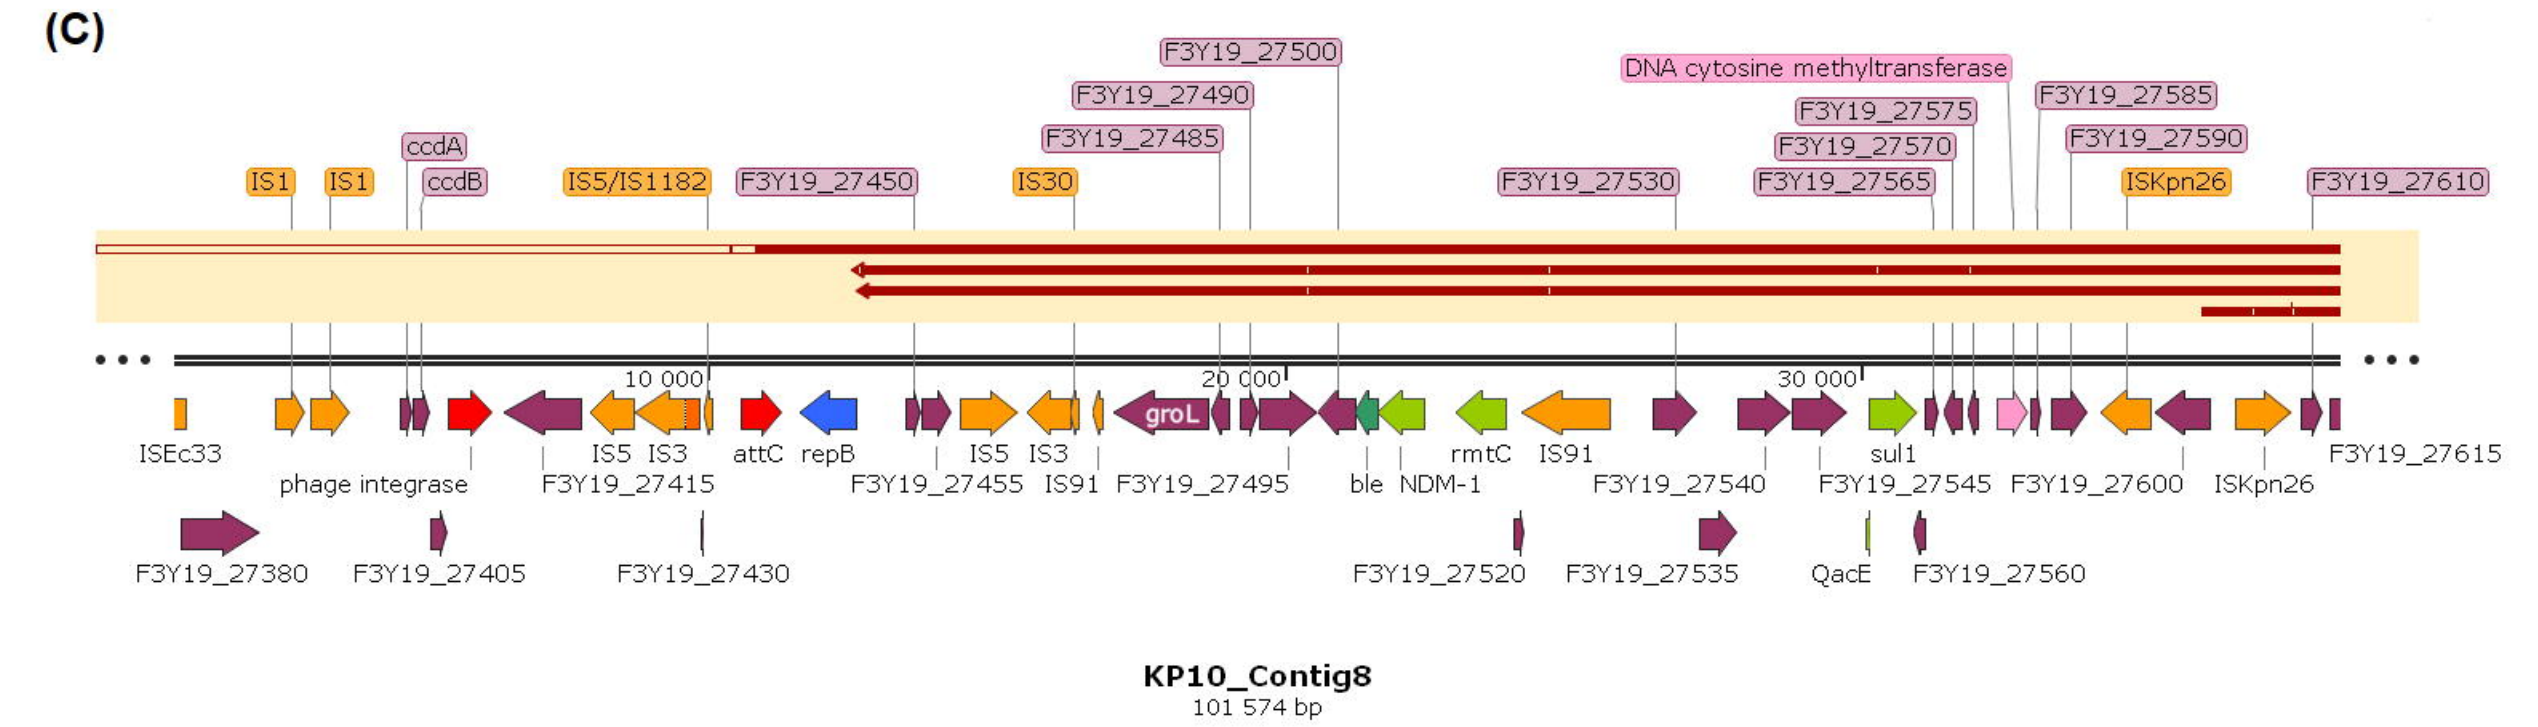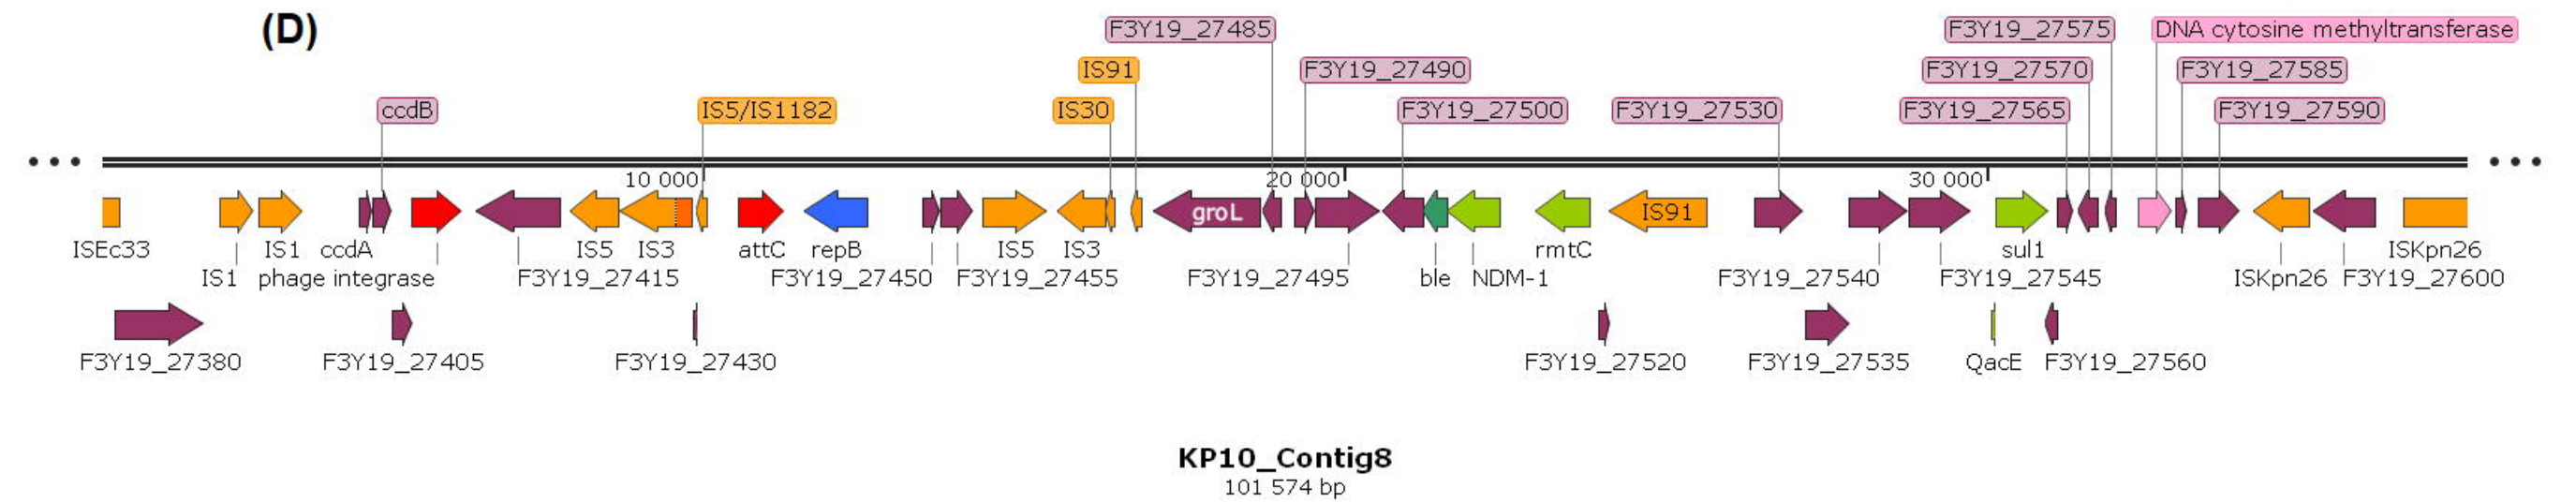

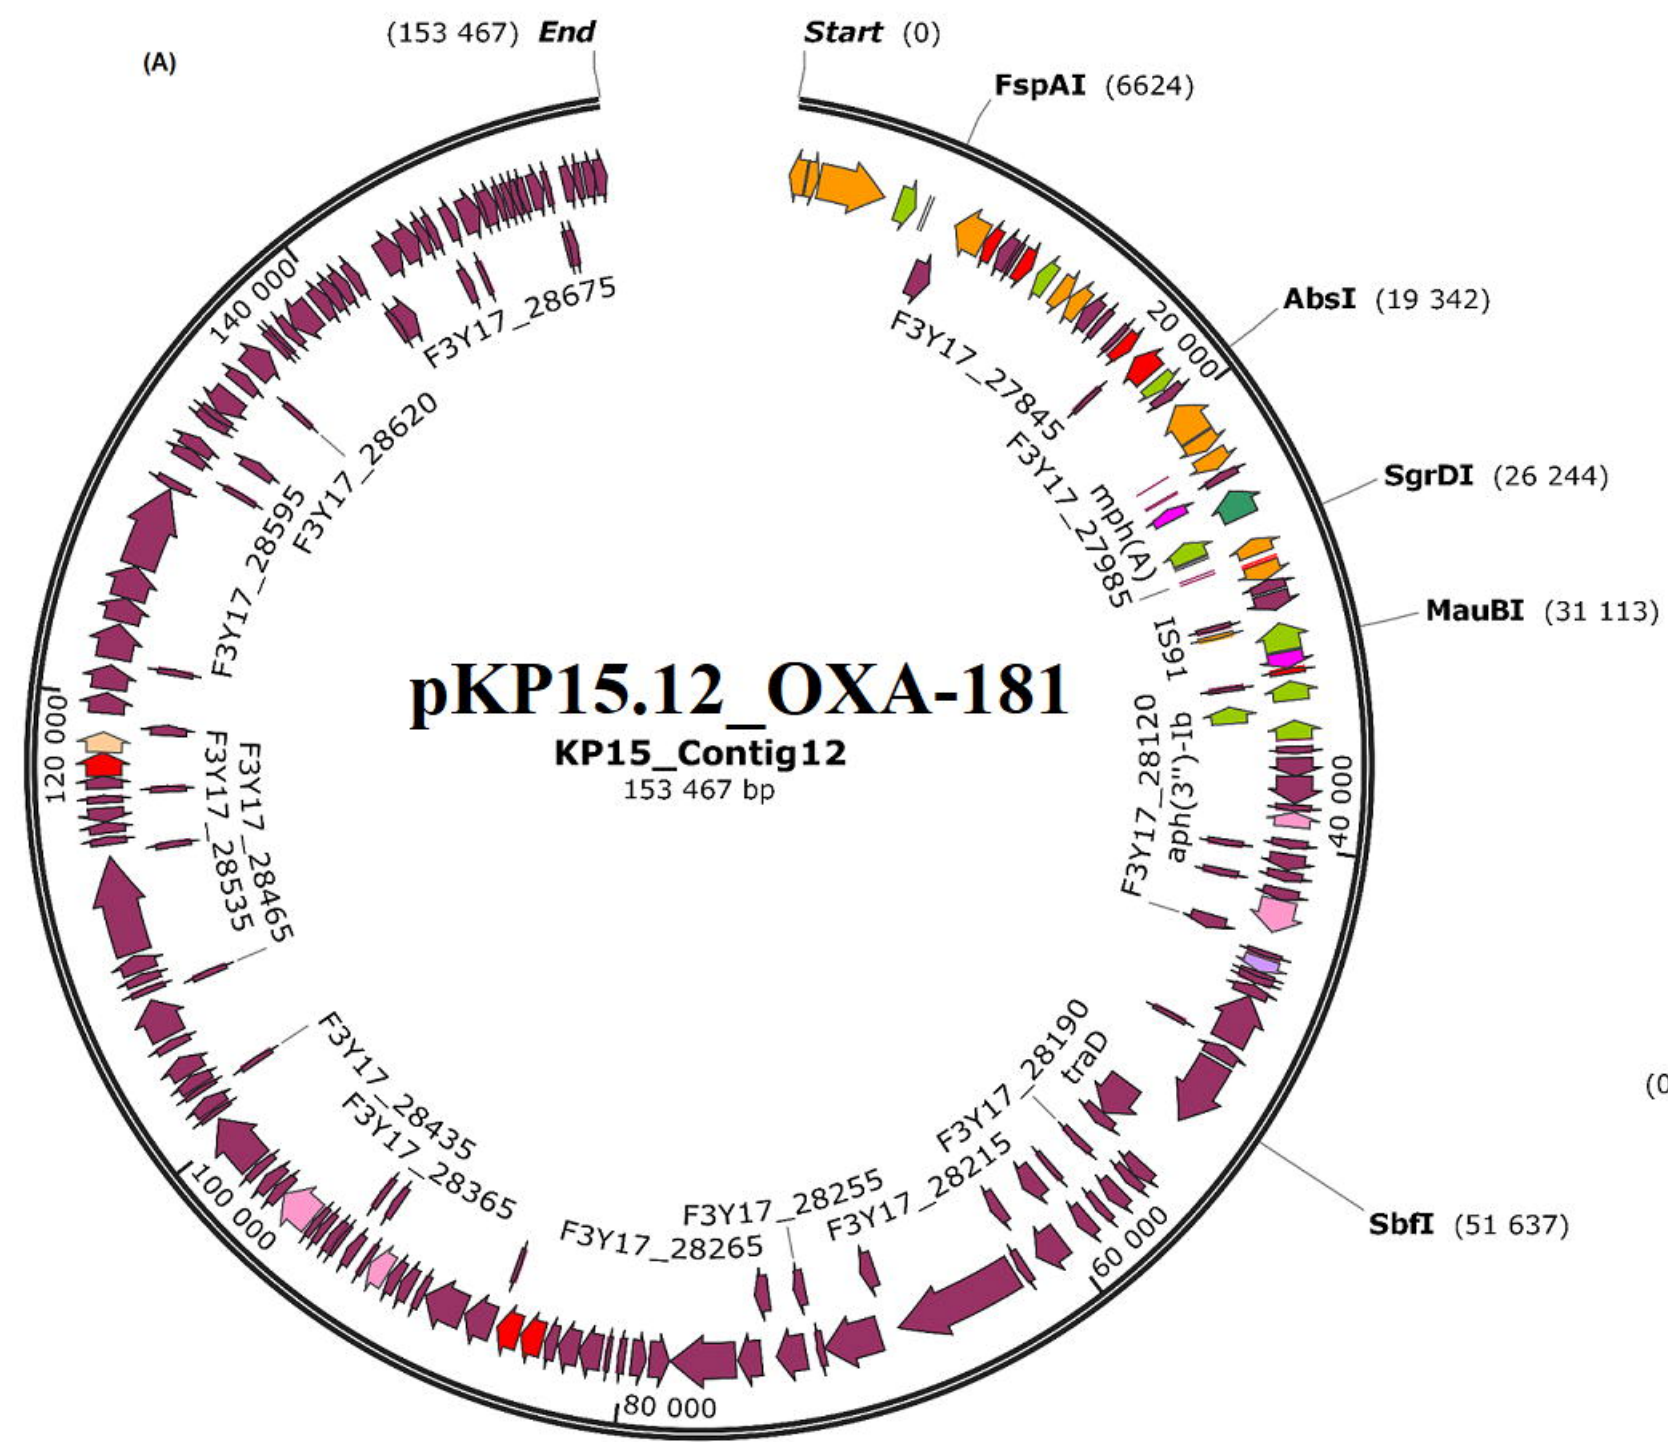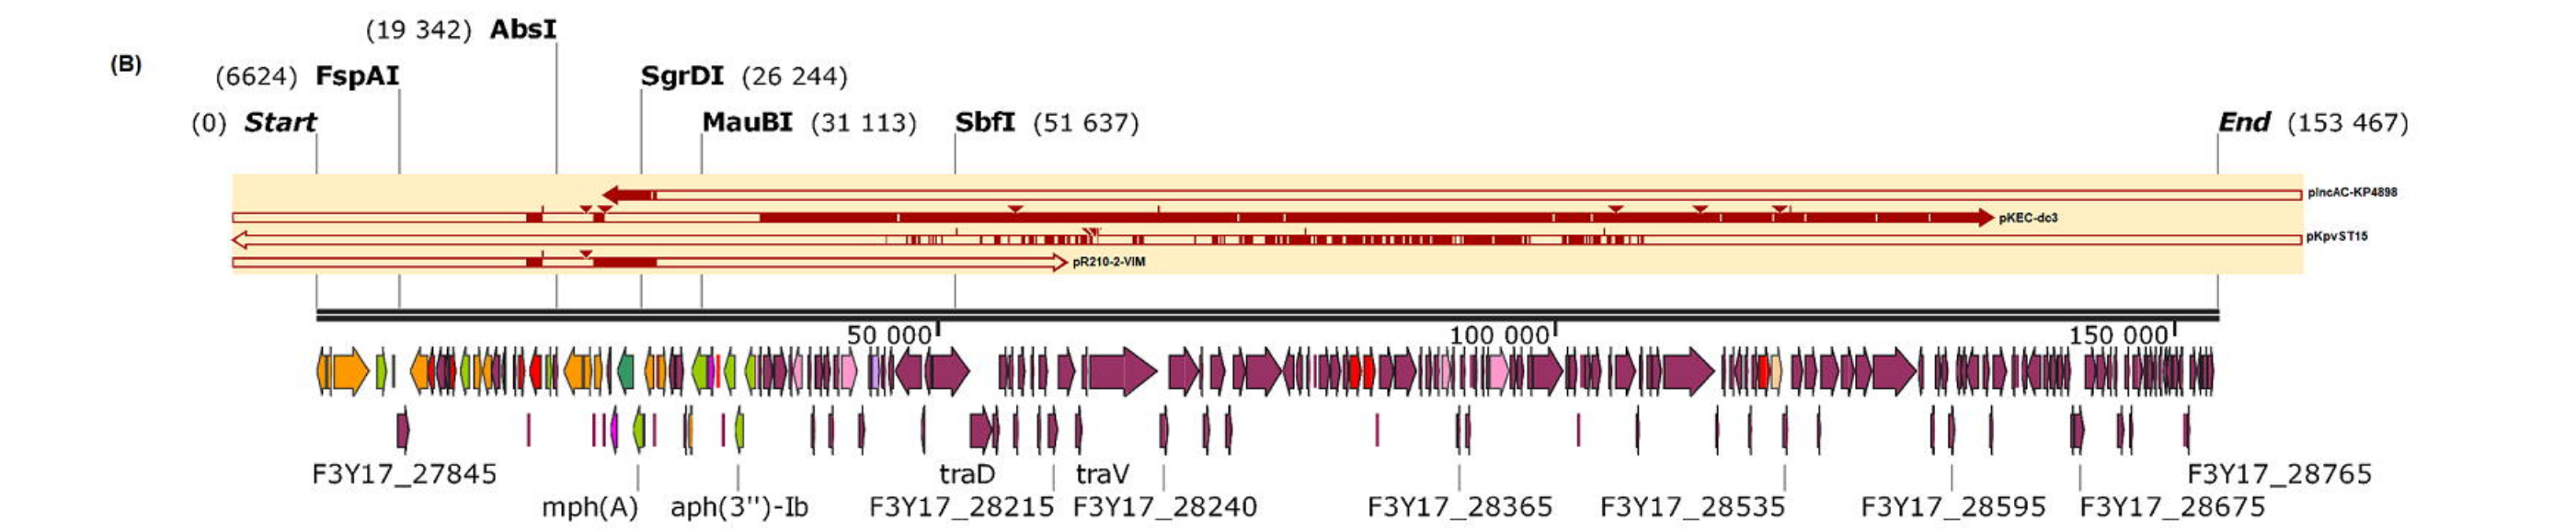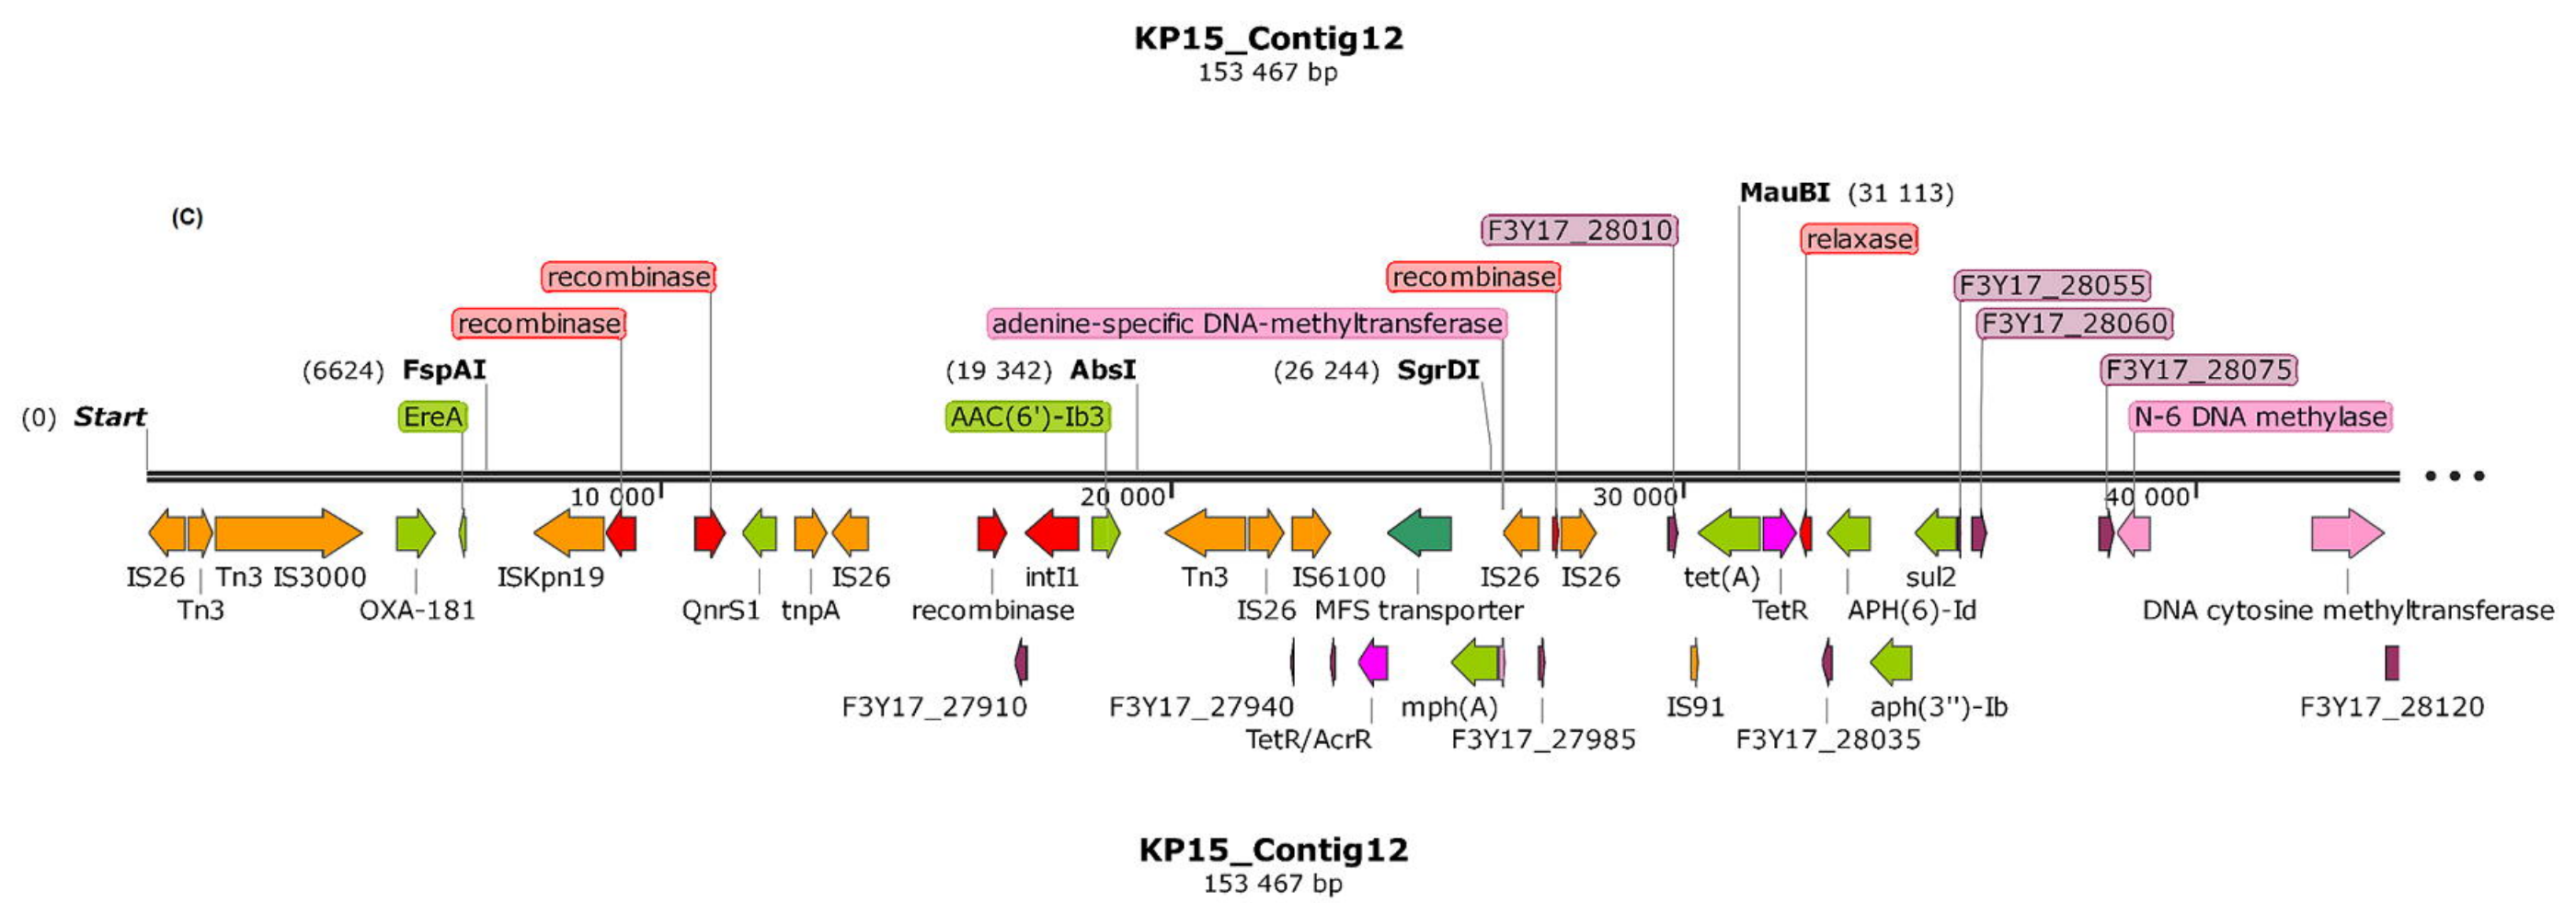



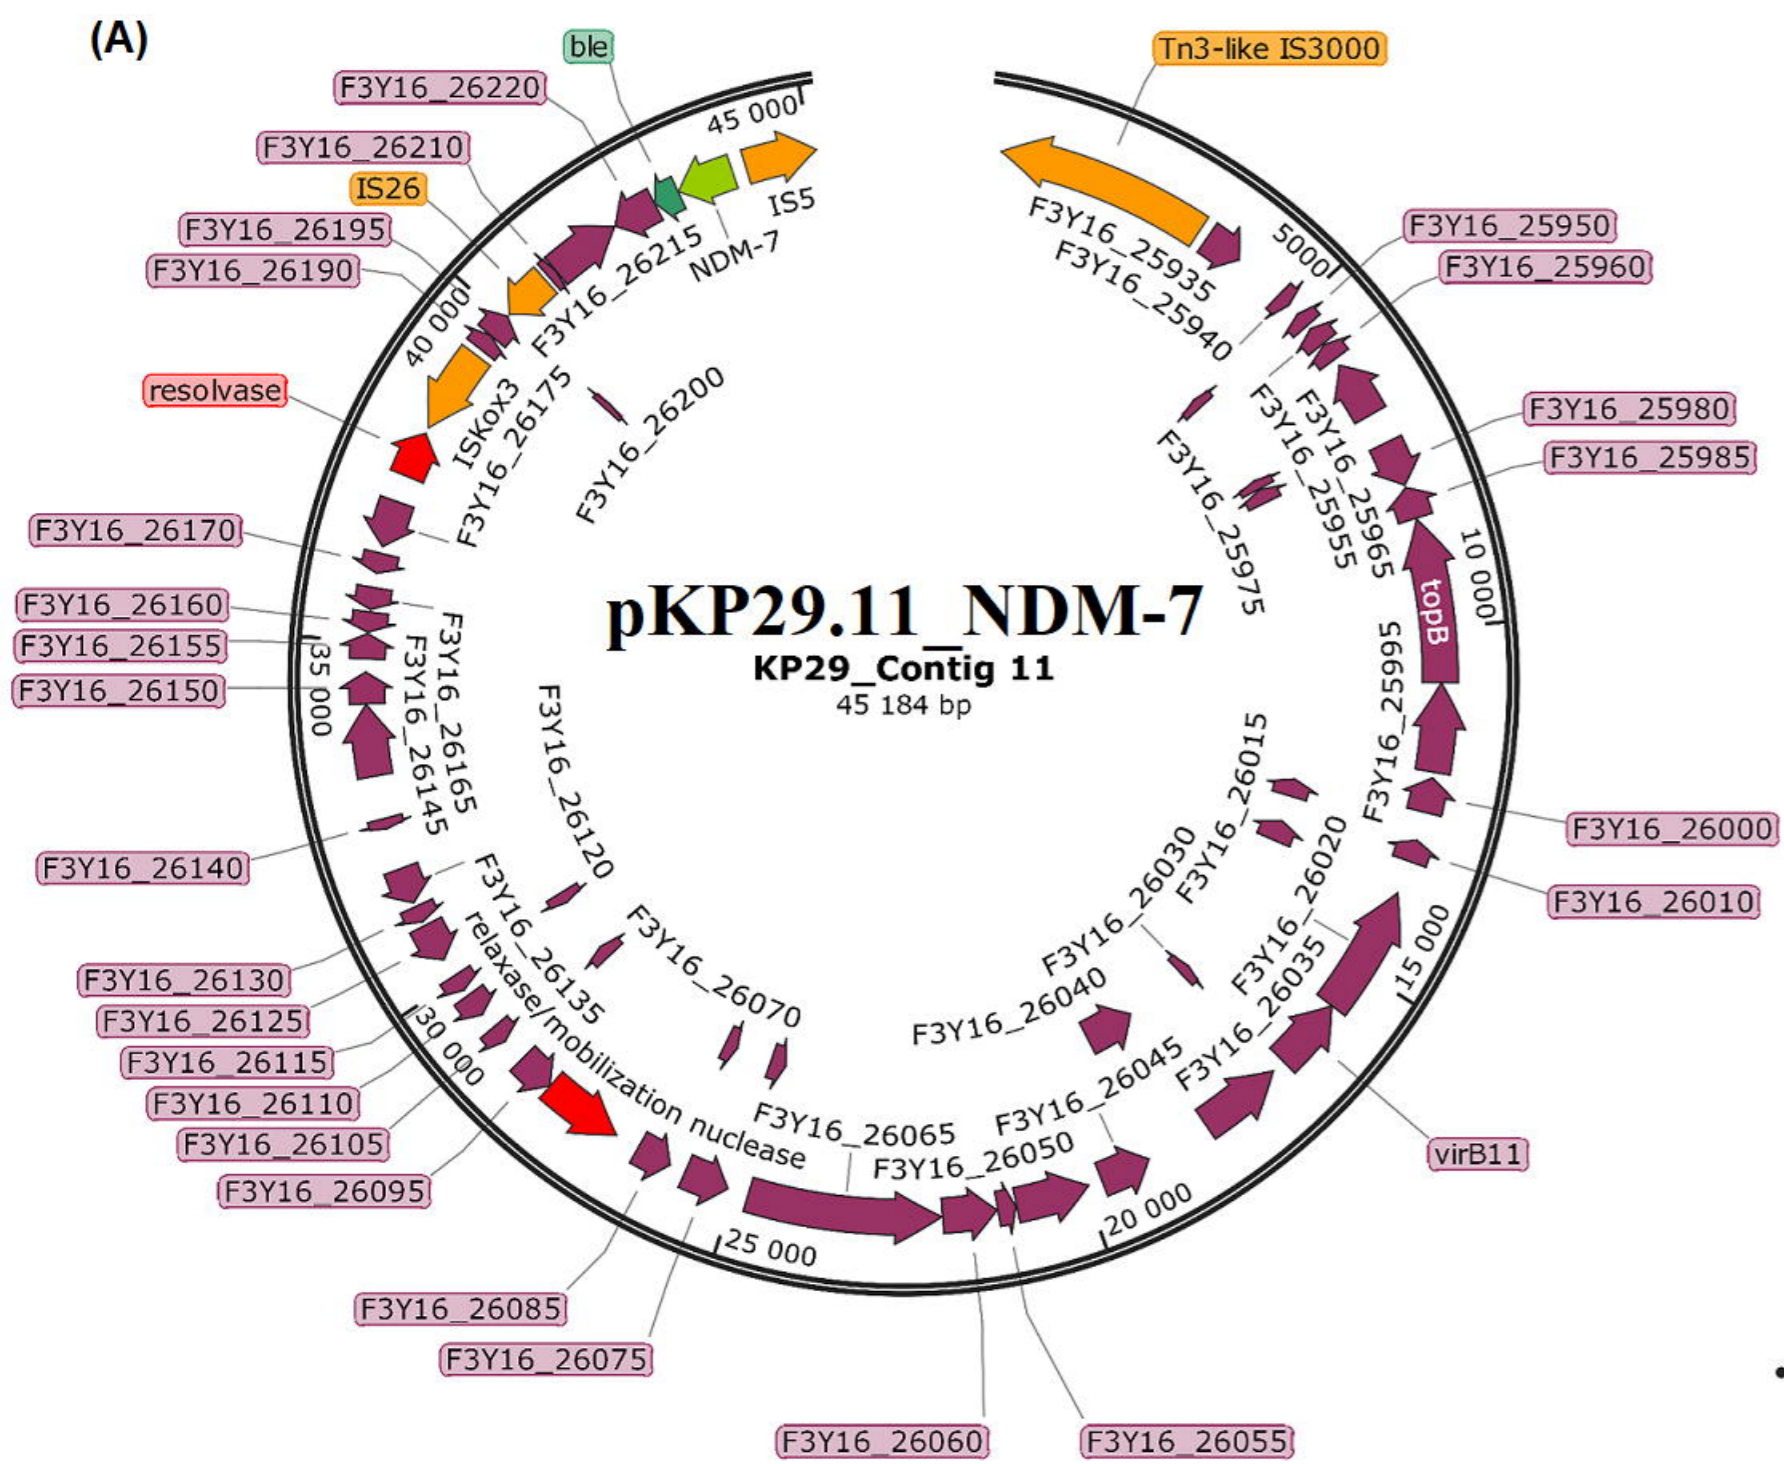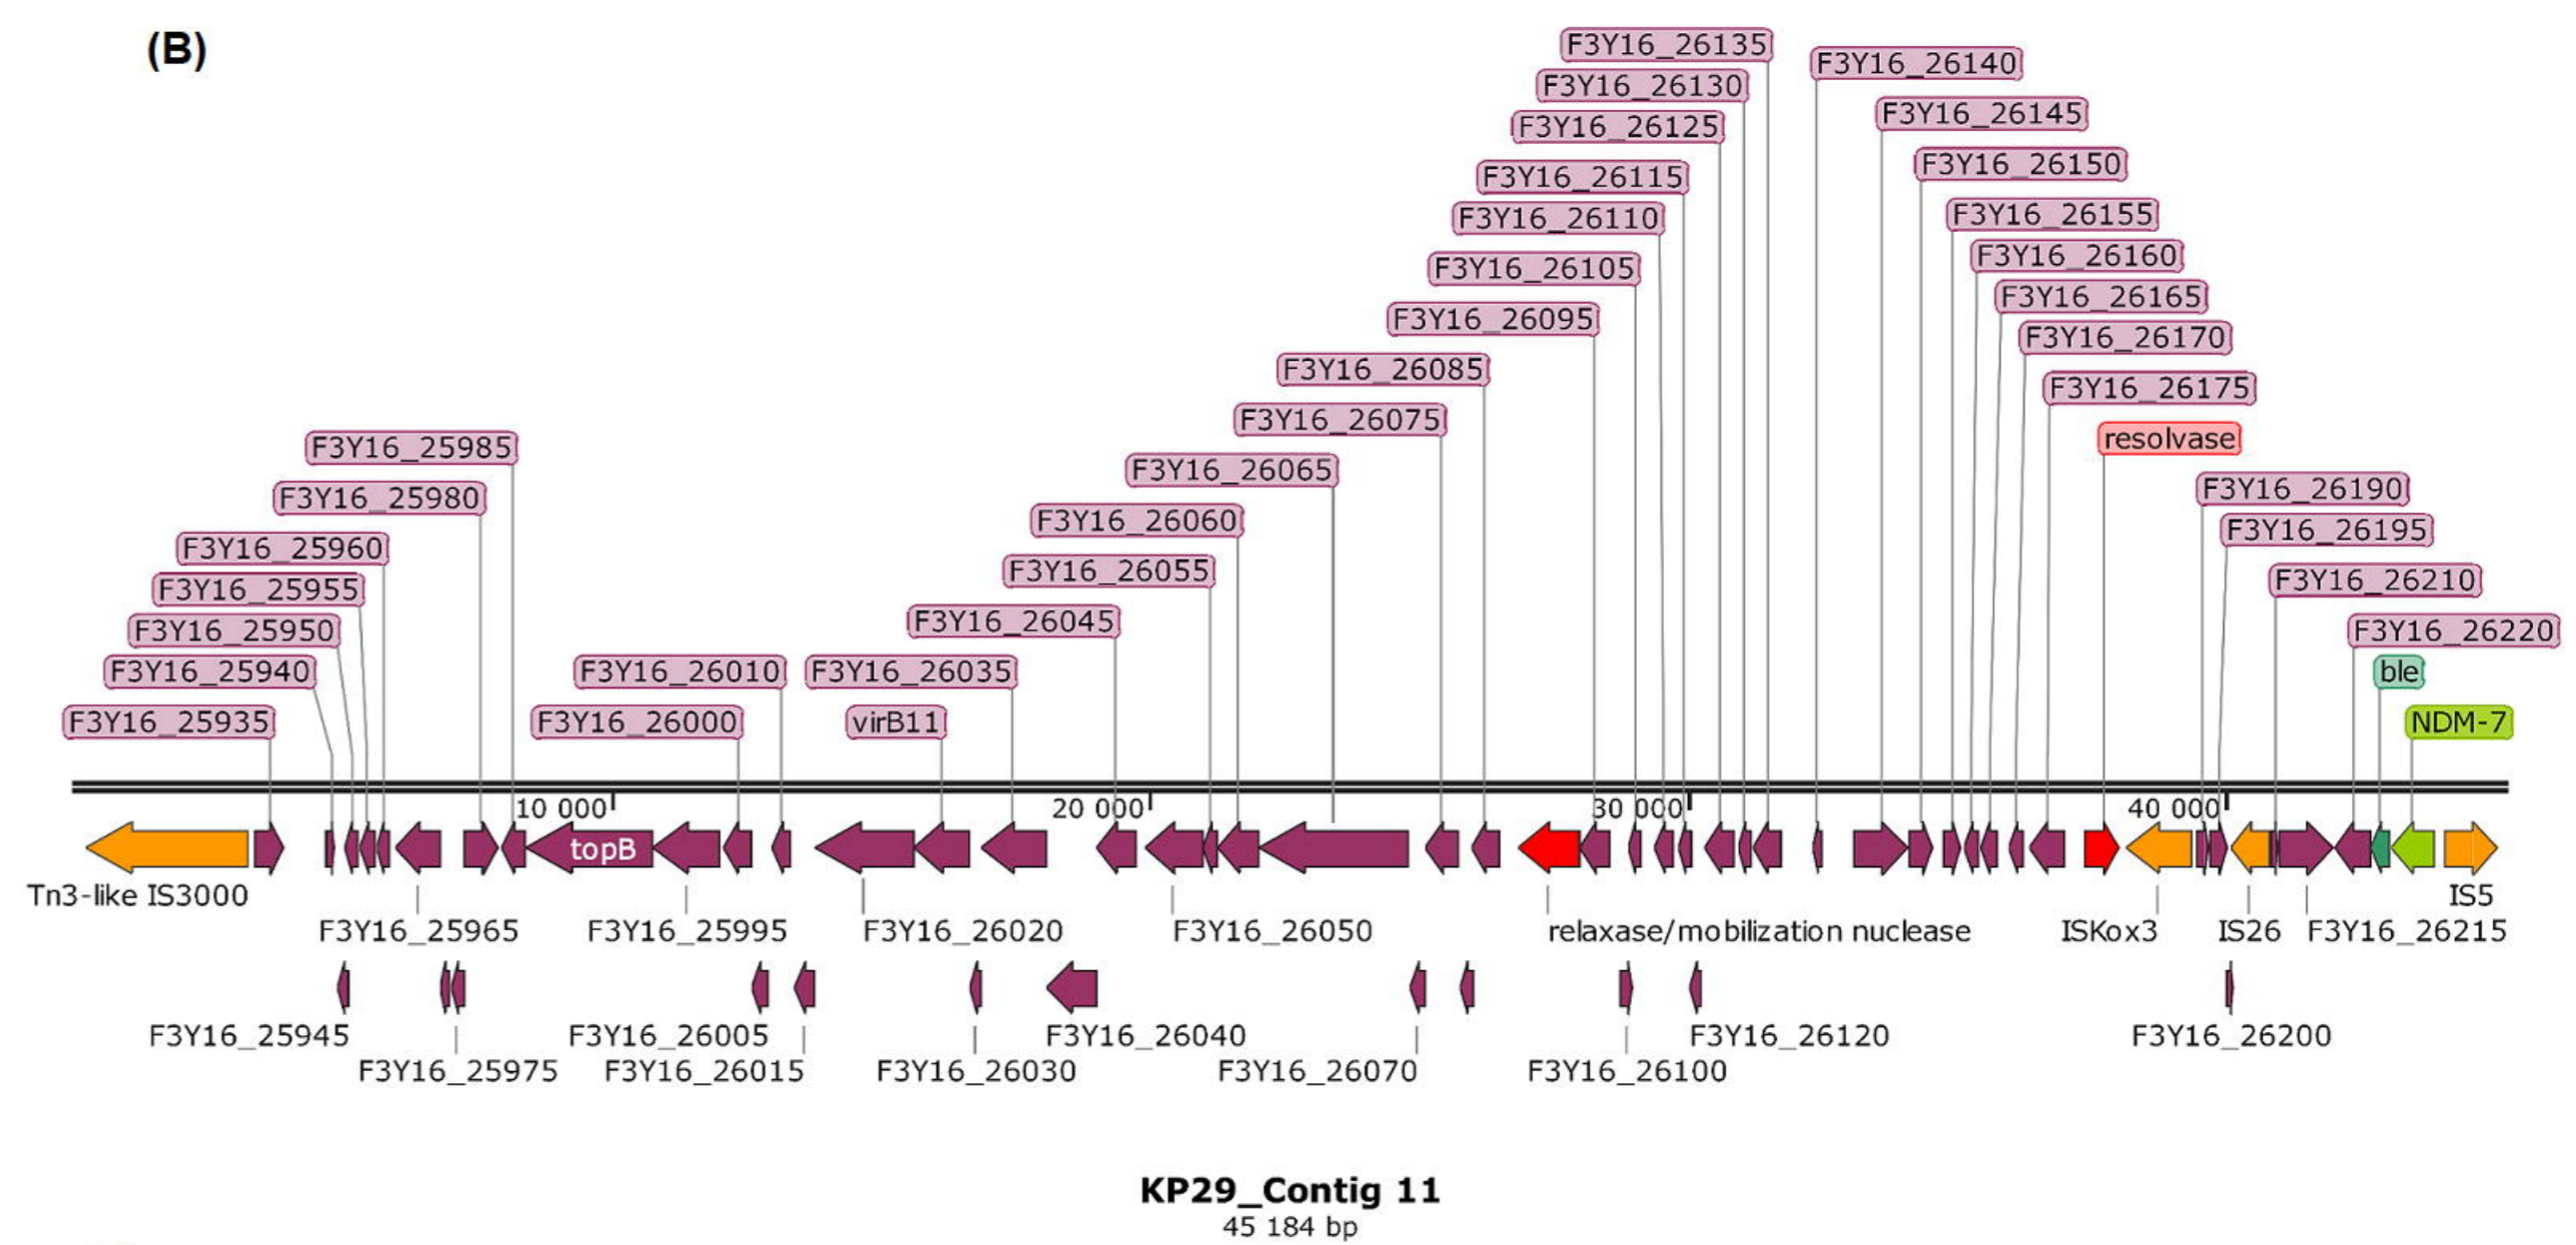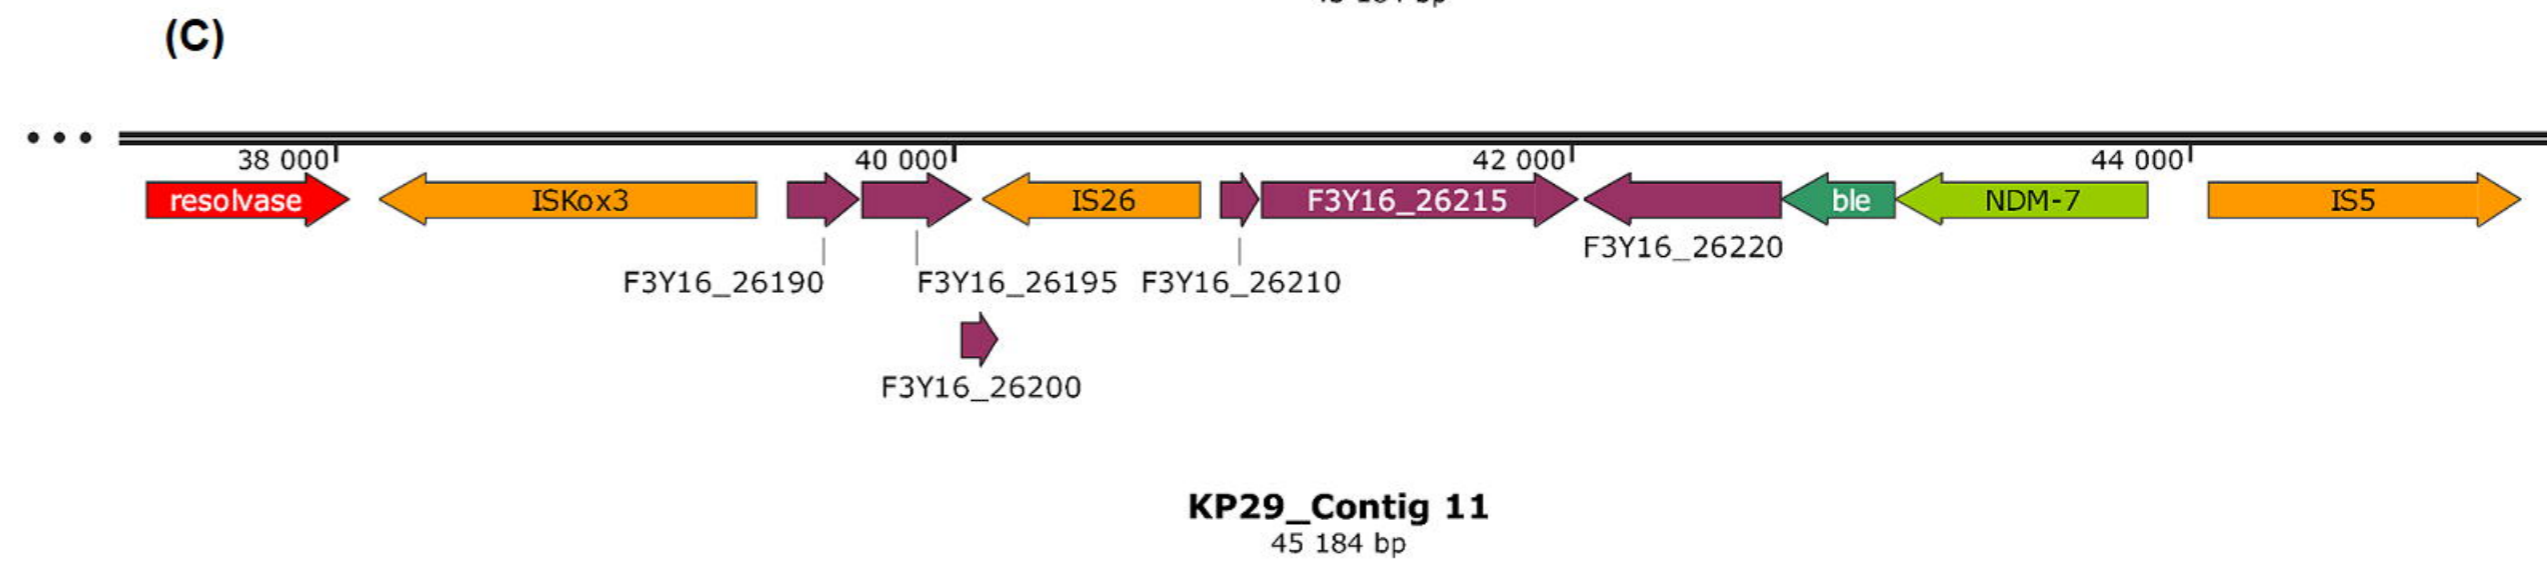

(A)

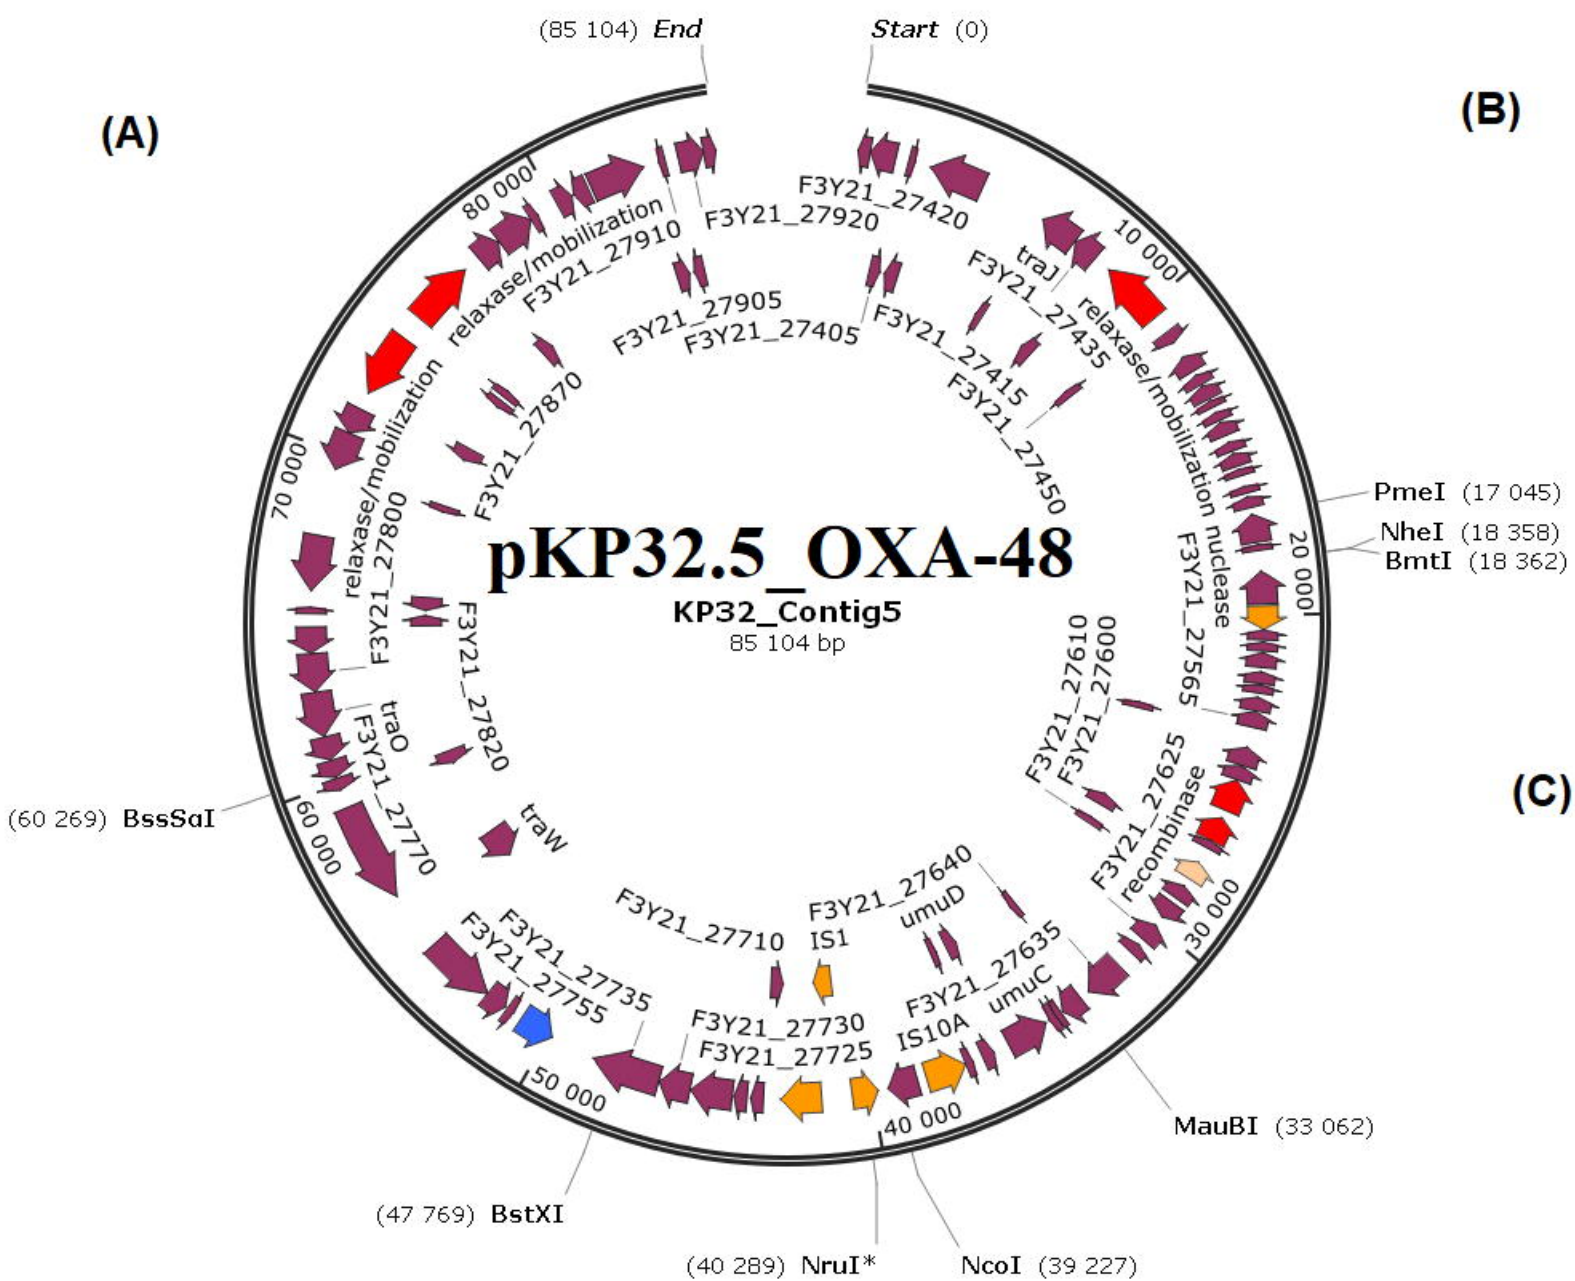

(B)

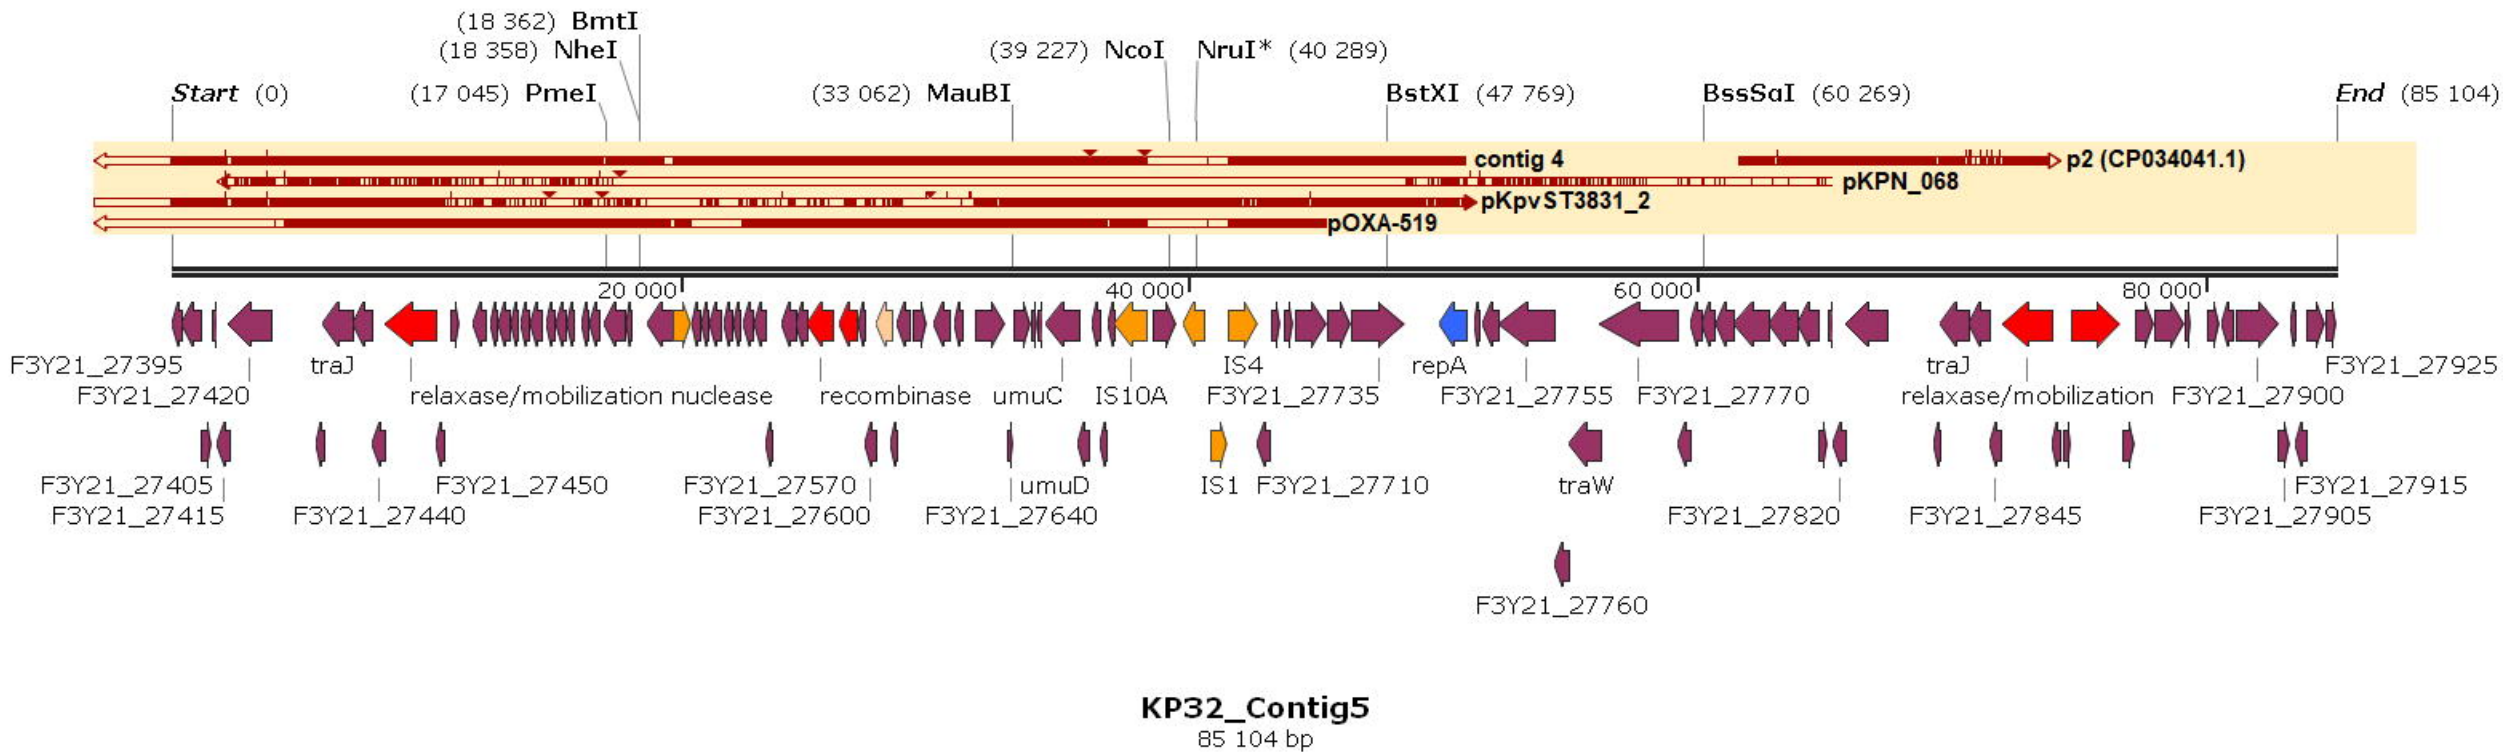

(C)

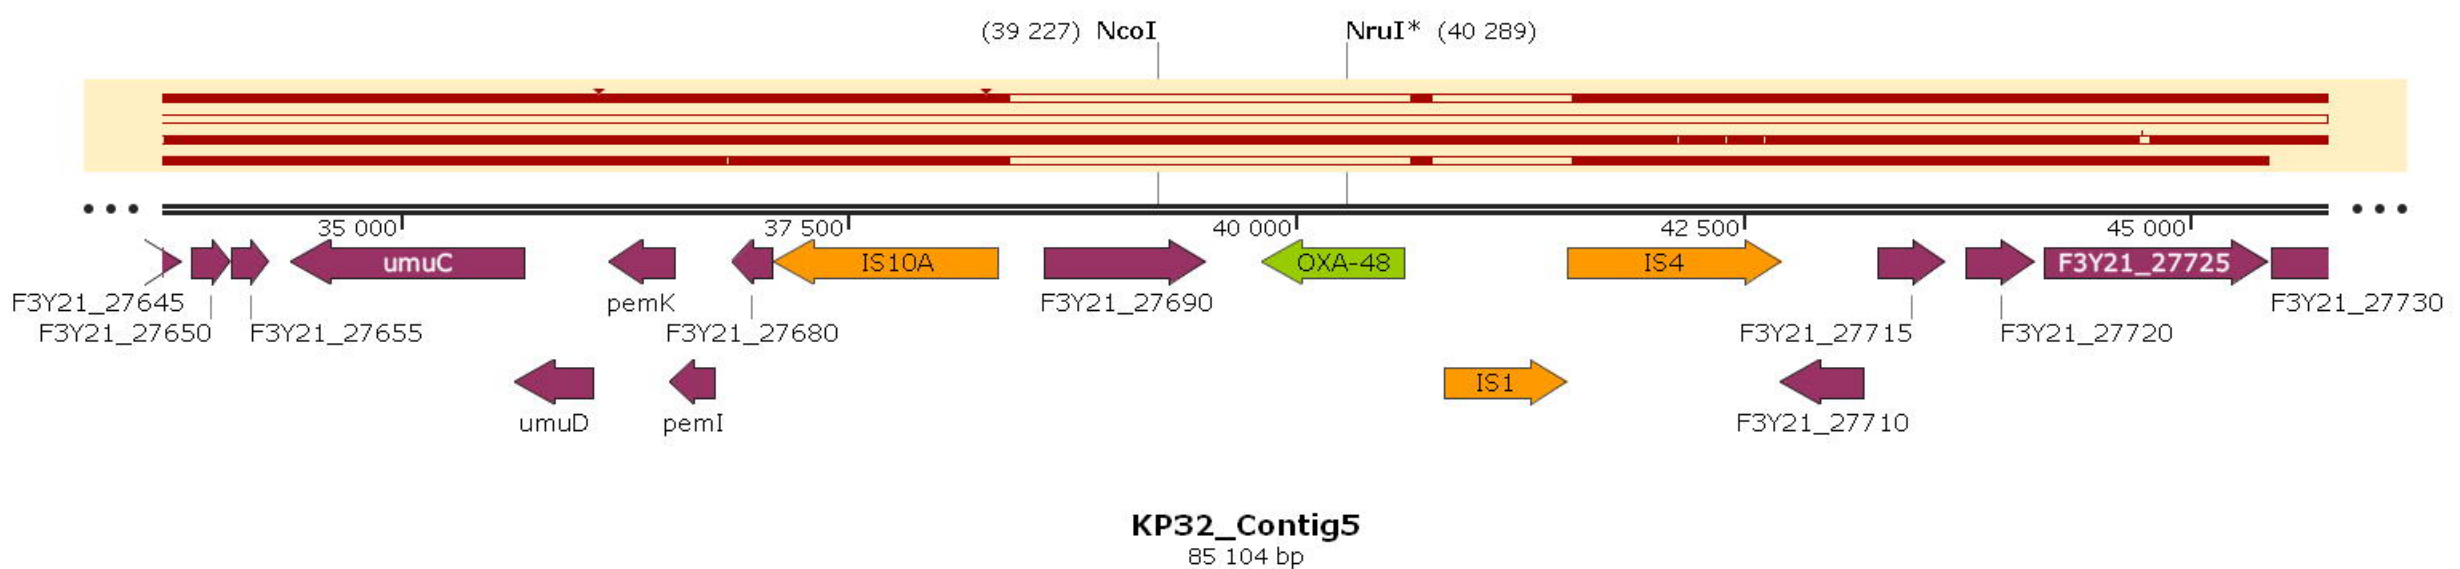

Created with SnapGene®

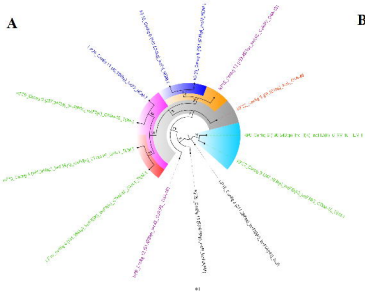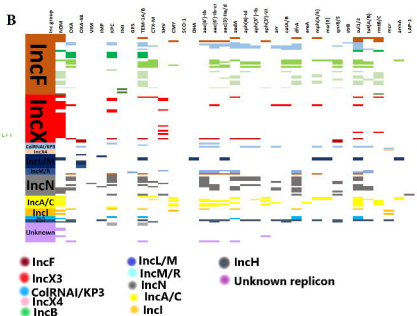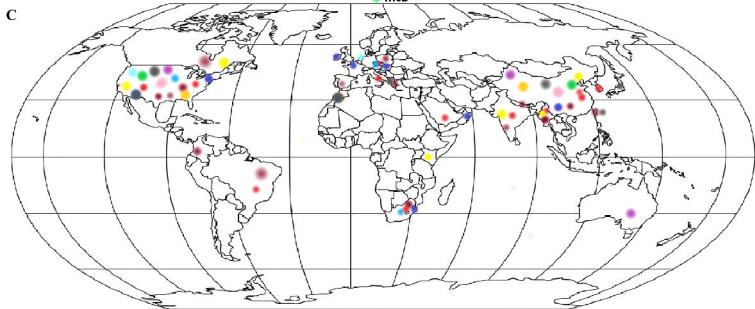

(A)

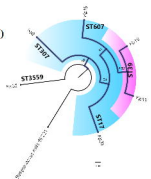

(B)

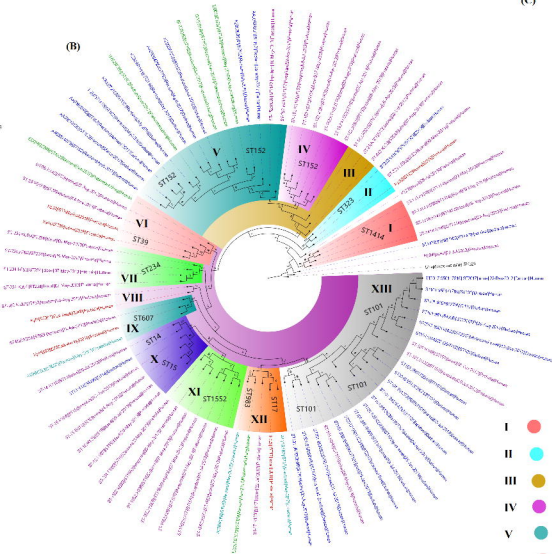

(C)

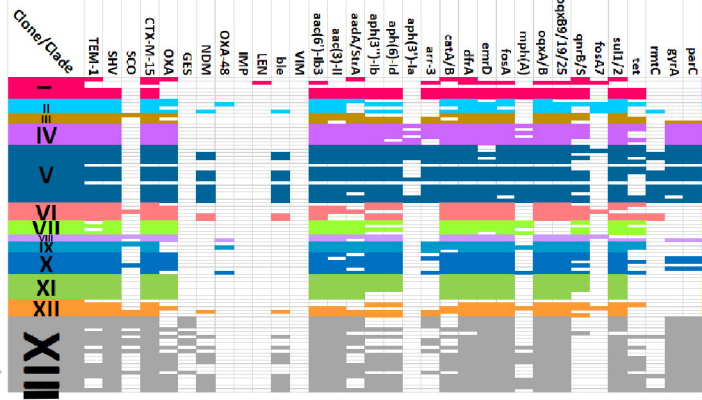

(D)

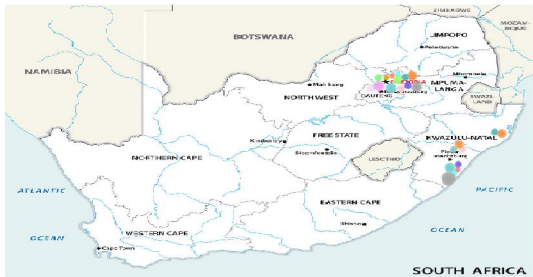

(A)

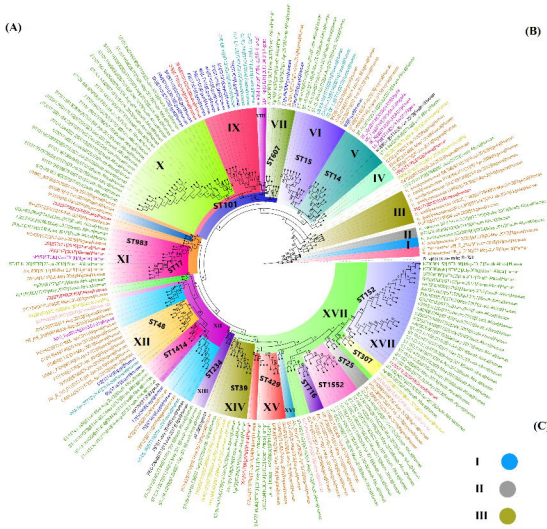

- I ●
- II ●
- III ●
- IV ●
- V ●
- VI ●
- VII ●
- VIII ●
- IX ●

(B)

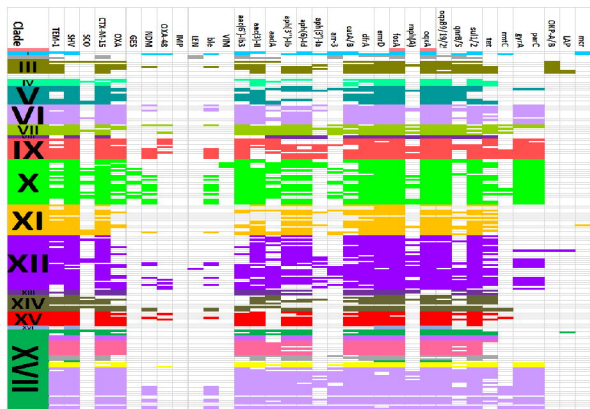

(C)

- X ●
- XI ●
- XII ●
- XIII ●
- XIV ●
- XV ●
- XVI ●
- XVII ●

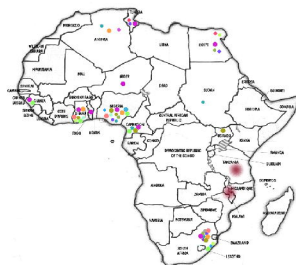



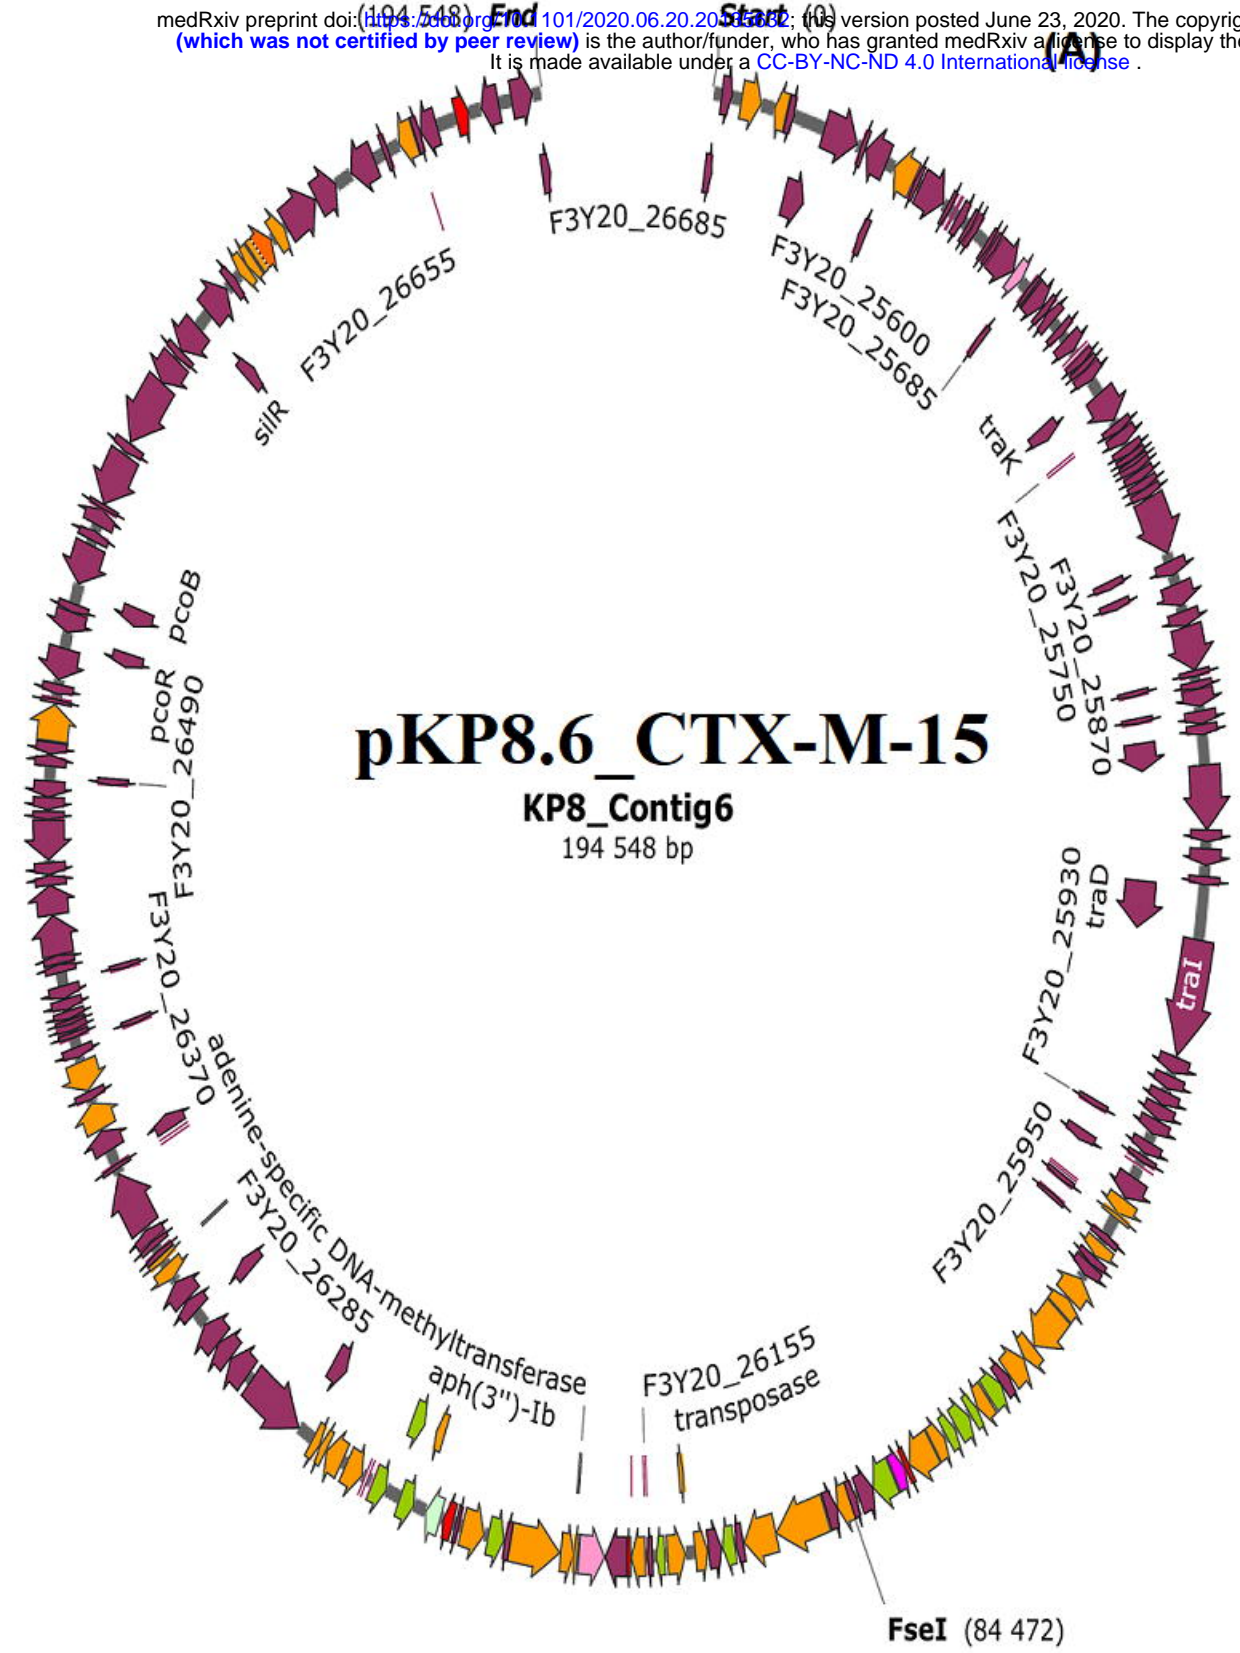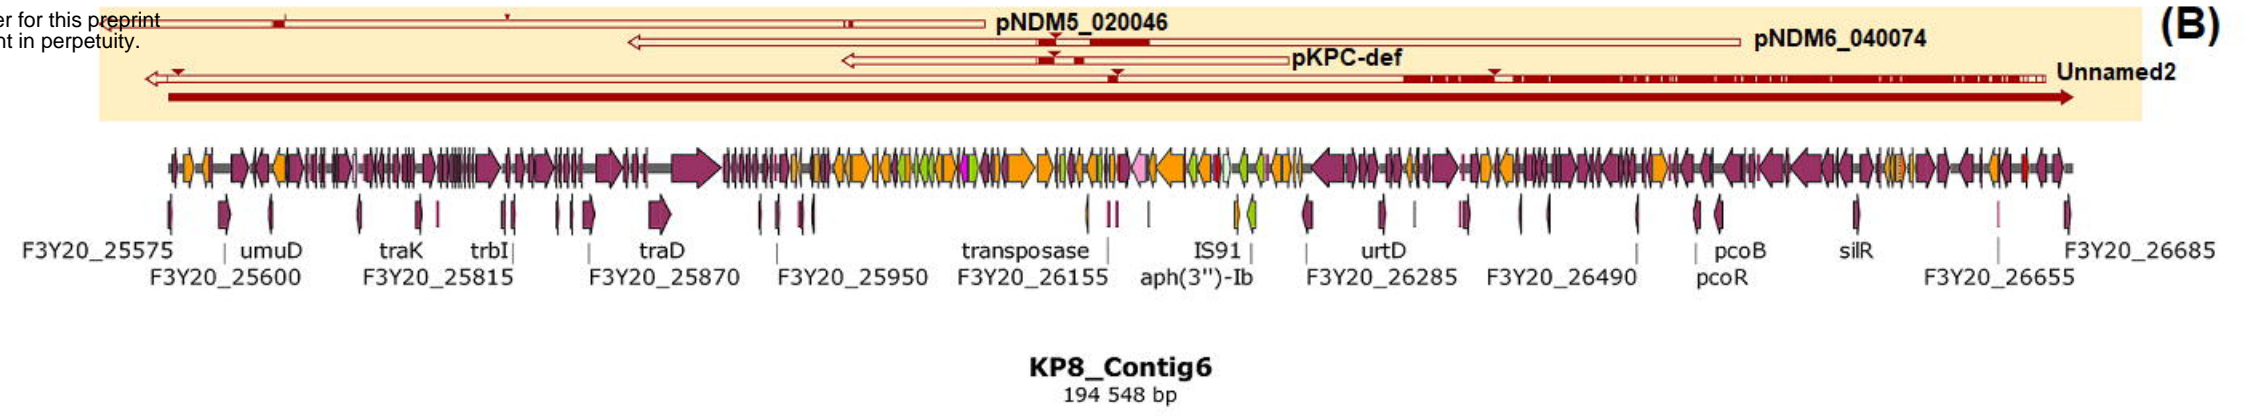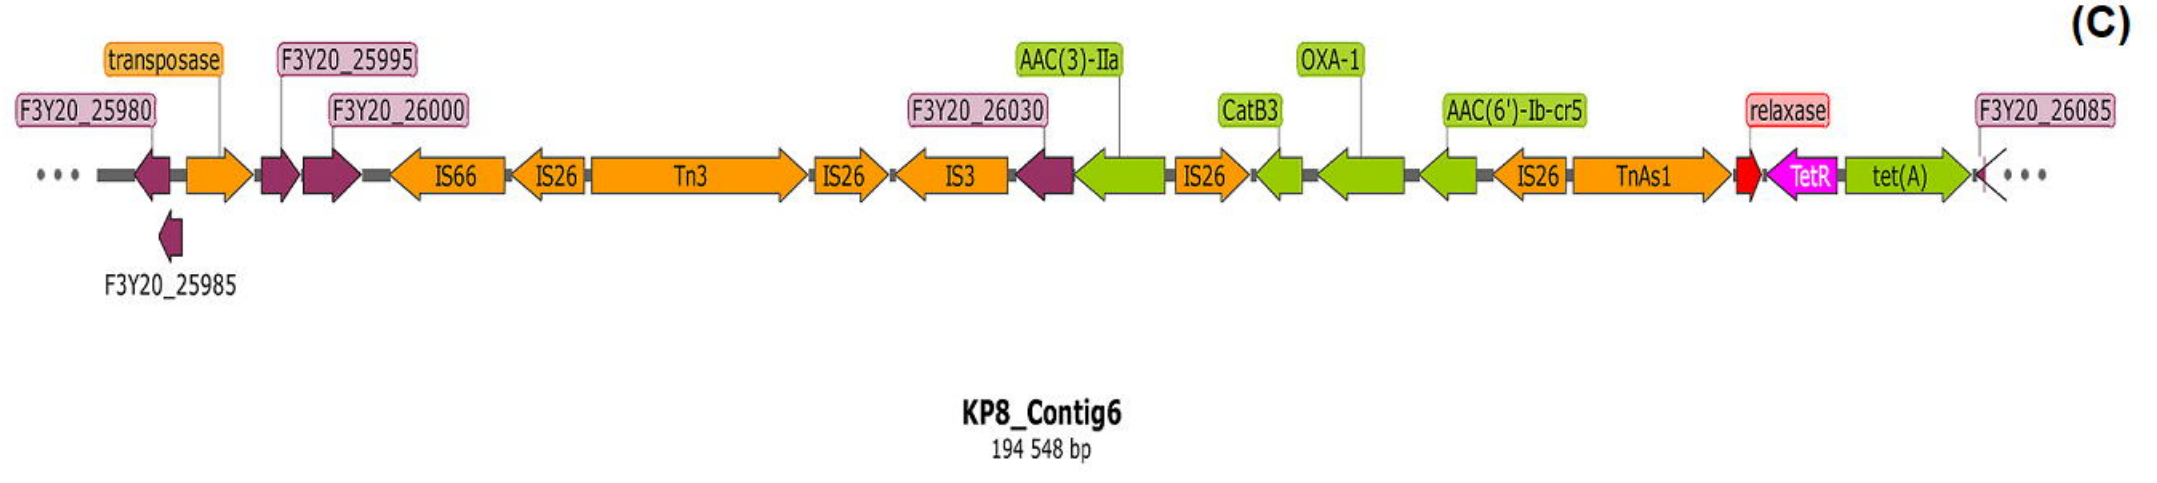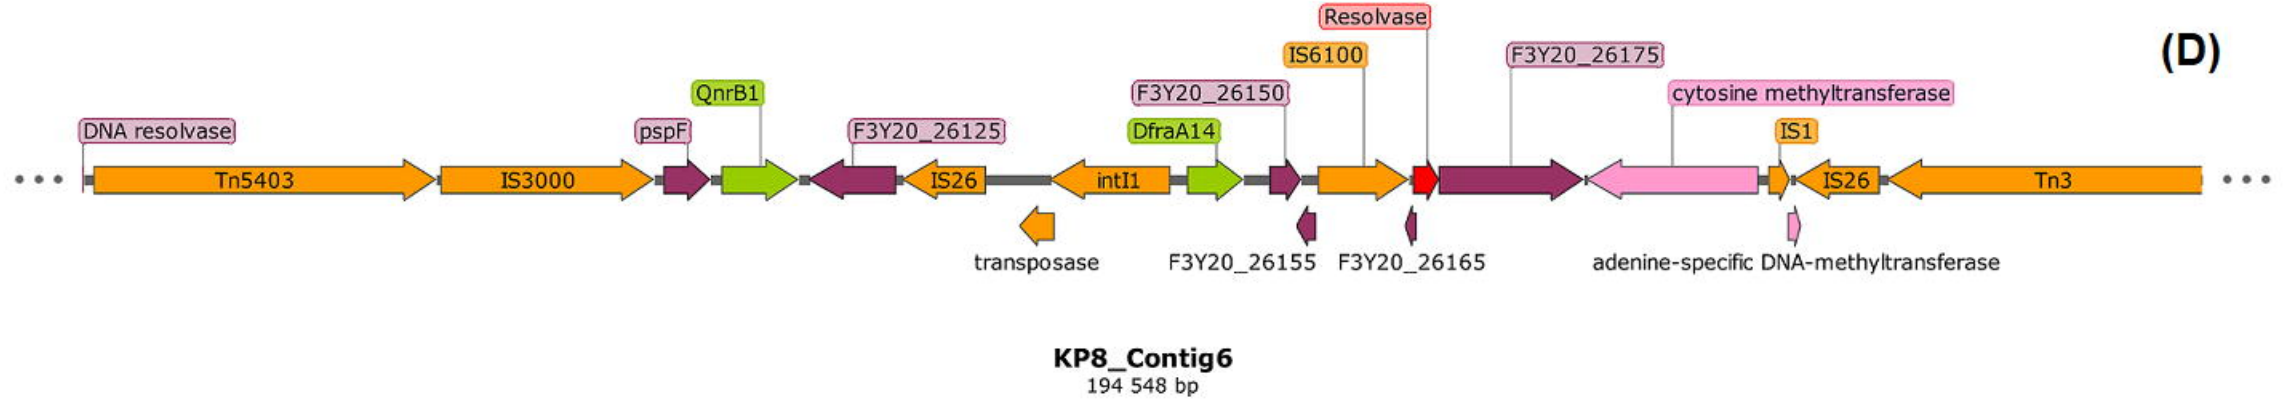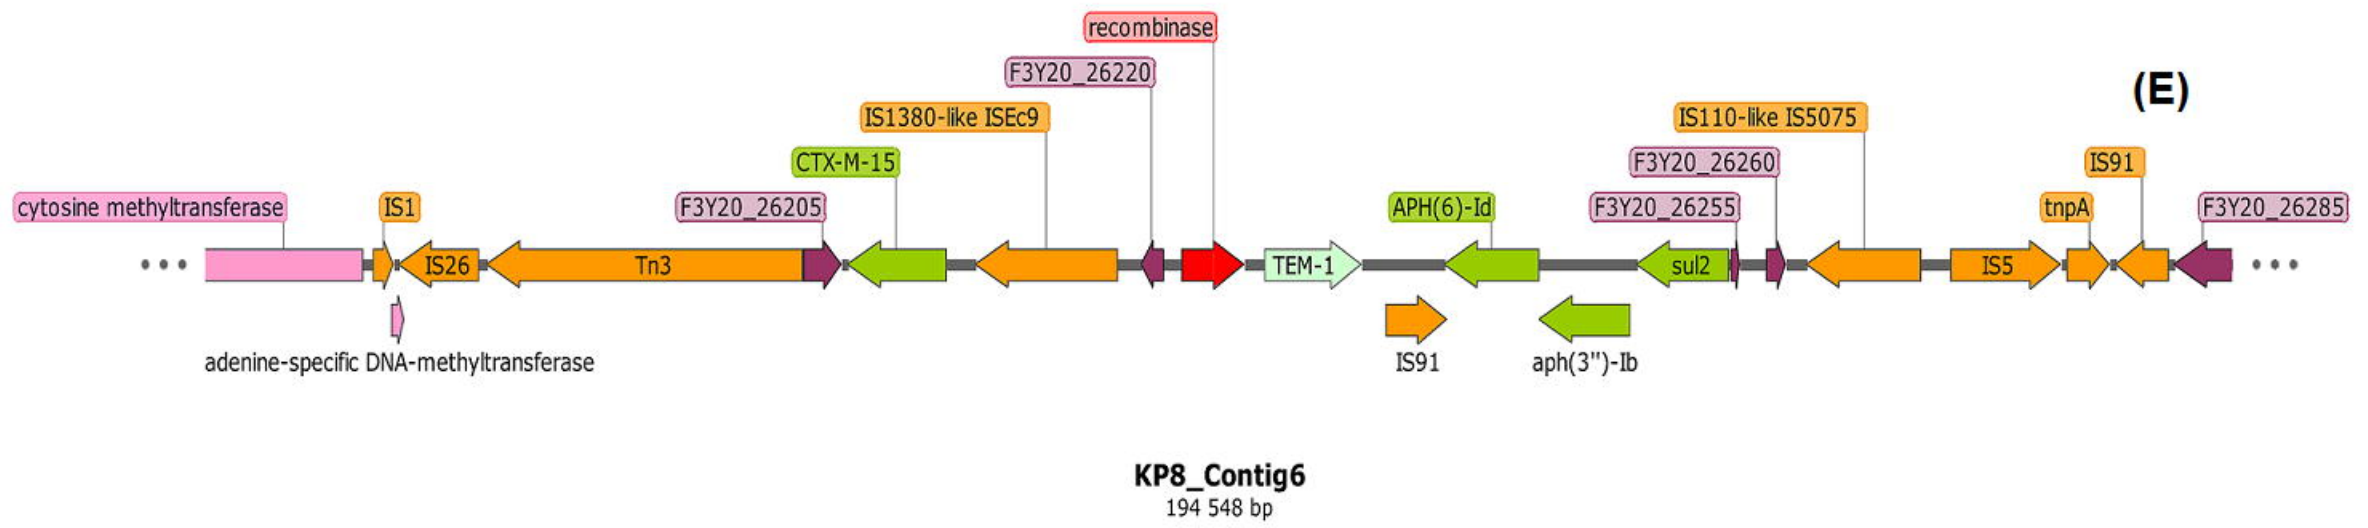

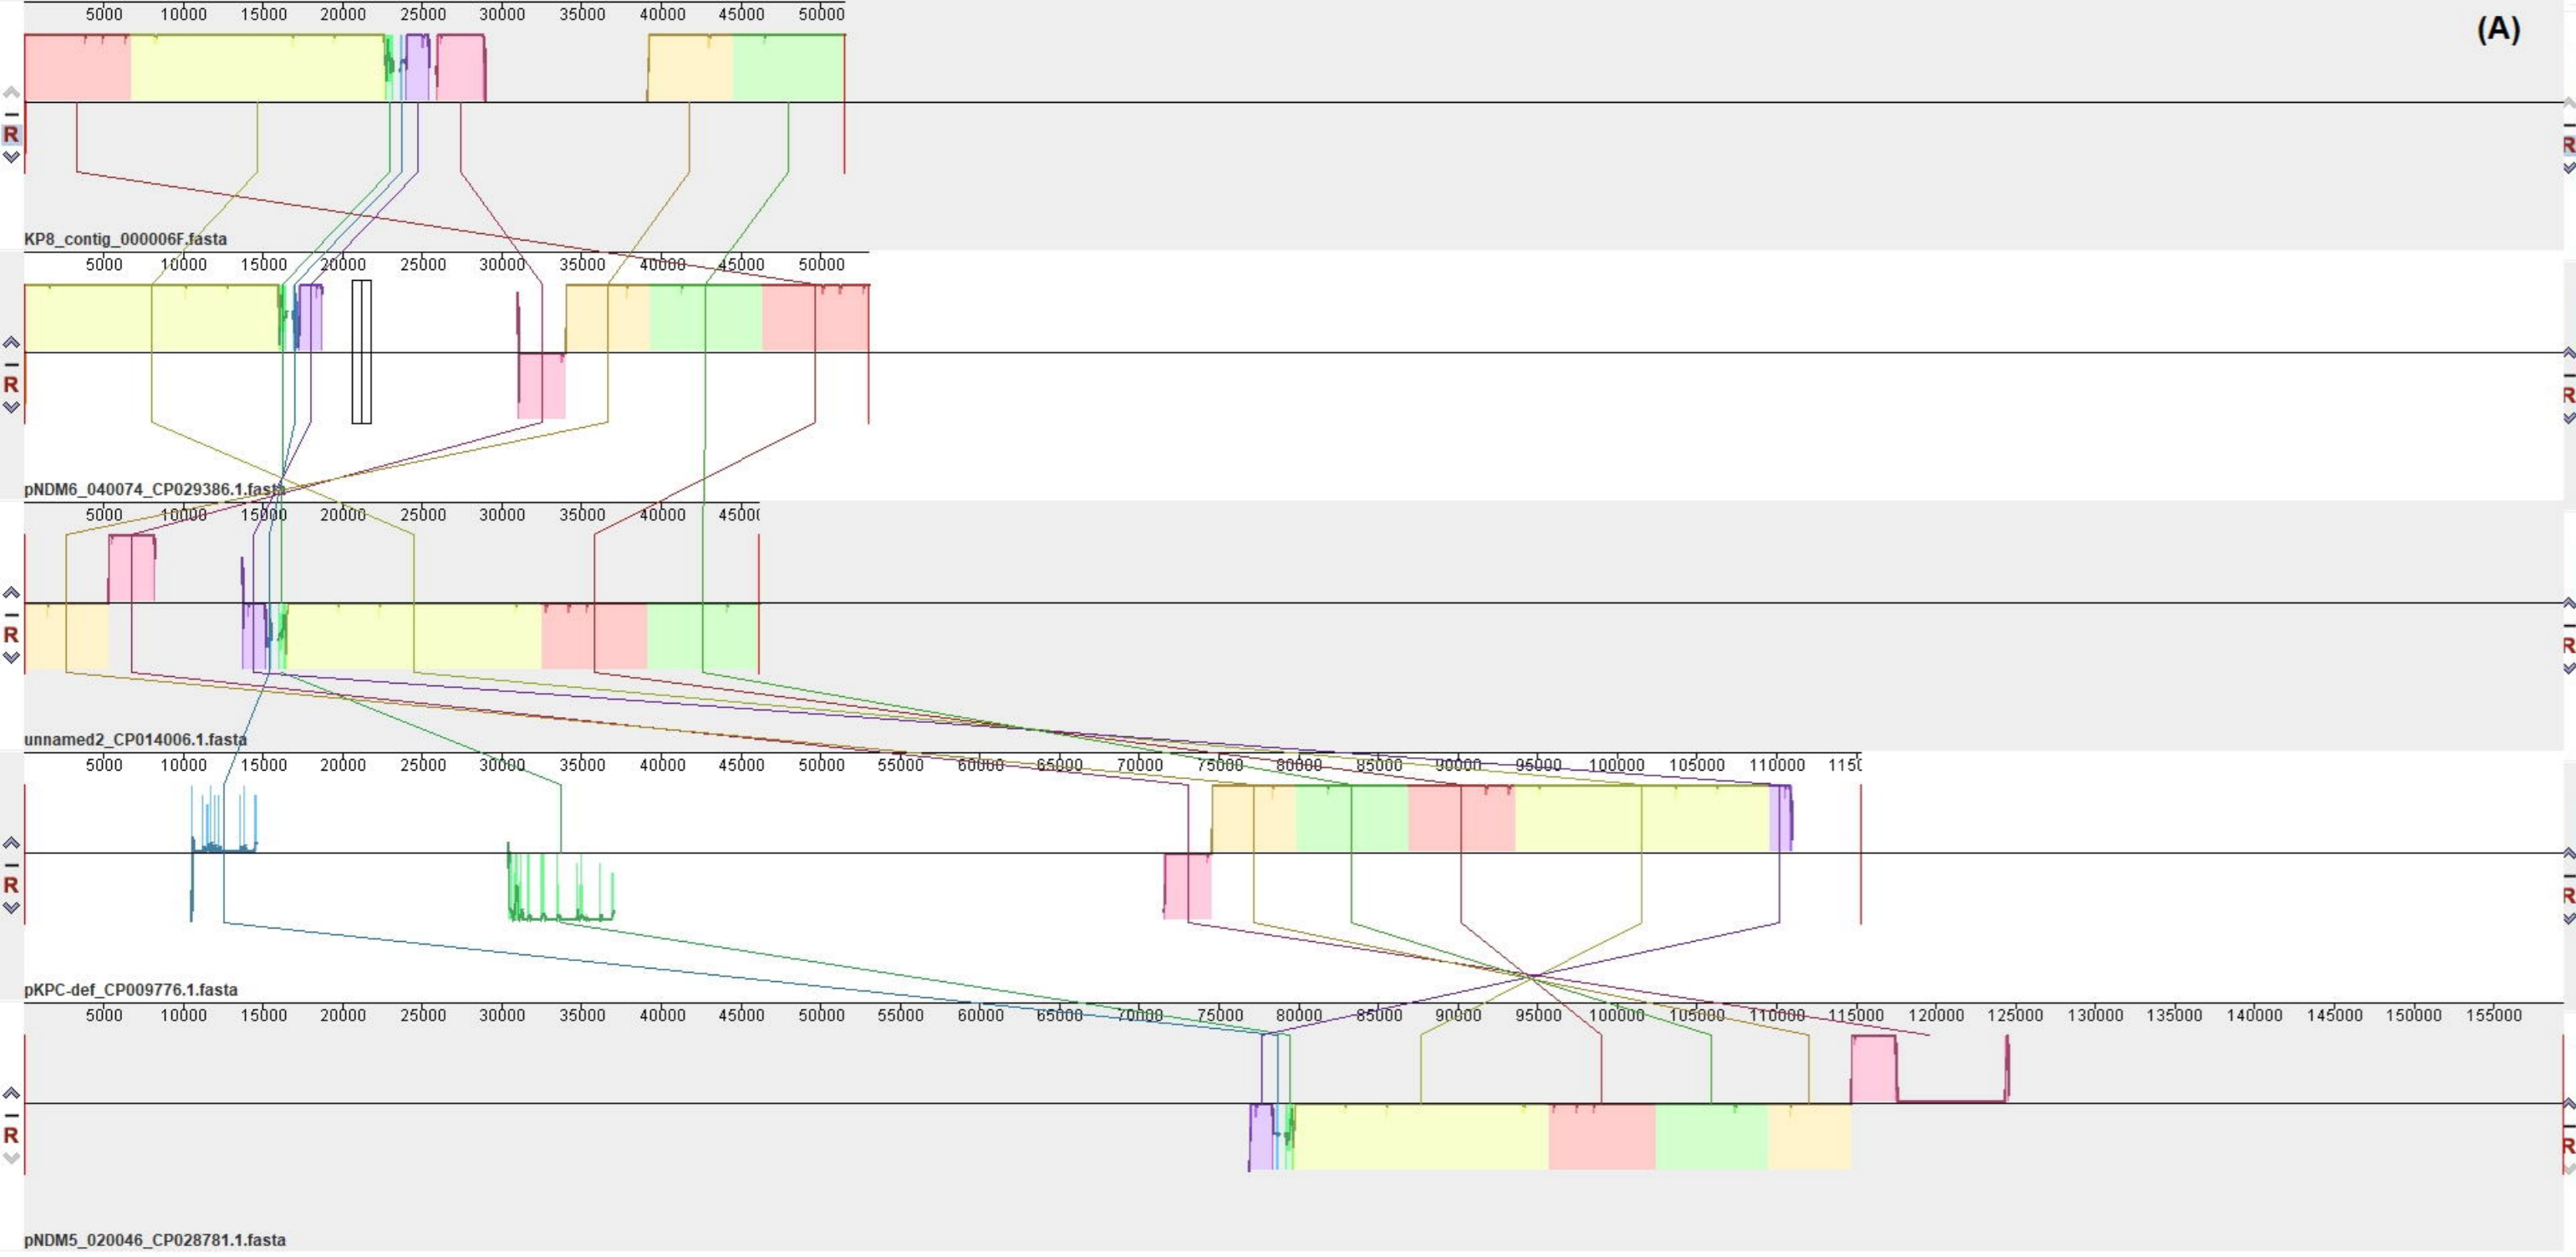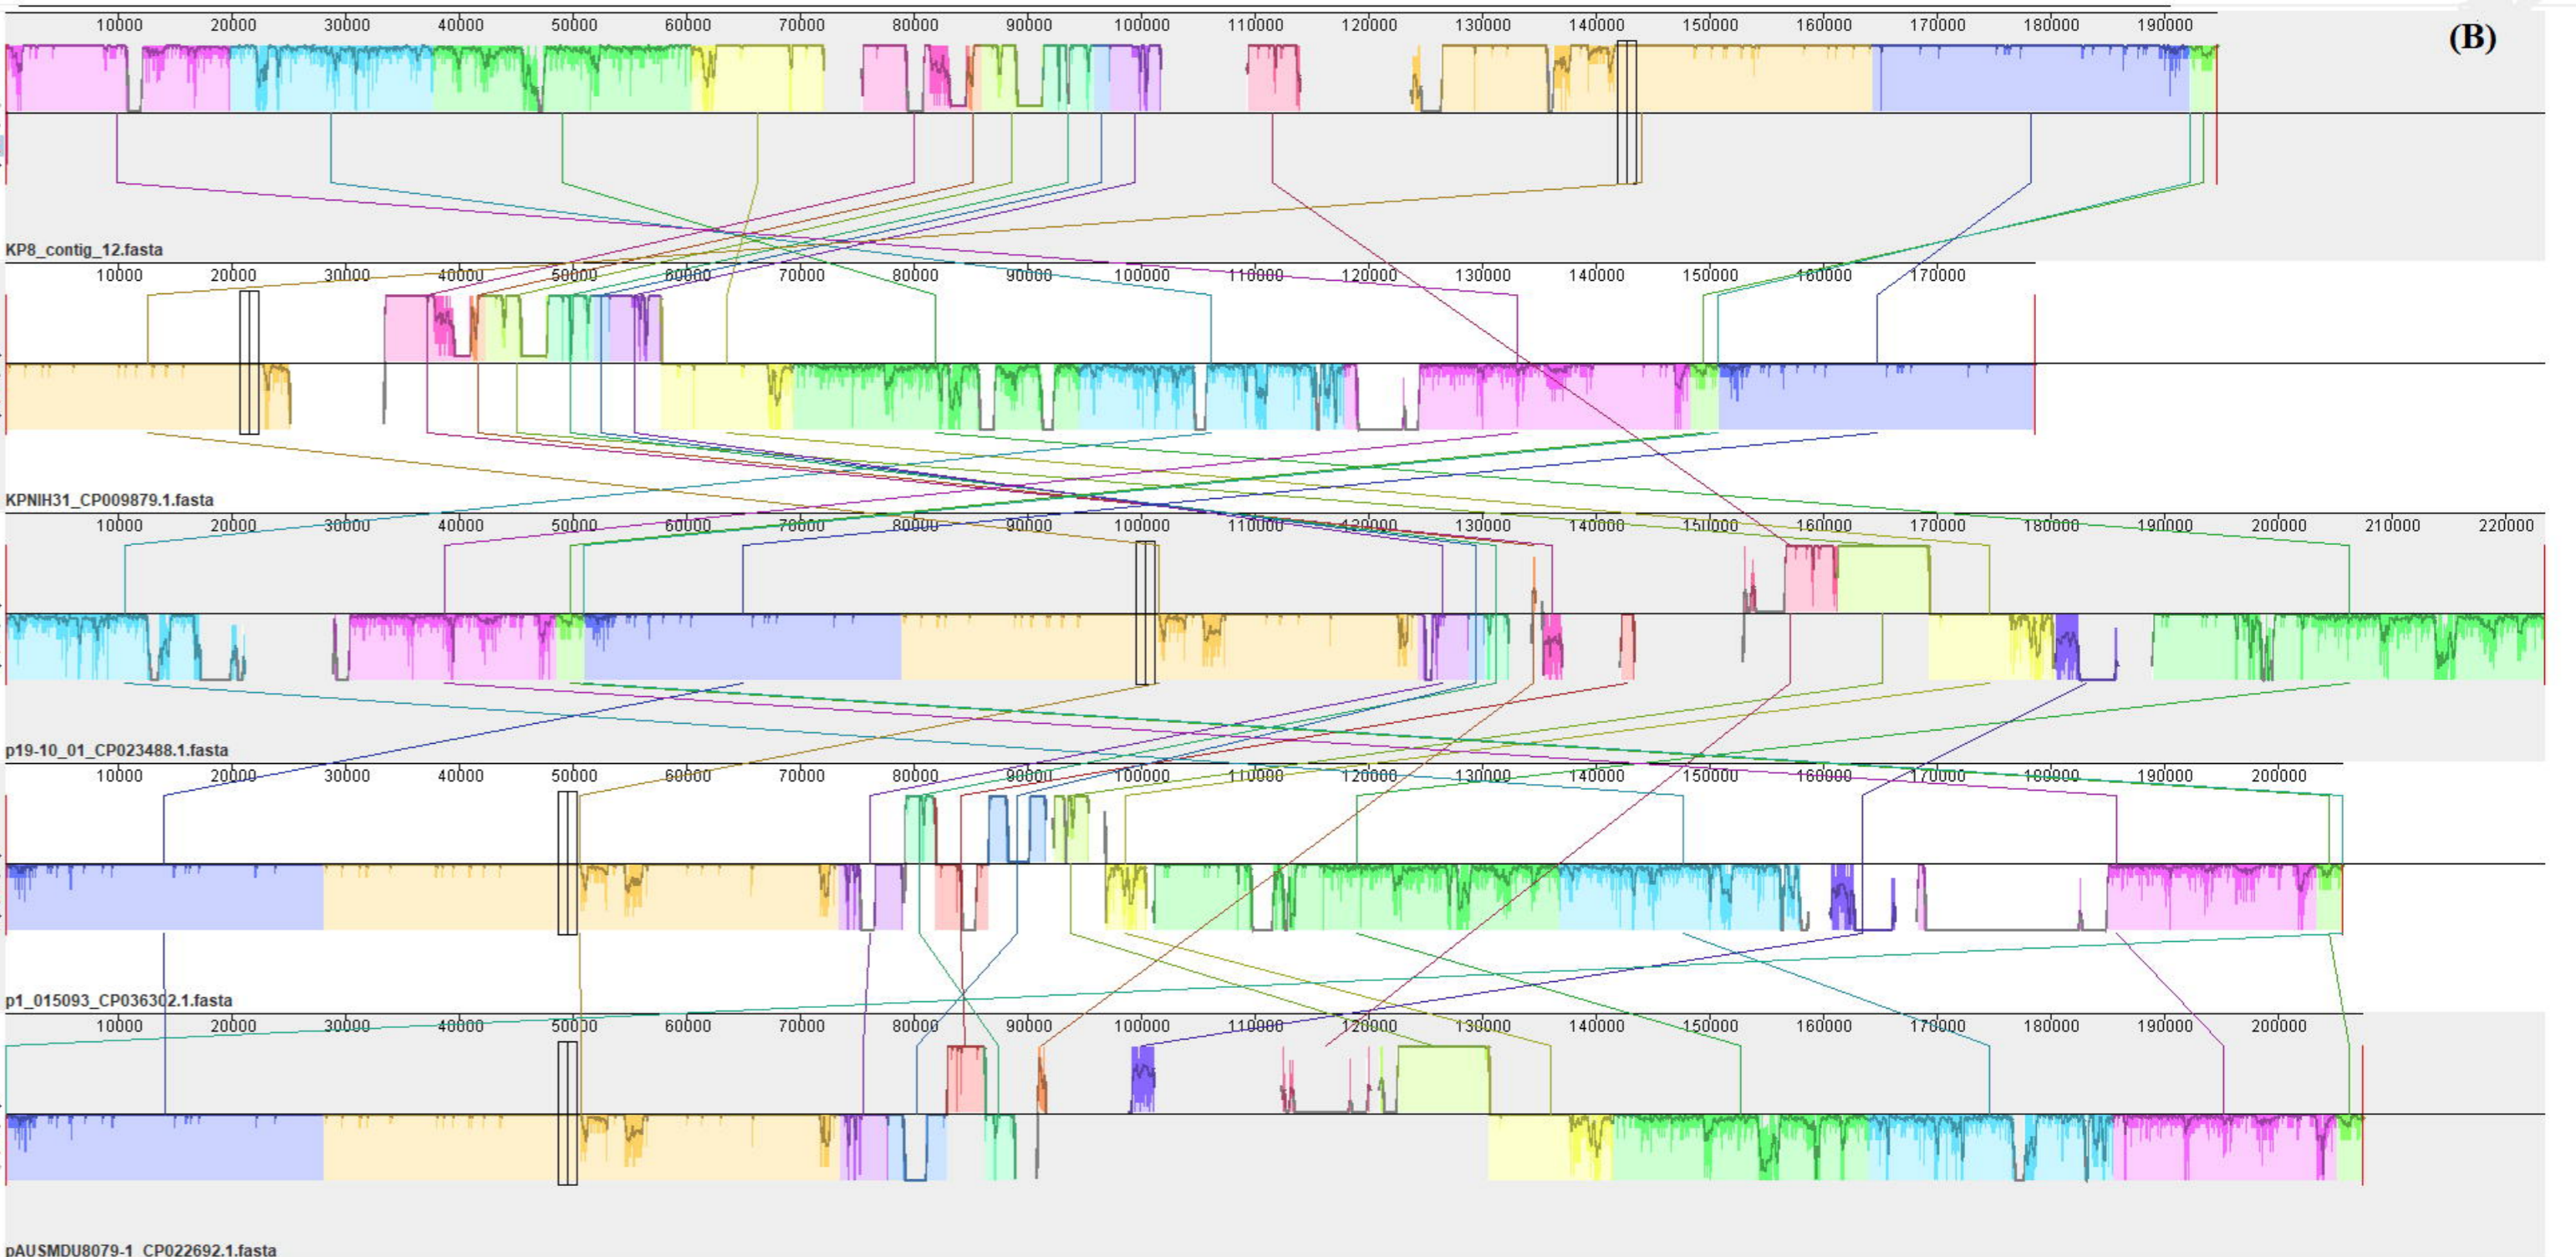



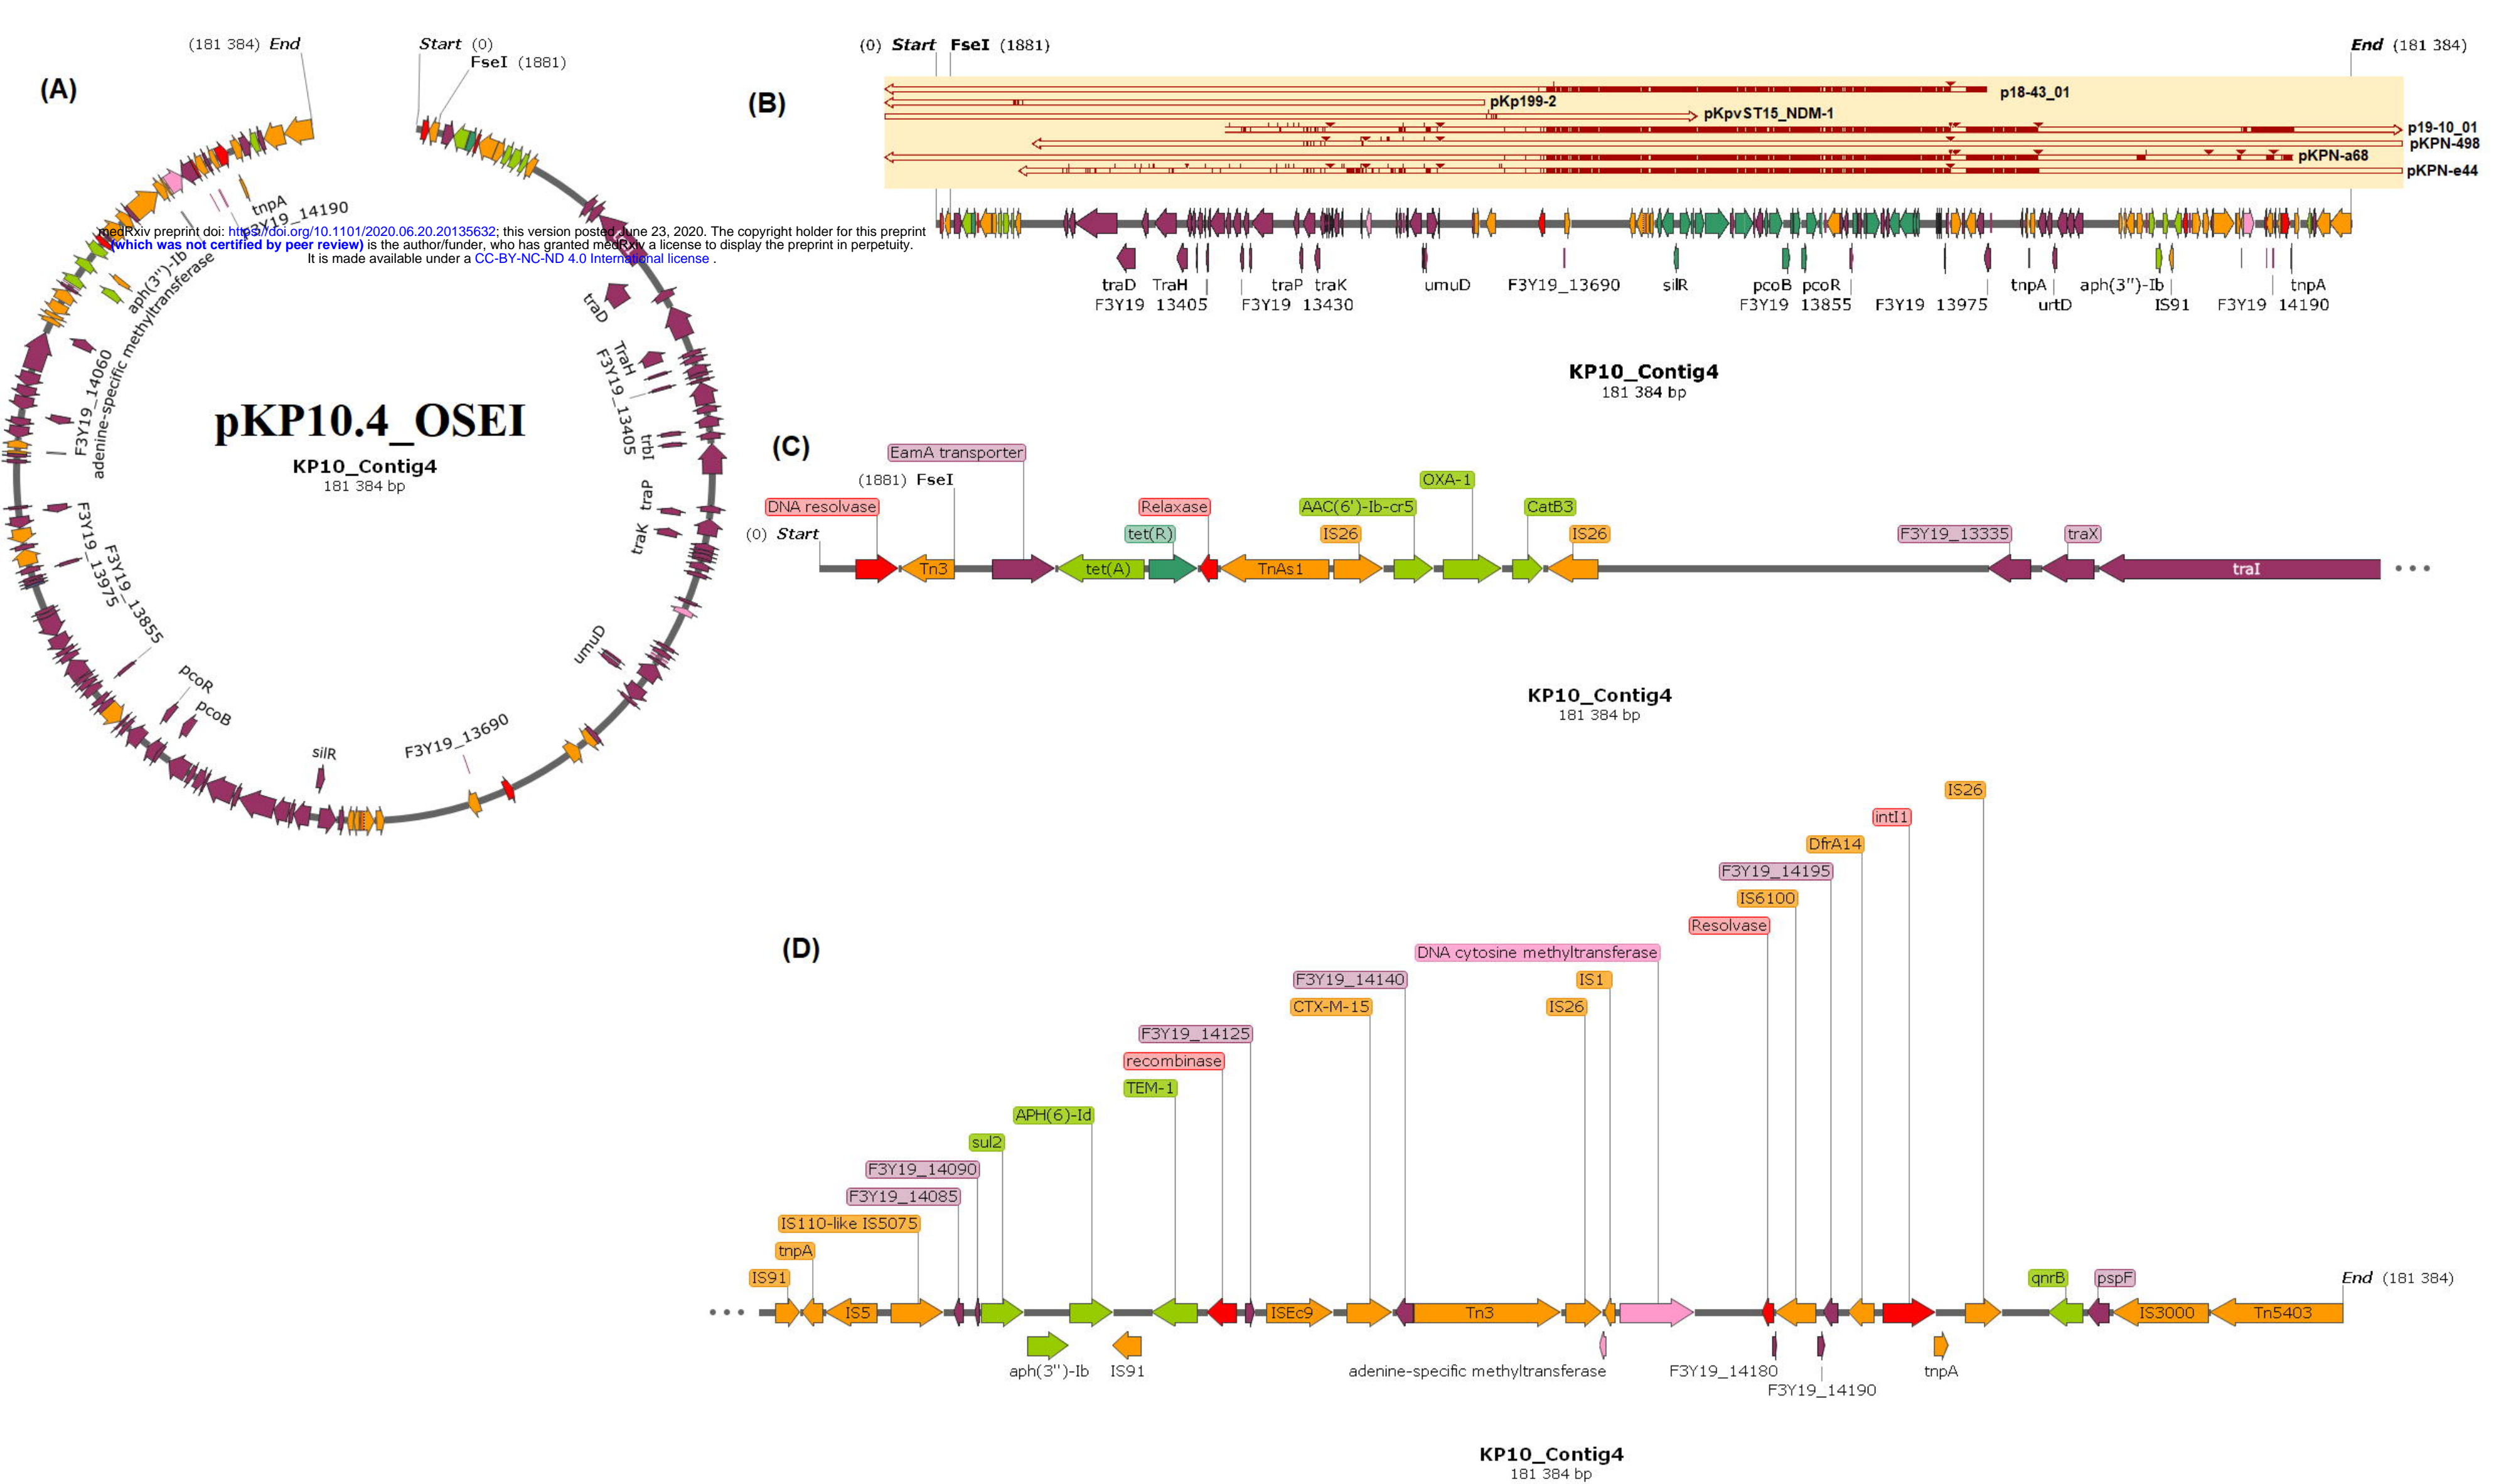

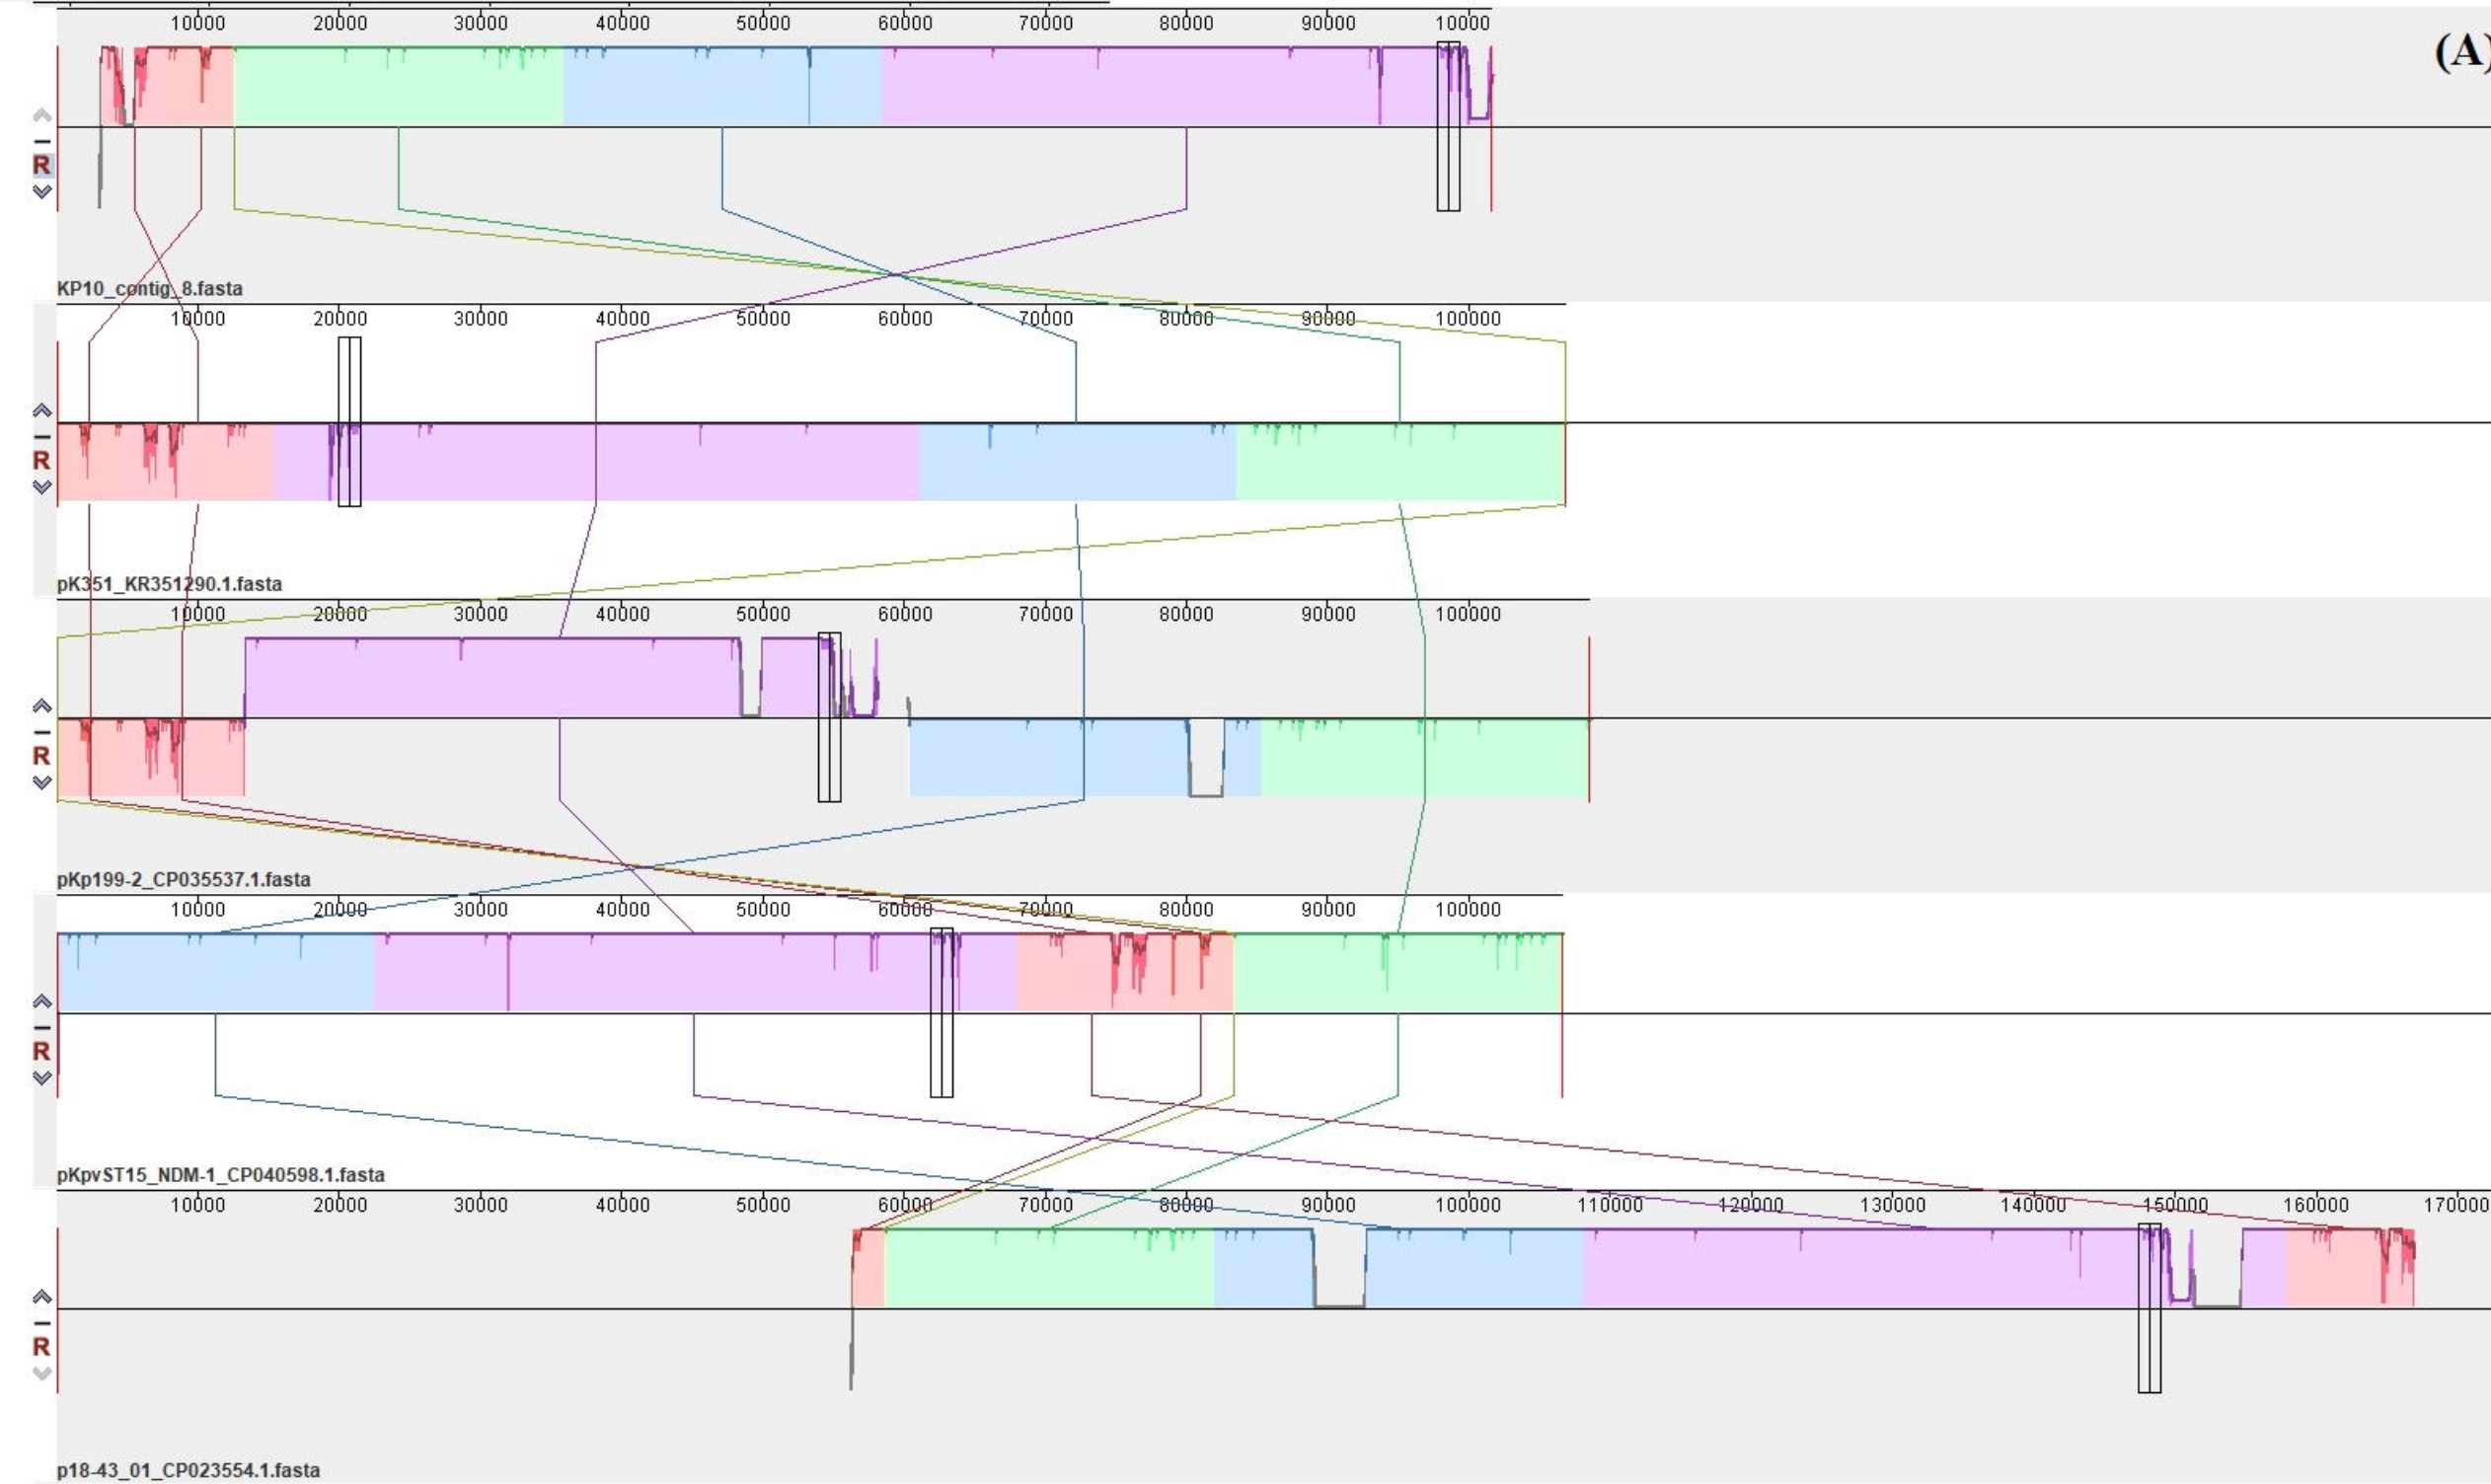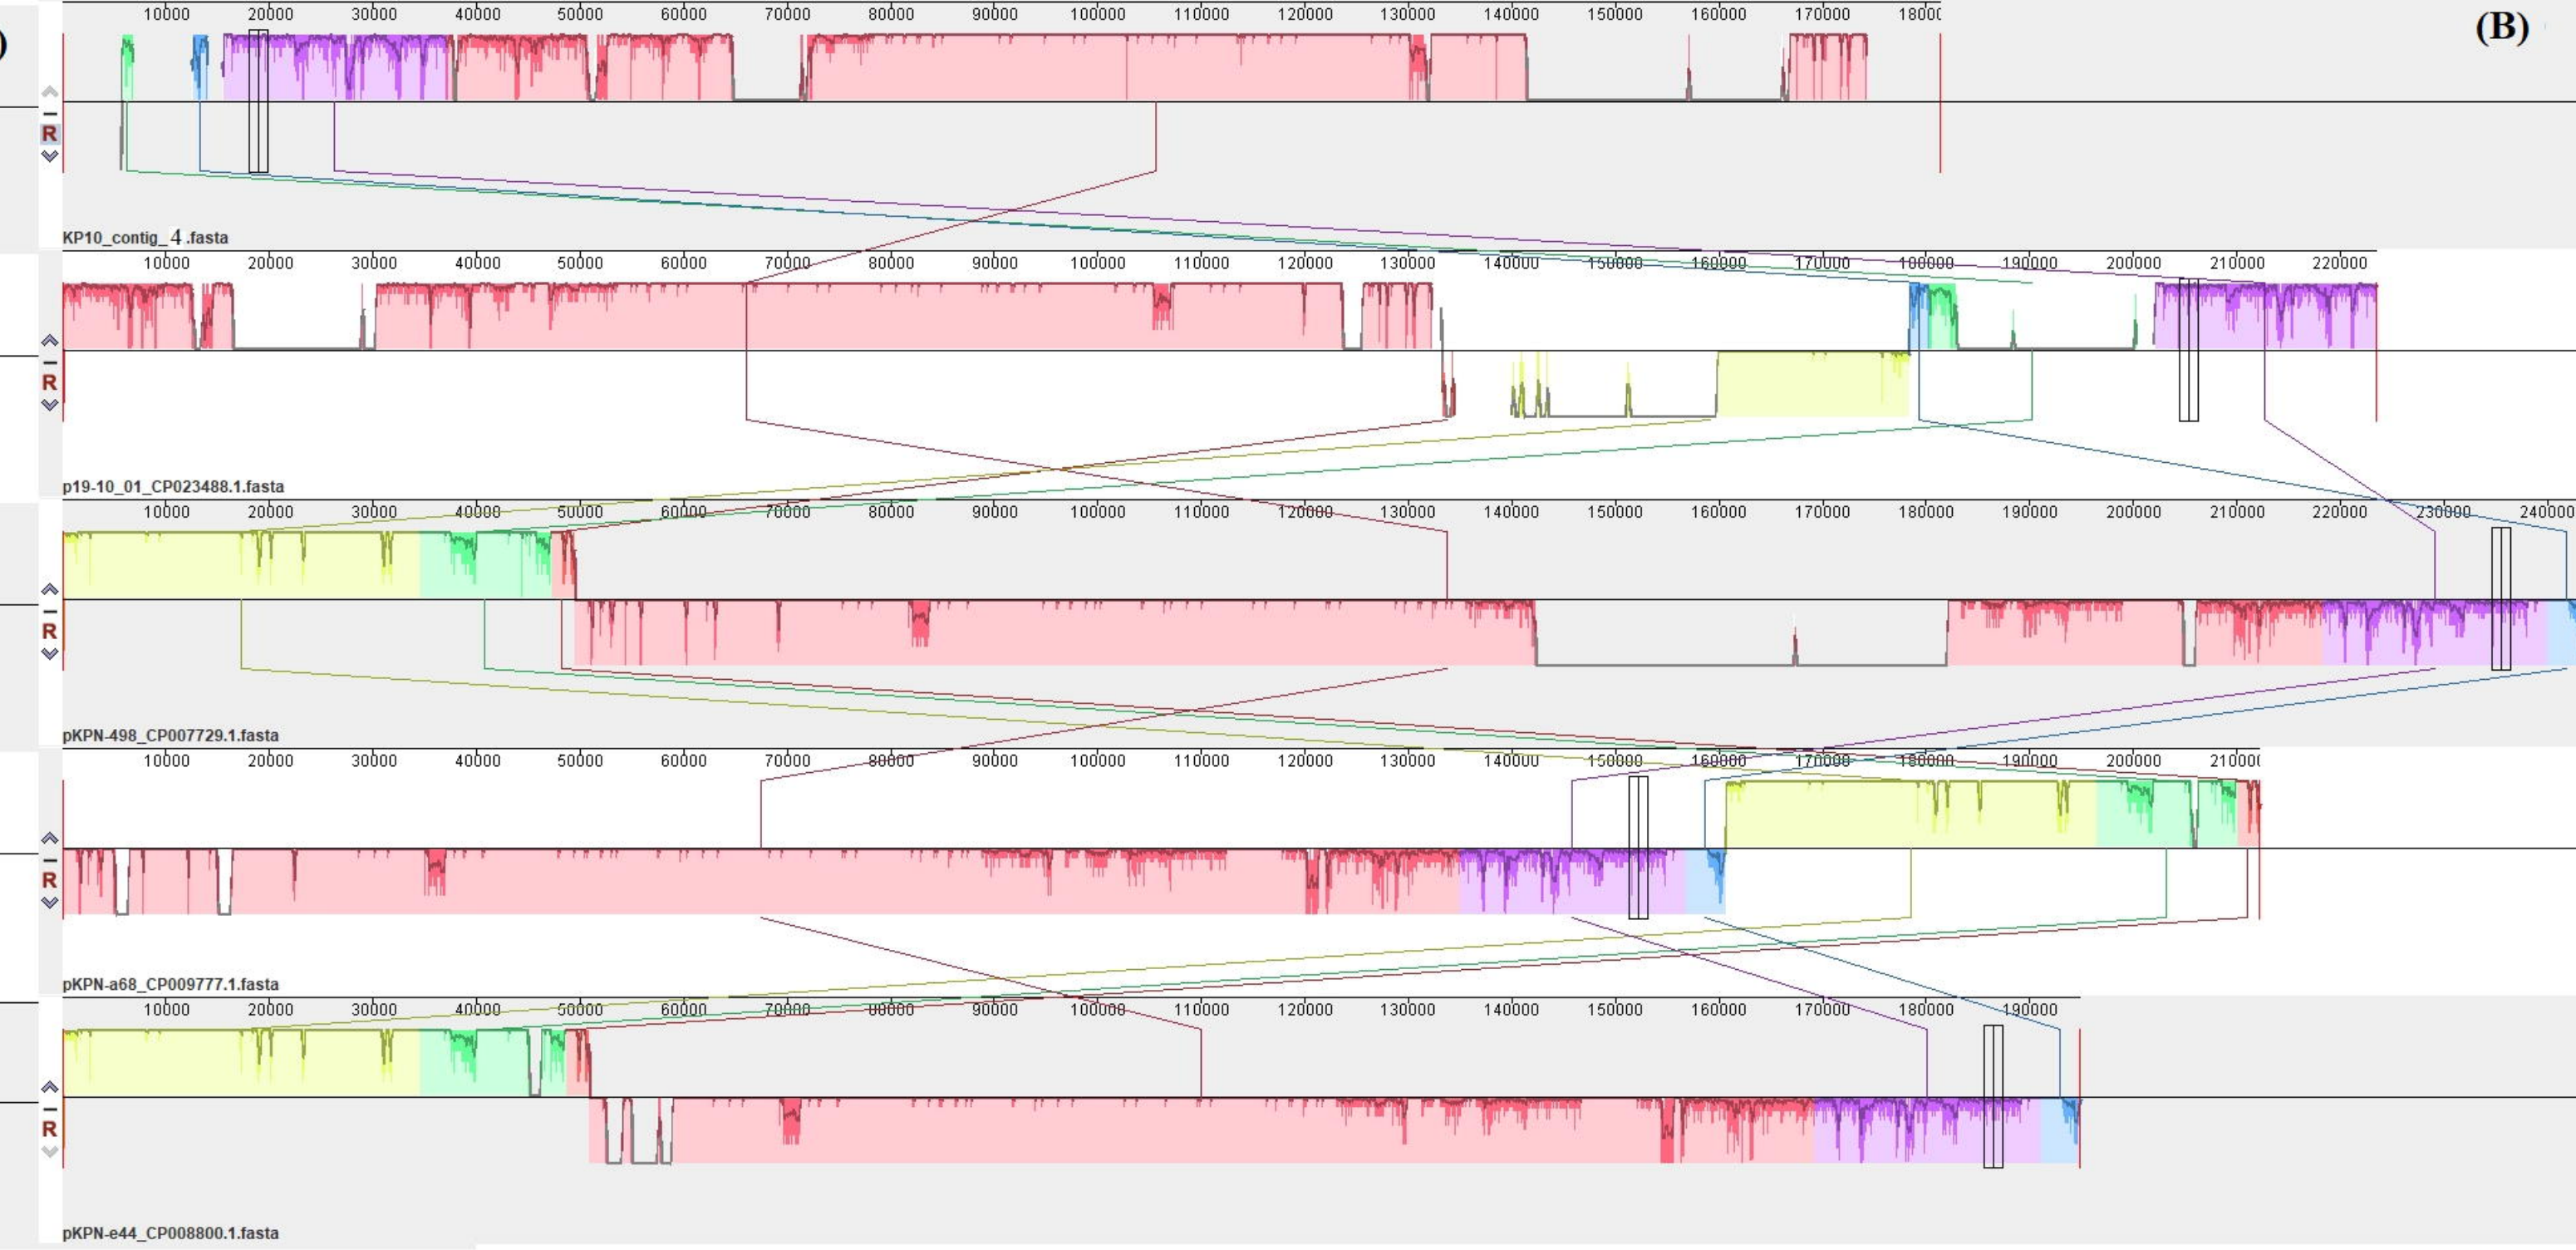

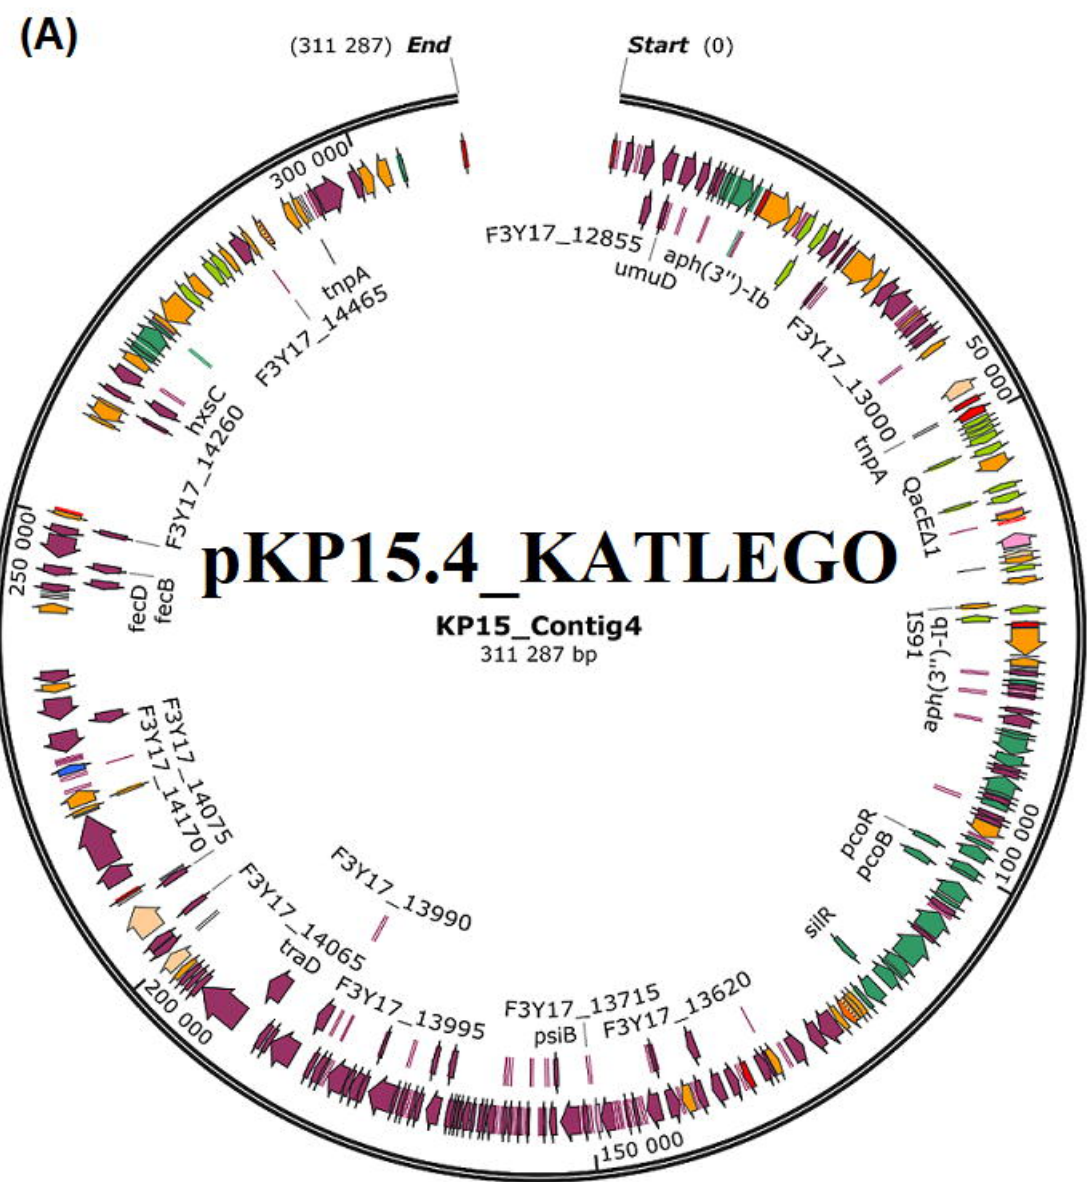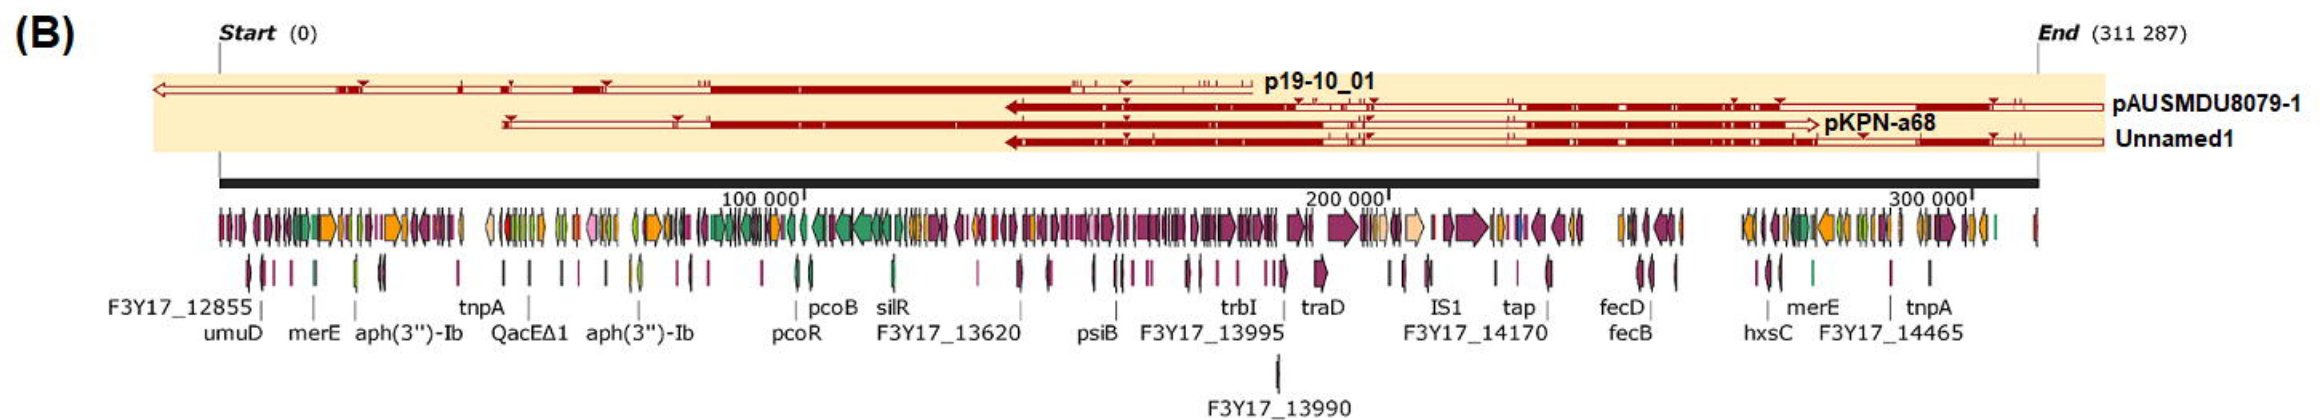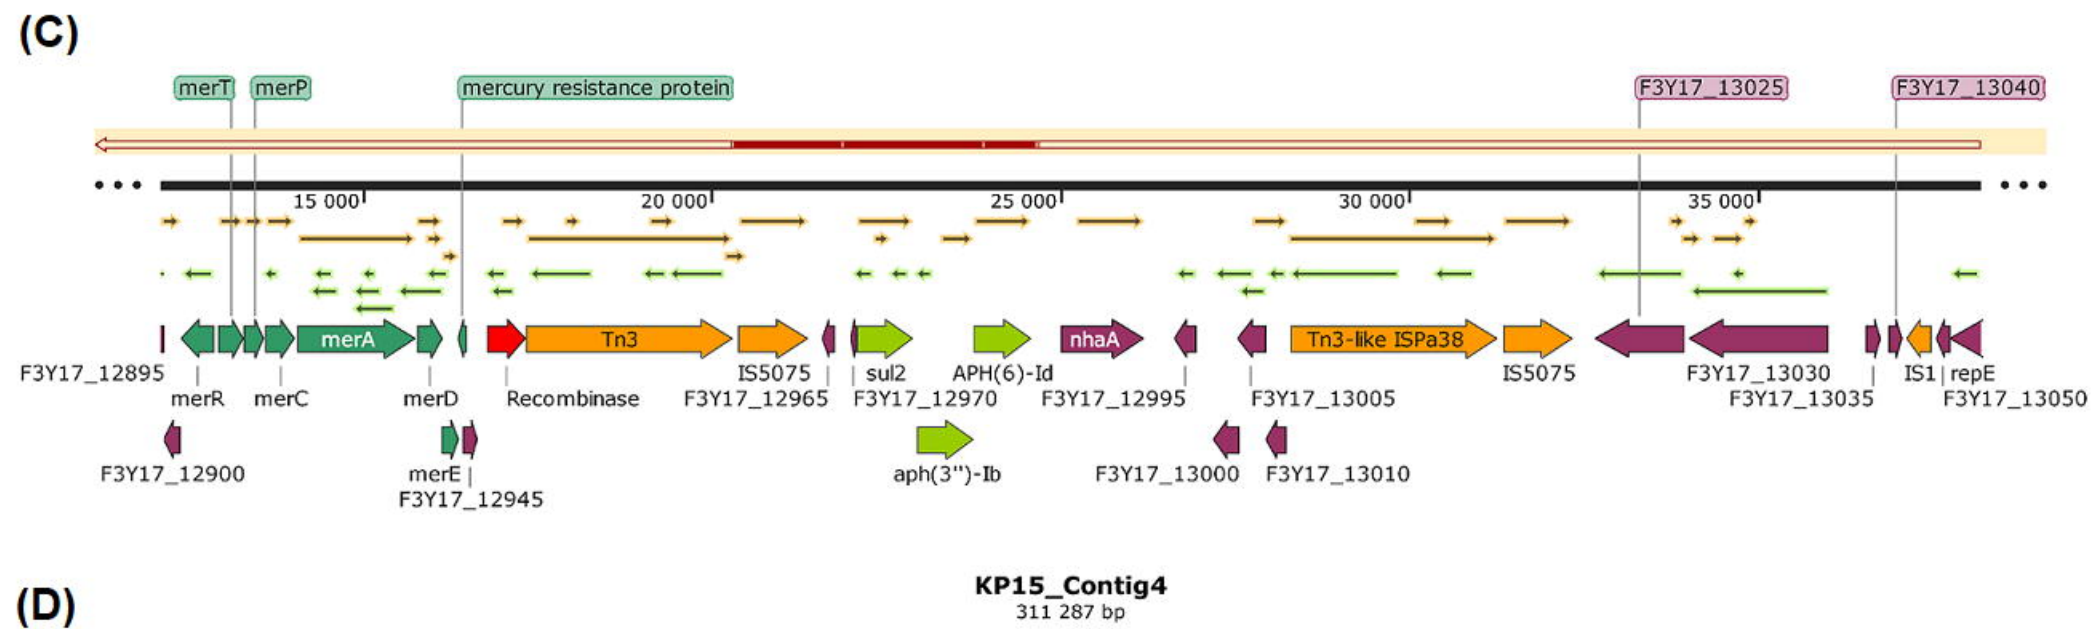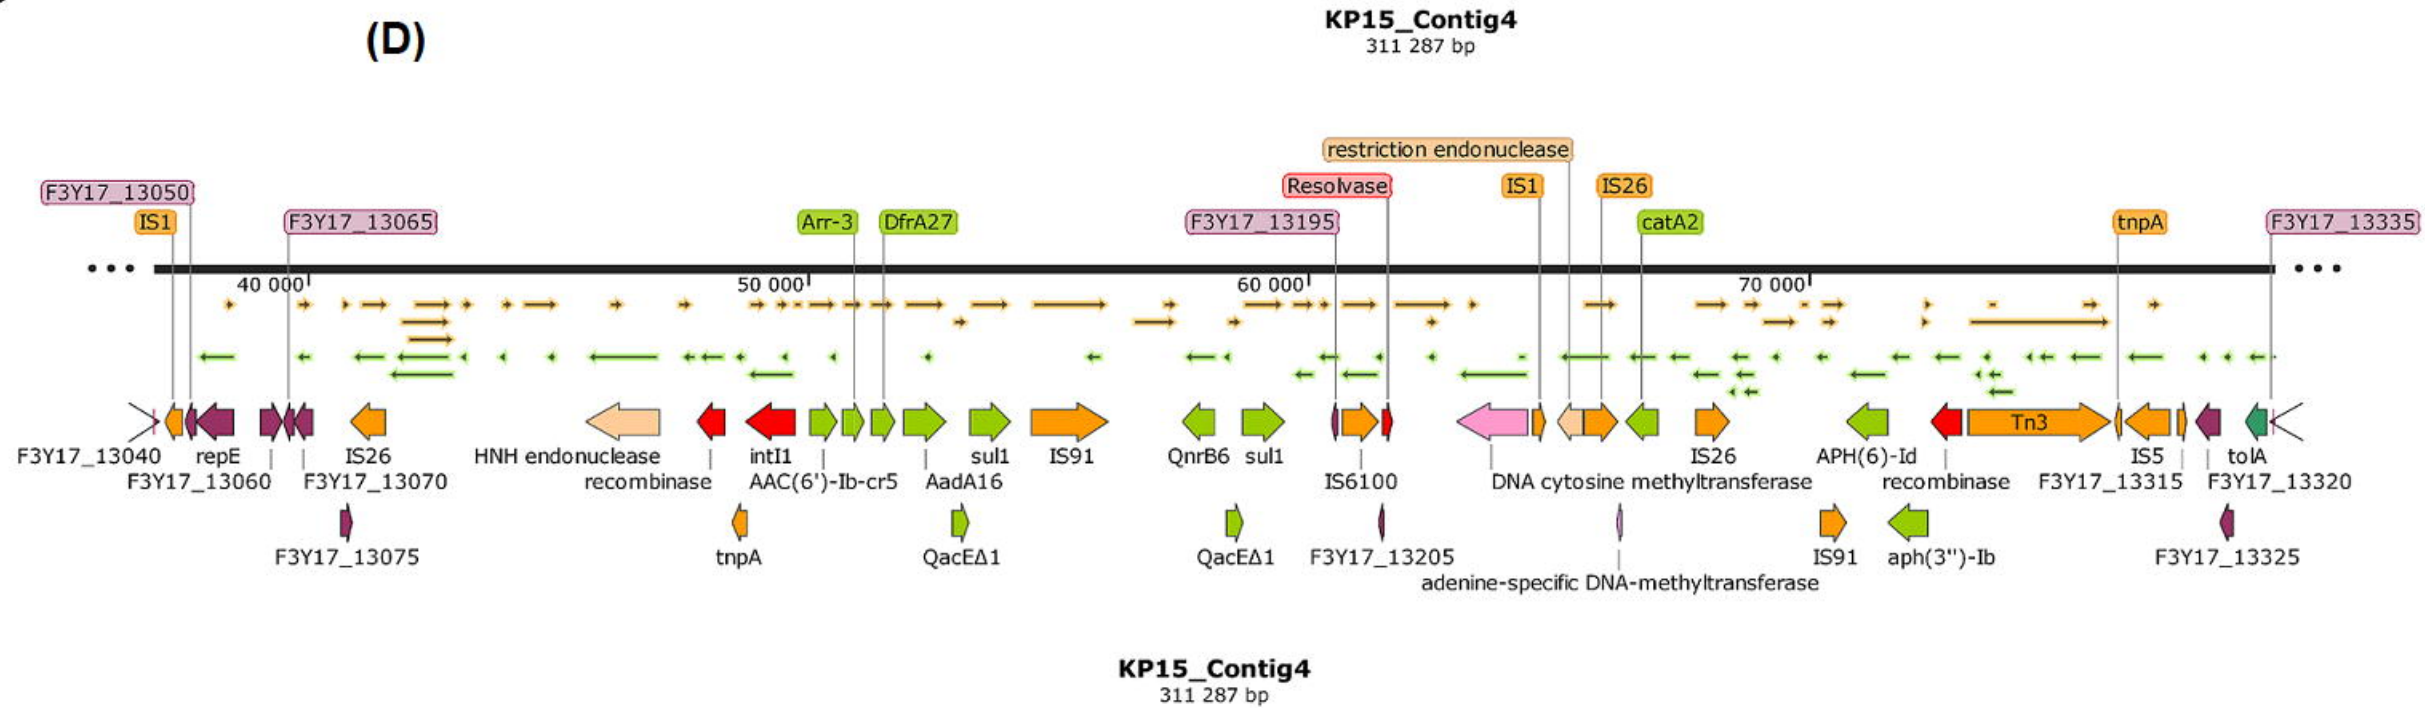

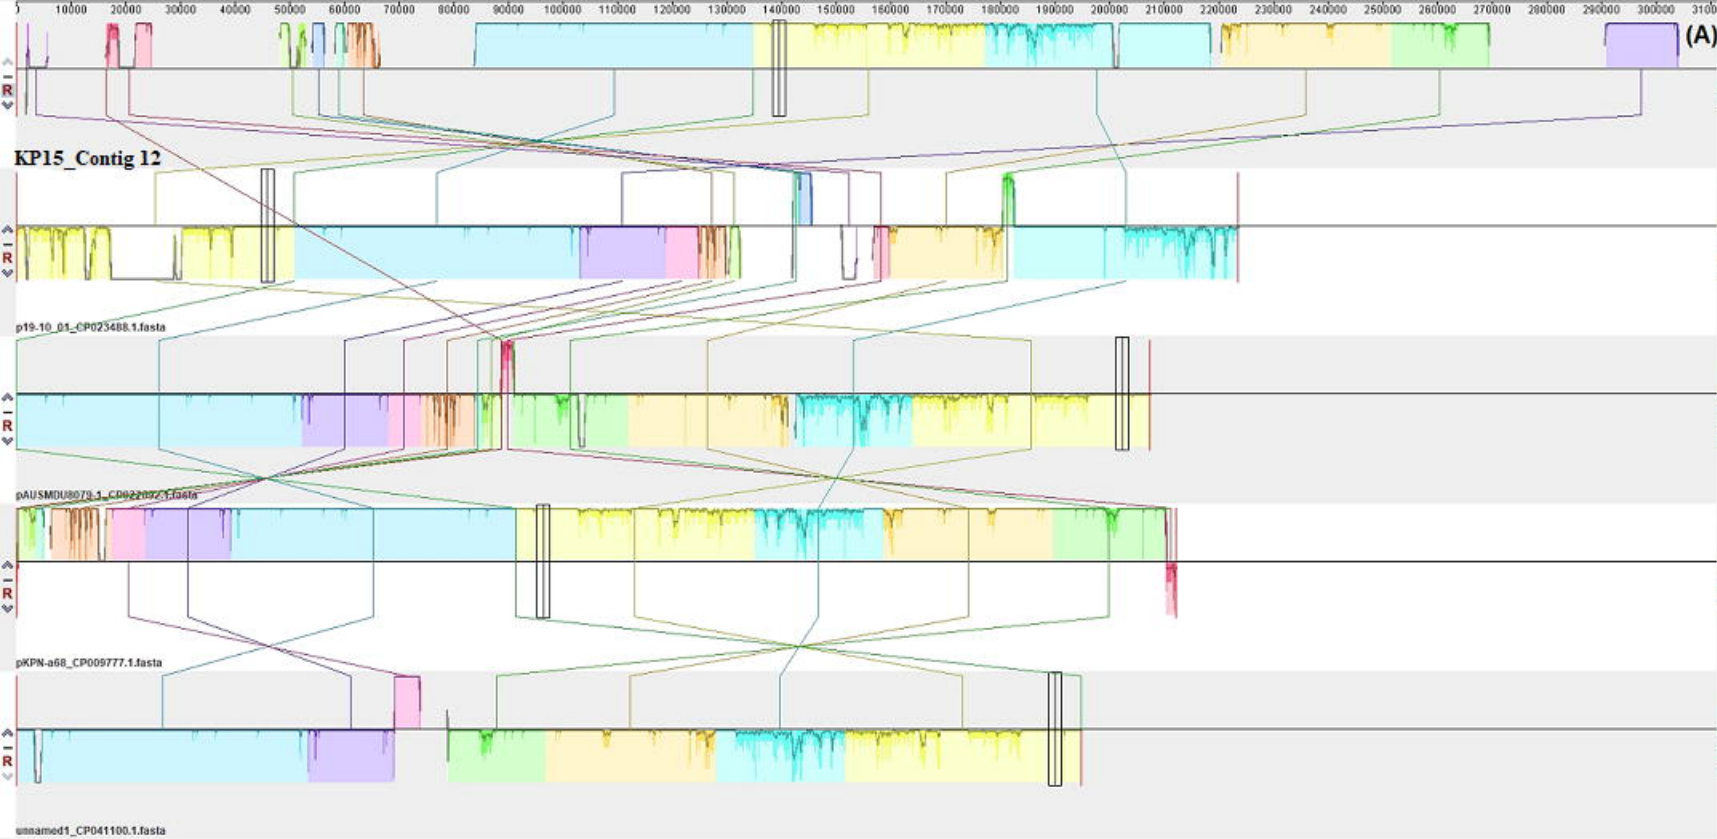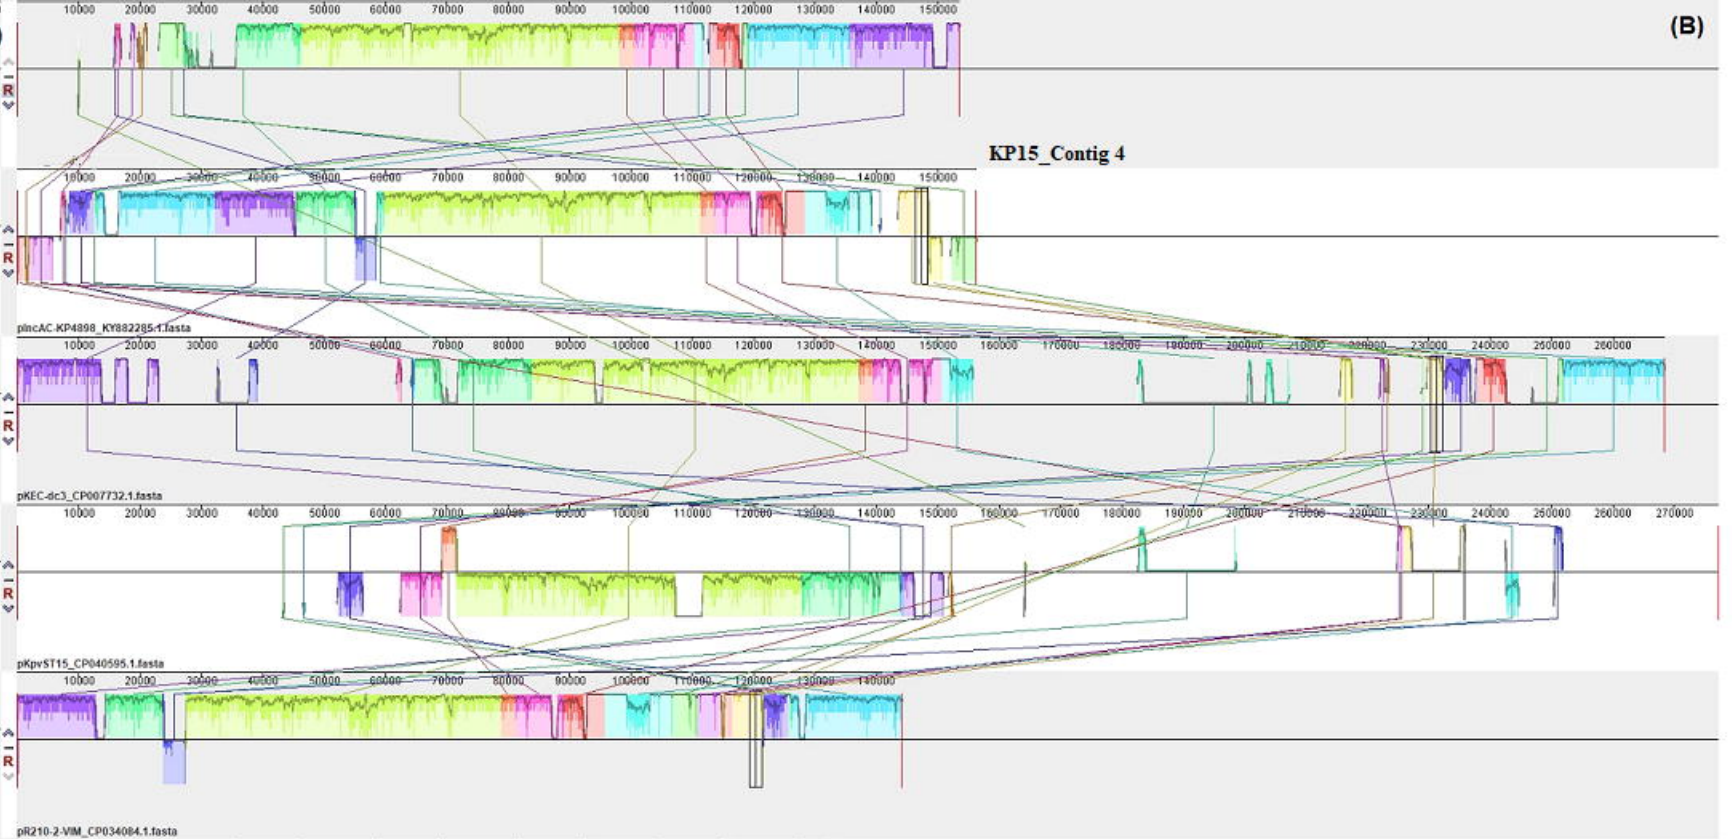

medRxiv preprint doi: <https://doi.org/10.1101/2020.06.20.201035632>; this version posted June 23, 2020. The copyright holder for this preprint (which was not certified by peer review) is the author/funder, who has granted medRxiv a license to display the preprint in perpetuity. It is made available under a [CC-BY-NC-ND 4.0 International license](#).

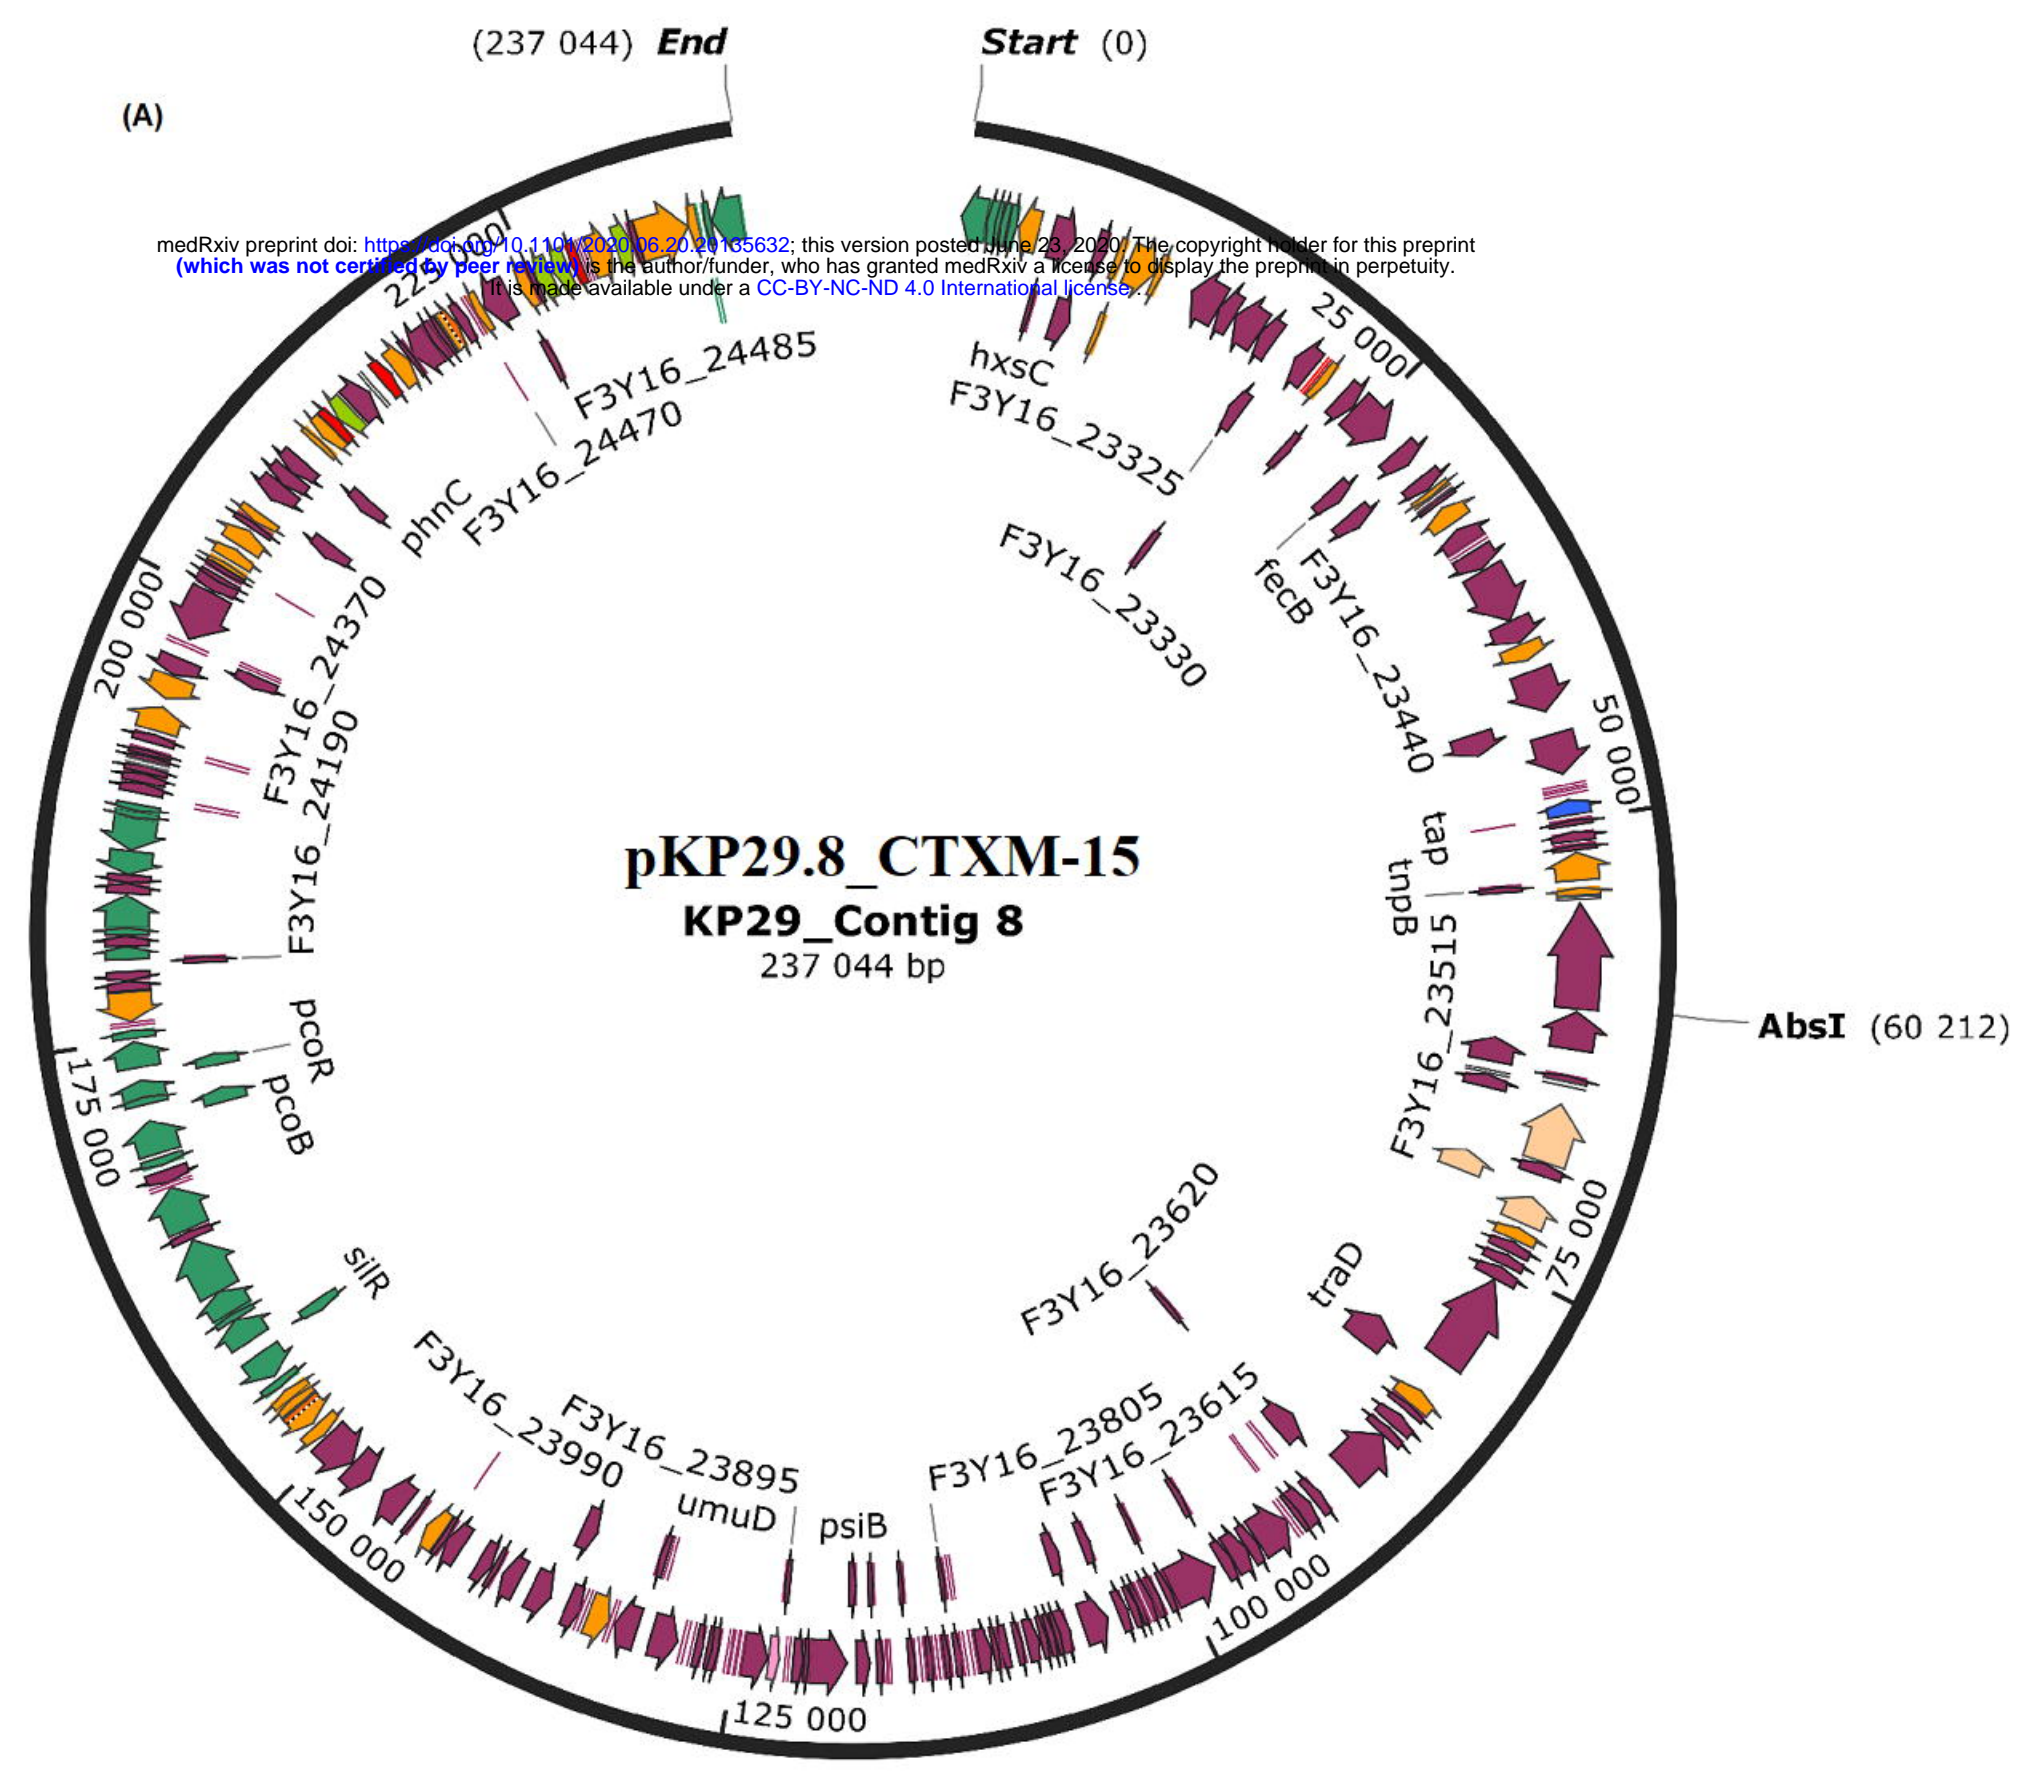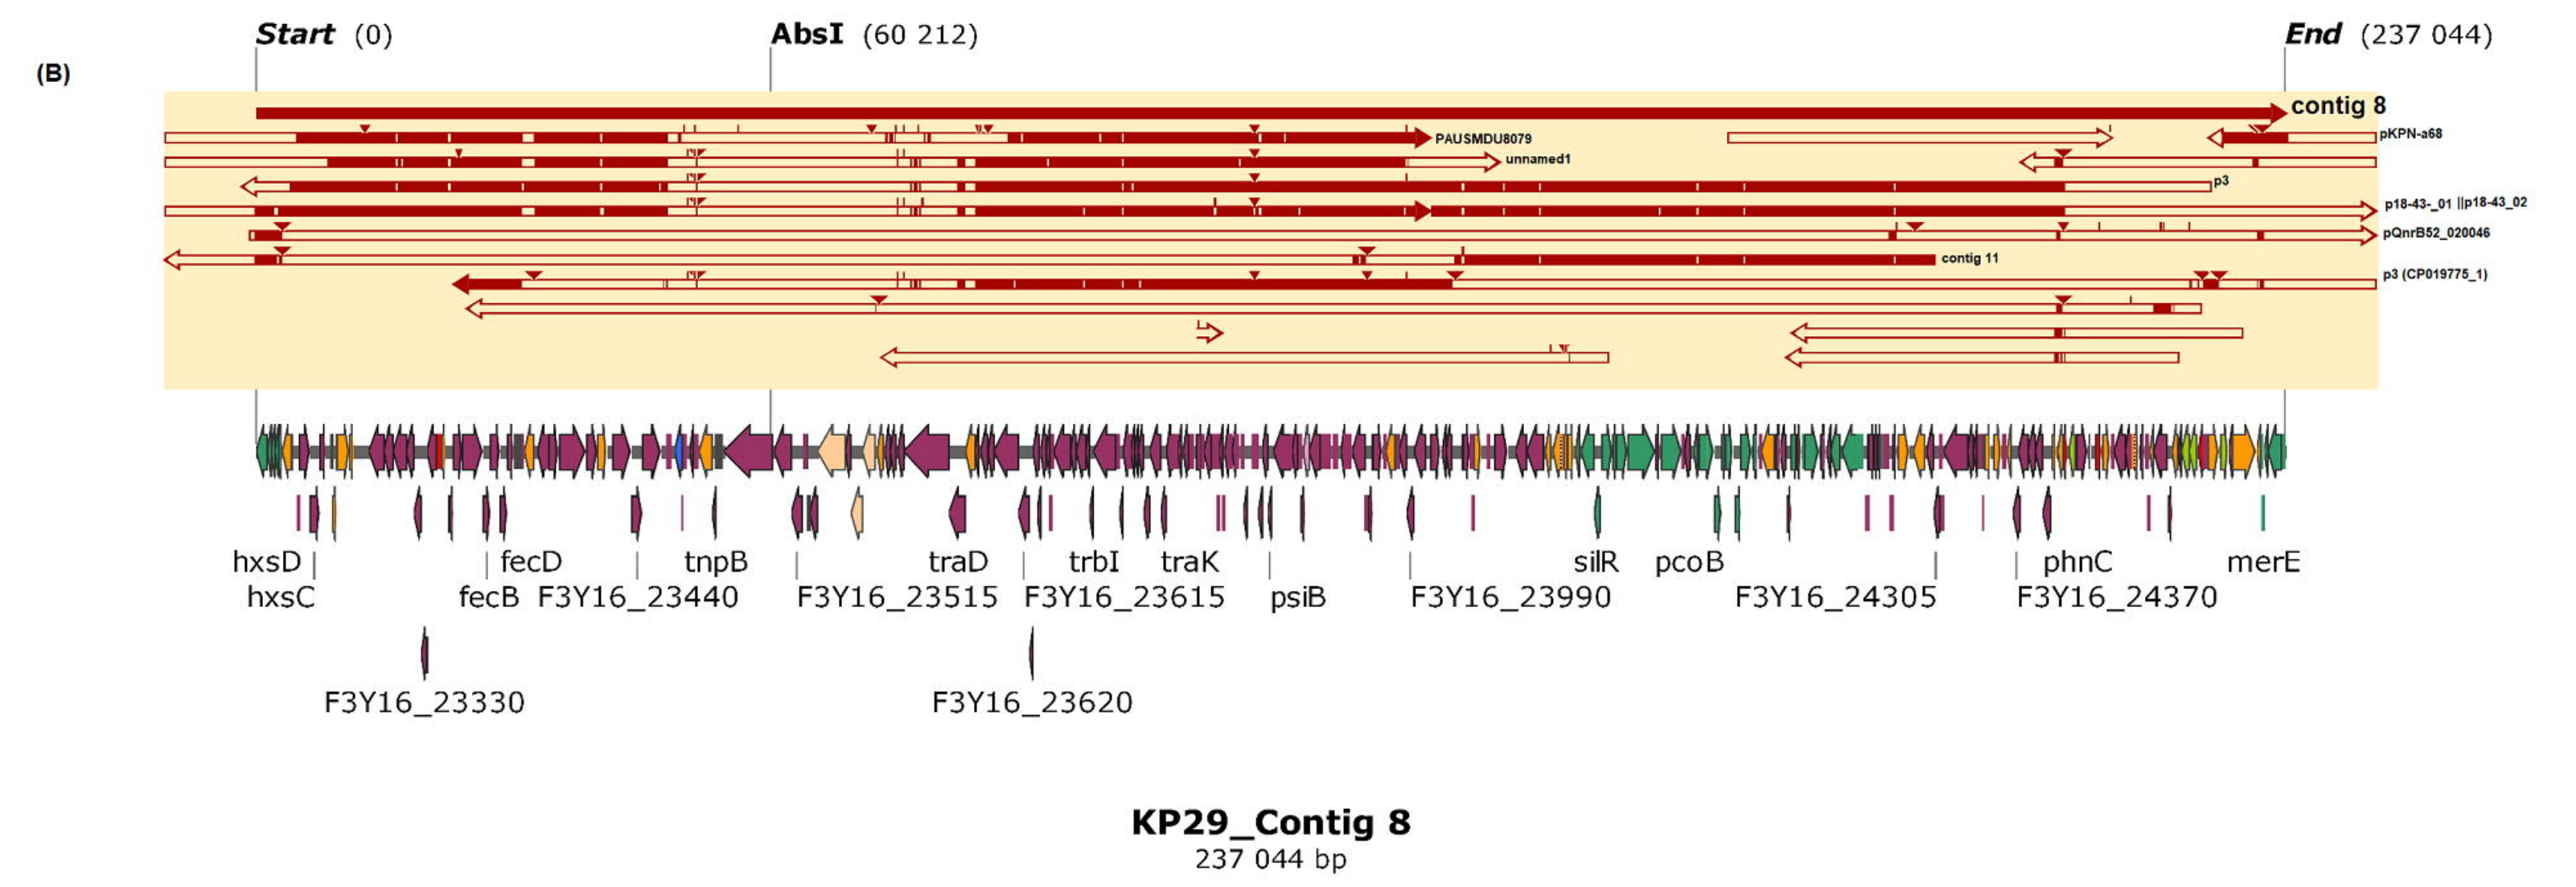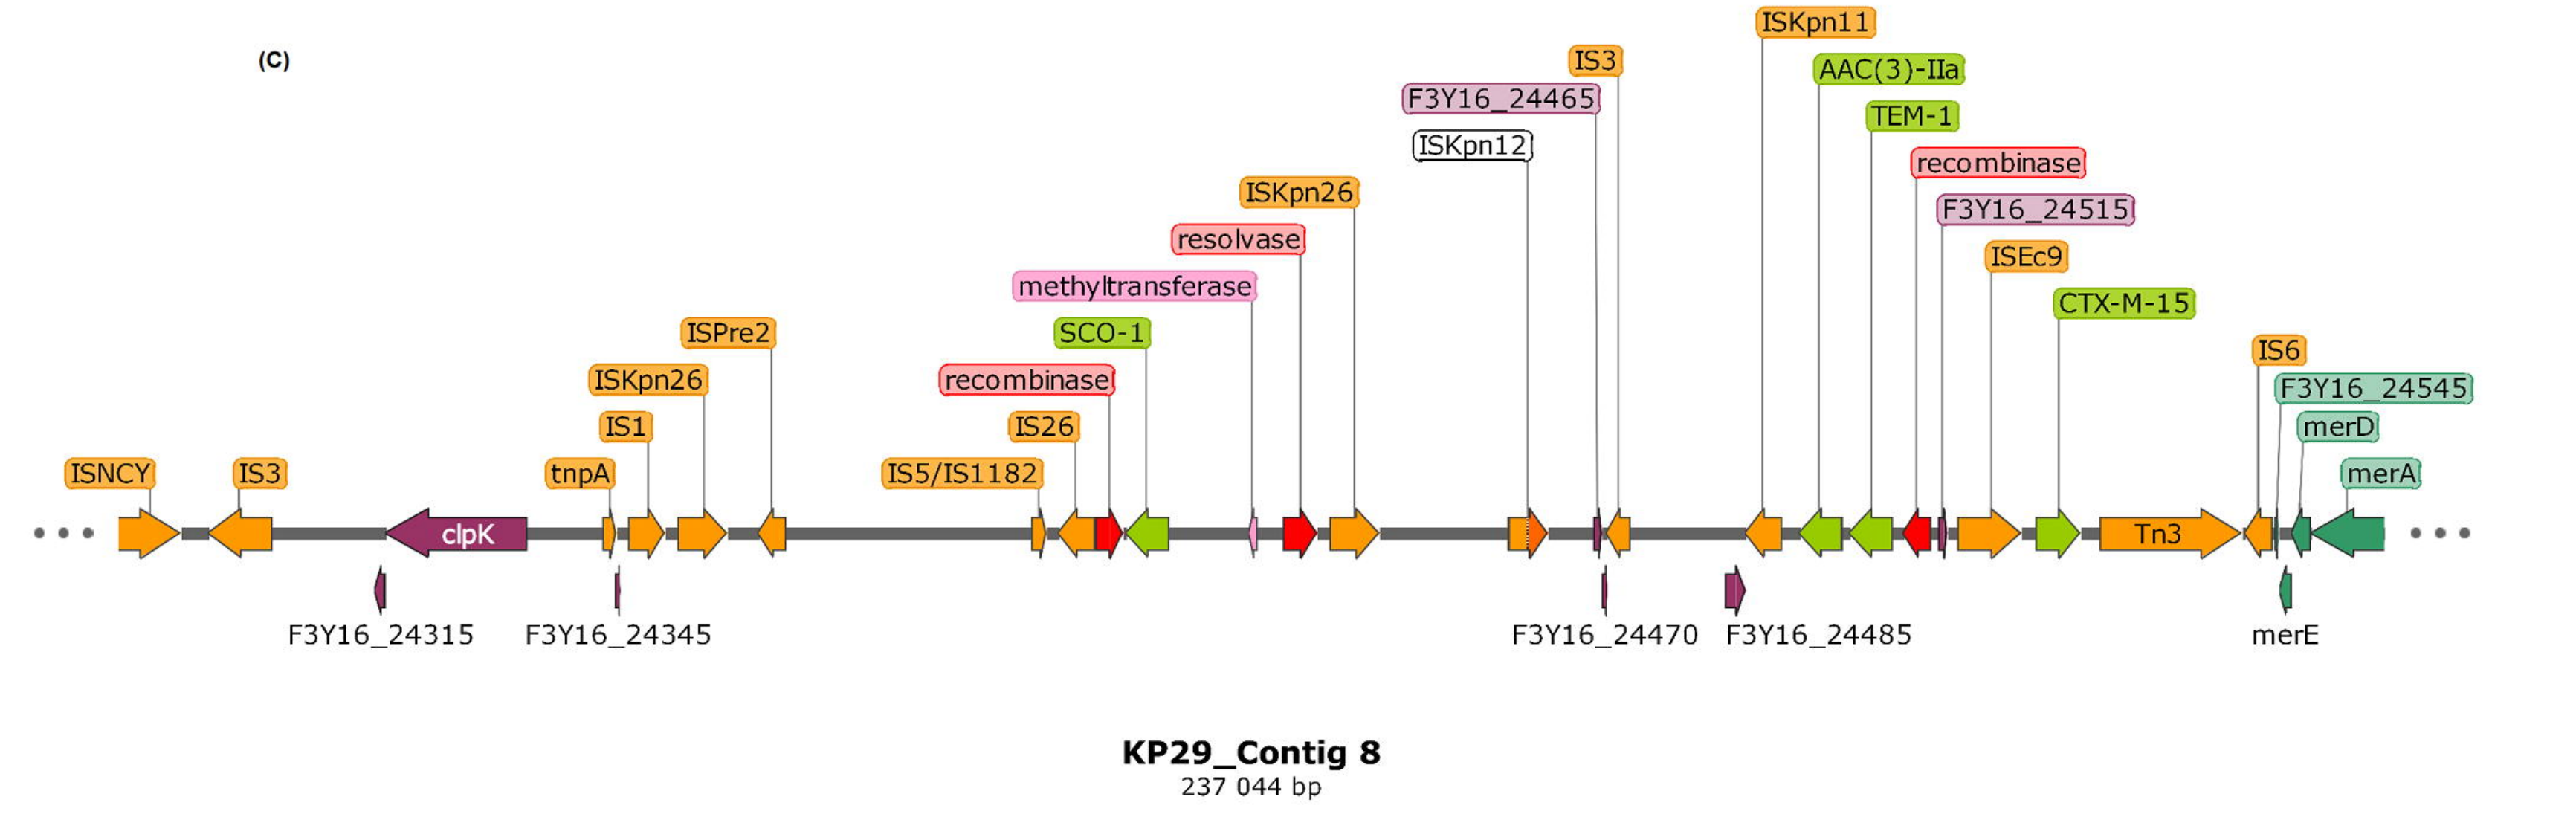



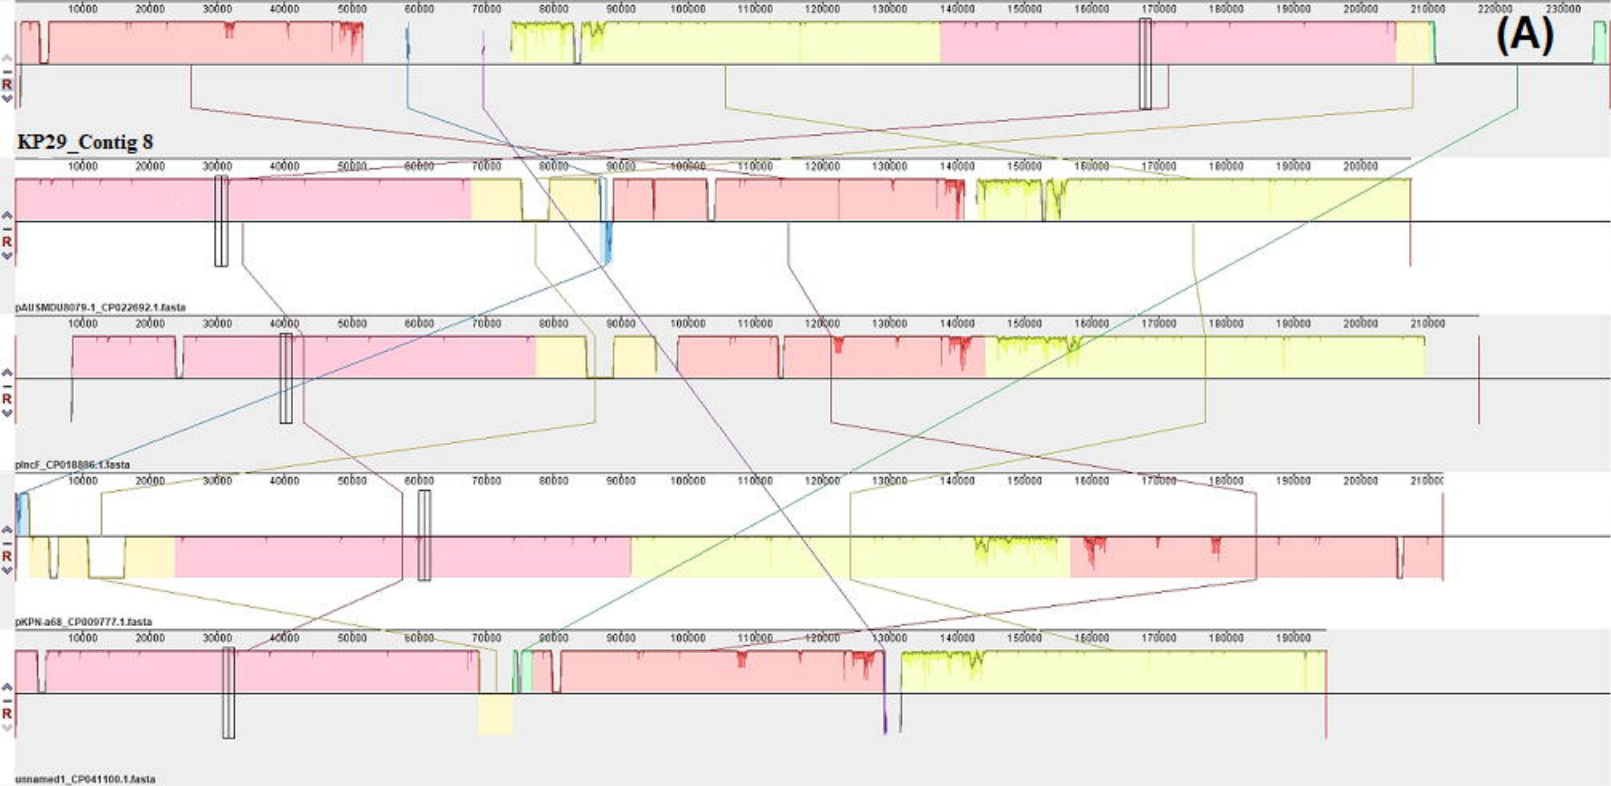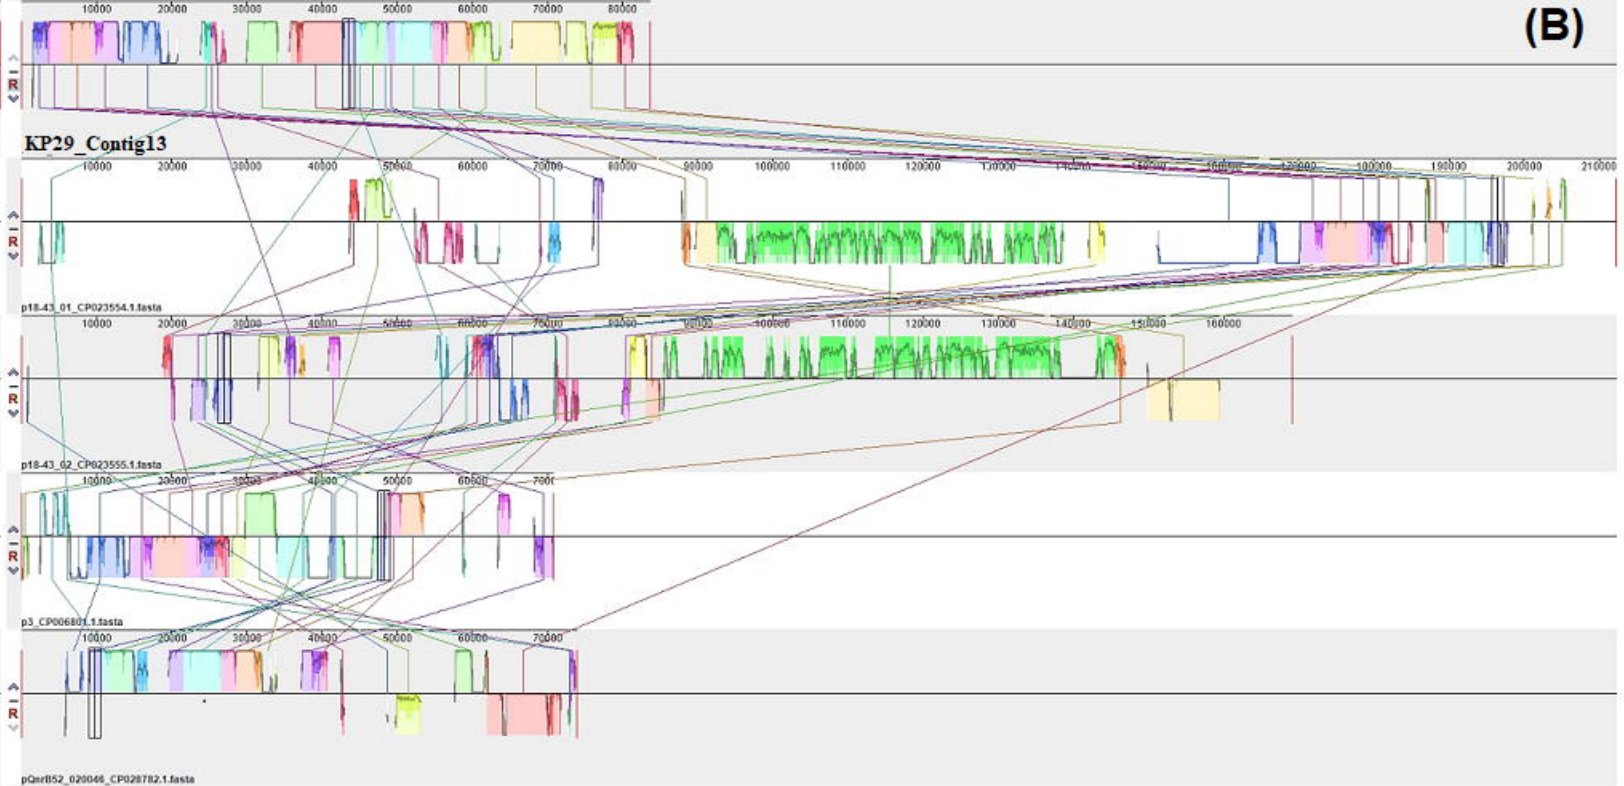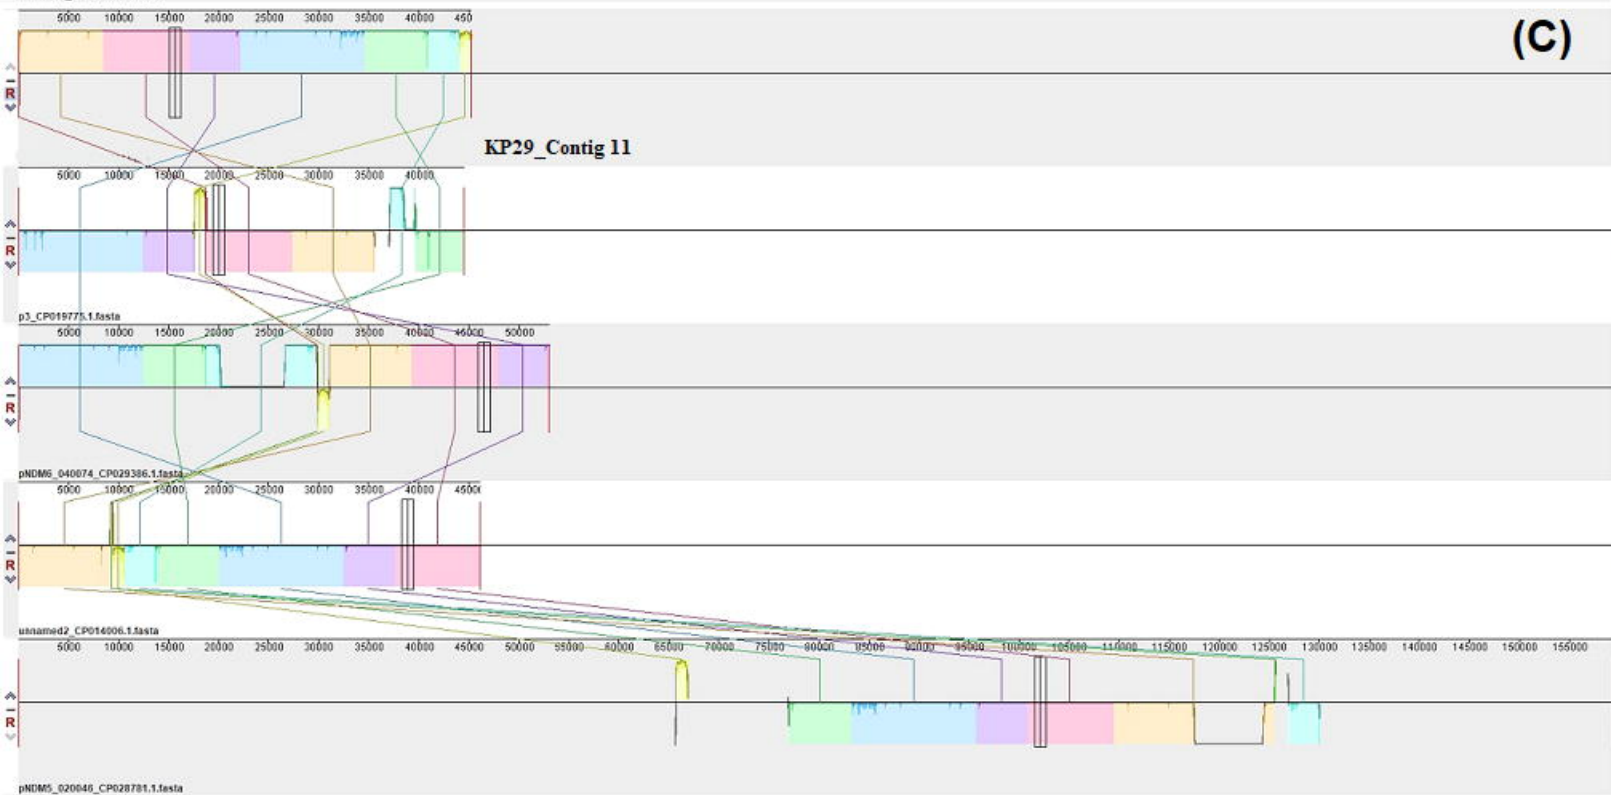

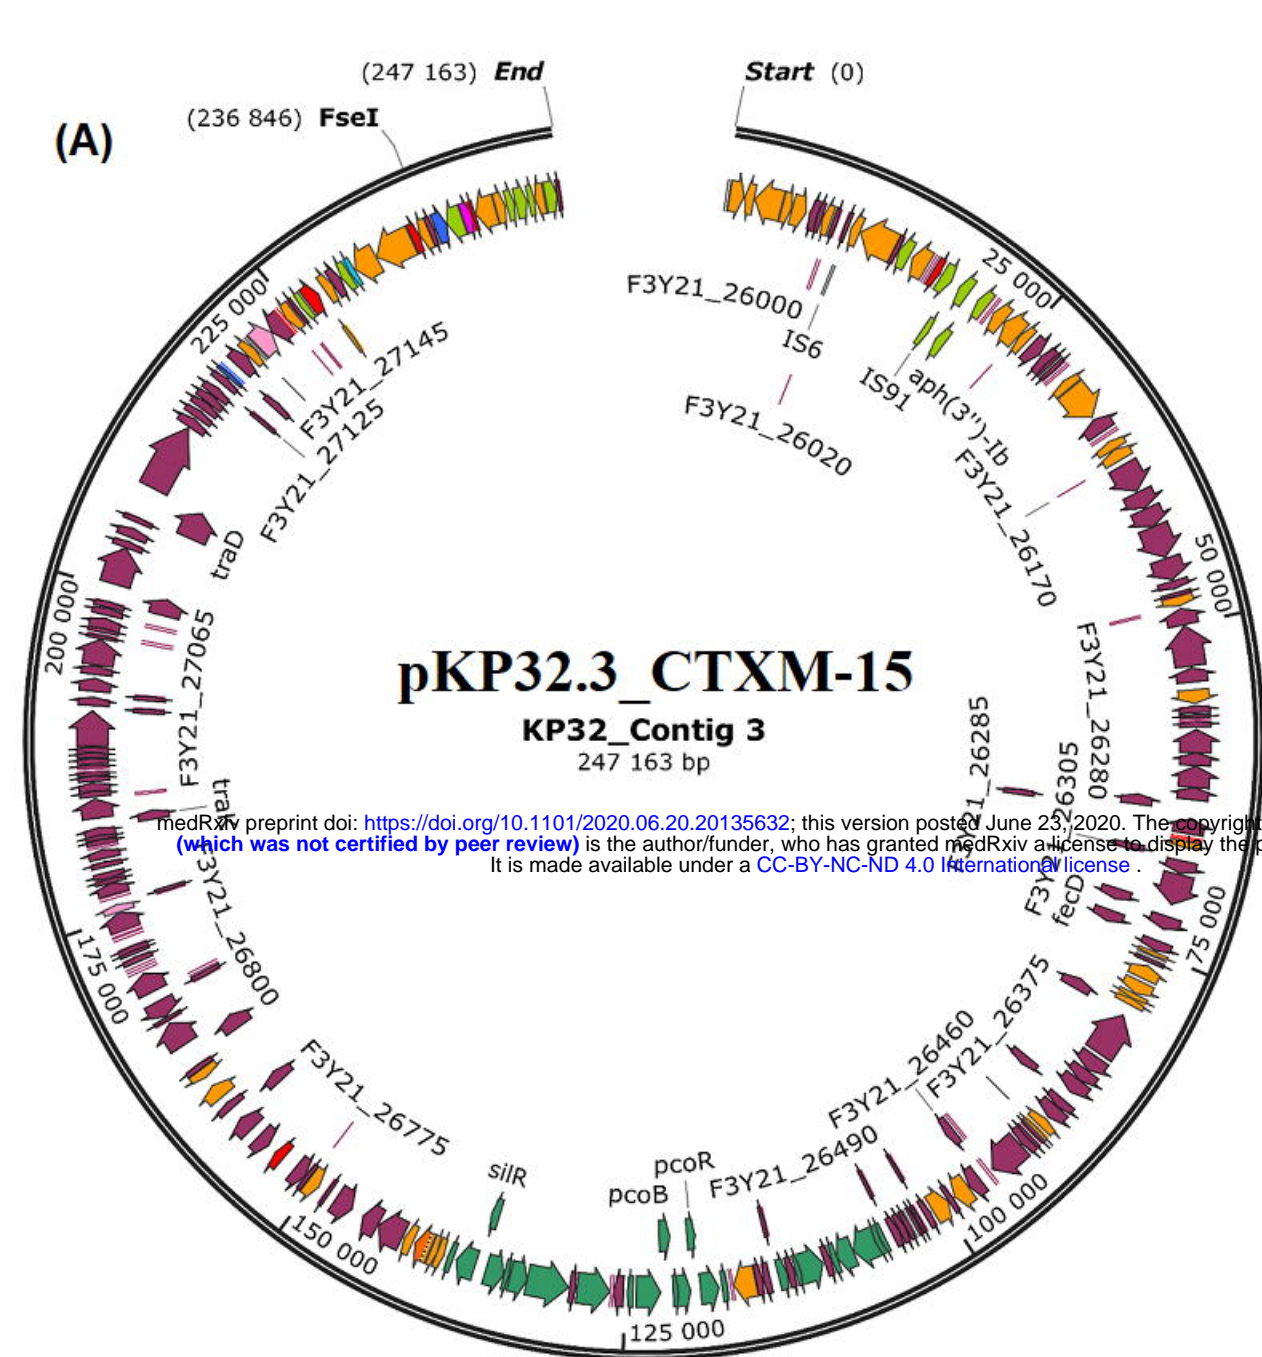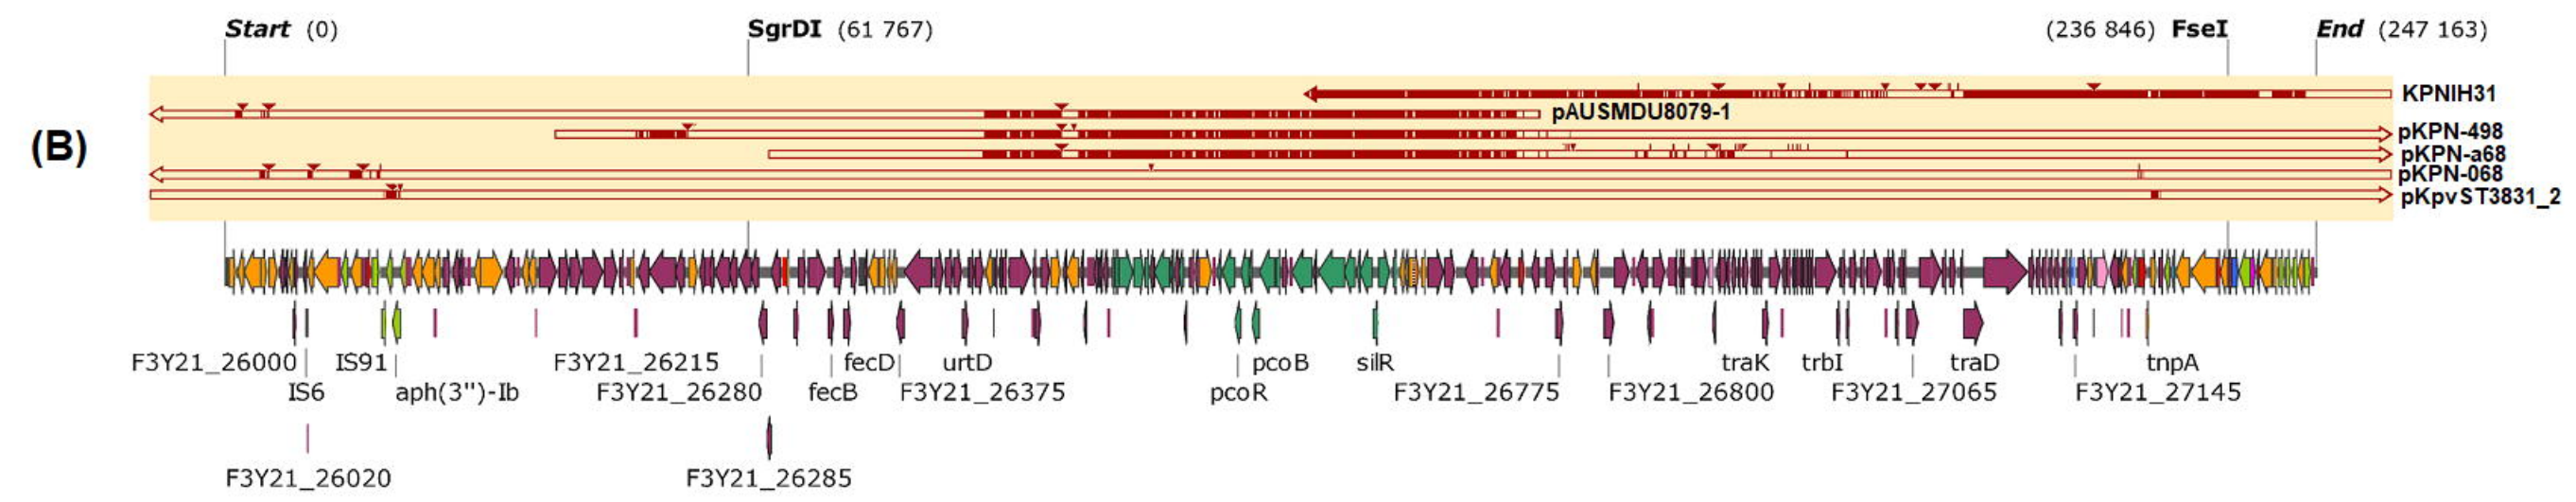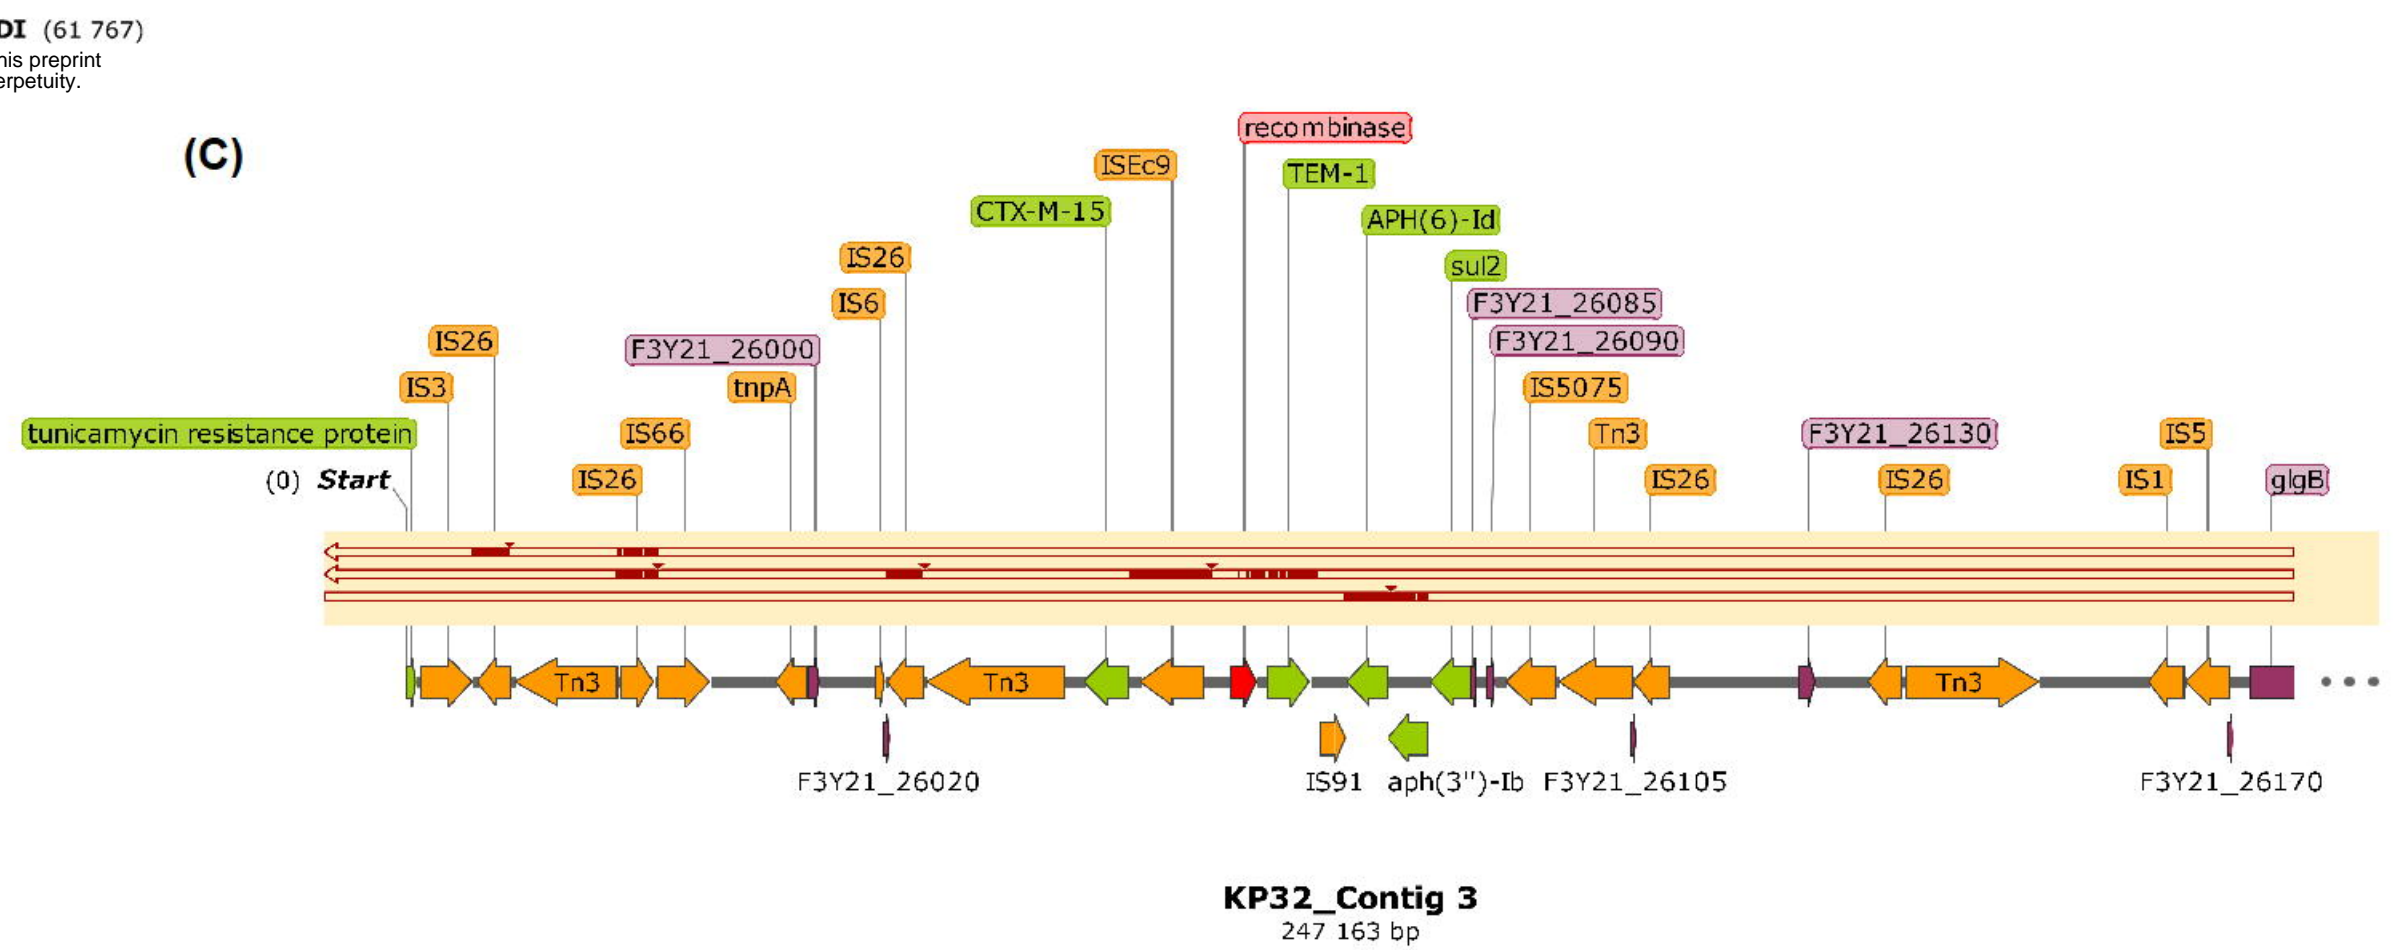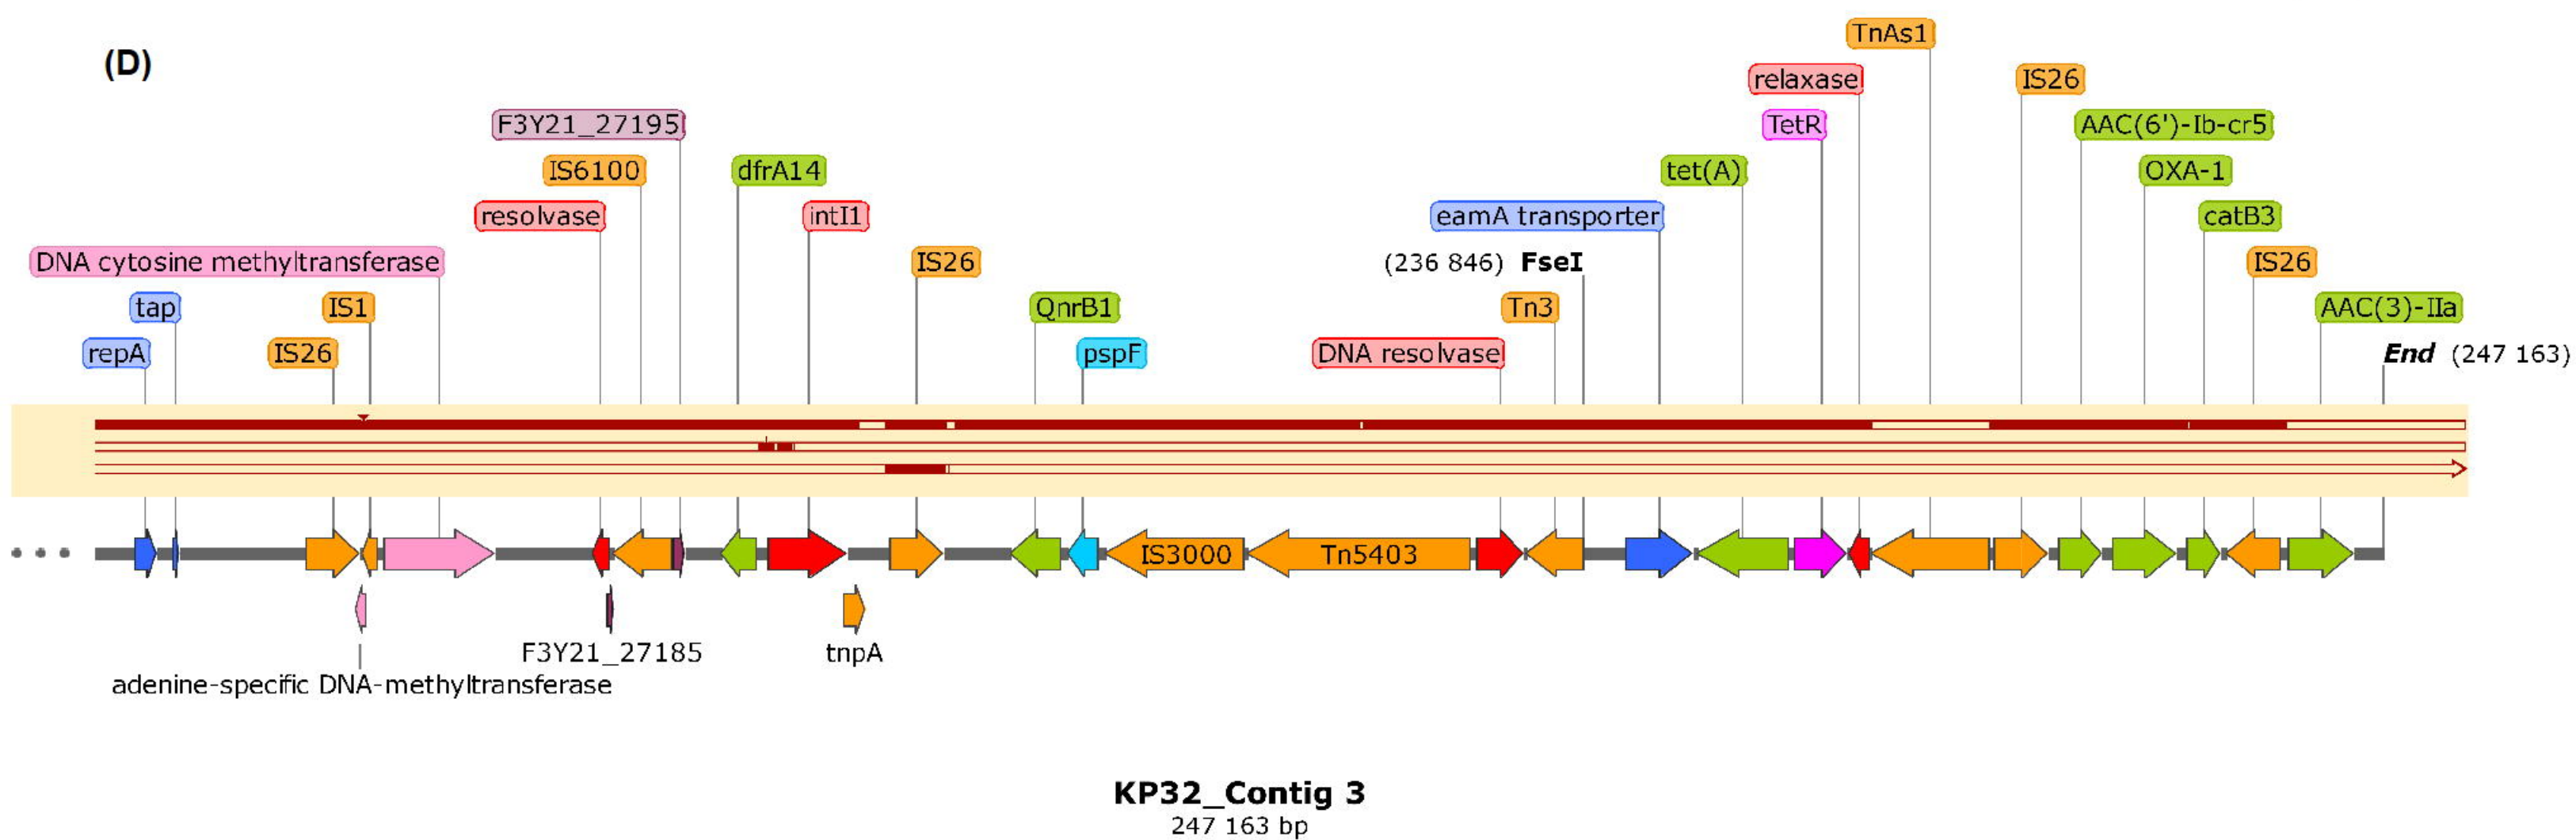



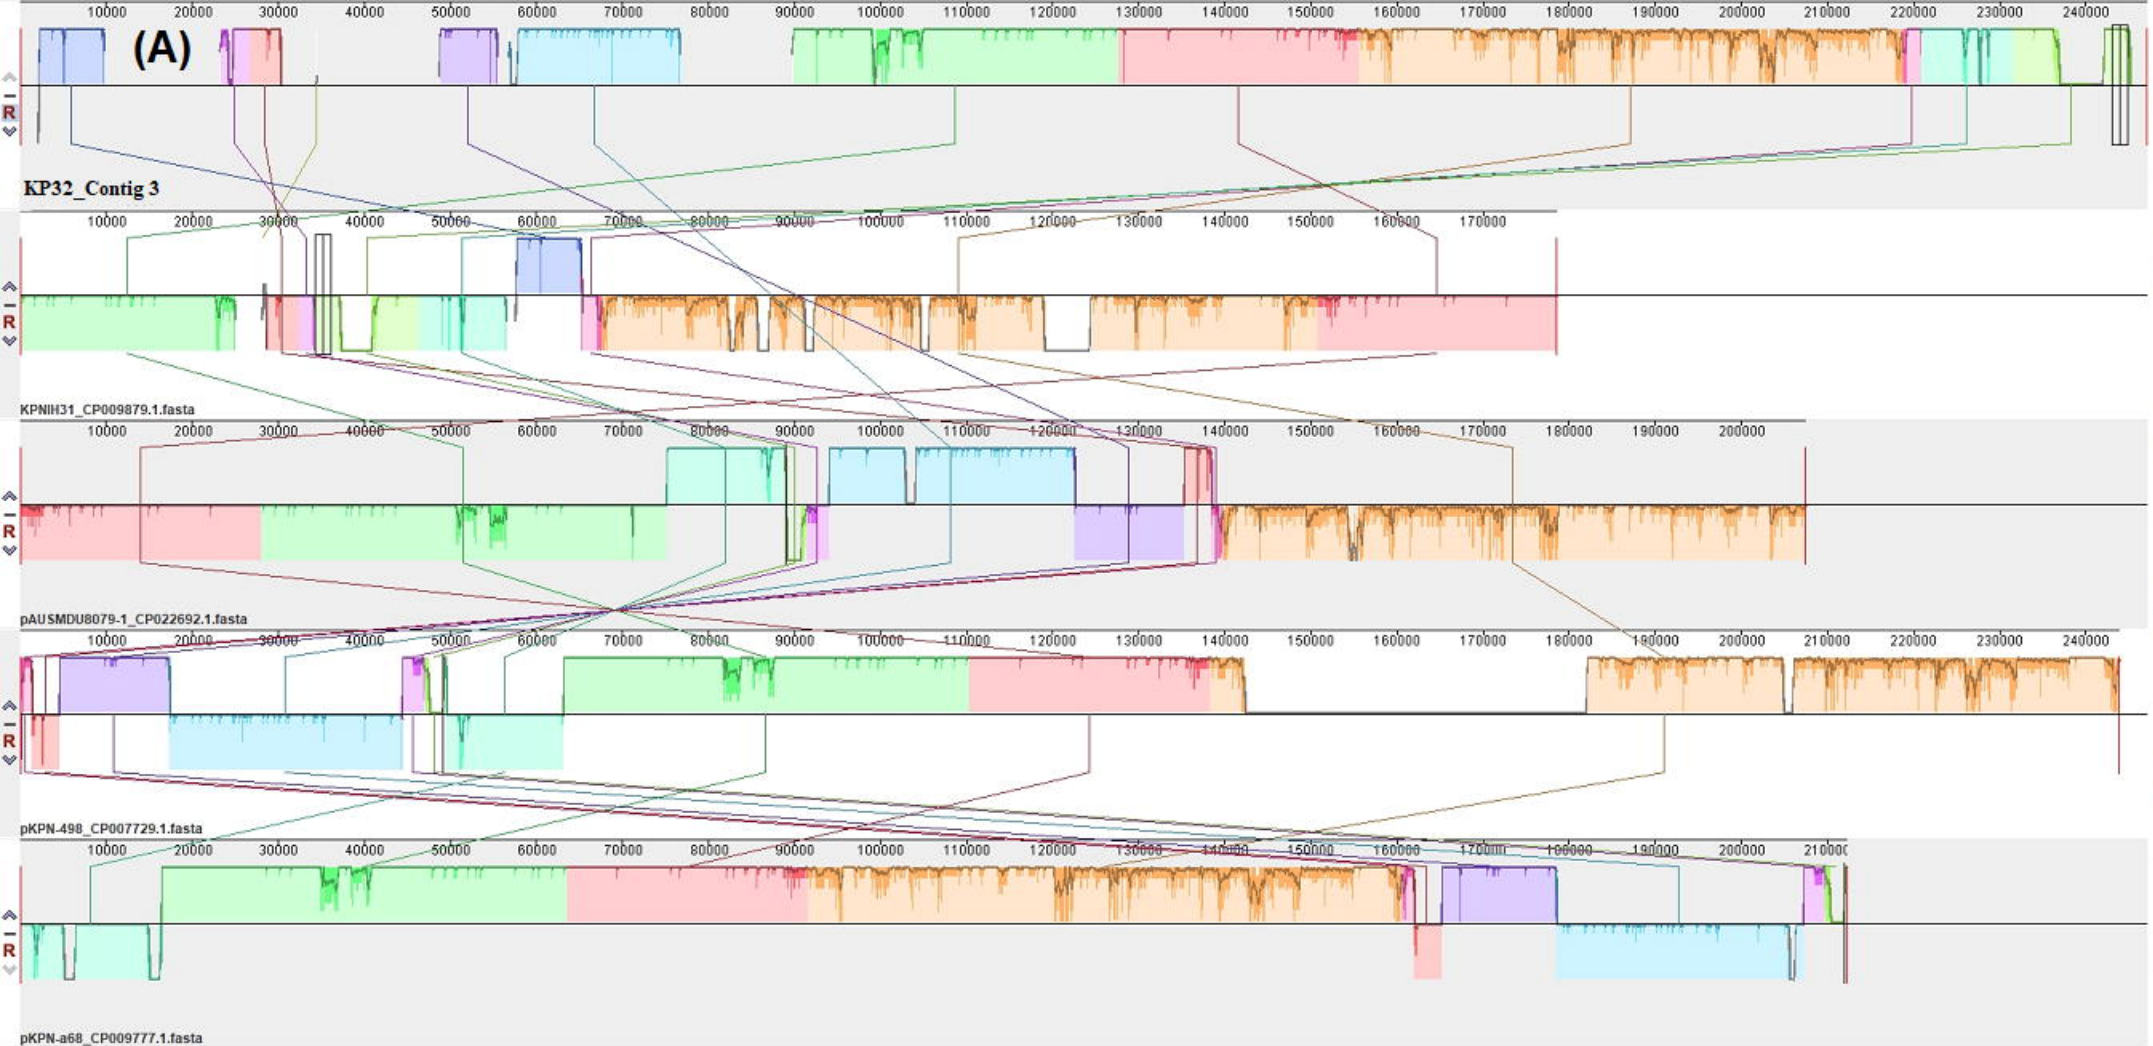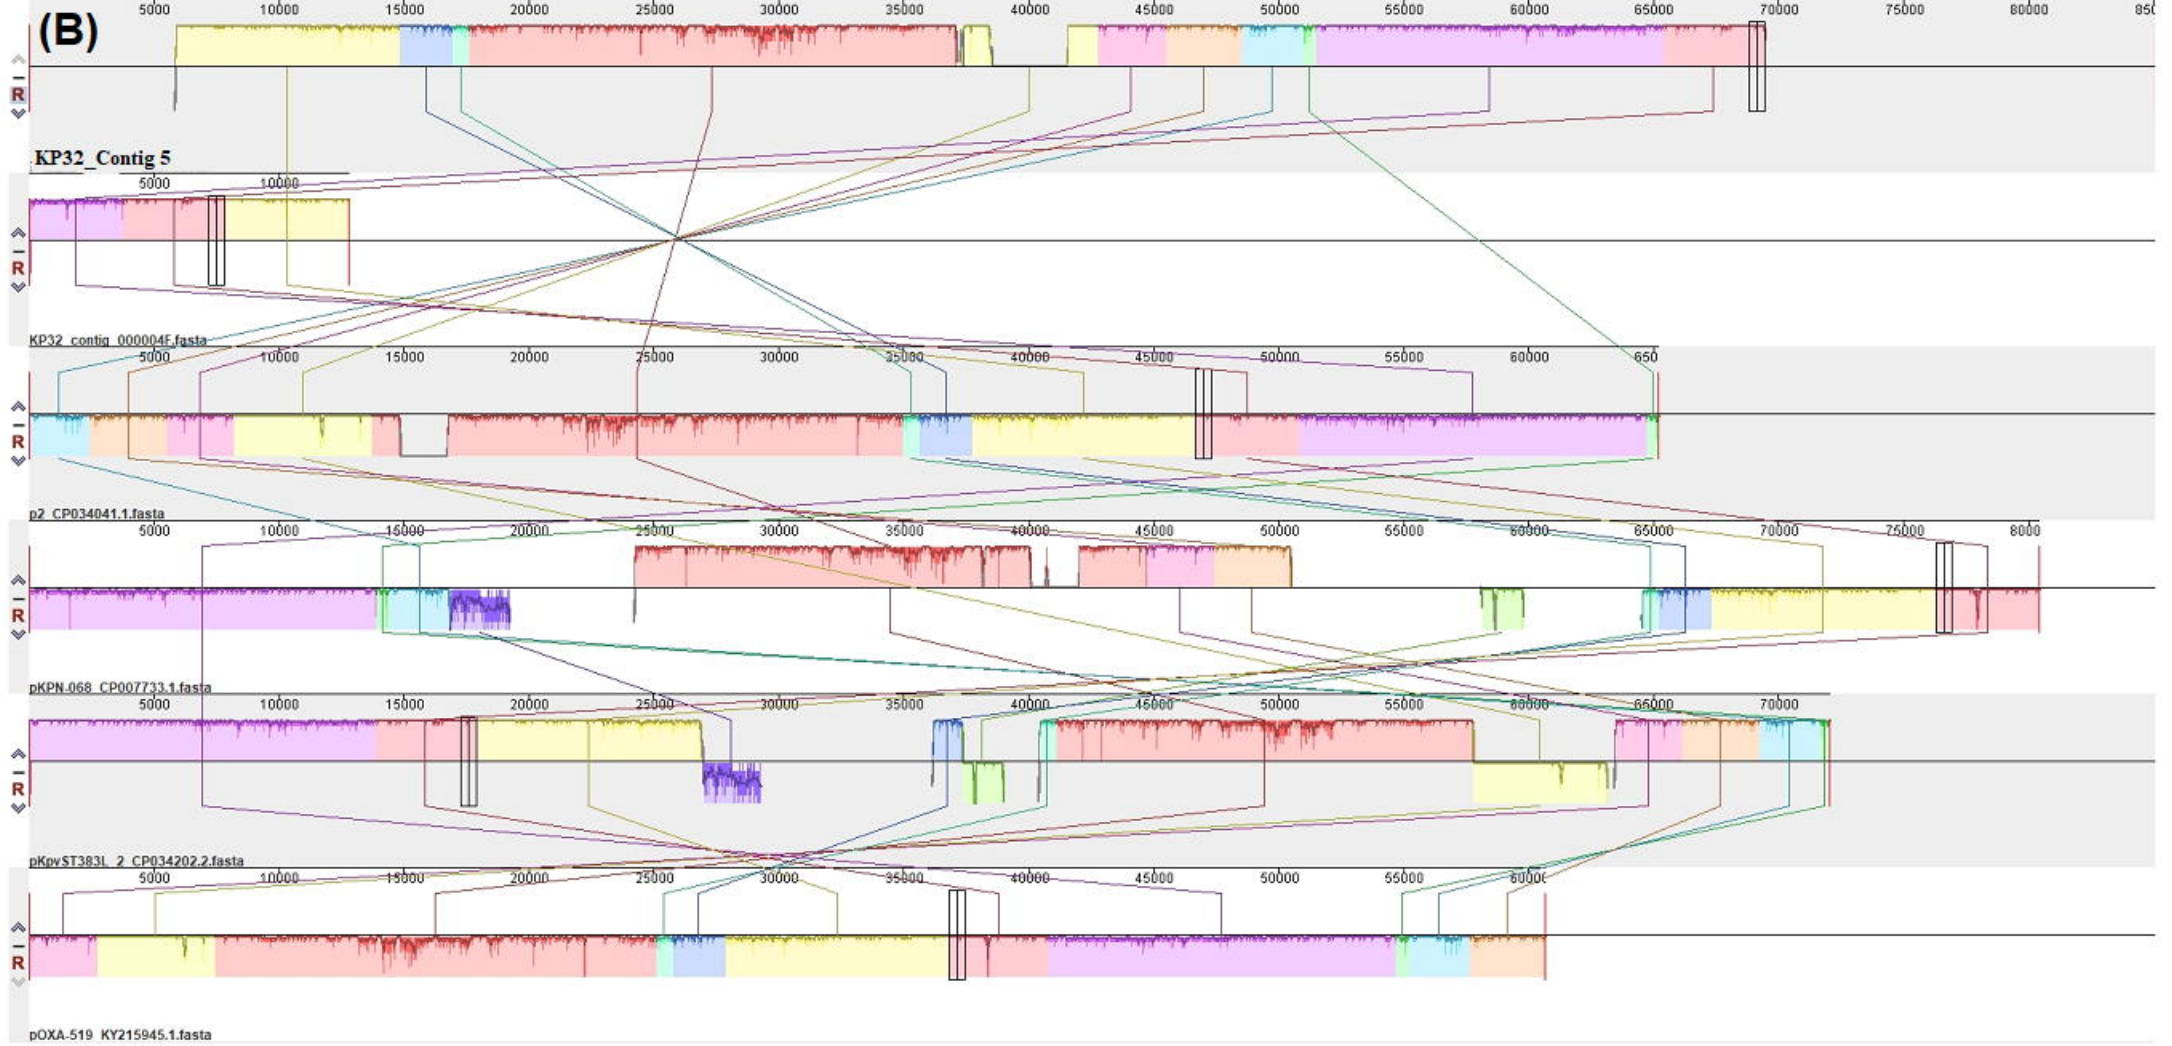

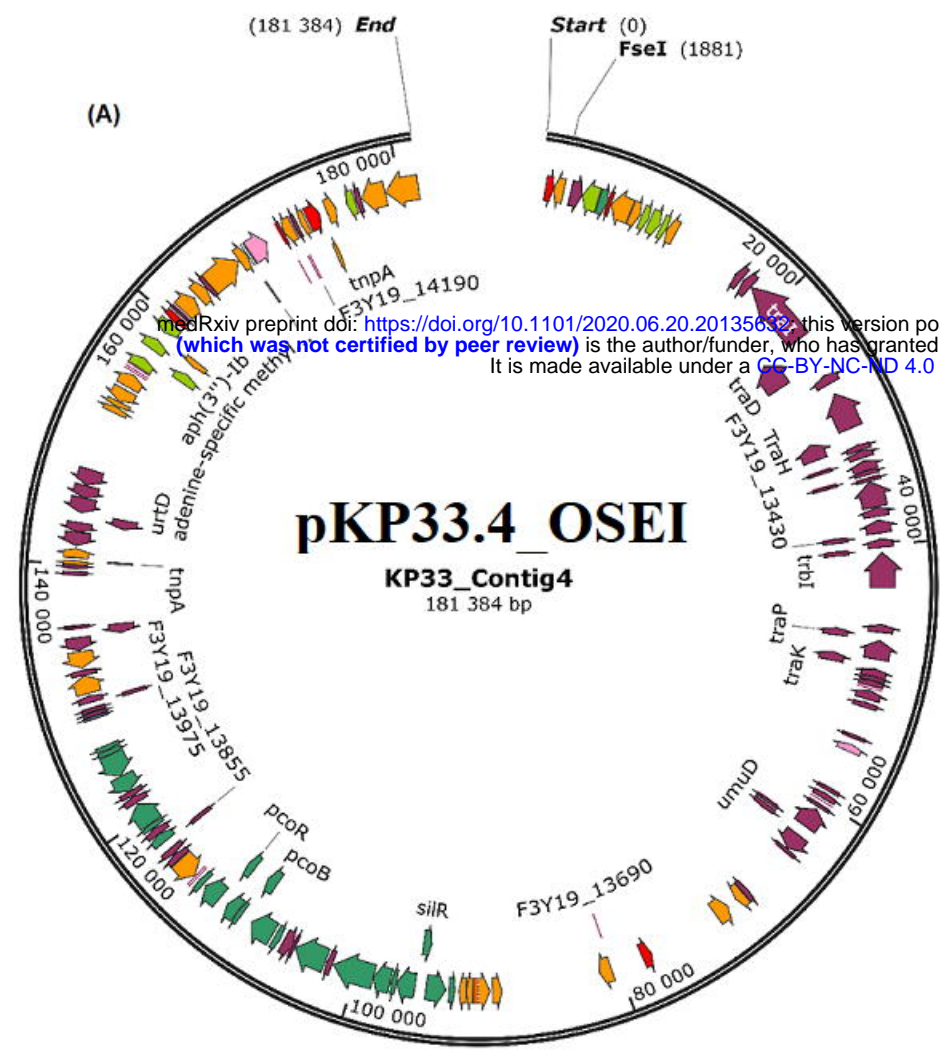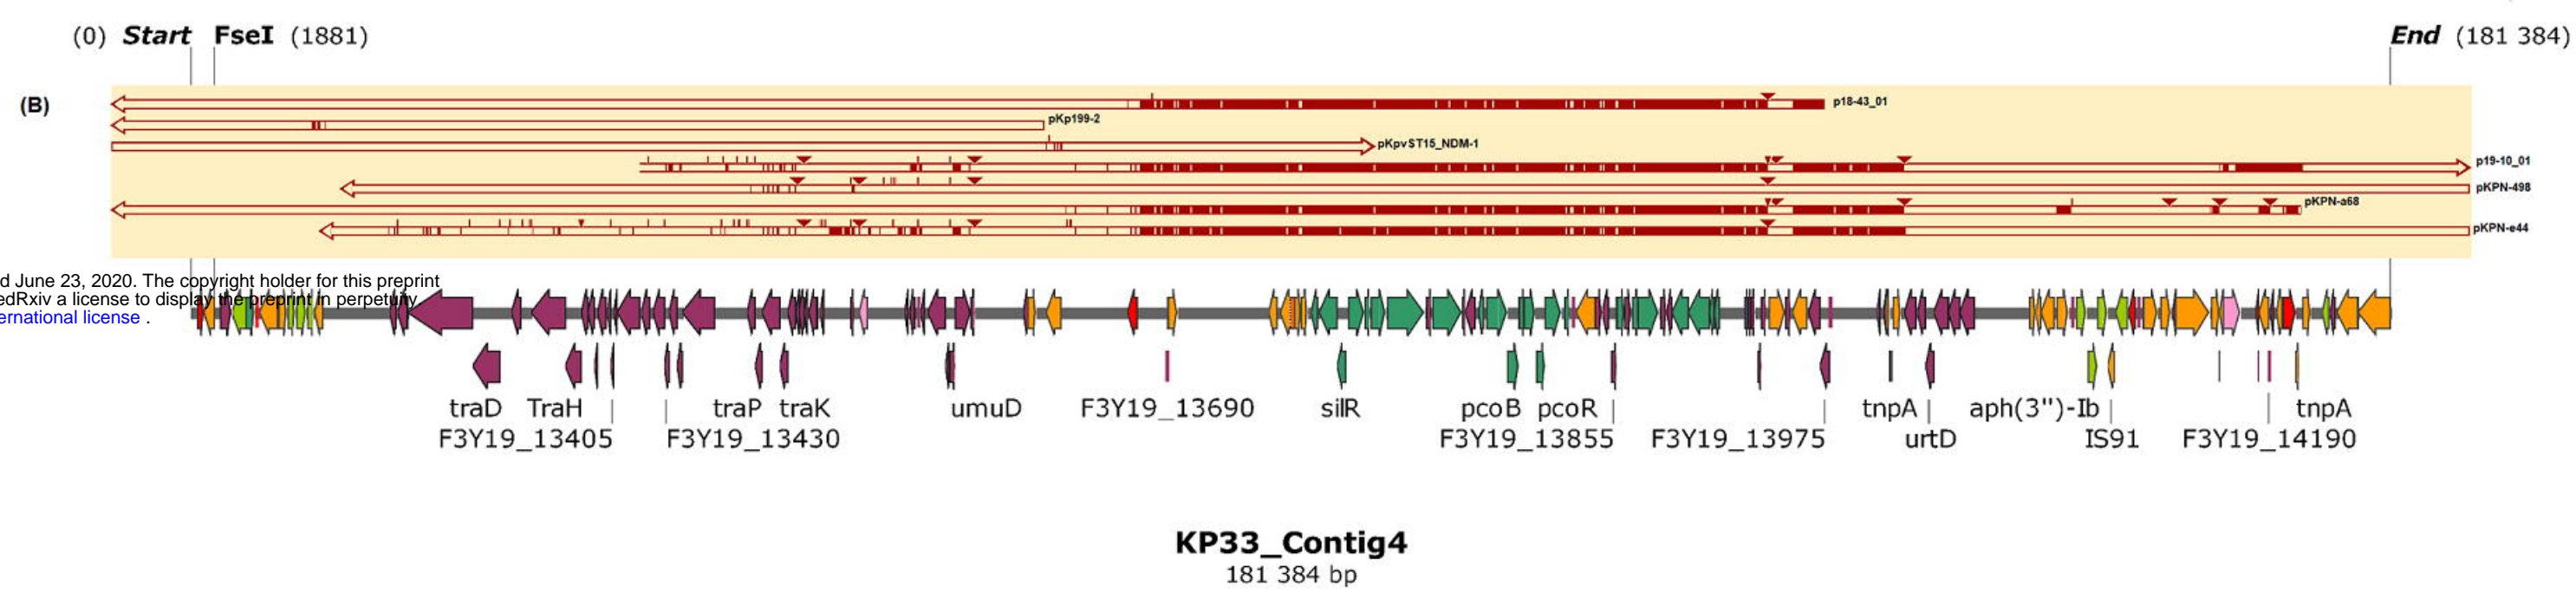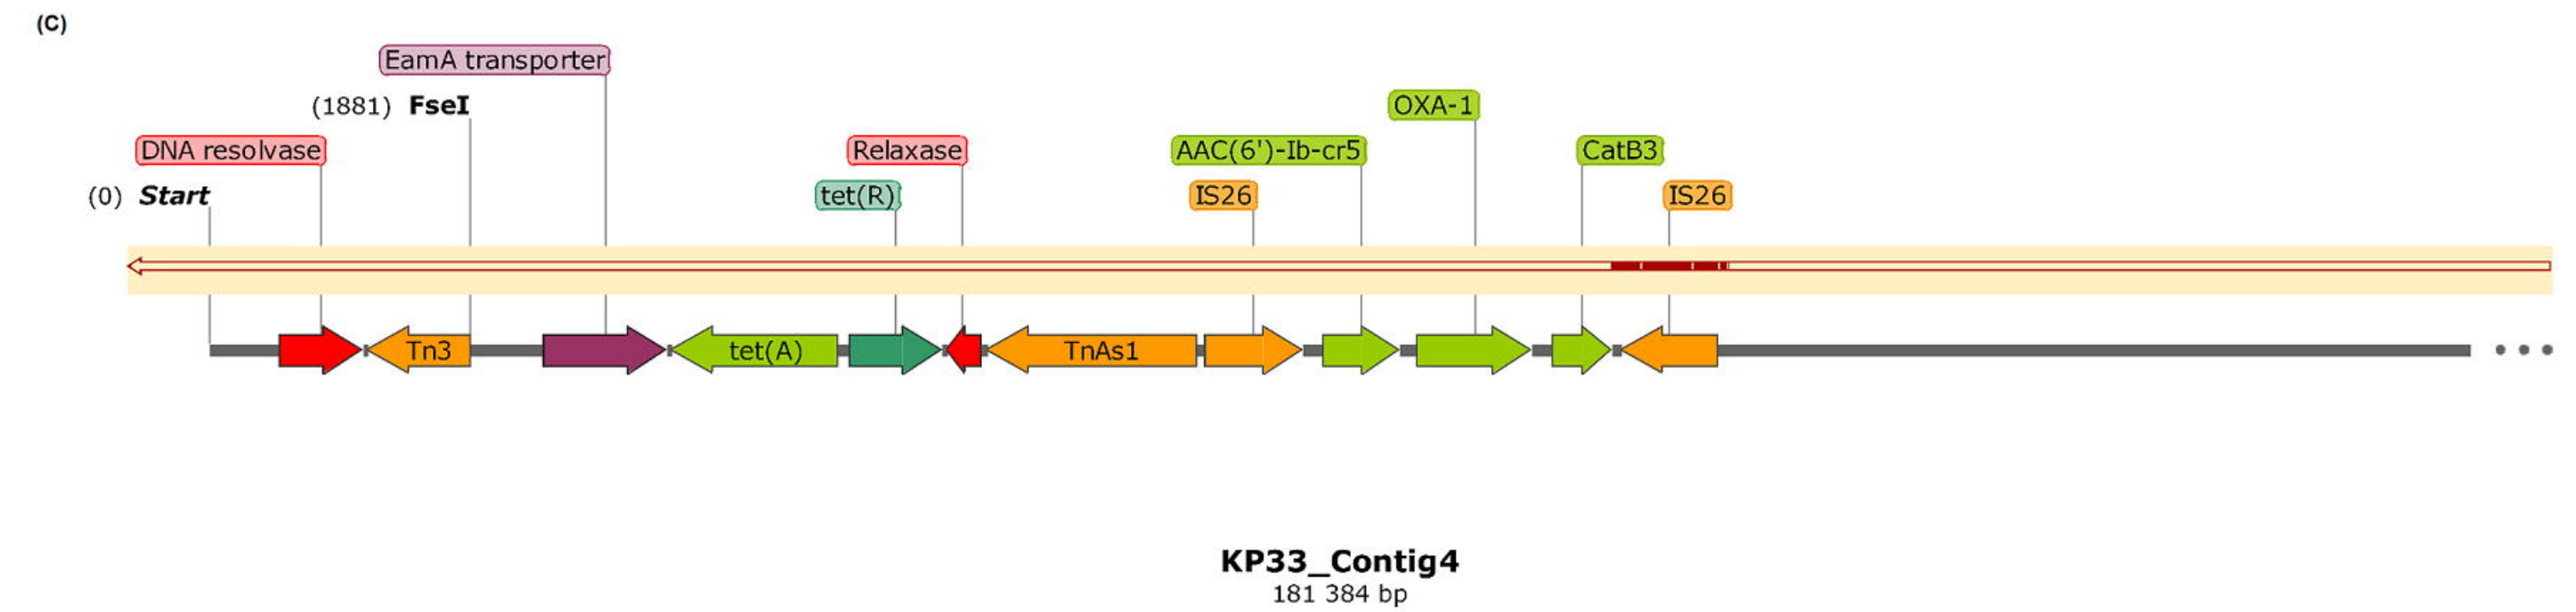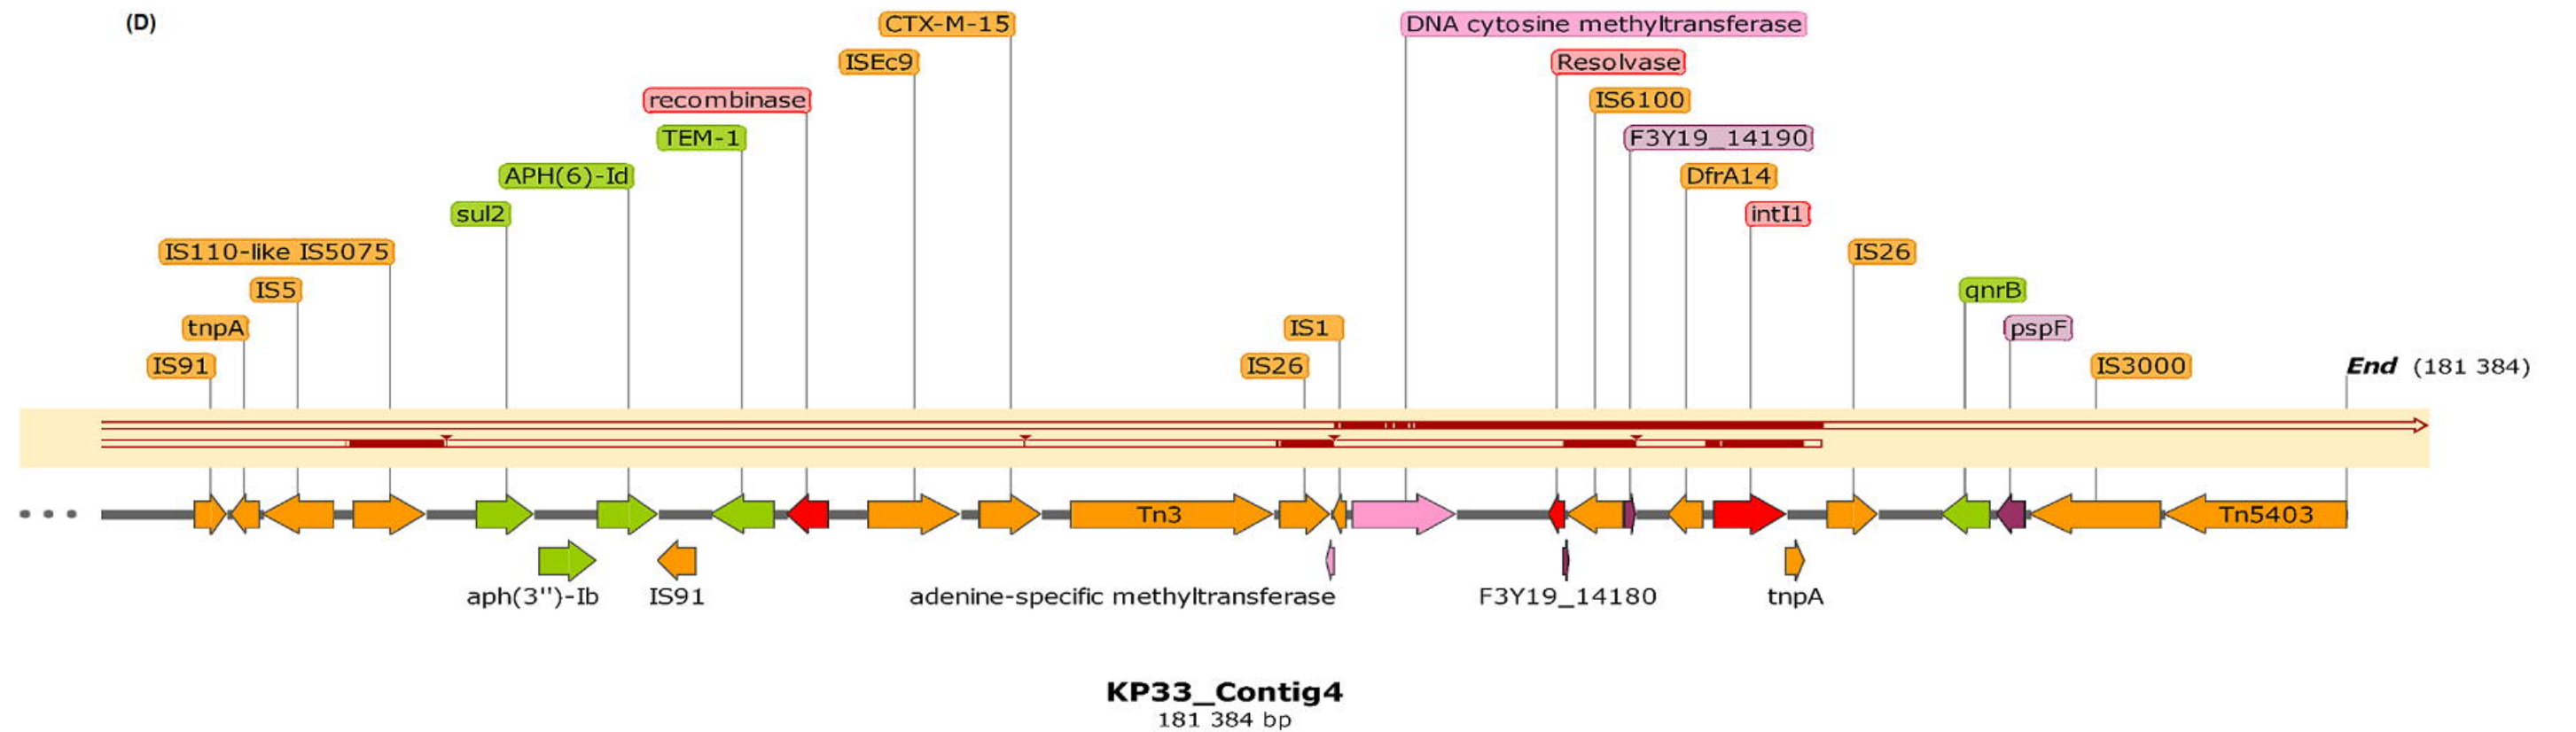

medRxiv preprint doi: <https://doi.org/10.1101/2020.06.20.20135633>; this version posted June 23, 2020. The copyright holder for this preprint (which was not certified by peer review) is the author/funder, who has granted medRxiv a license to display the preprint in perpetuity. It is made available under a [CC-BY-NC-ND 4.0 International license](https://creativecommons.org/licenses/by-nc-nd/4.0/).

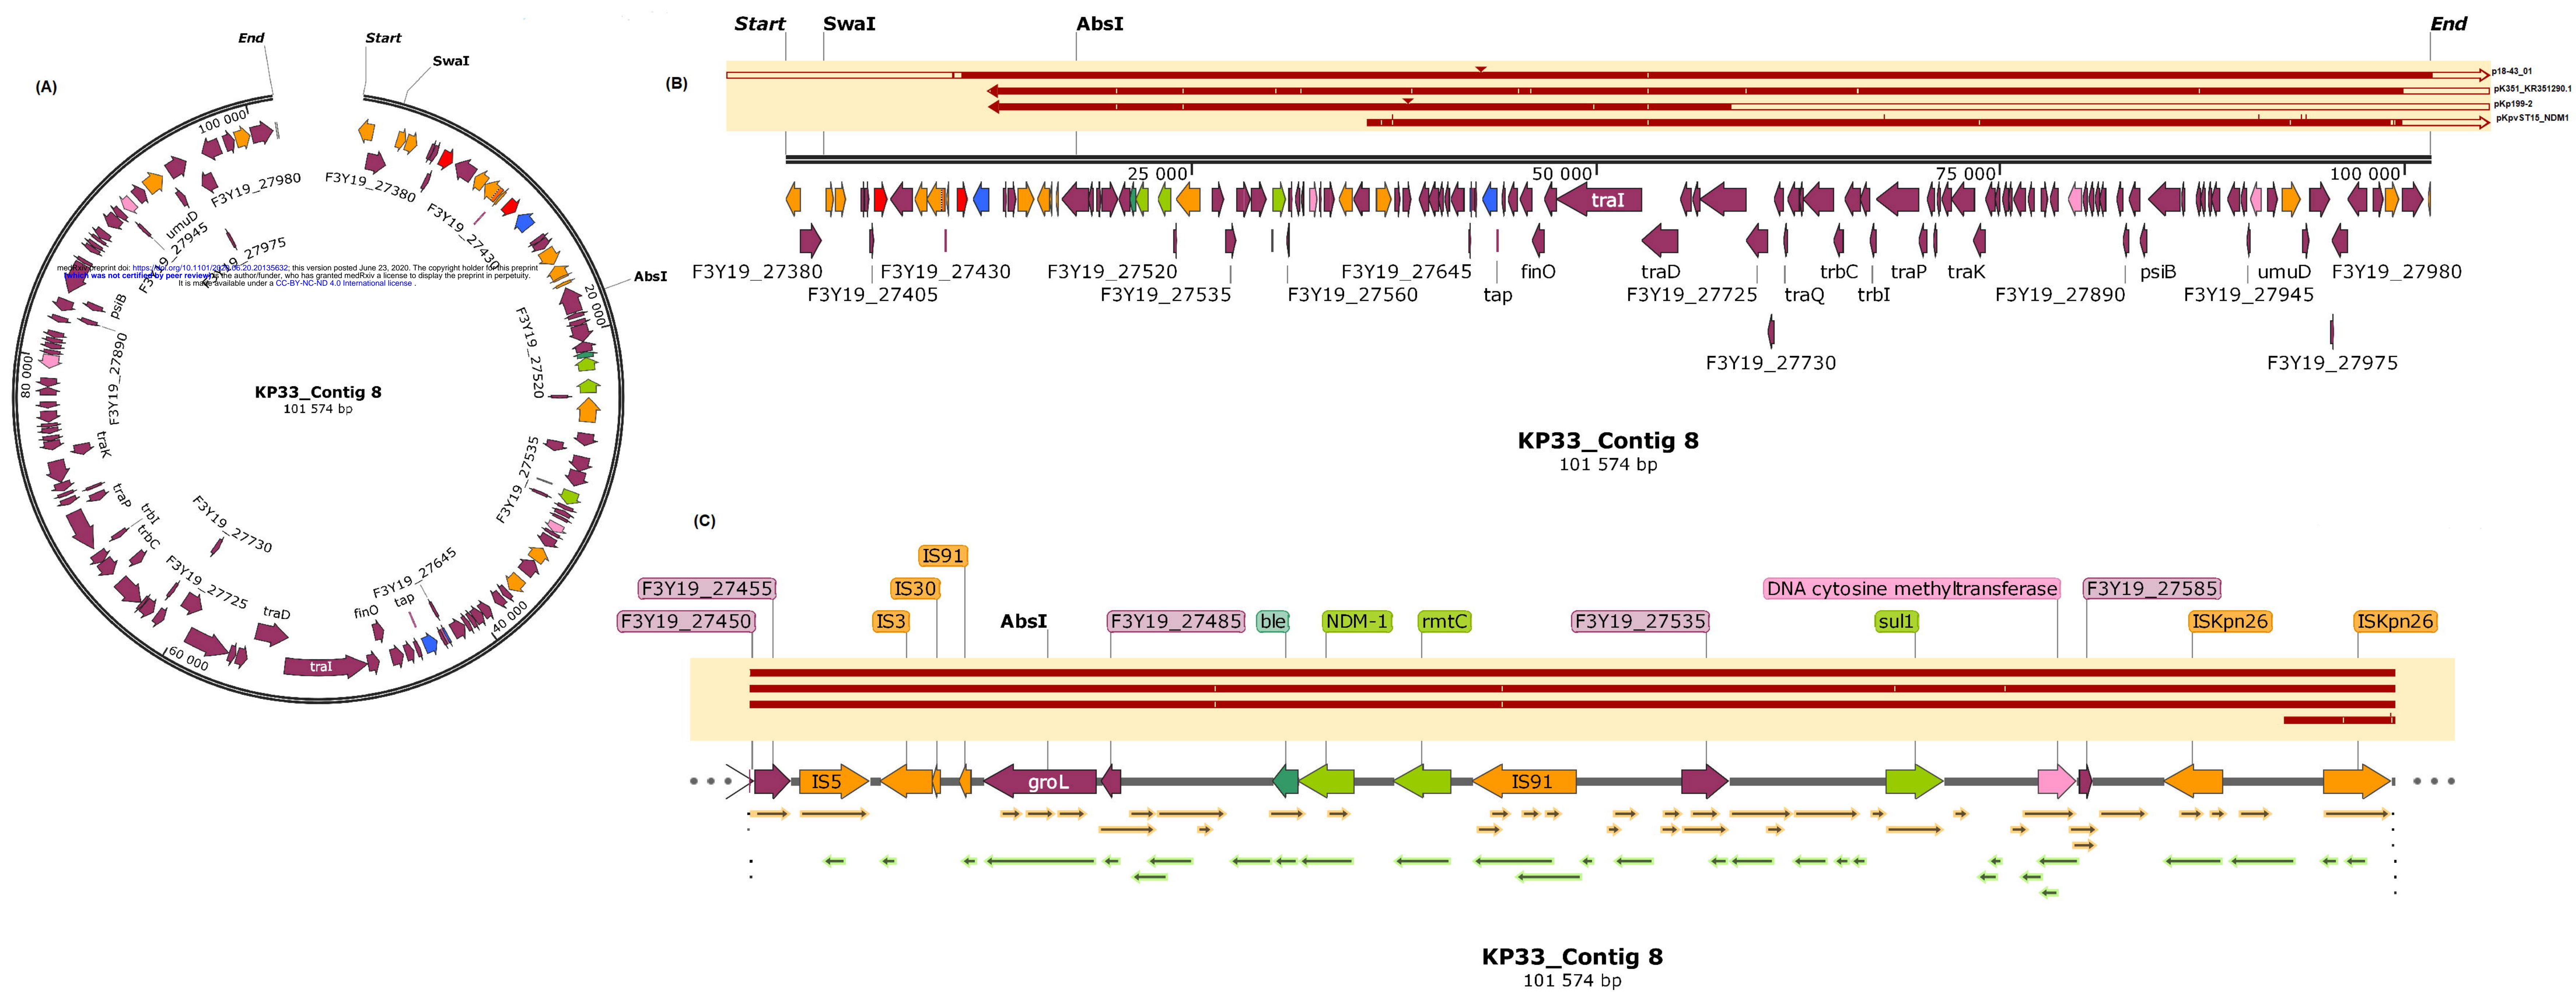

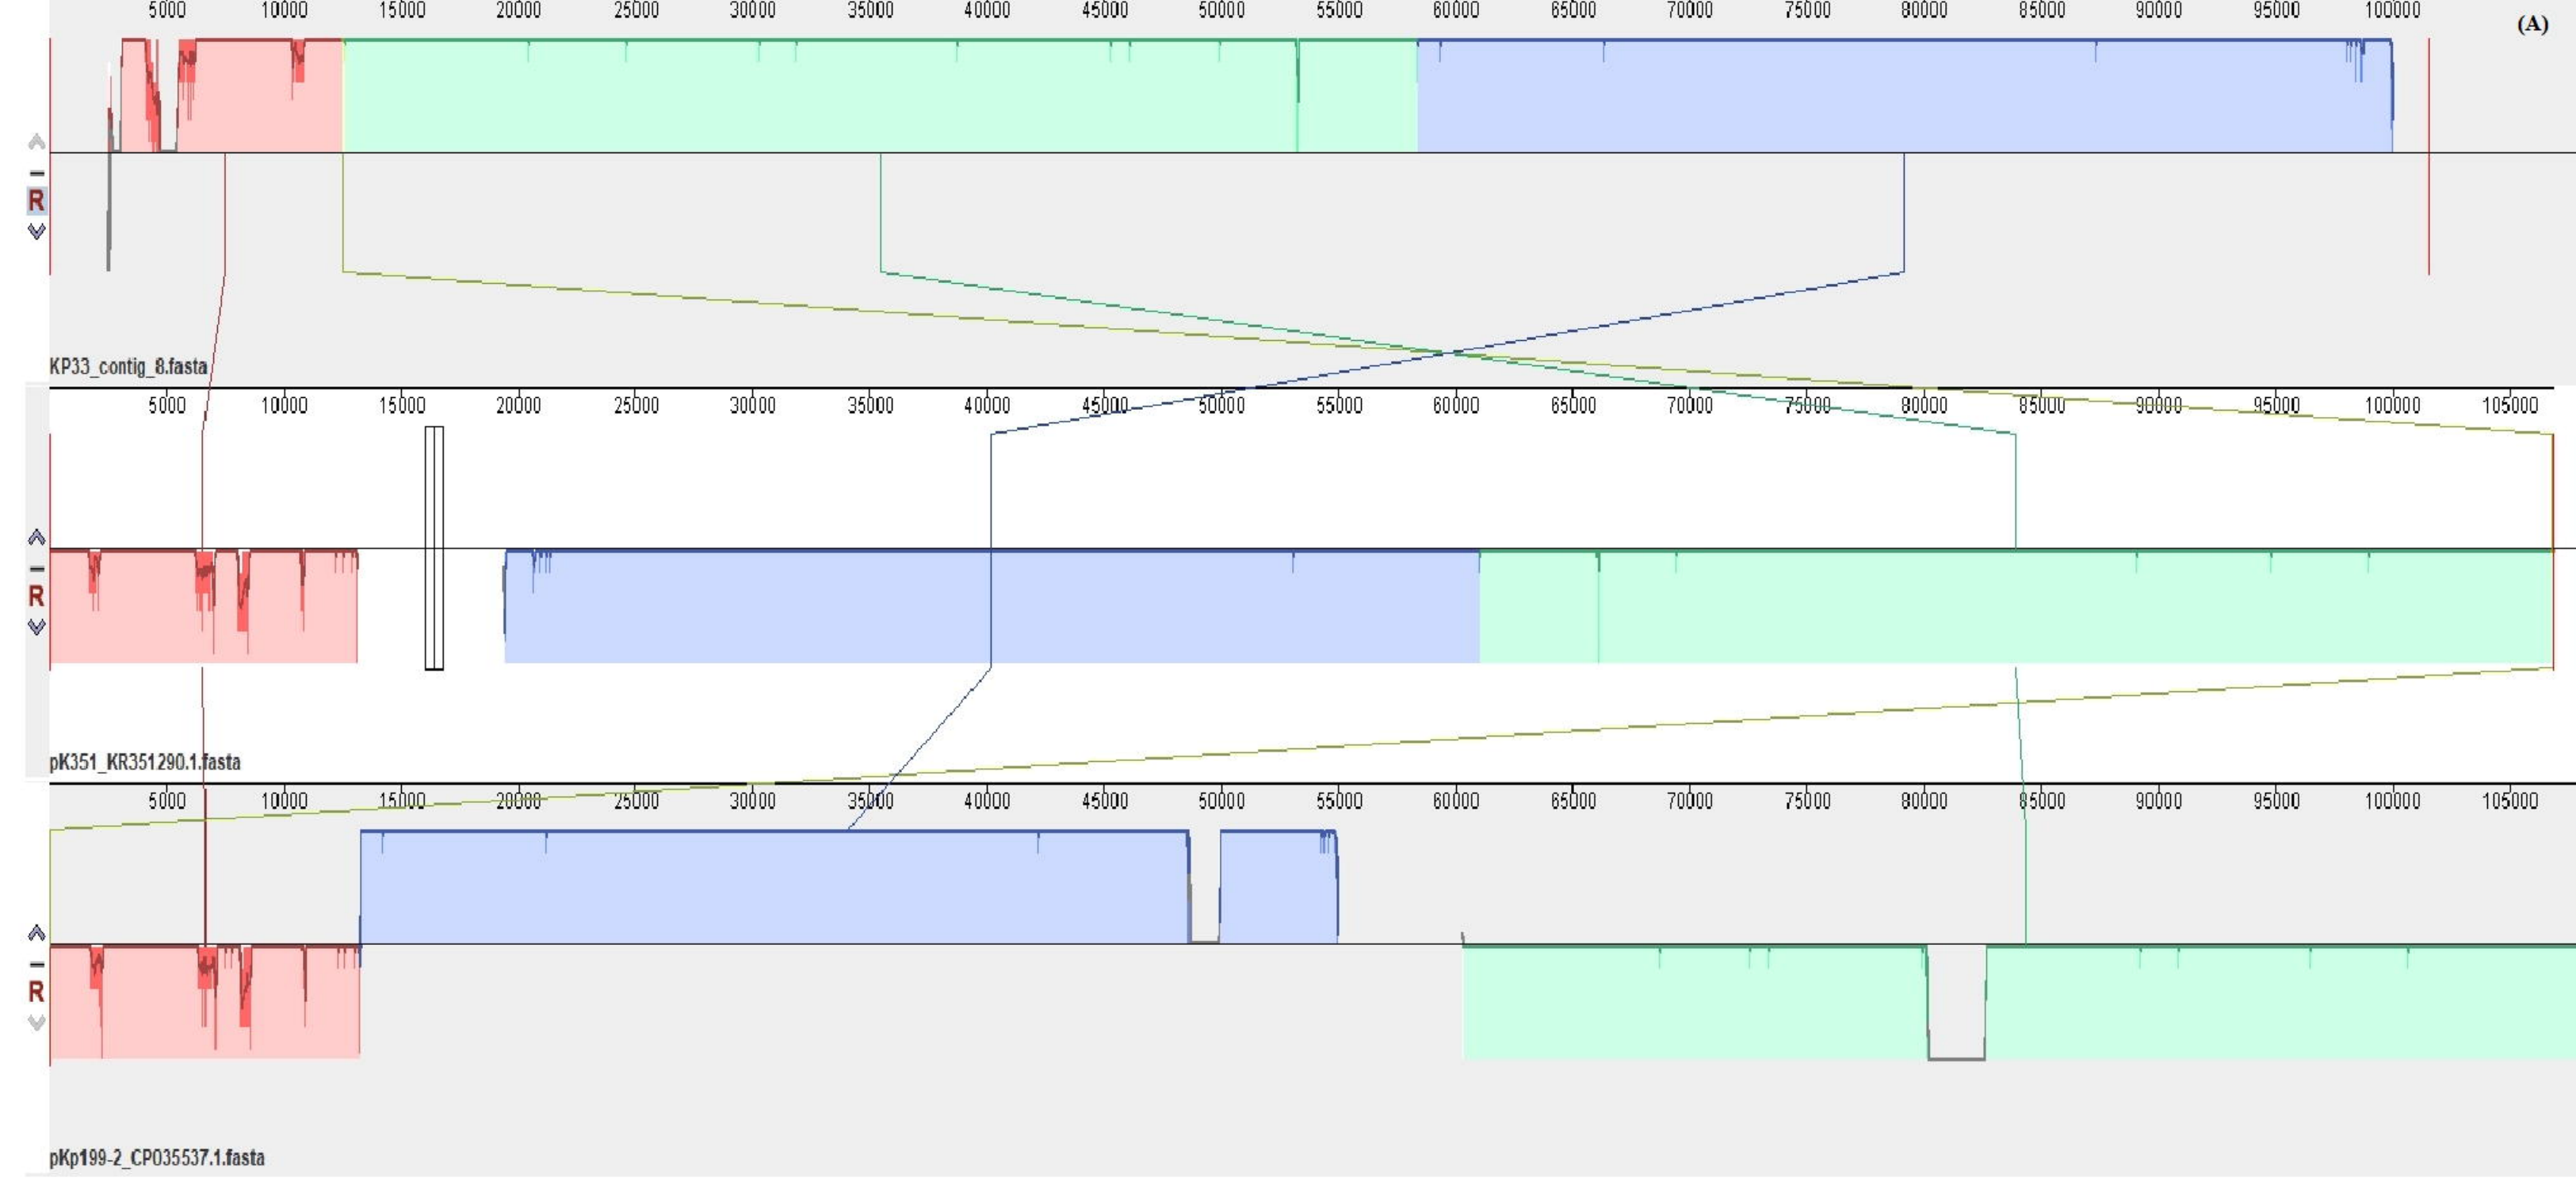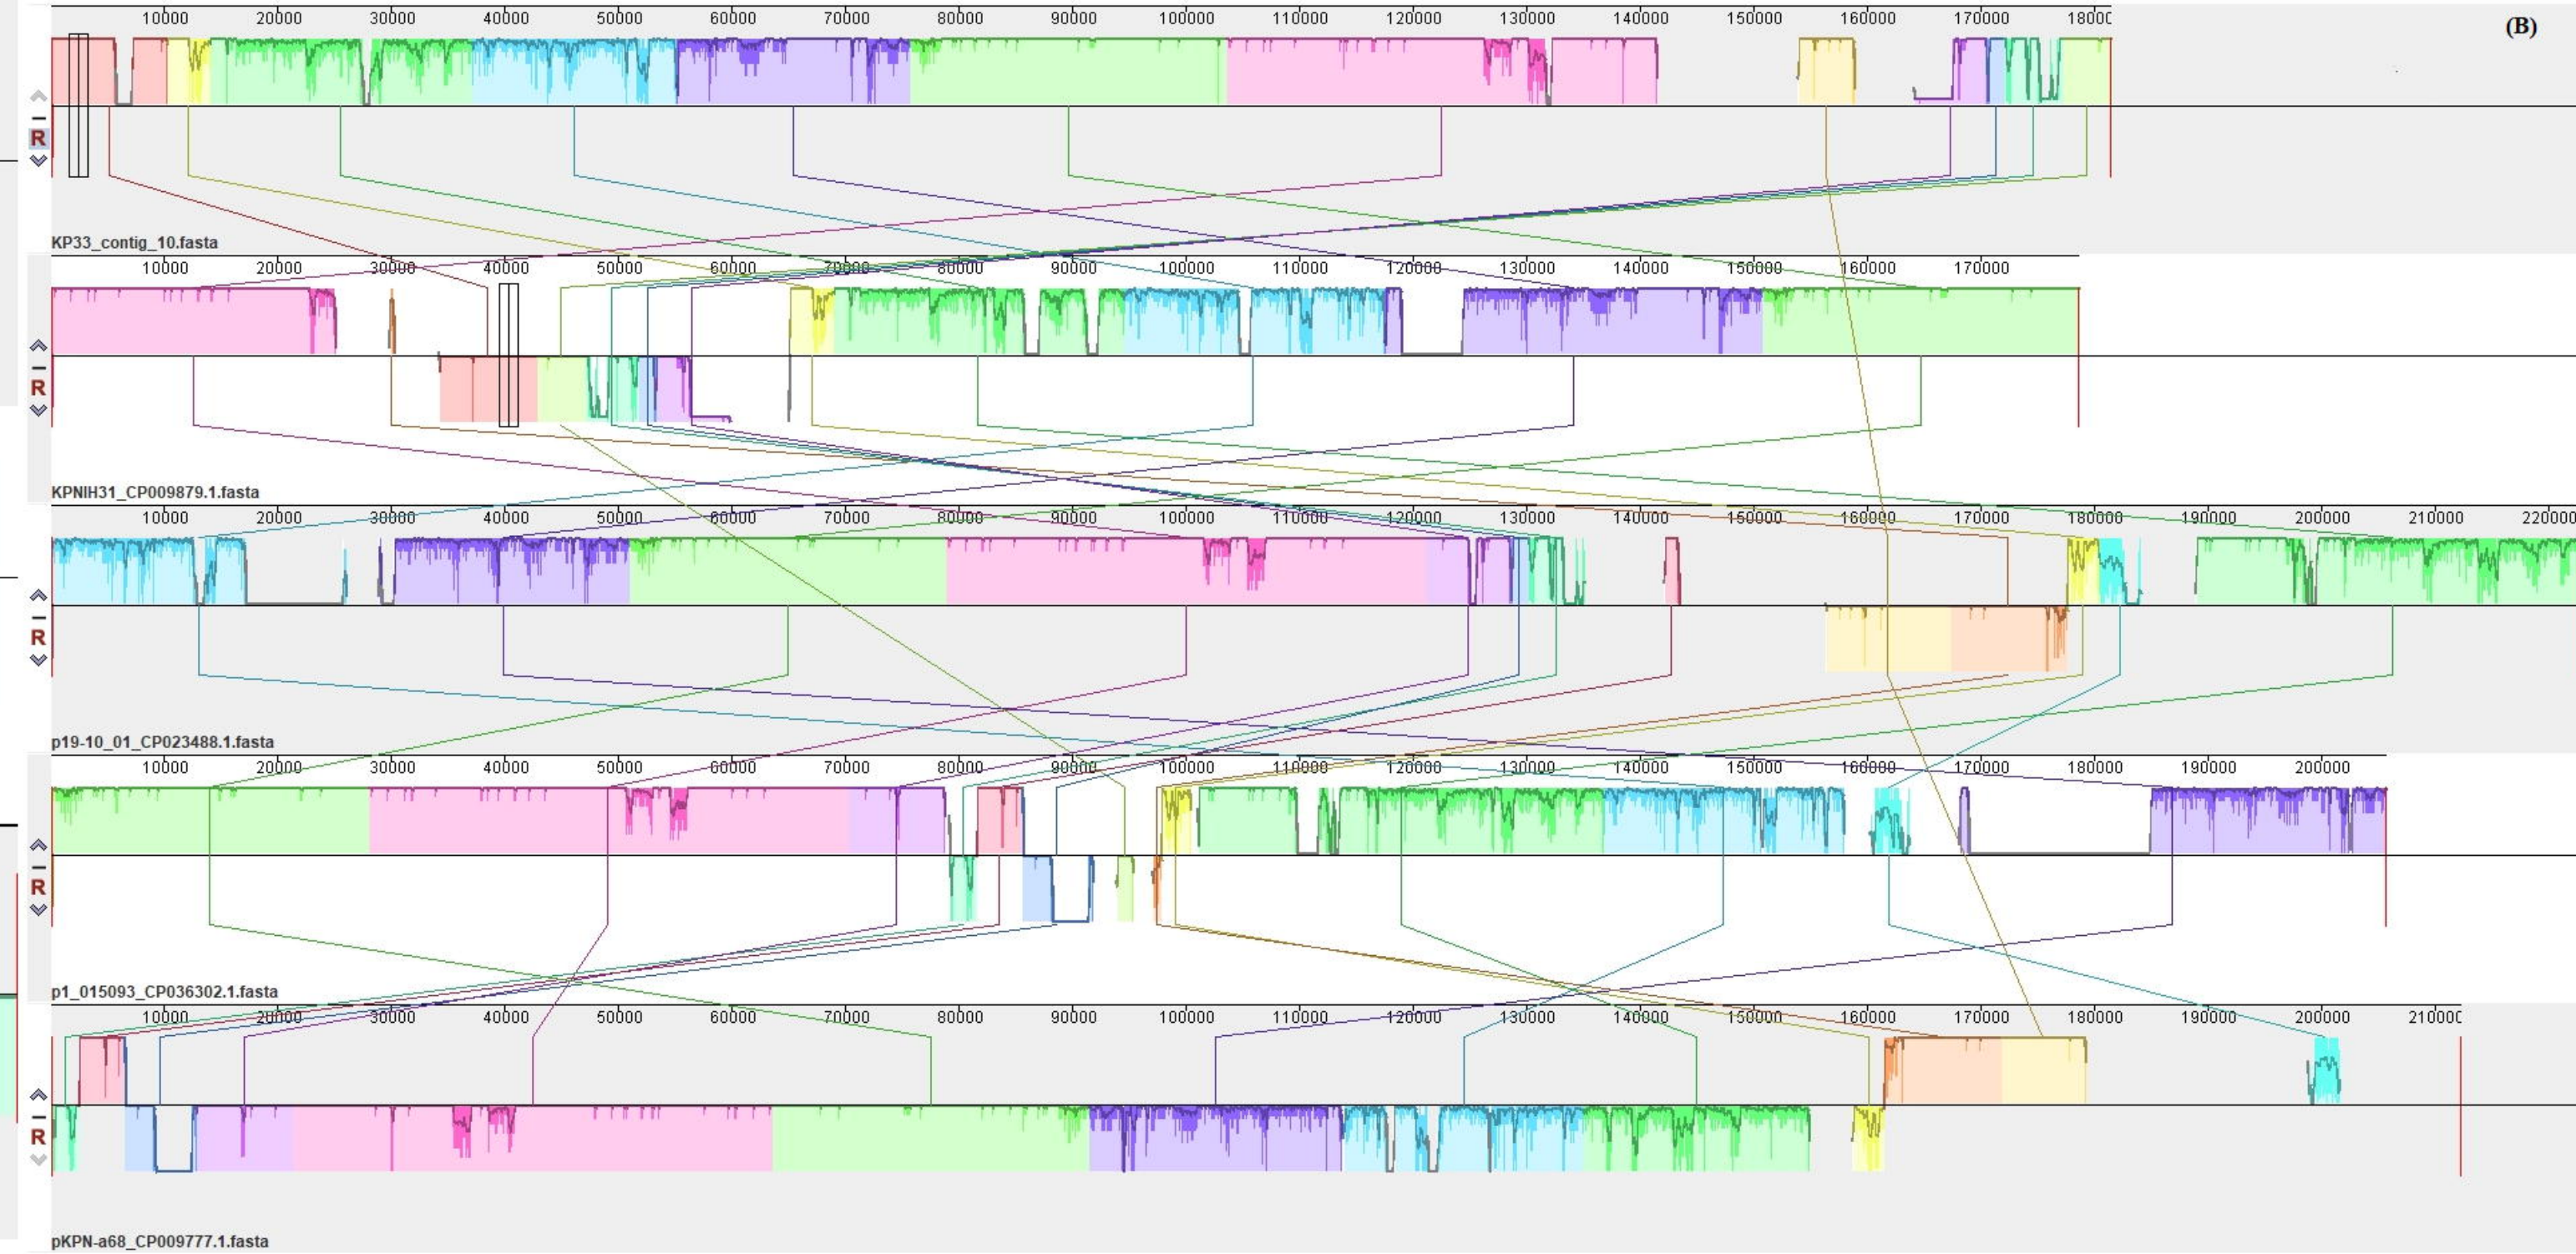

pKPN-a68\_CP009777.1.fasta

## KP8 configs

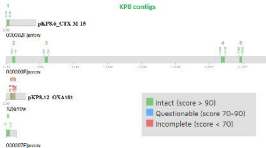

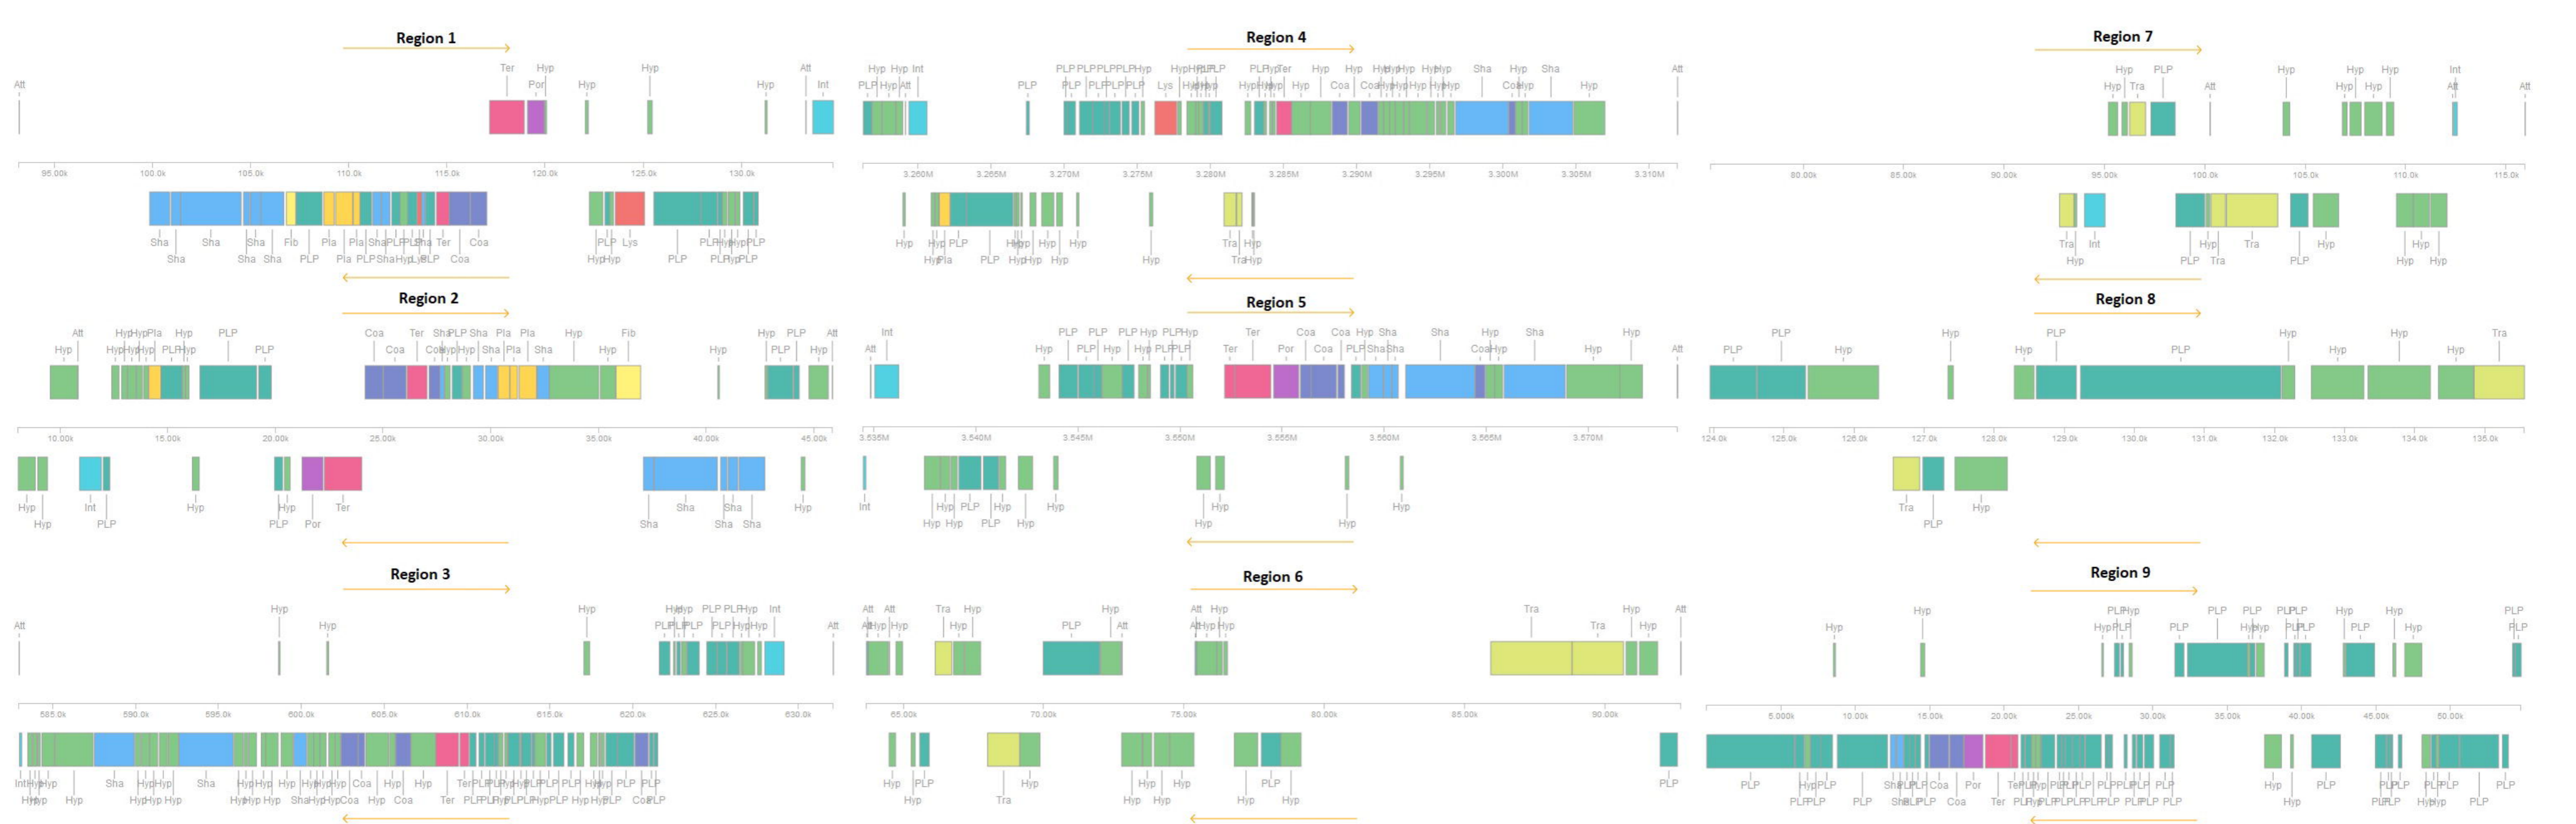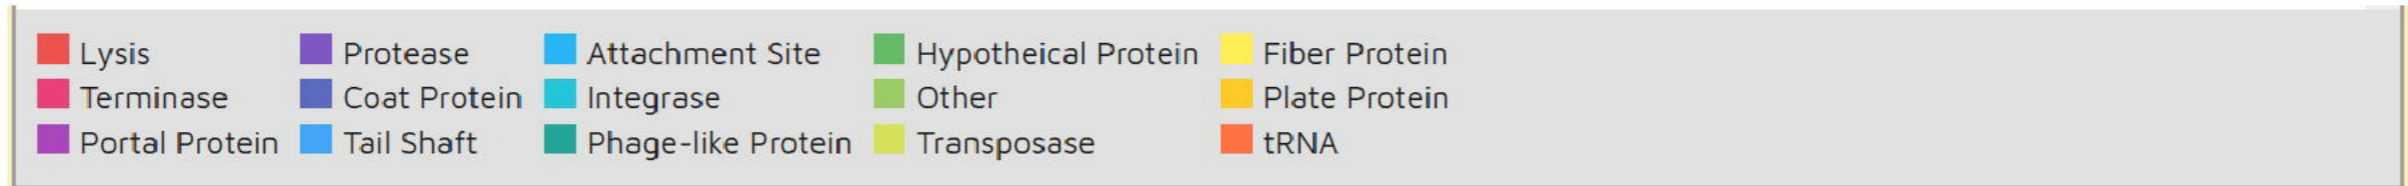

## KP10 contigs

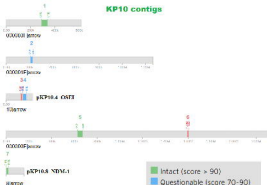

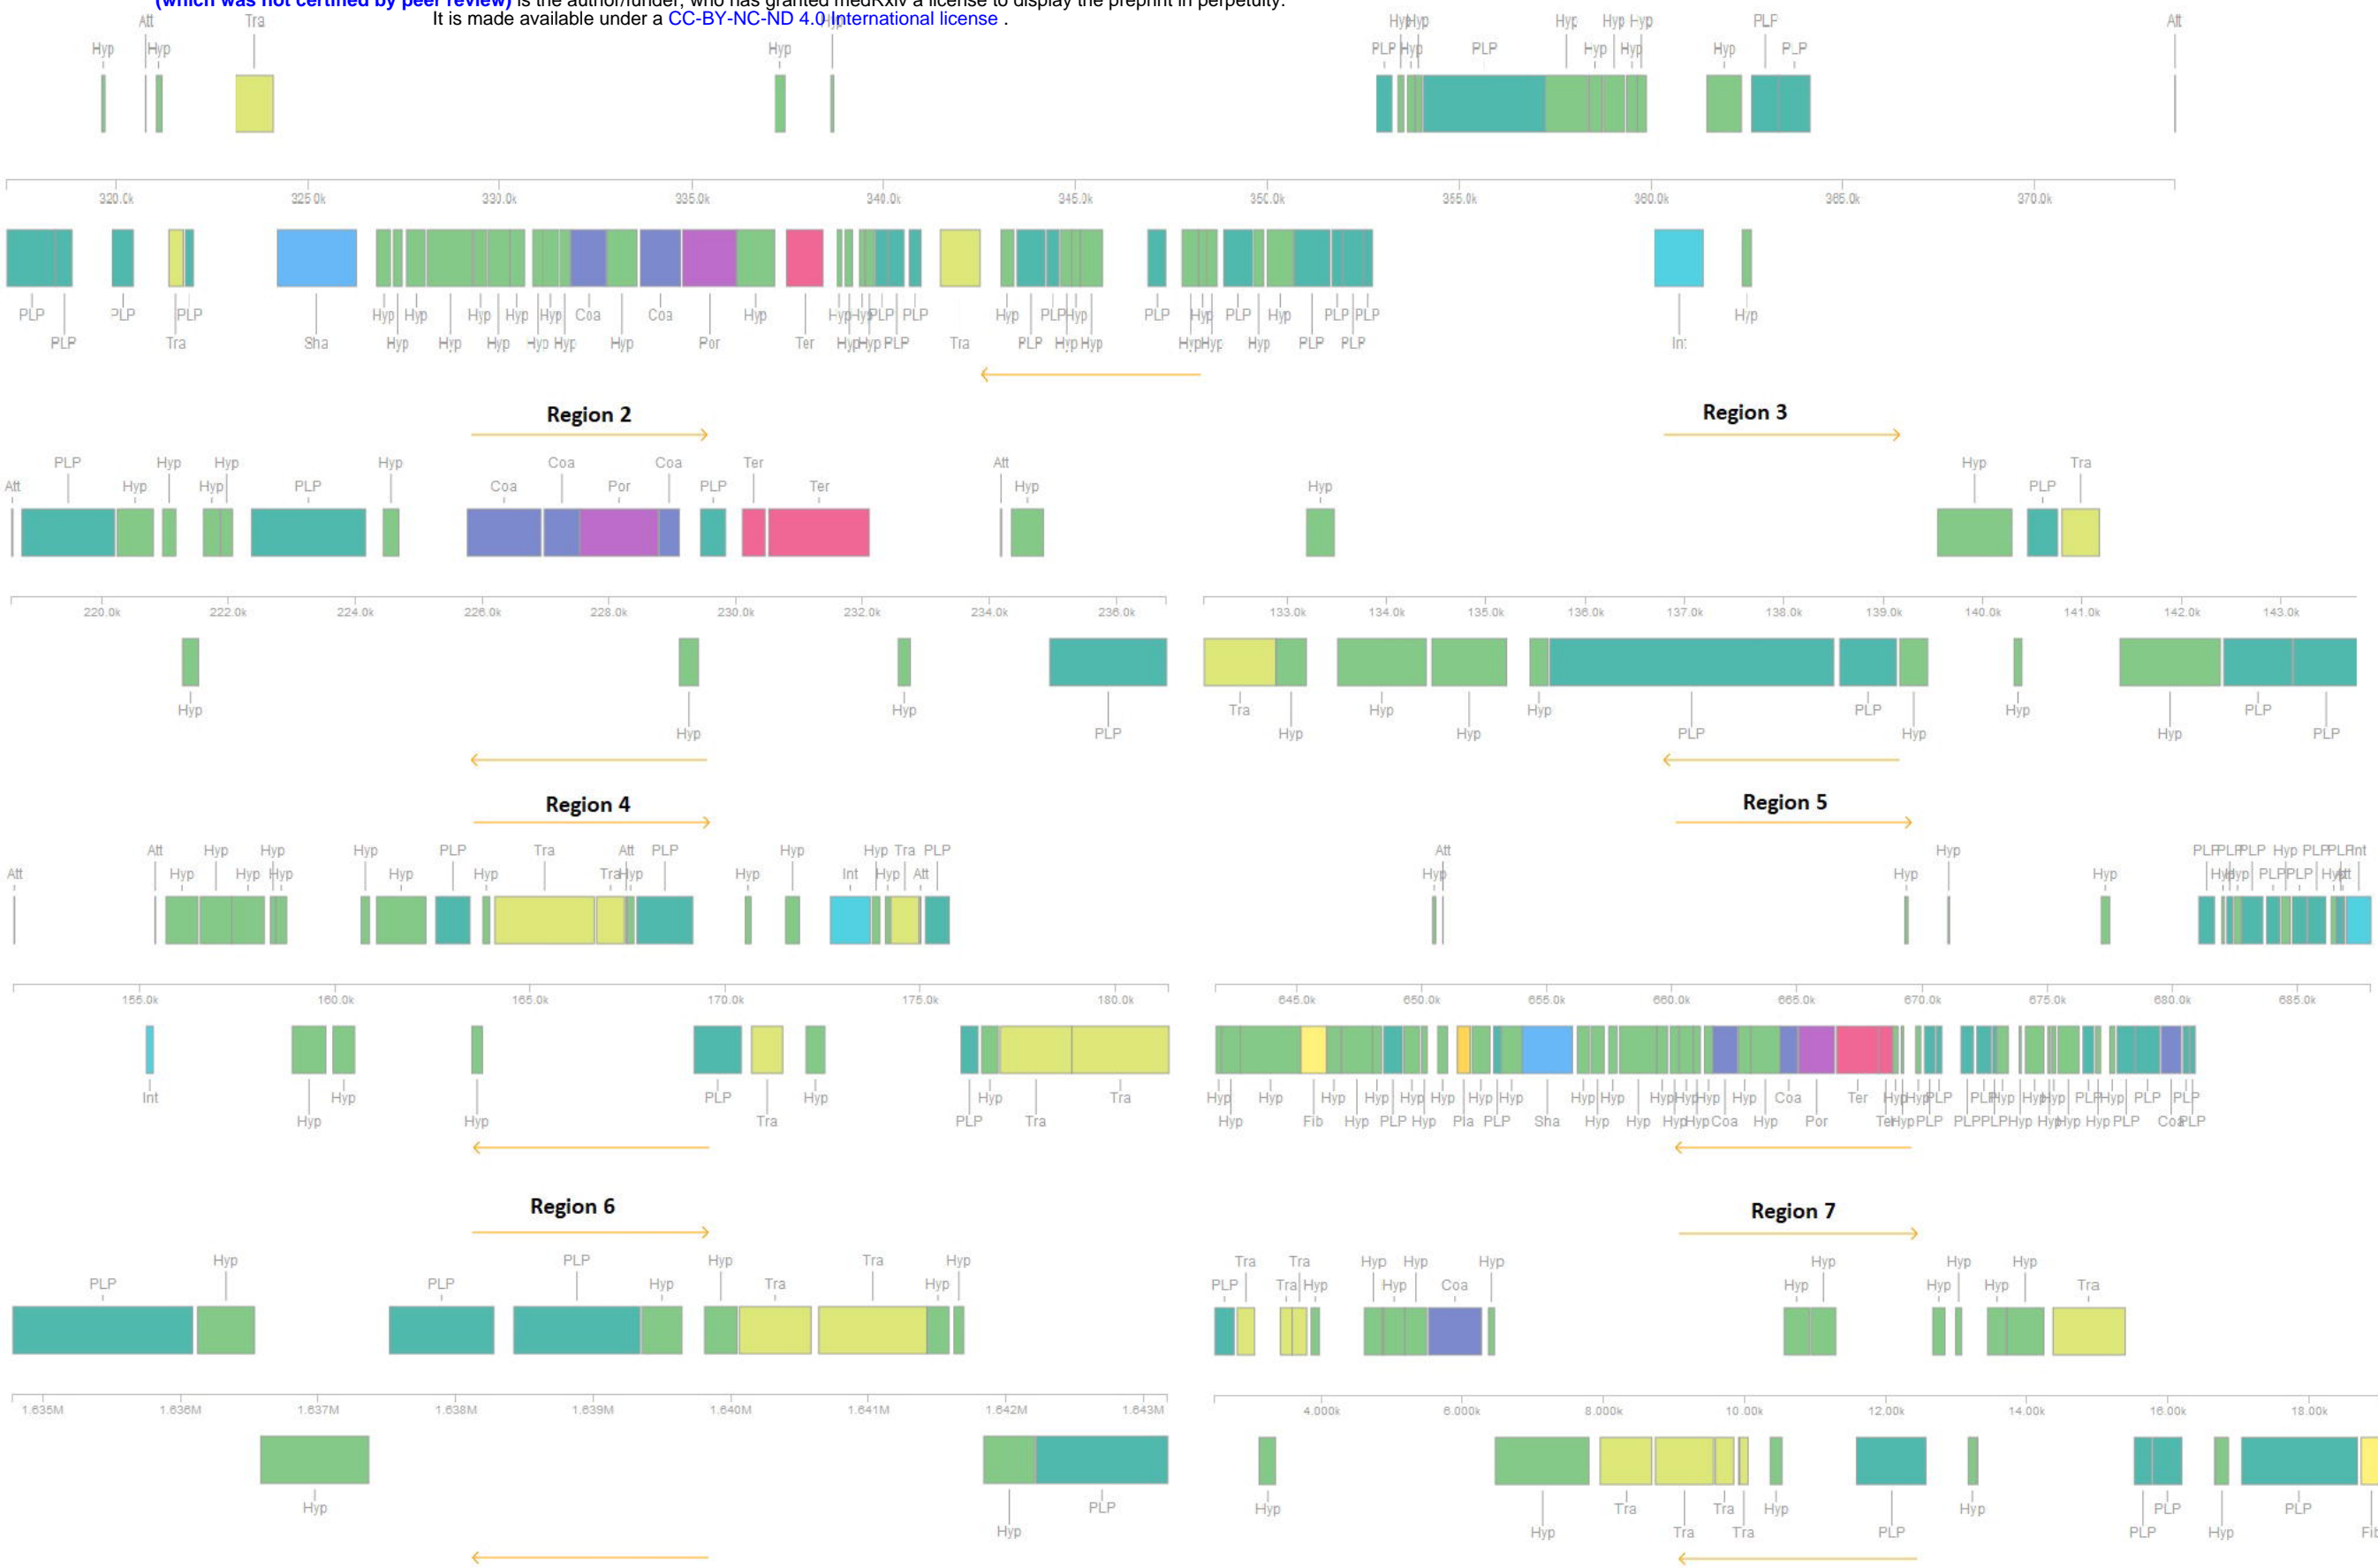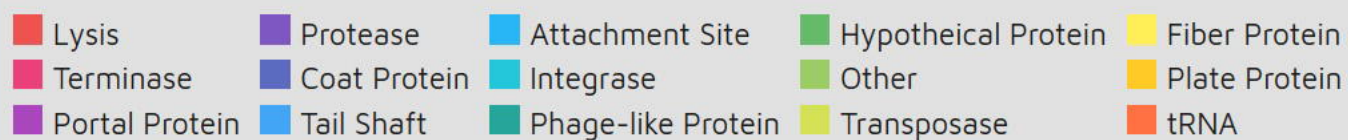



## KP15 contigs

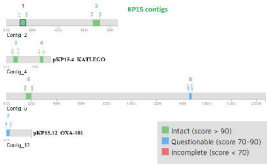

### Region 1

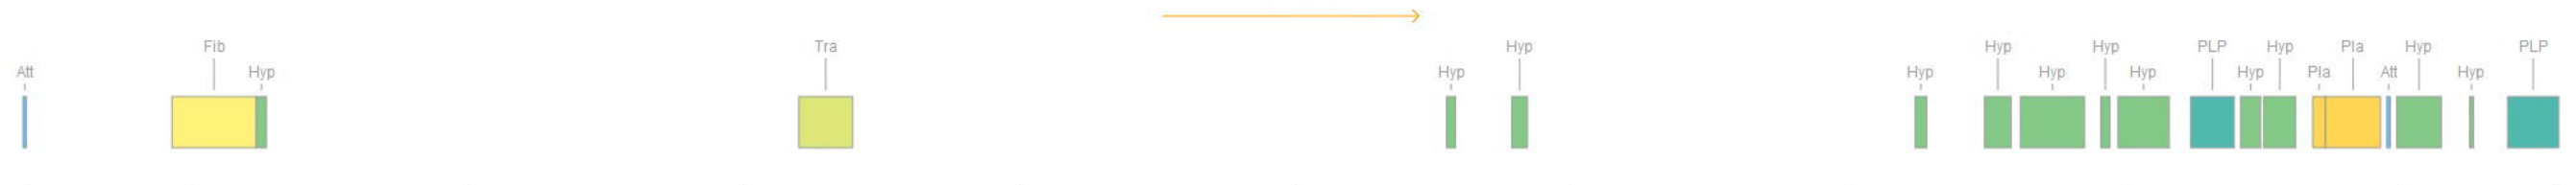

medRxiv preprint doi: <https://doi.org/10.1101/2020.06.20.20135632>; this version posted June 23, 2020. The copyright holder for this preprint (which was not certified by peer review) is the author/funder, who has granted medRxiv a license to display the preprint in perpetuity. It is made available under a [CC-BY-NC-ND 4.0 International license](https://creativecommons.org/licenses/by-nc-nd/4.0/).

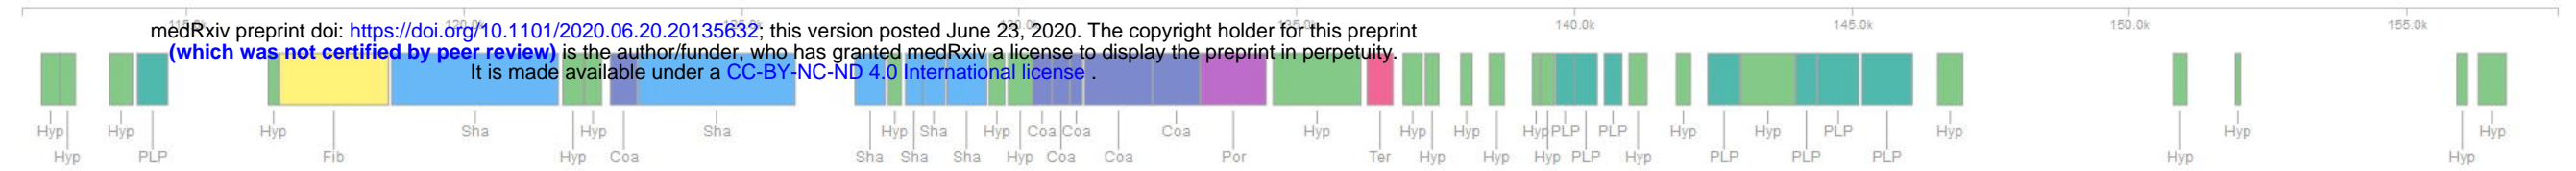

### Region 2

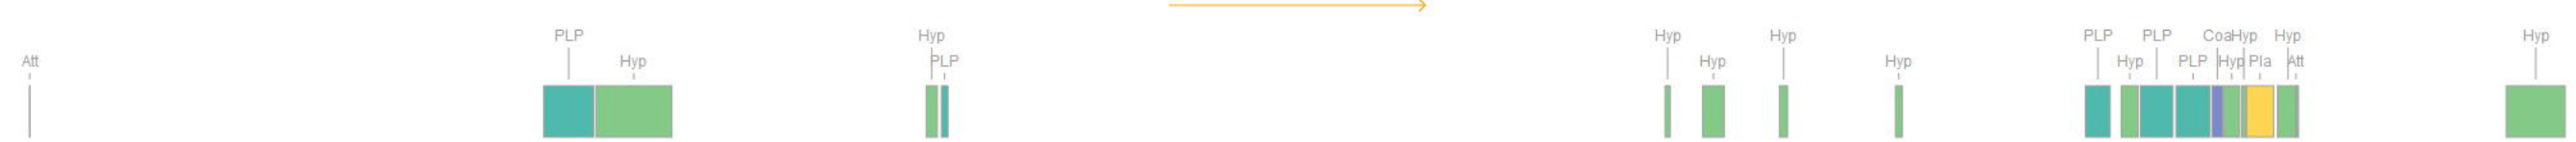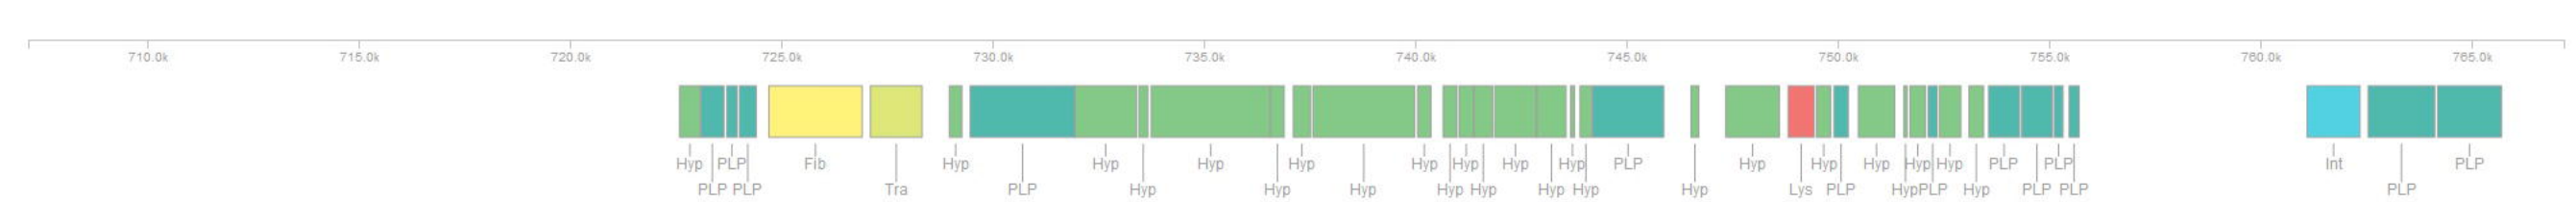

### Region 3

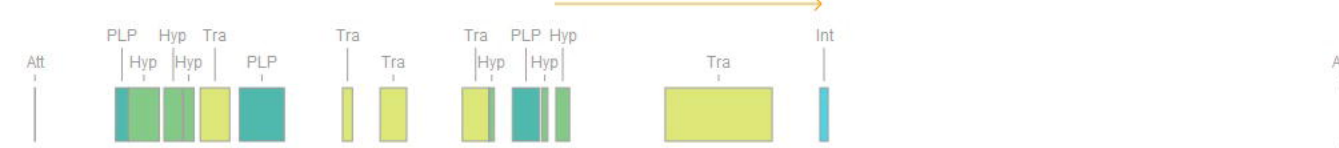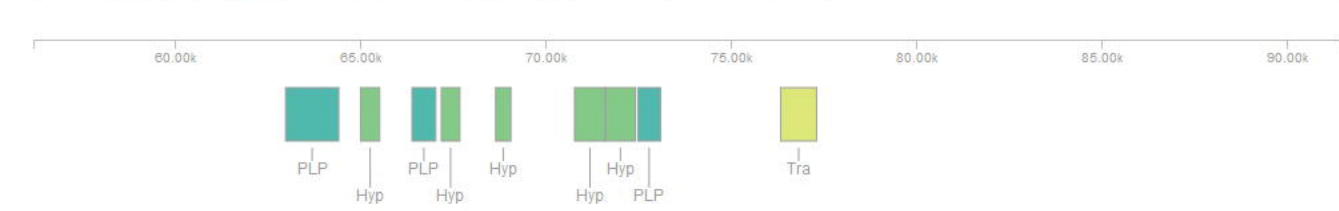

### Region 4

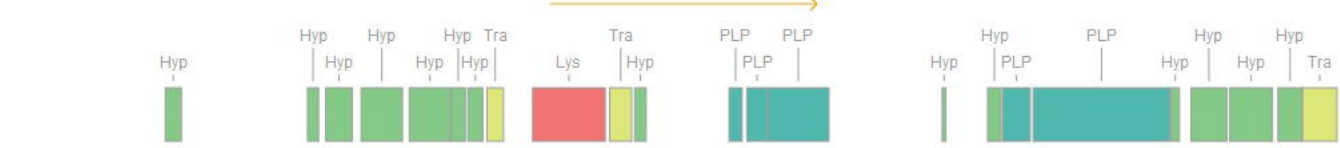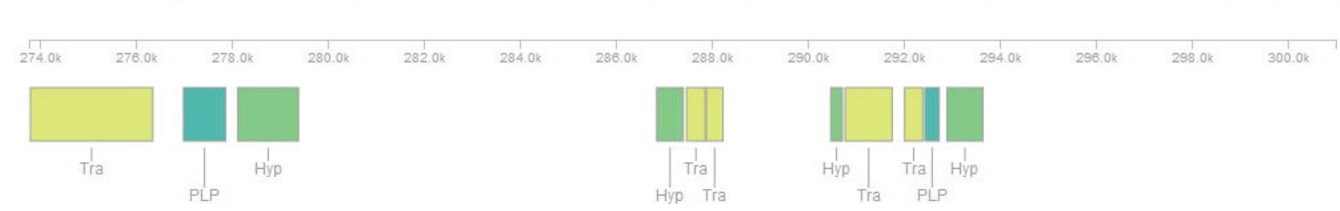

### Region 5

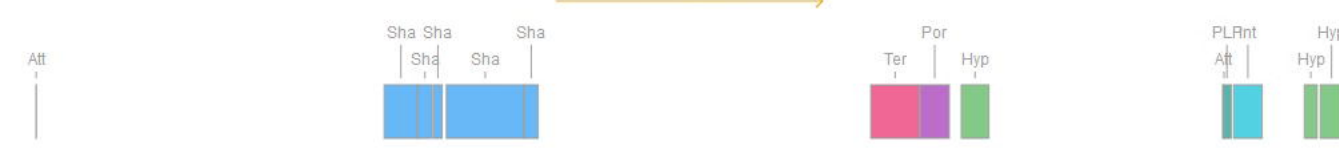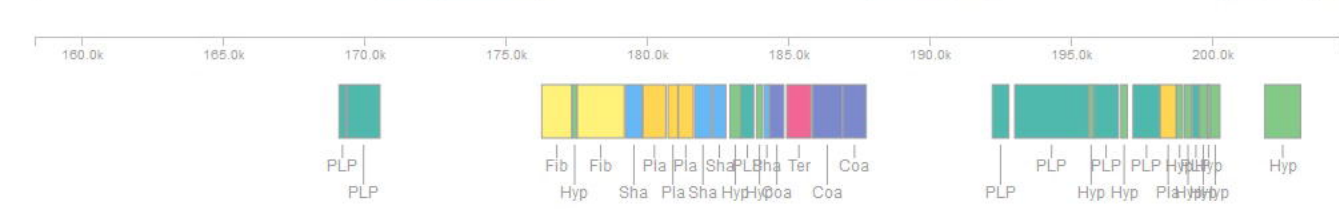

### Region 6

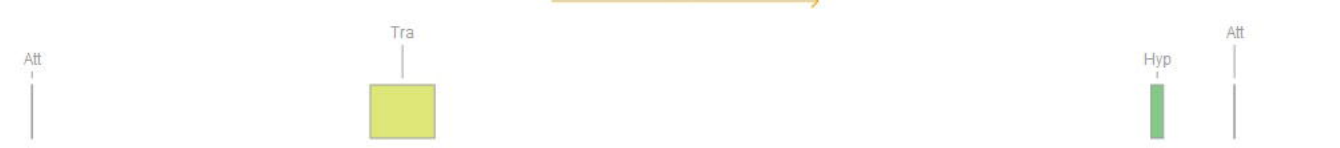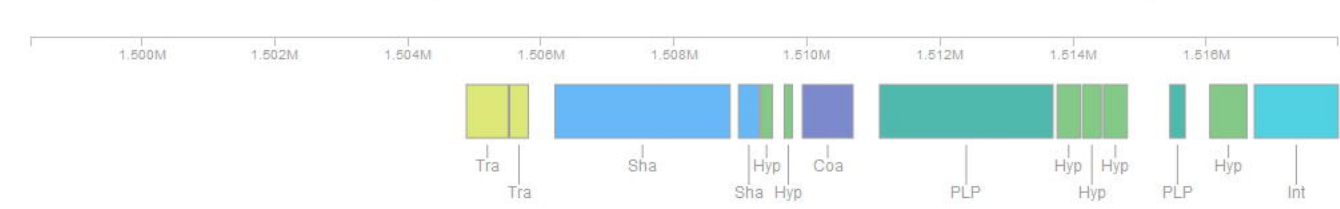

### Region 7

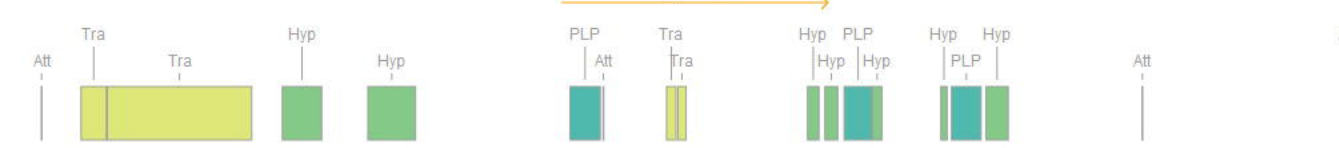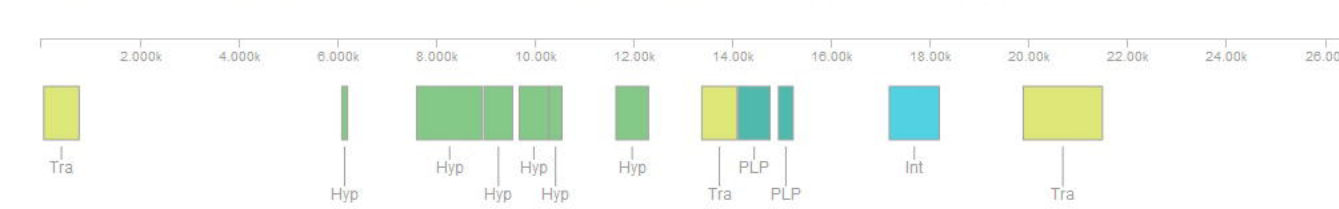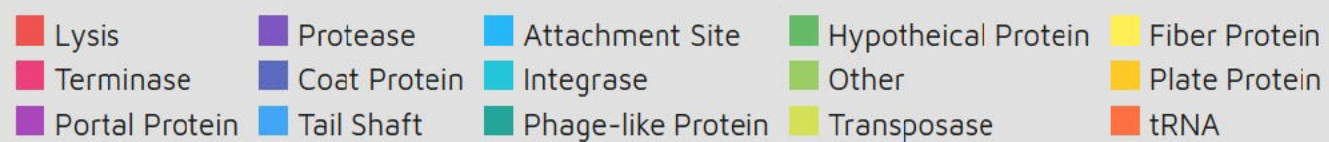

## KP29 contigs

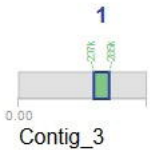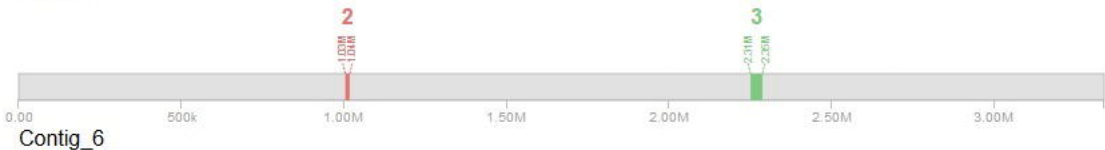

**3**

2.21M 2.25M

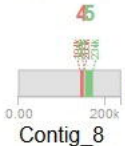

**pKP29.8\_CTXM-15**

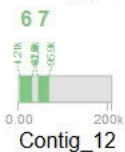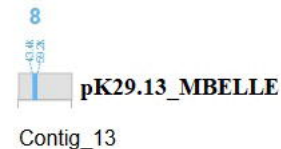

- Intact (score > 90)
- Questionable (score 70-90)
- Incomplete (score < 70)

**Region 1**

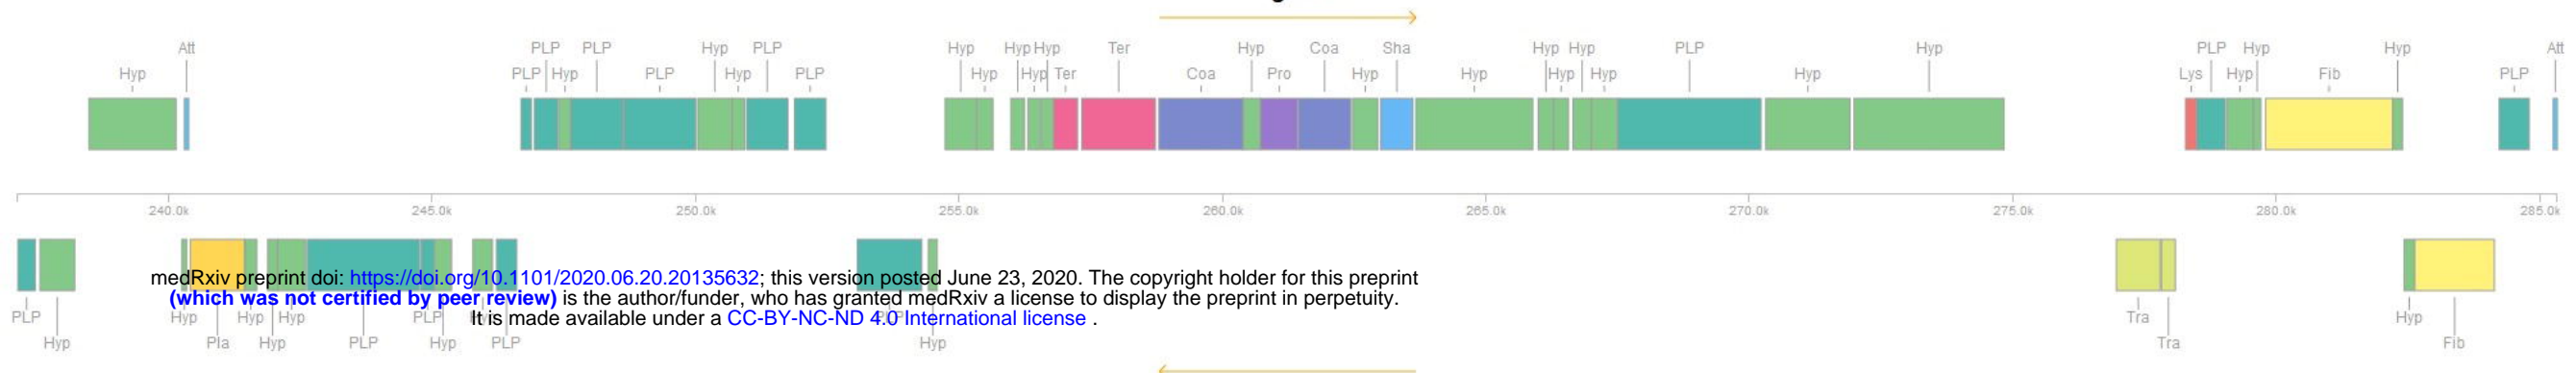

**Region 2**

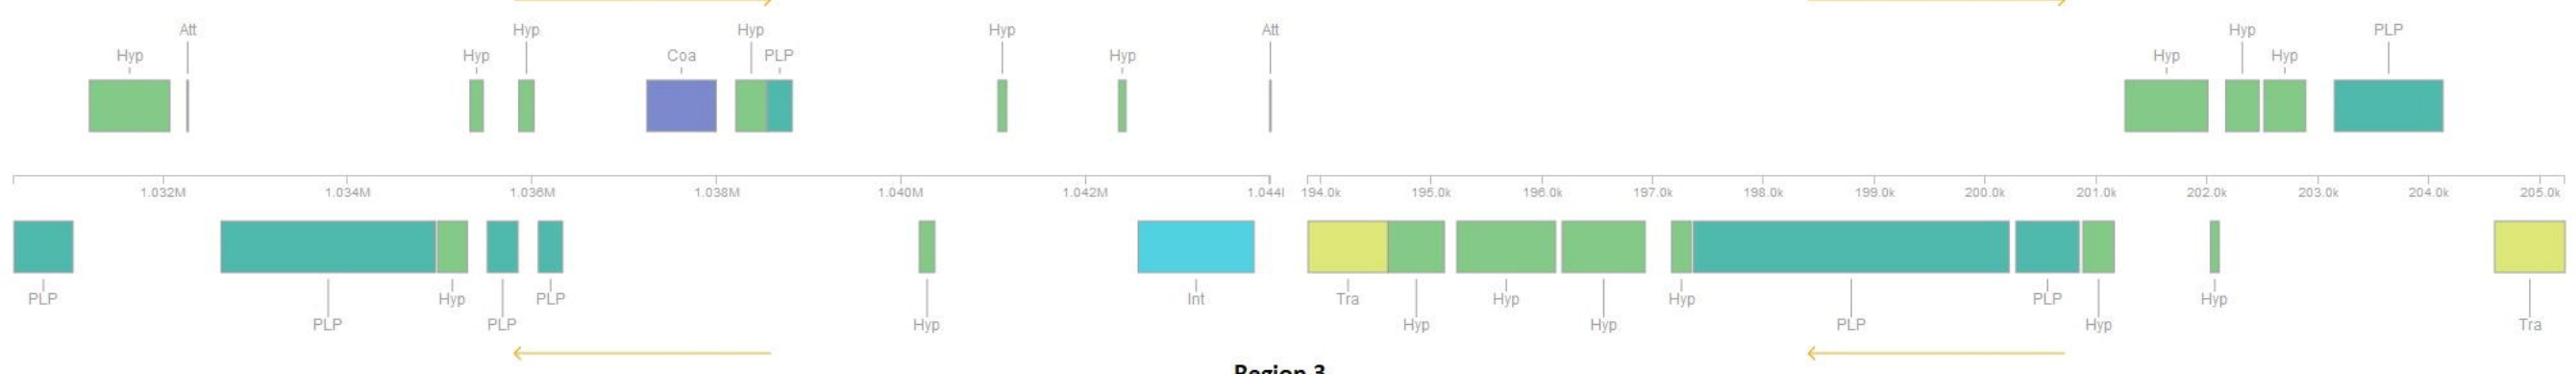

**Region 4**

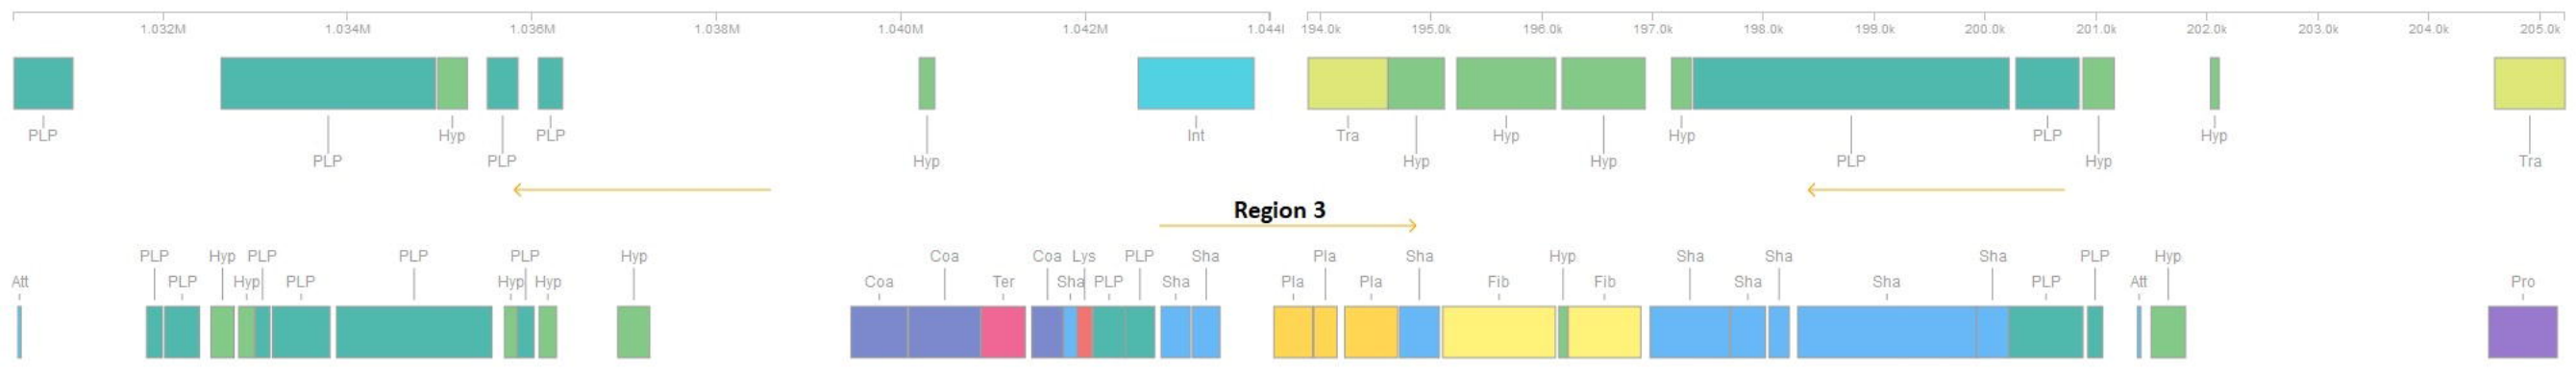

**Region 3**

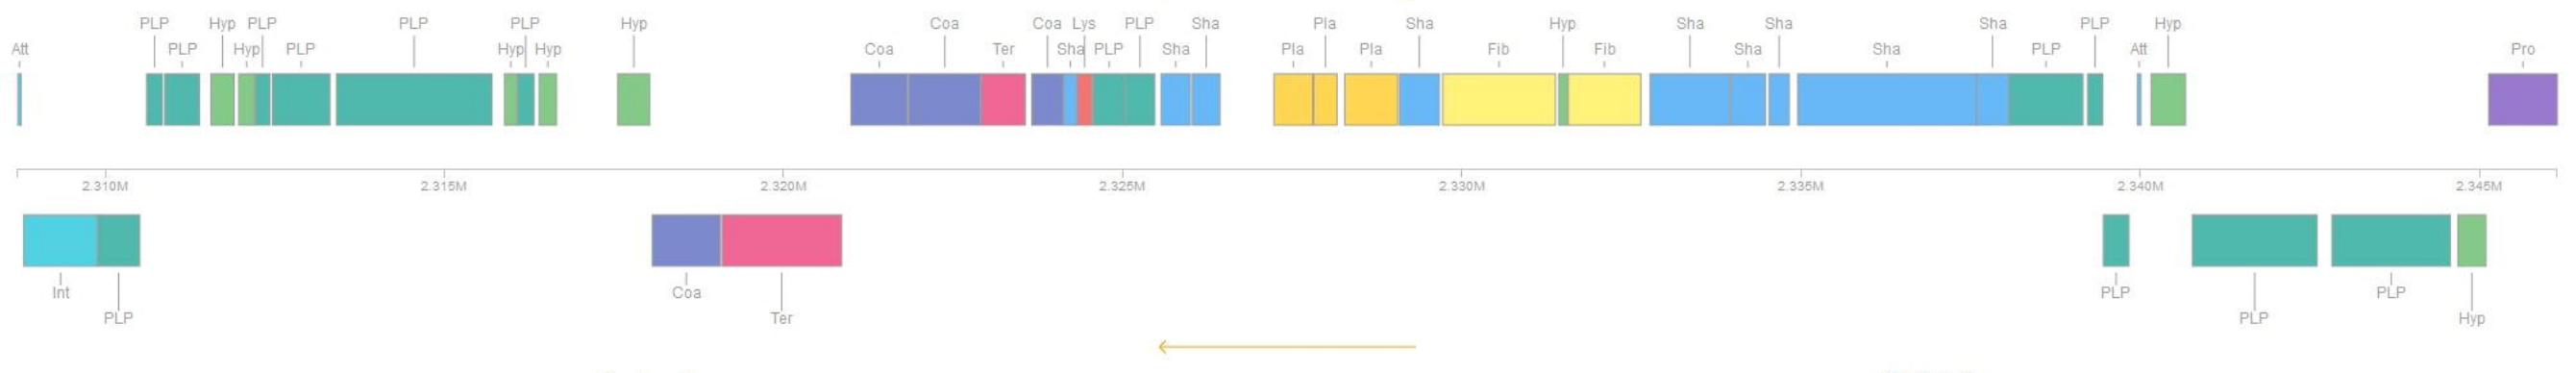

**Region 5**

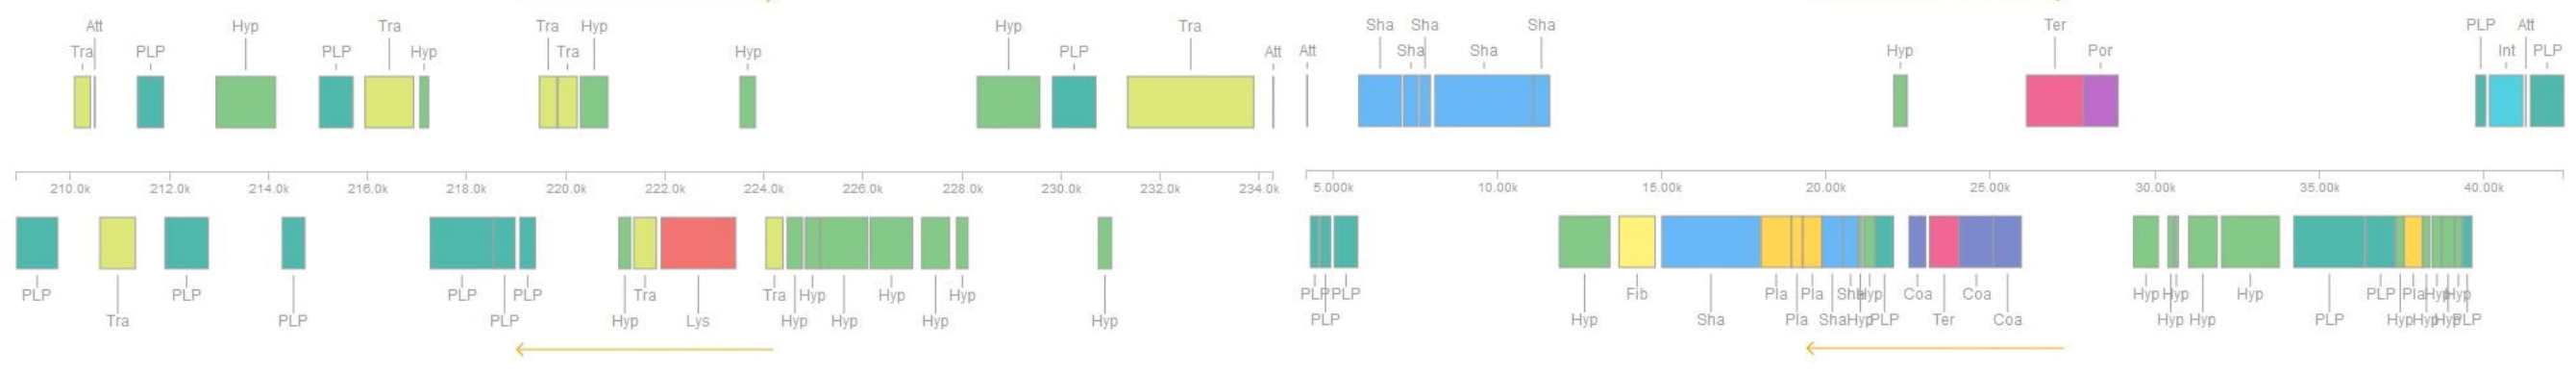

**Region 6**

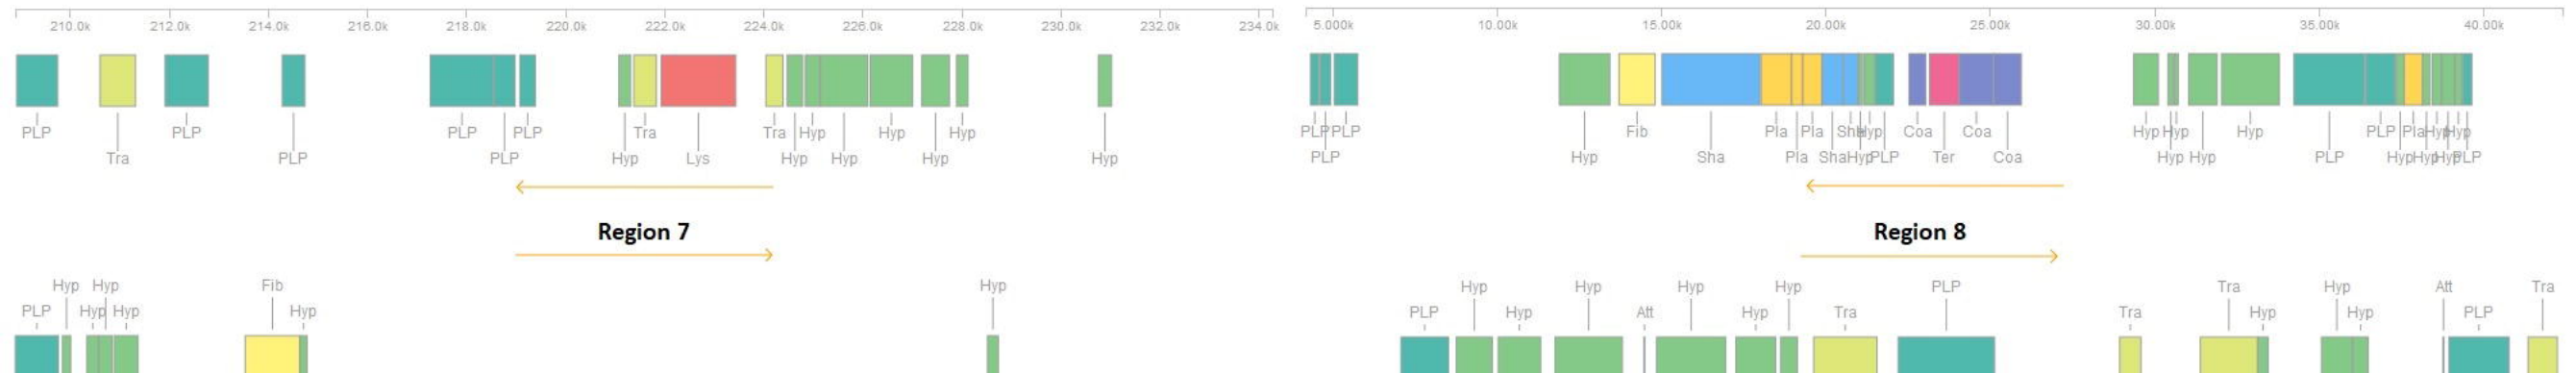

**Region 7**

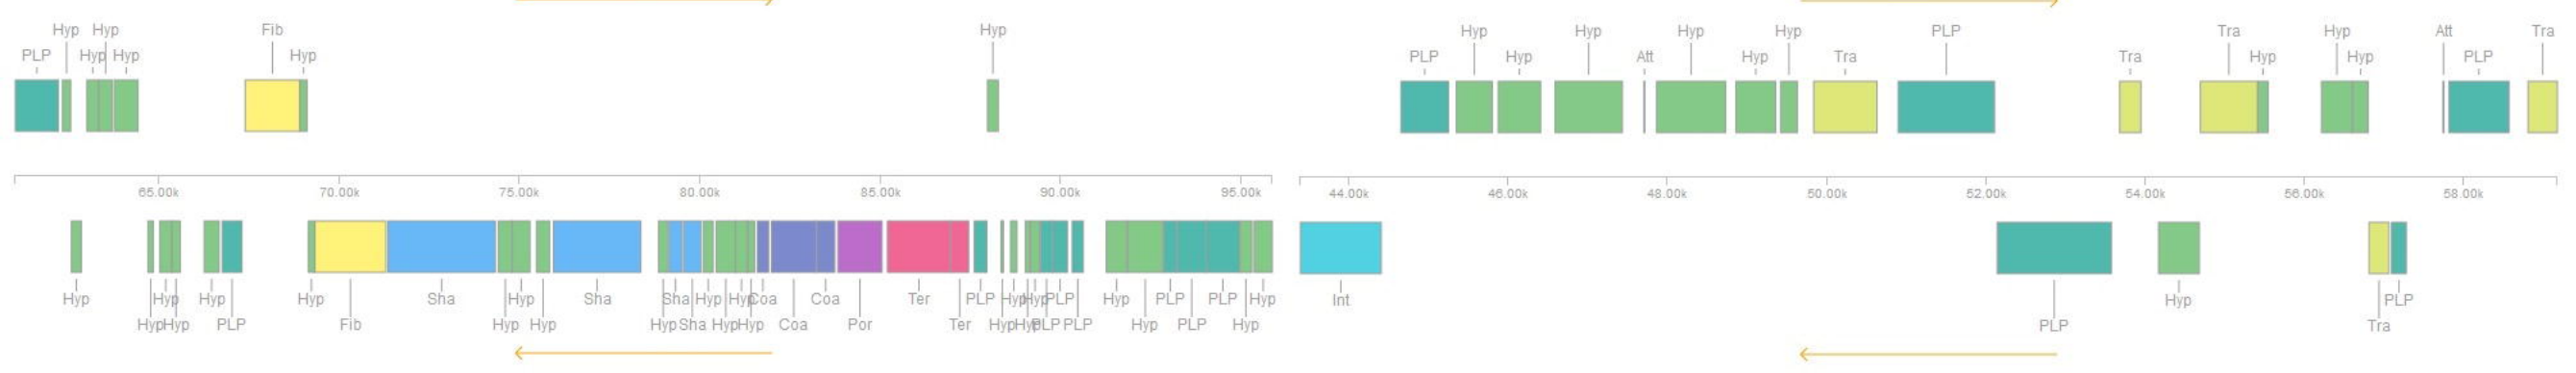

**Region 8**

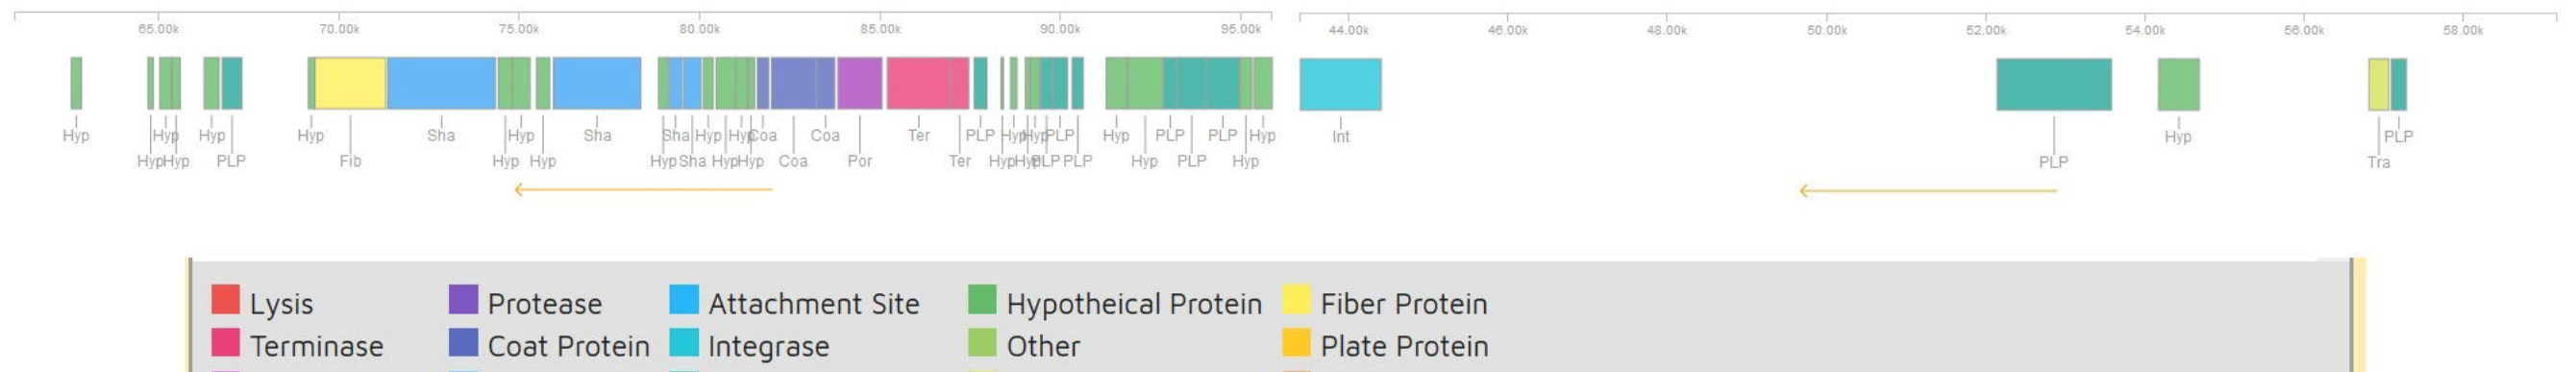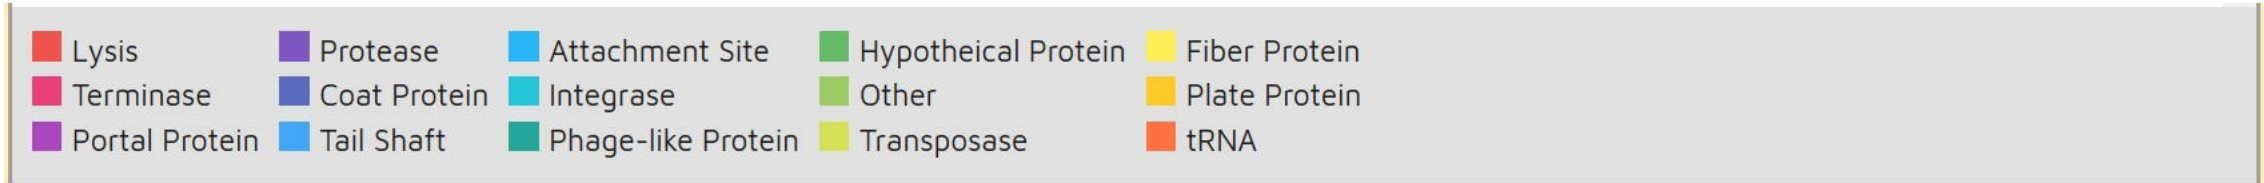

# KP32 contigs

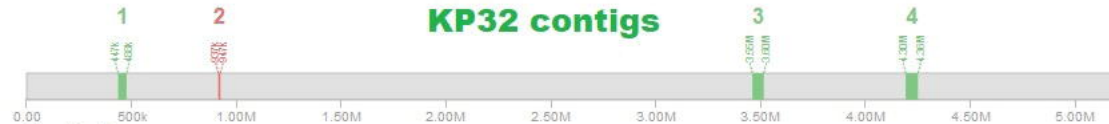

Contig\_1

56 7

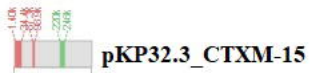

Contig\_3

8

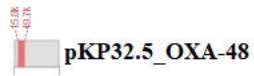

Contig\_5

- Intact (score > 90)
- Questionable (score 70-90)
- Incomplete (score < 70)

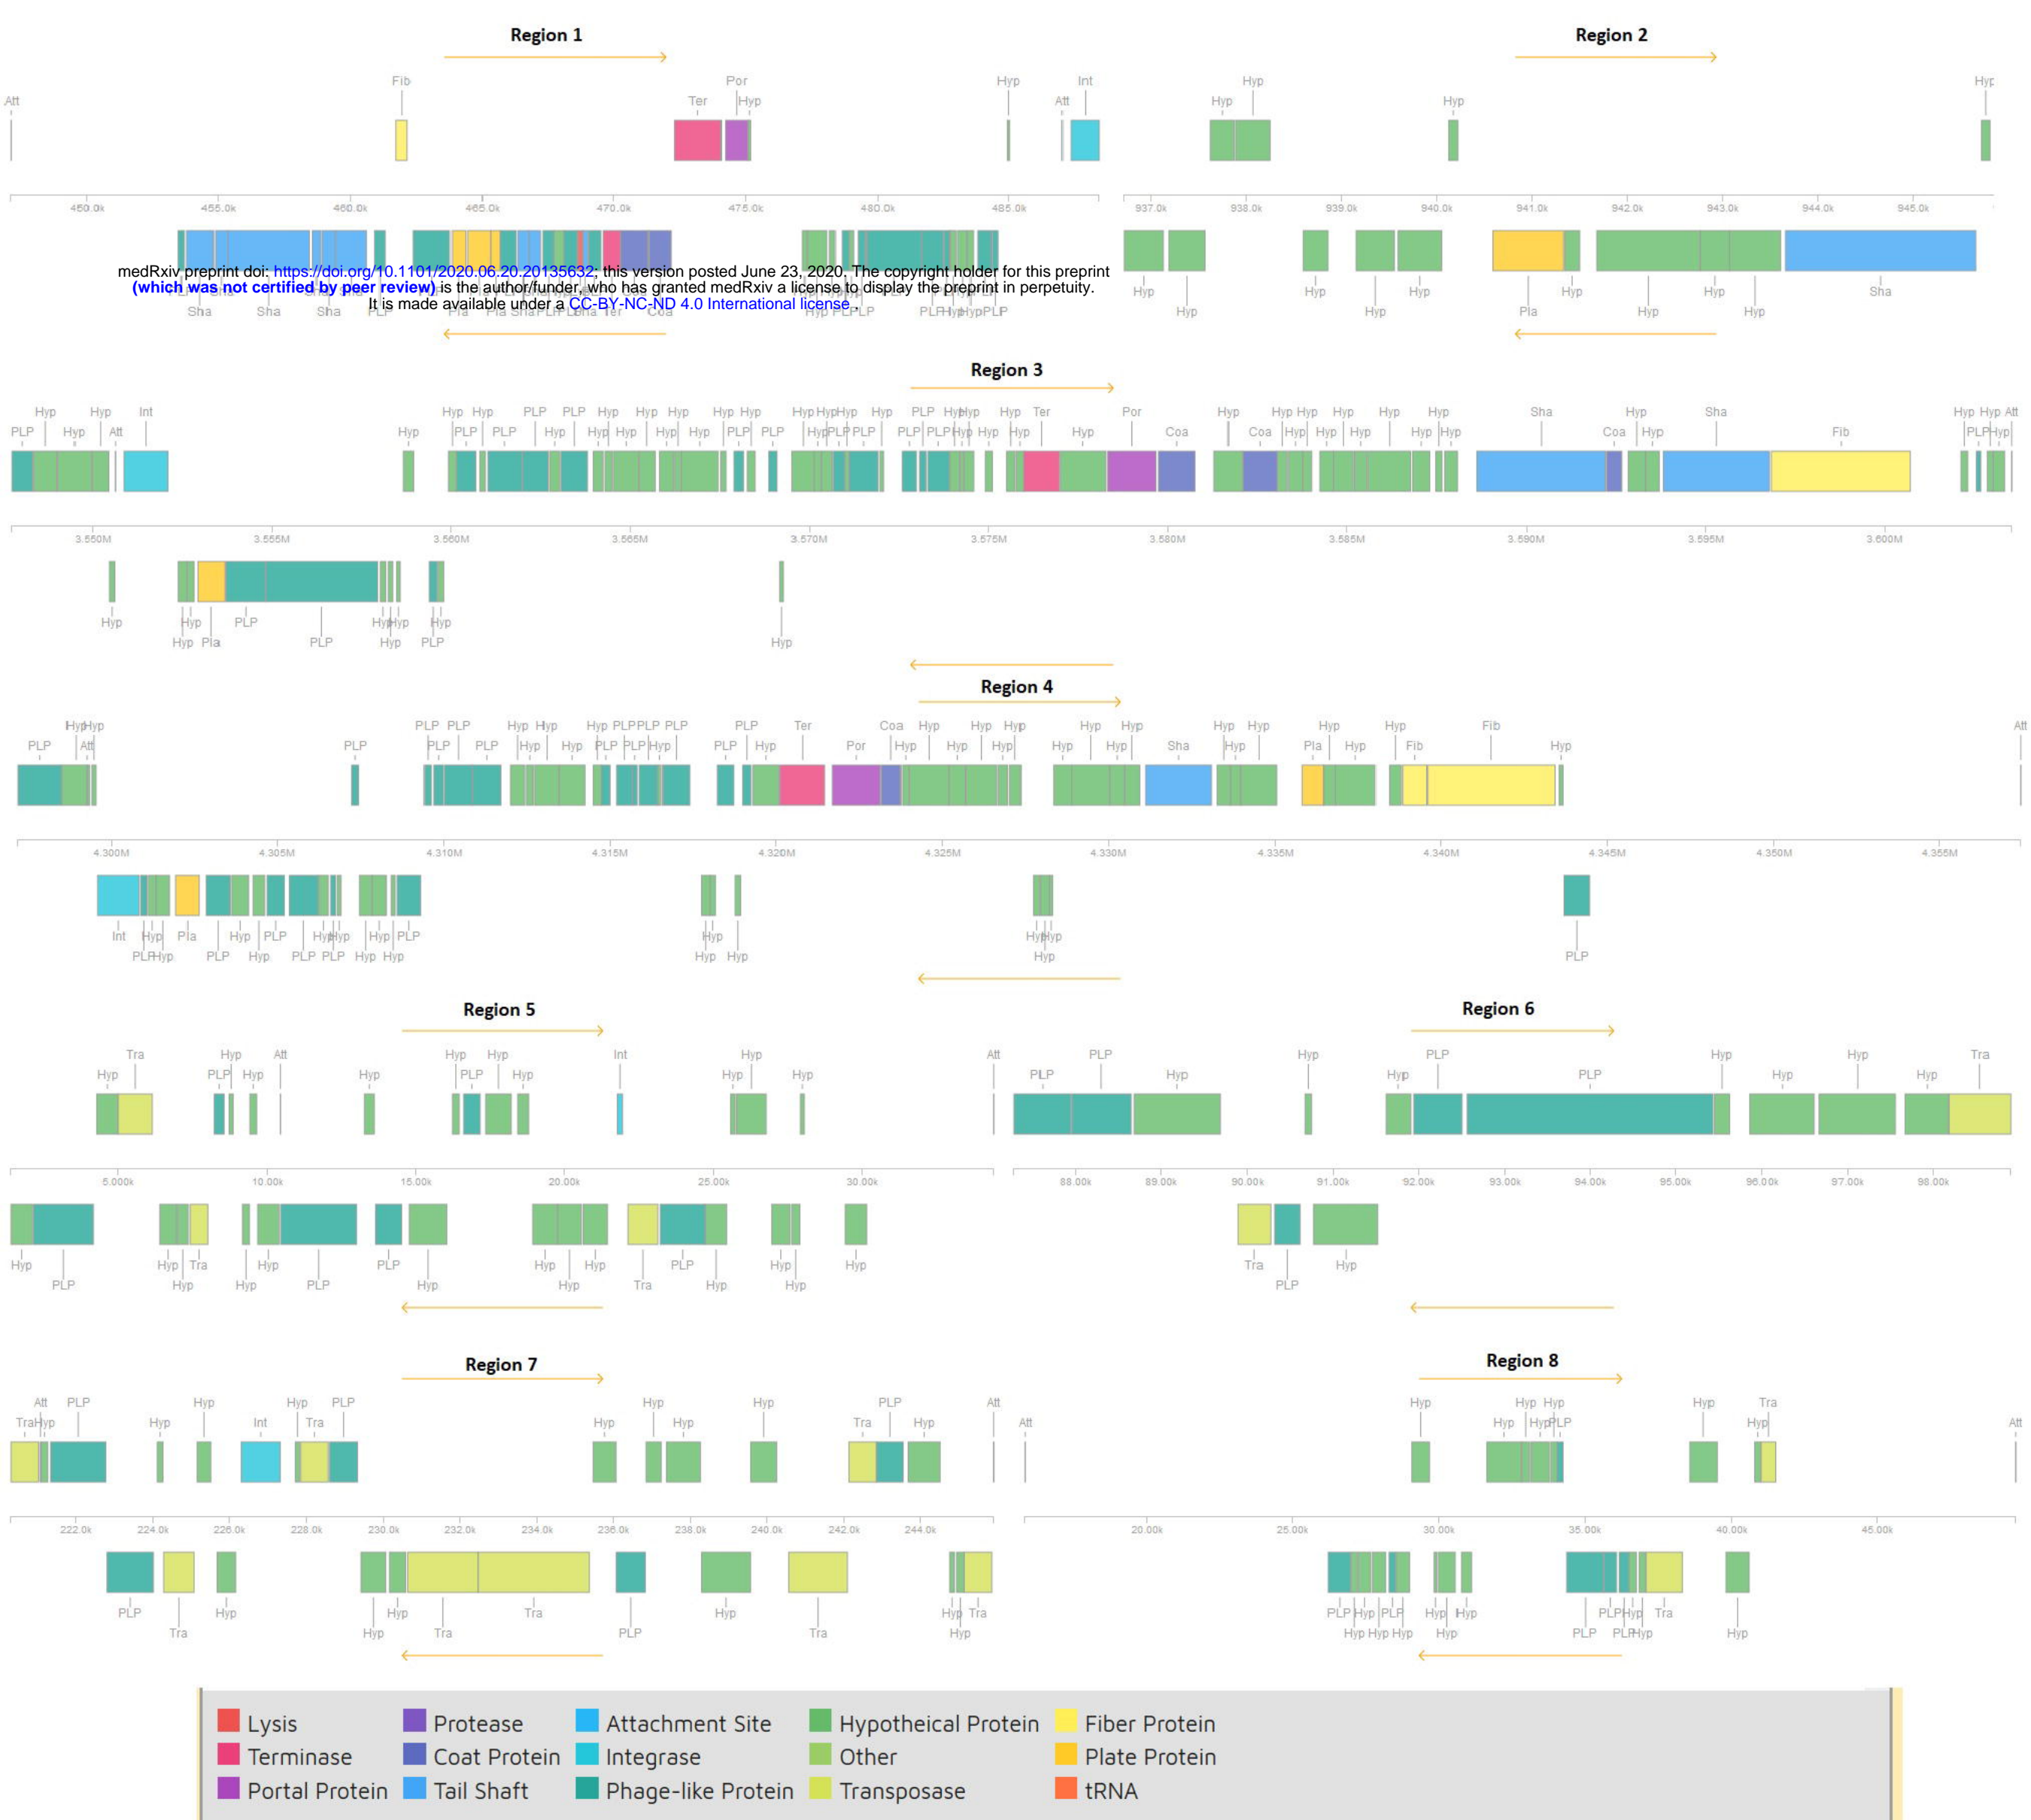

# KP33 contigs

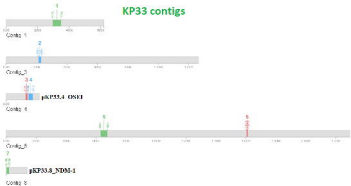

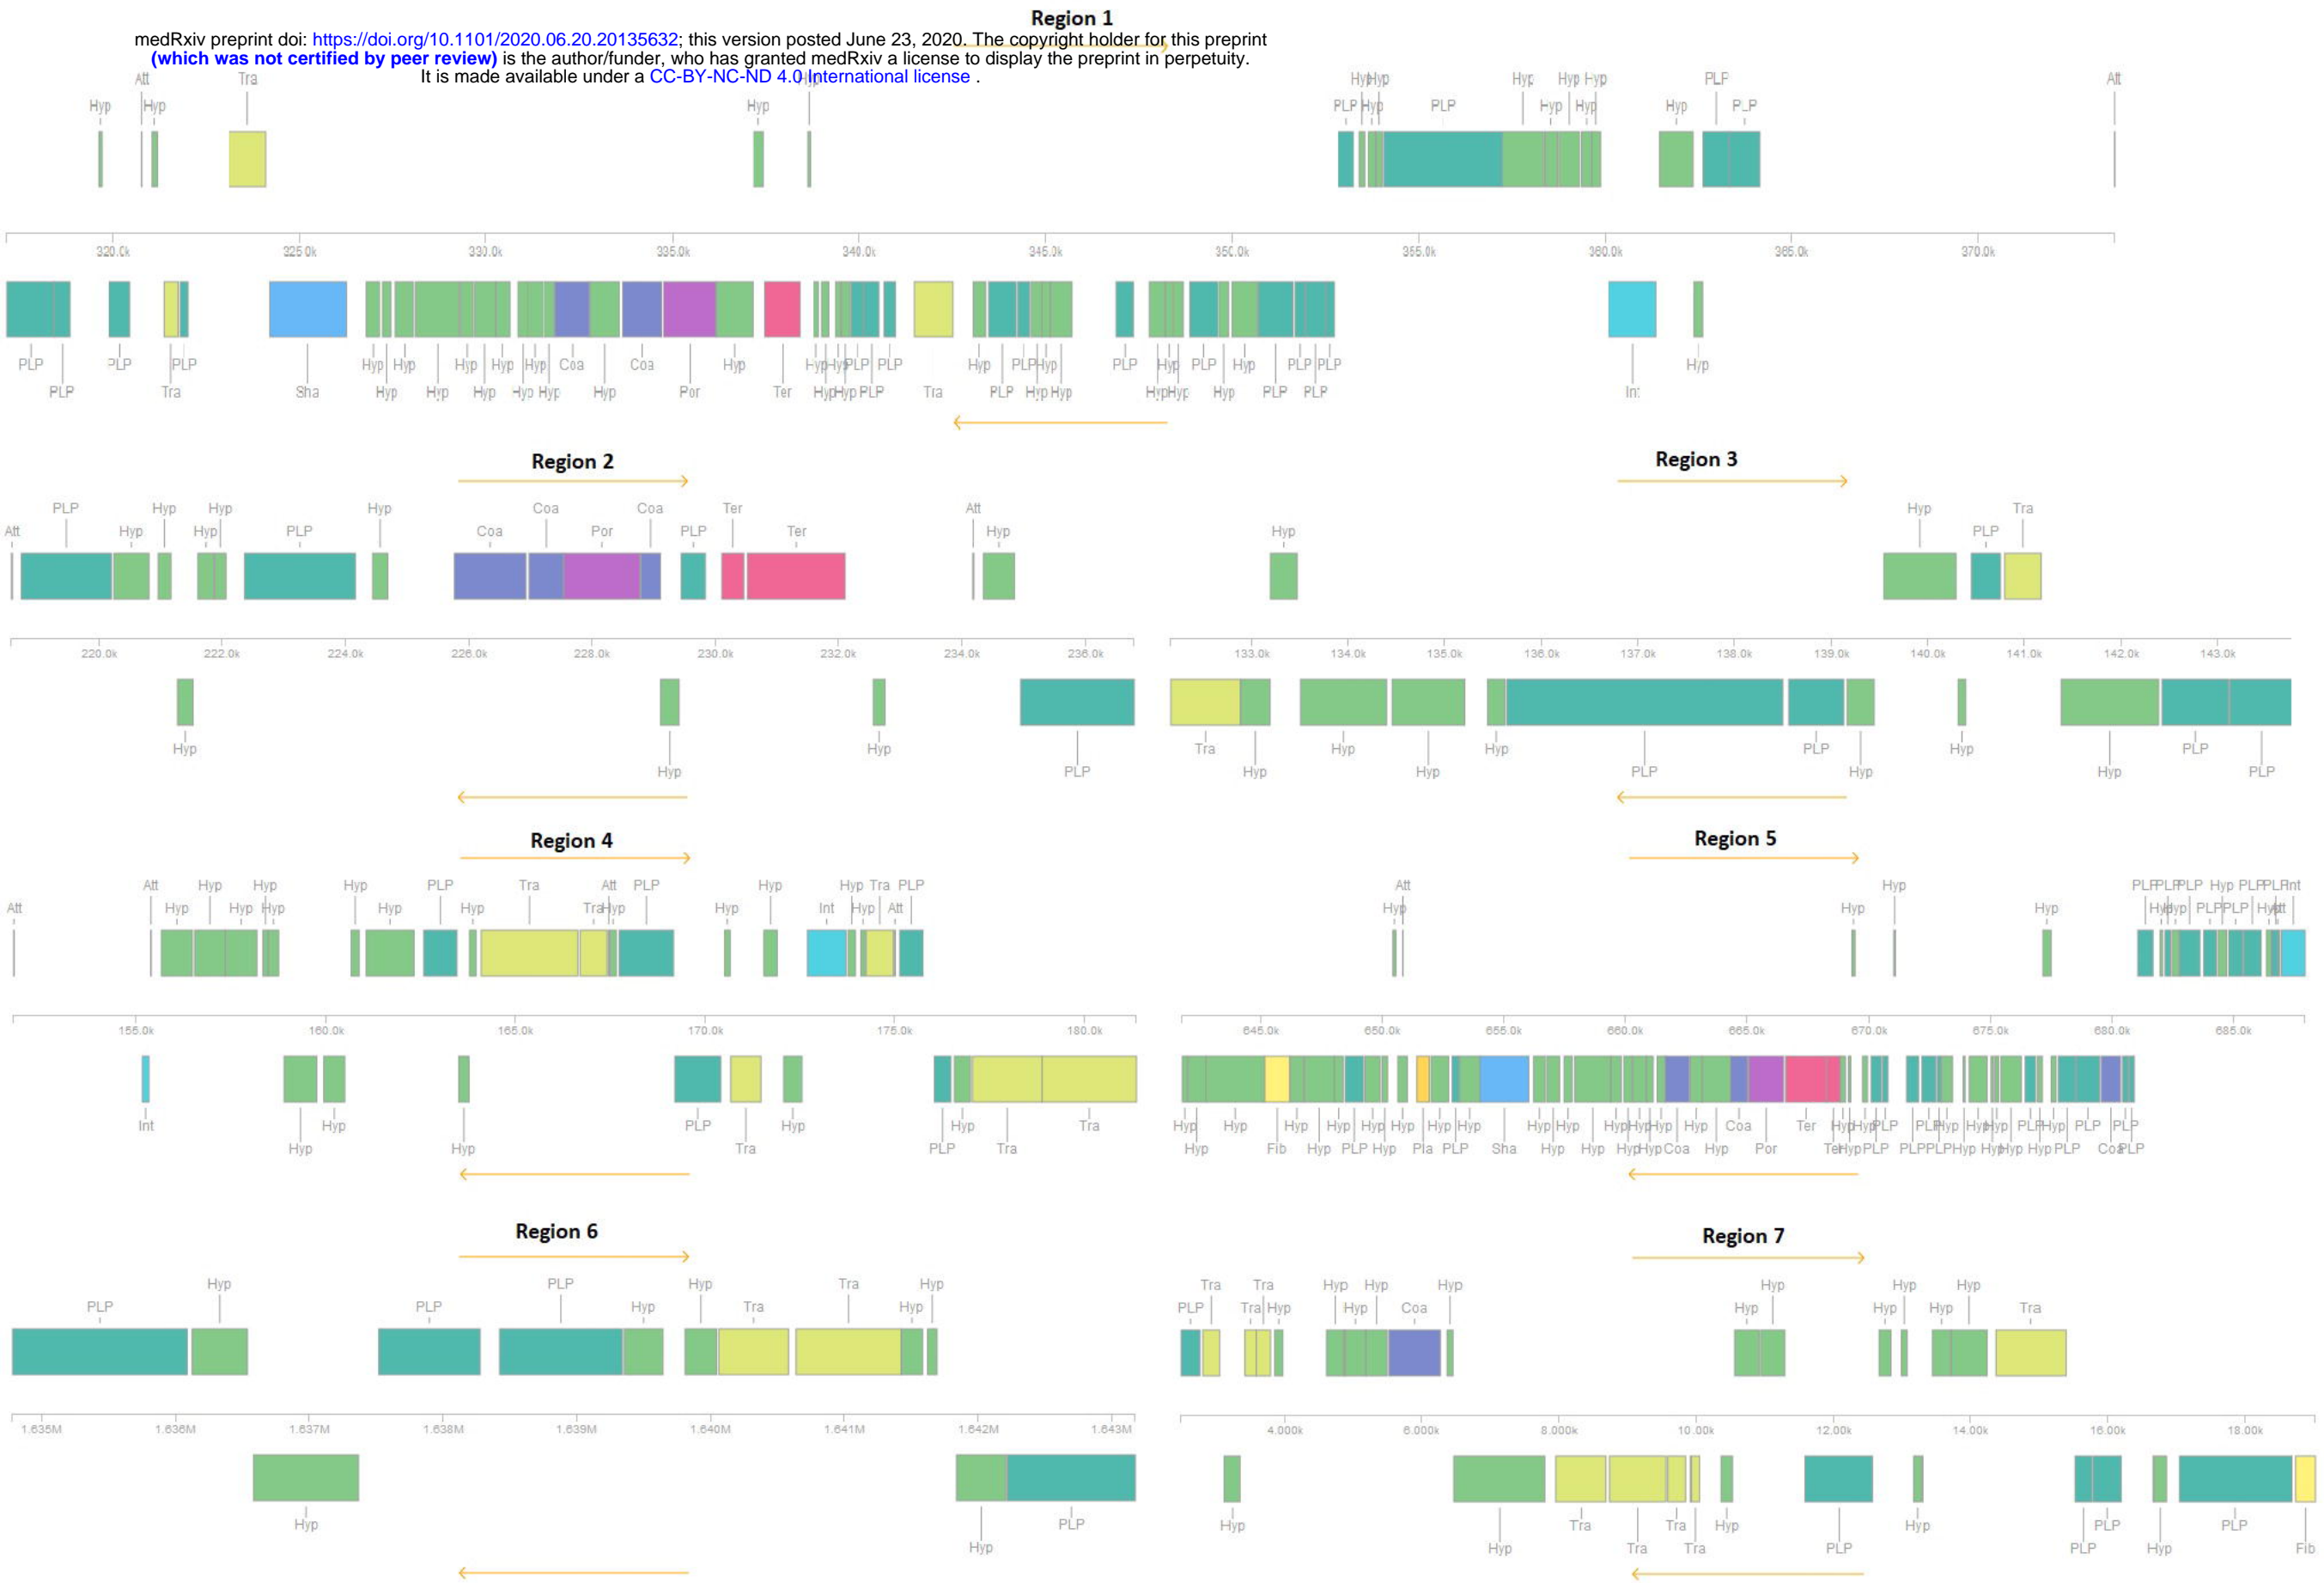

|                                                      |                                                     |                                                        |                                                           |                                                     |
|------------------------------------------------------|-----------------------------------------------------|--------------------------------------------------------|-----------------------------------------------------------|-----------------------------------------------------|
| <span style="color: red;">■</span> Lysis             | <span style="color: purple;">■</span> Protease      | <span style="color: cyan;">■</span> Attachment Site    | <span style="color: green;">■</span> Hypothetical Protein | <span style="color: yellow;">■</span> Fiber Protein |
| <span style="color: pink;">■</span> Terminase        | <span style="color: blue;">■</span> Coat Protein    | <span style="color: cyan;">■</span> Integrase          | <span style="color: lightgreen;">■</span> Other           | <span style="color: orange;">■</span> Plate Protein |
| <span style="color: purple;">■</span> Portal Protein | <span style="color: lightblue;">■</span> Tail Shaft | <span style="color: teal;">■</span> Phage-like Protein | <span style="color: lightyellow;">■</span> Transposase    | <span style="color: red;">■</span> tRNA             |



13.1

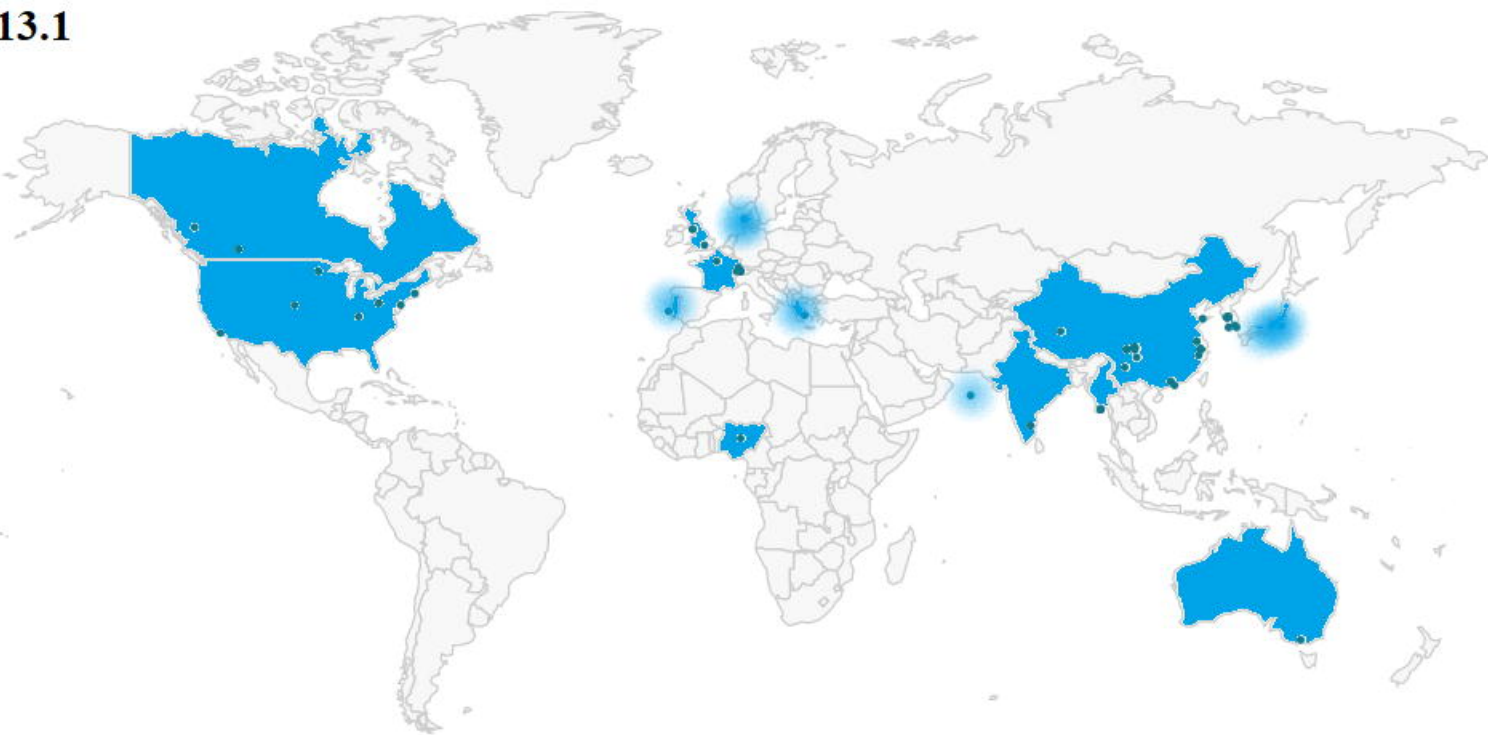

13.2

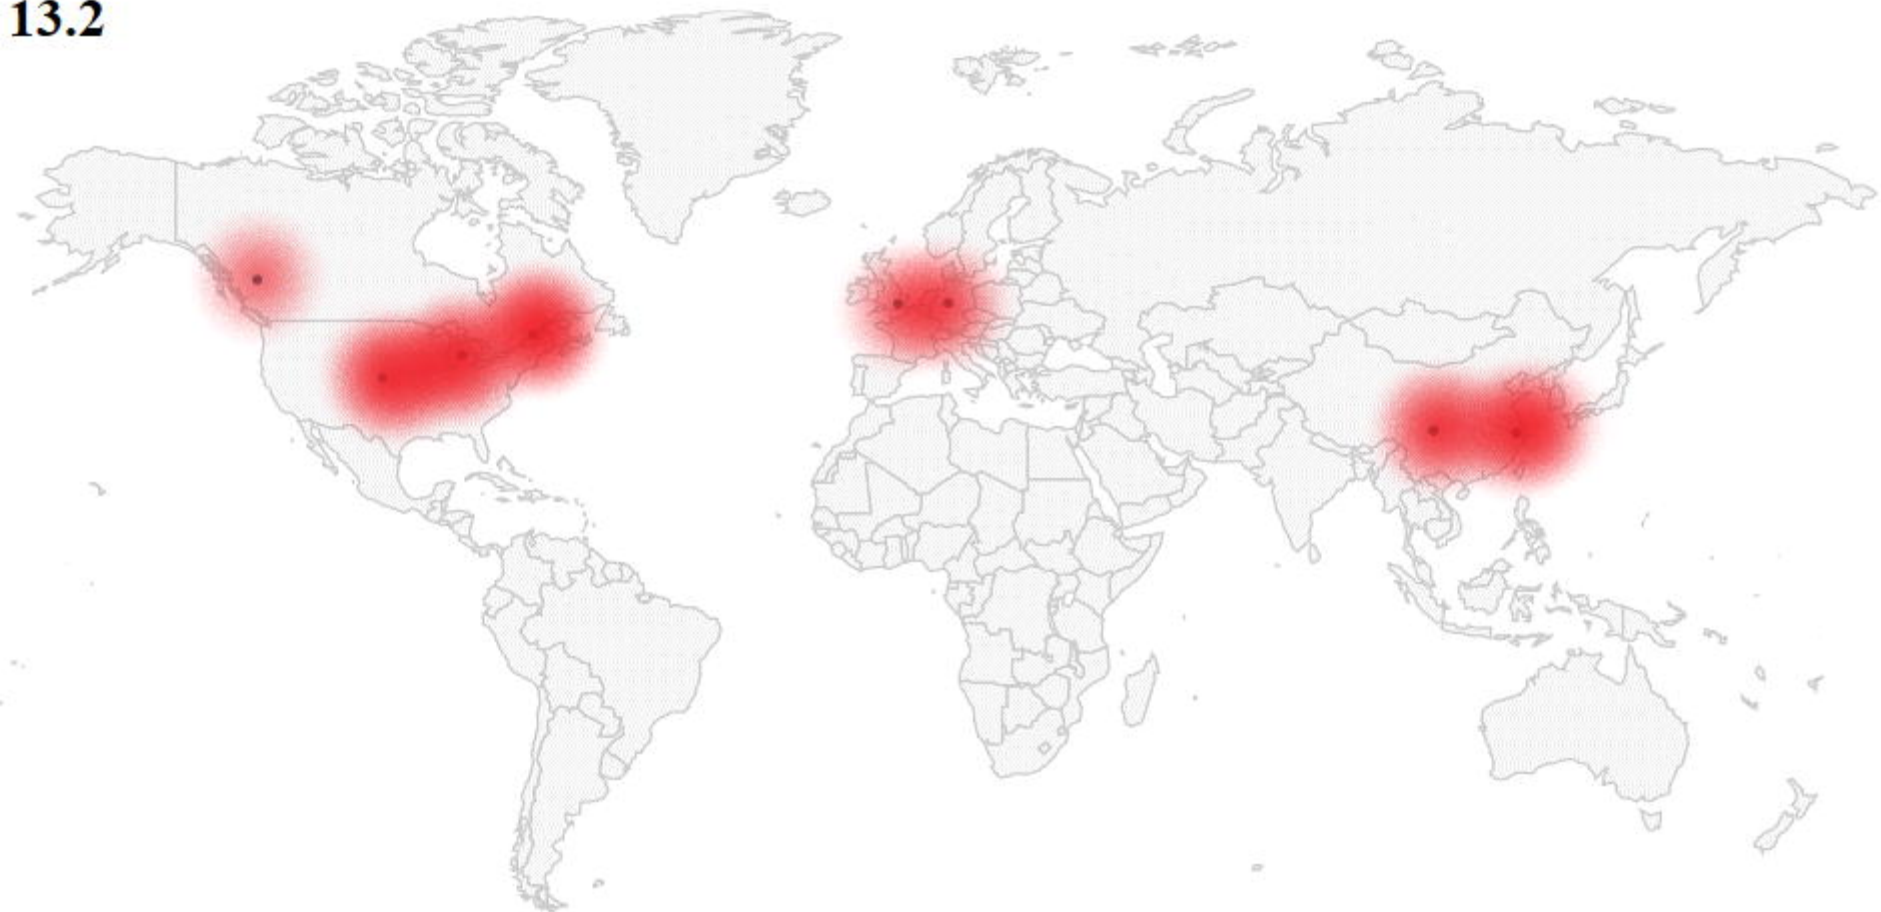

13.3

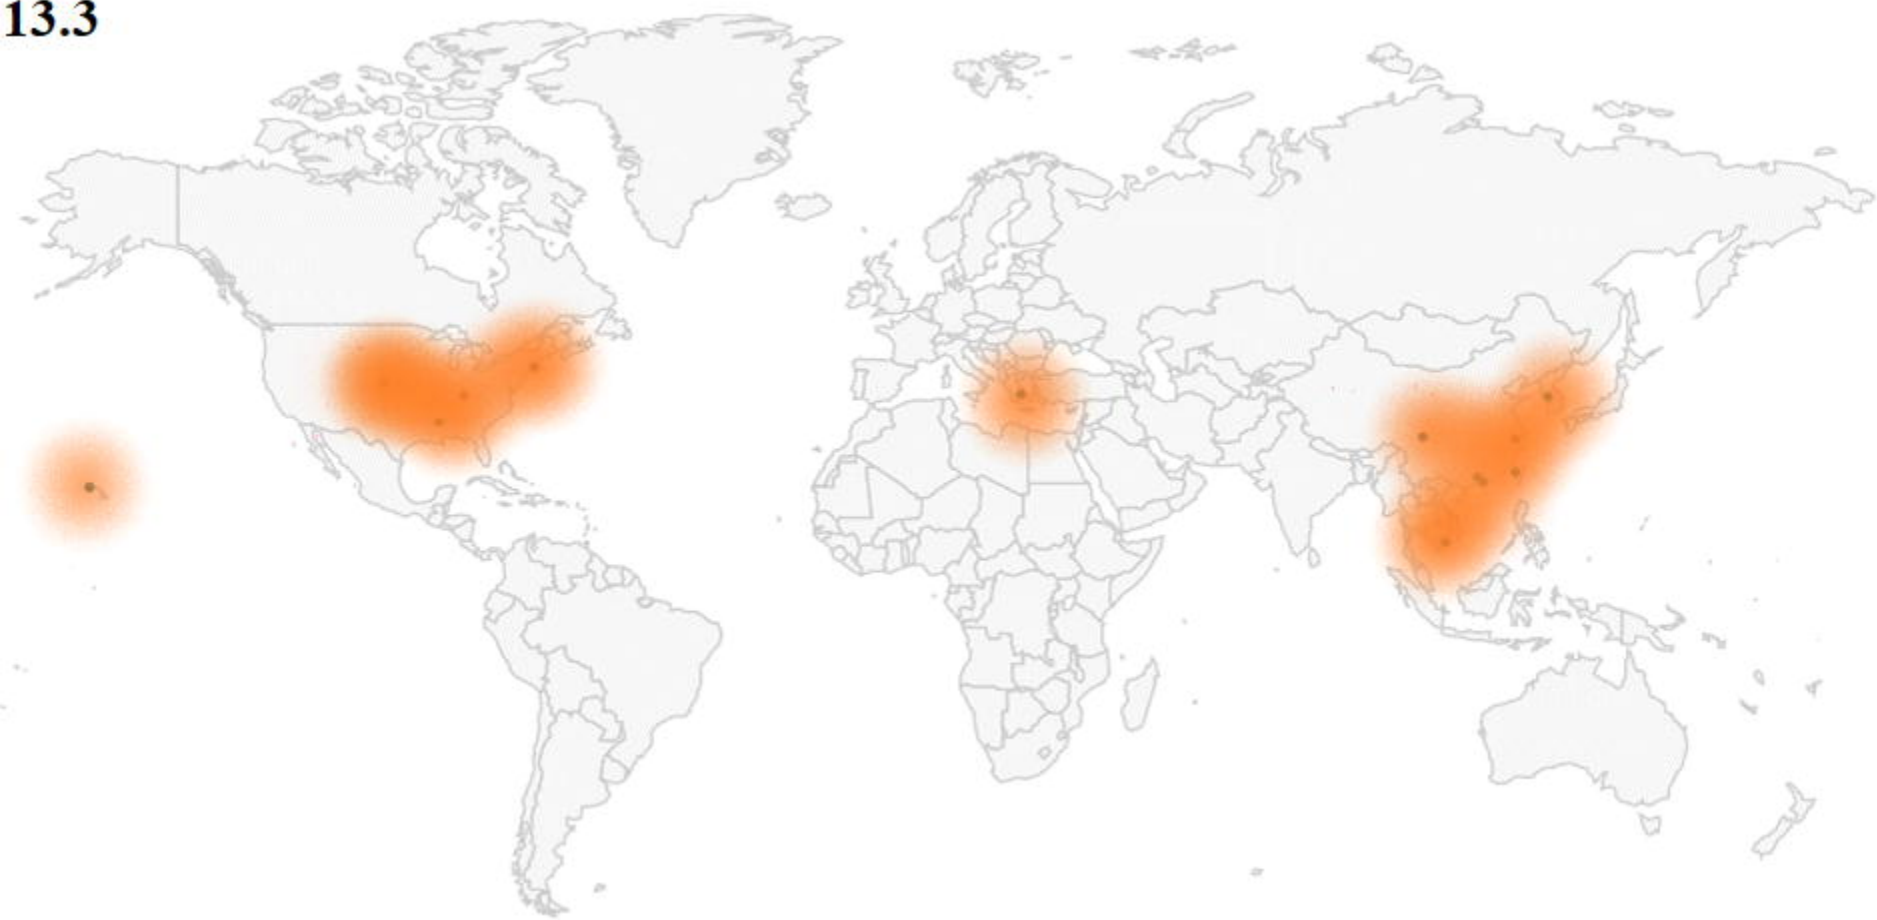

13.4

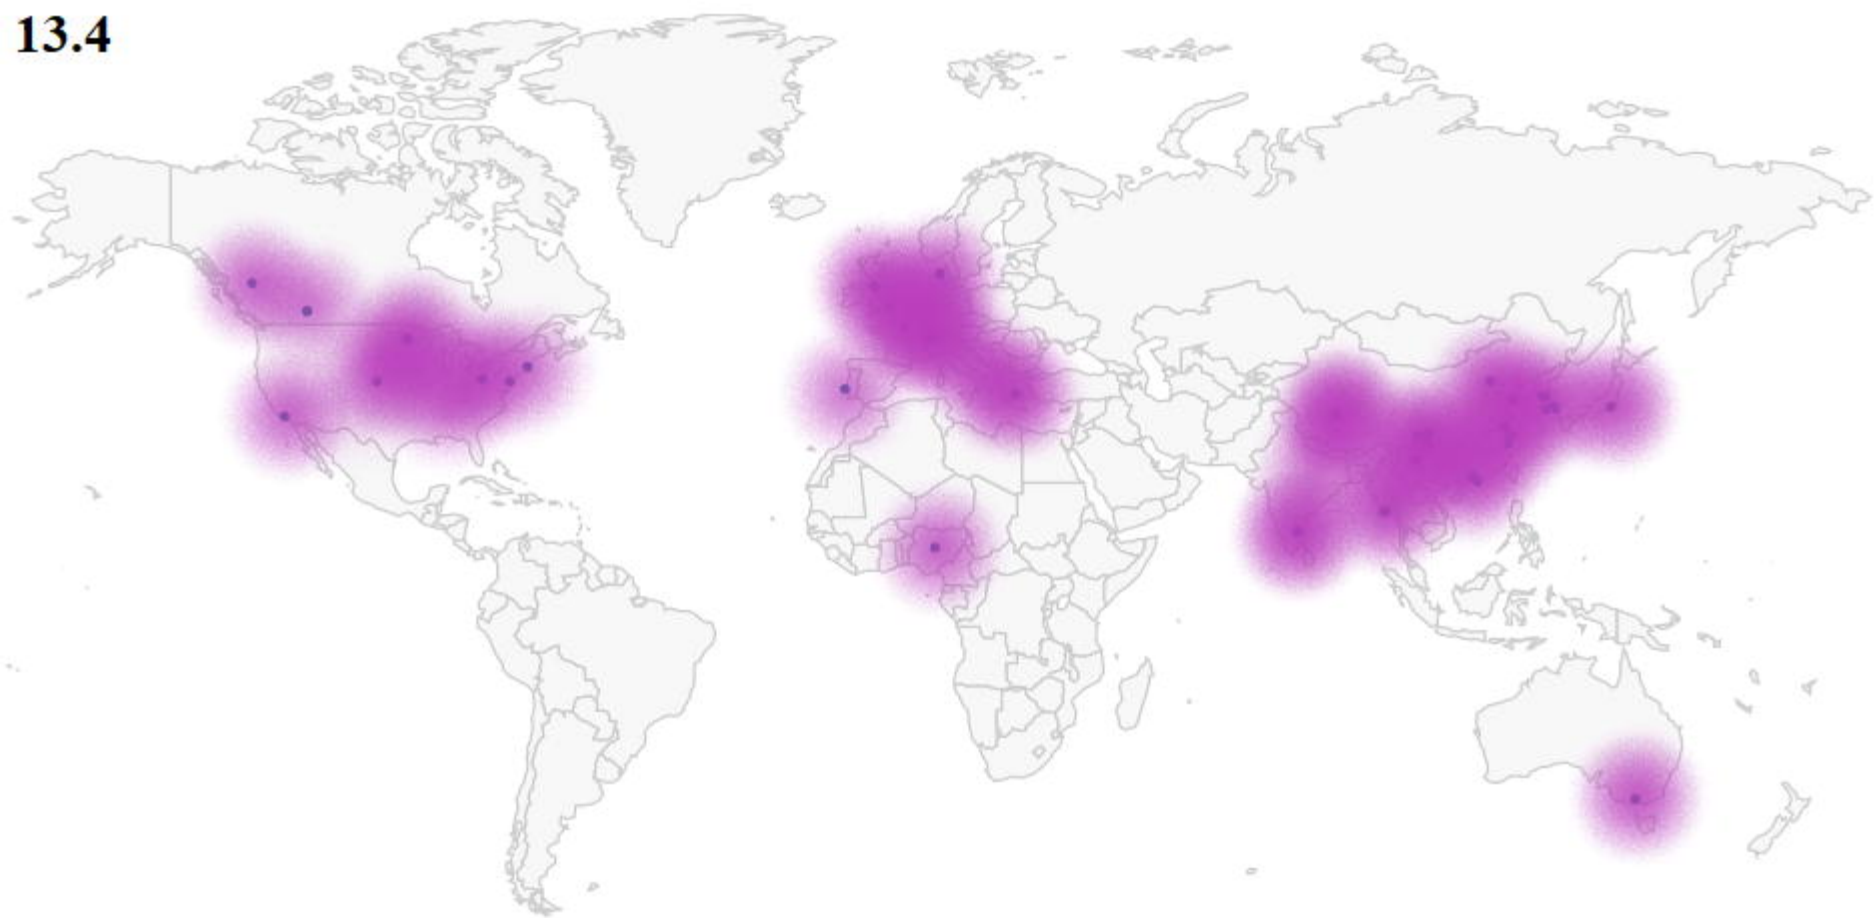

13.5

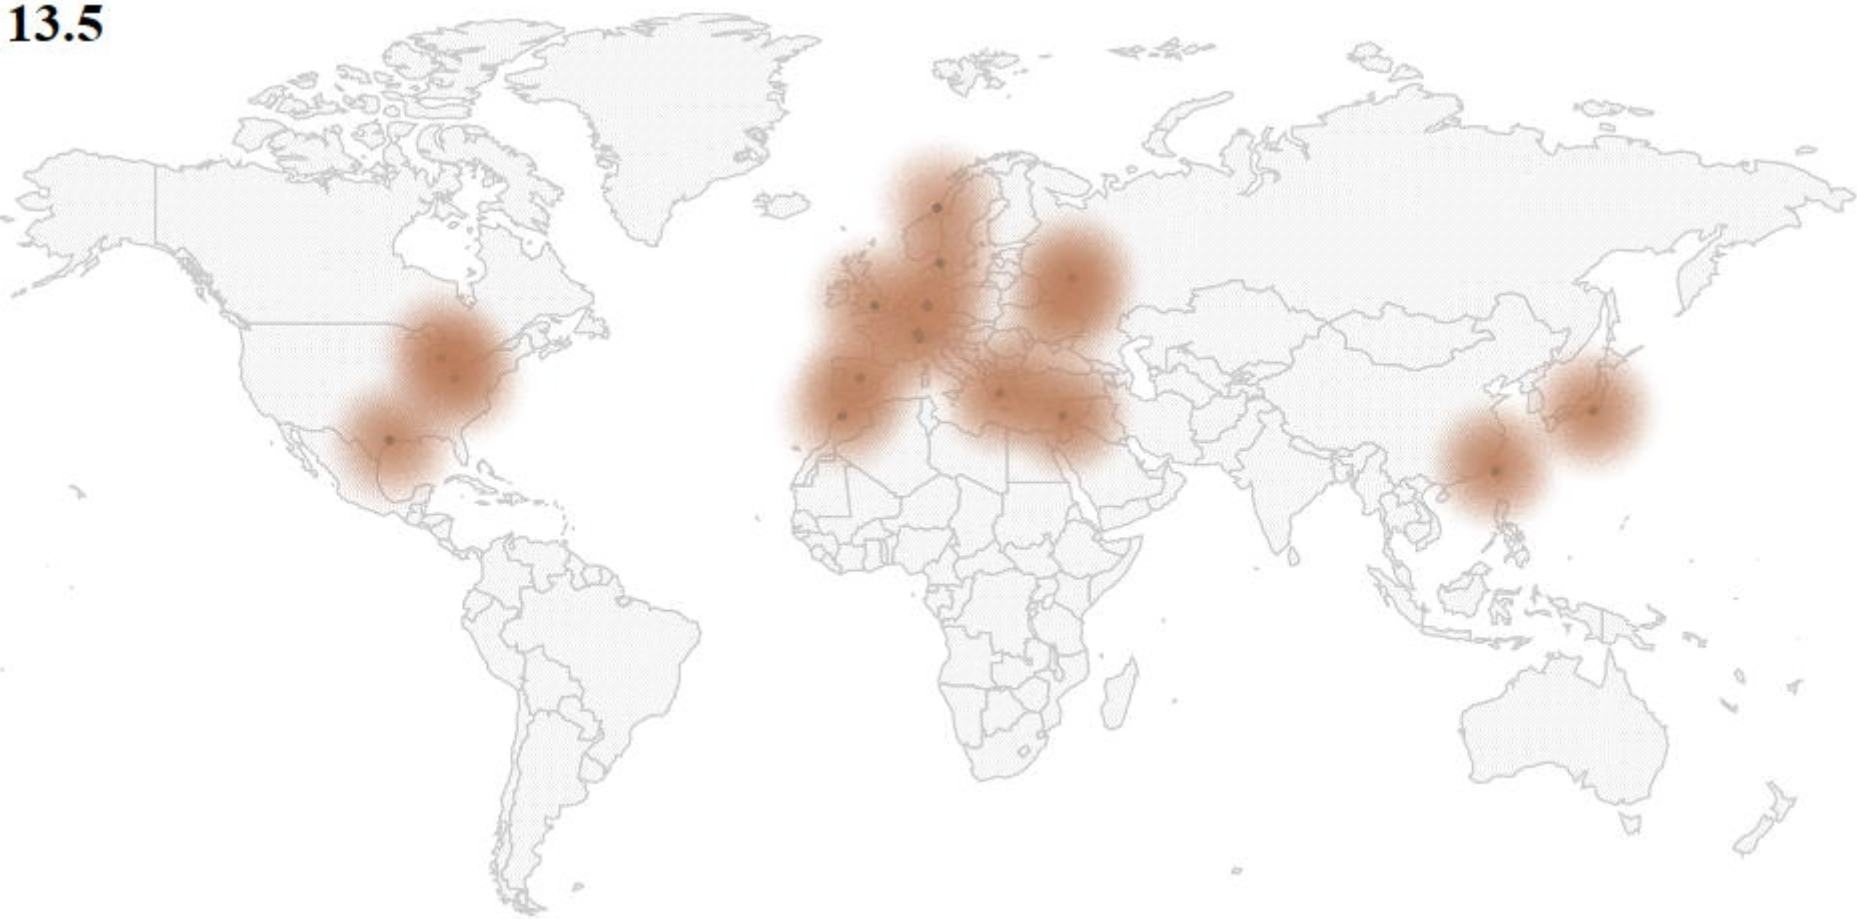

13.6

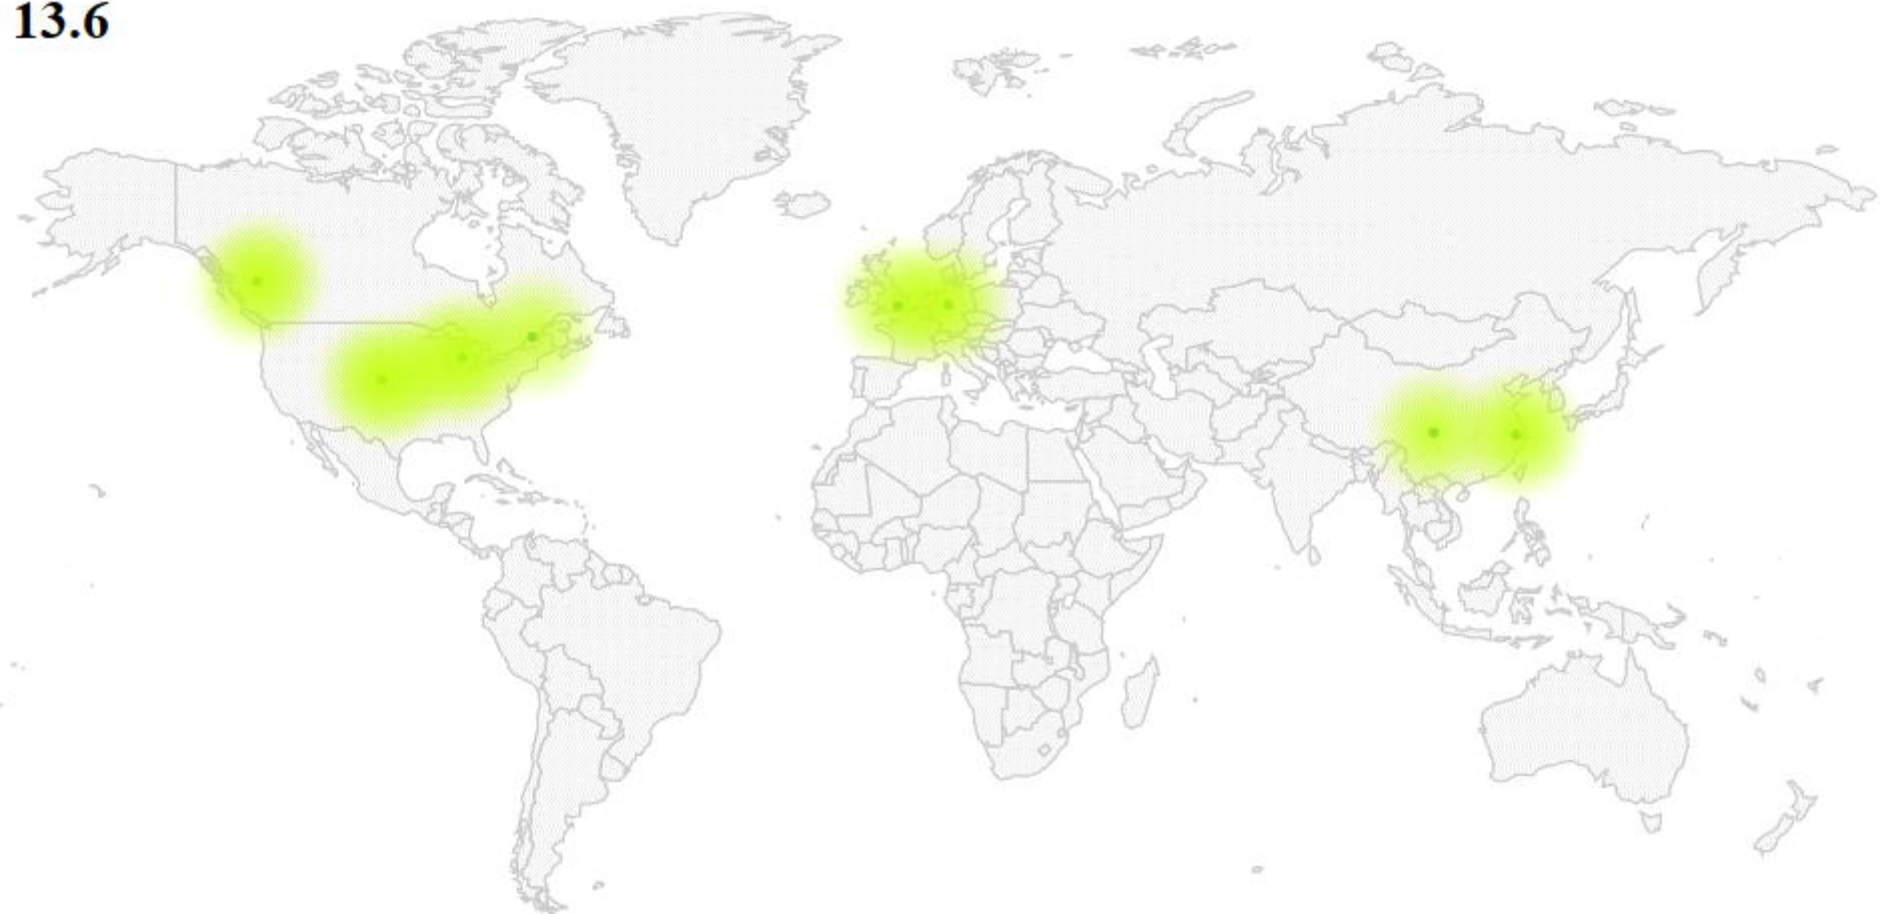

## K. pneumoniae virulence factor frequency

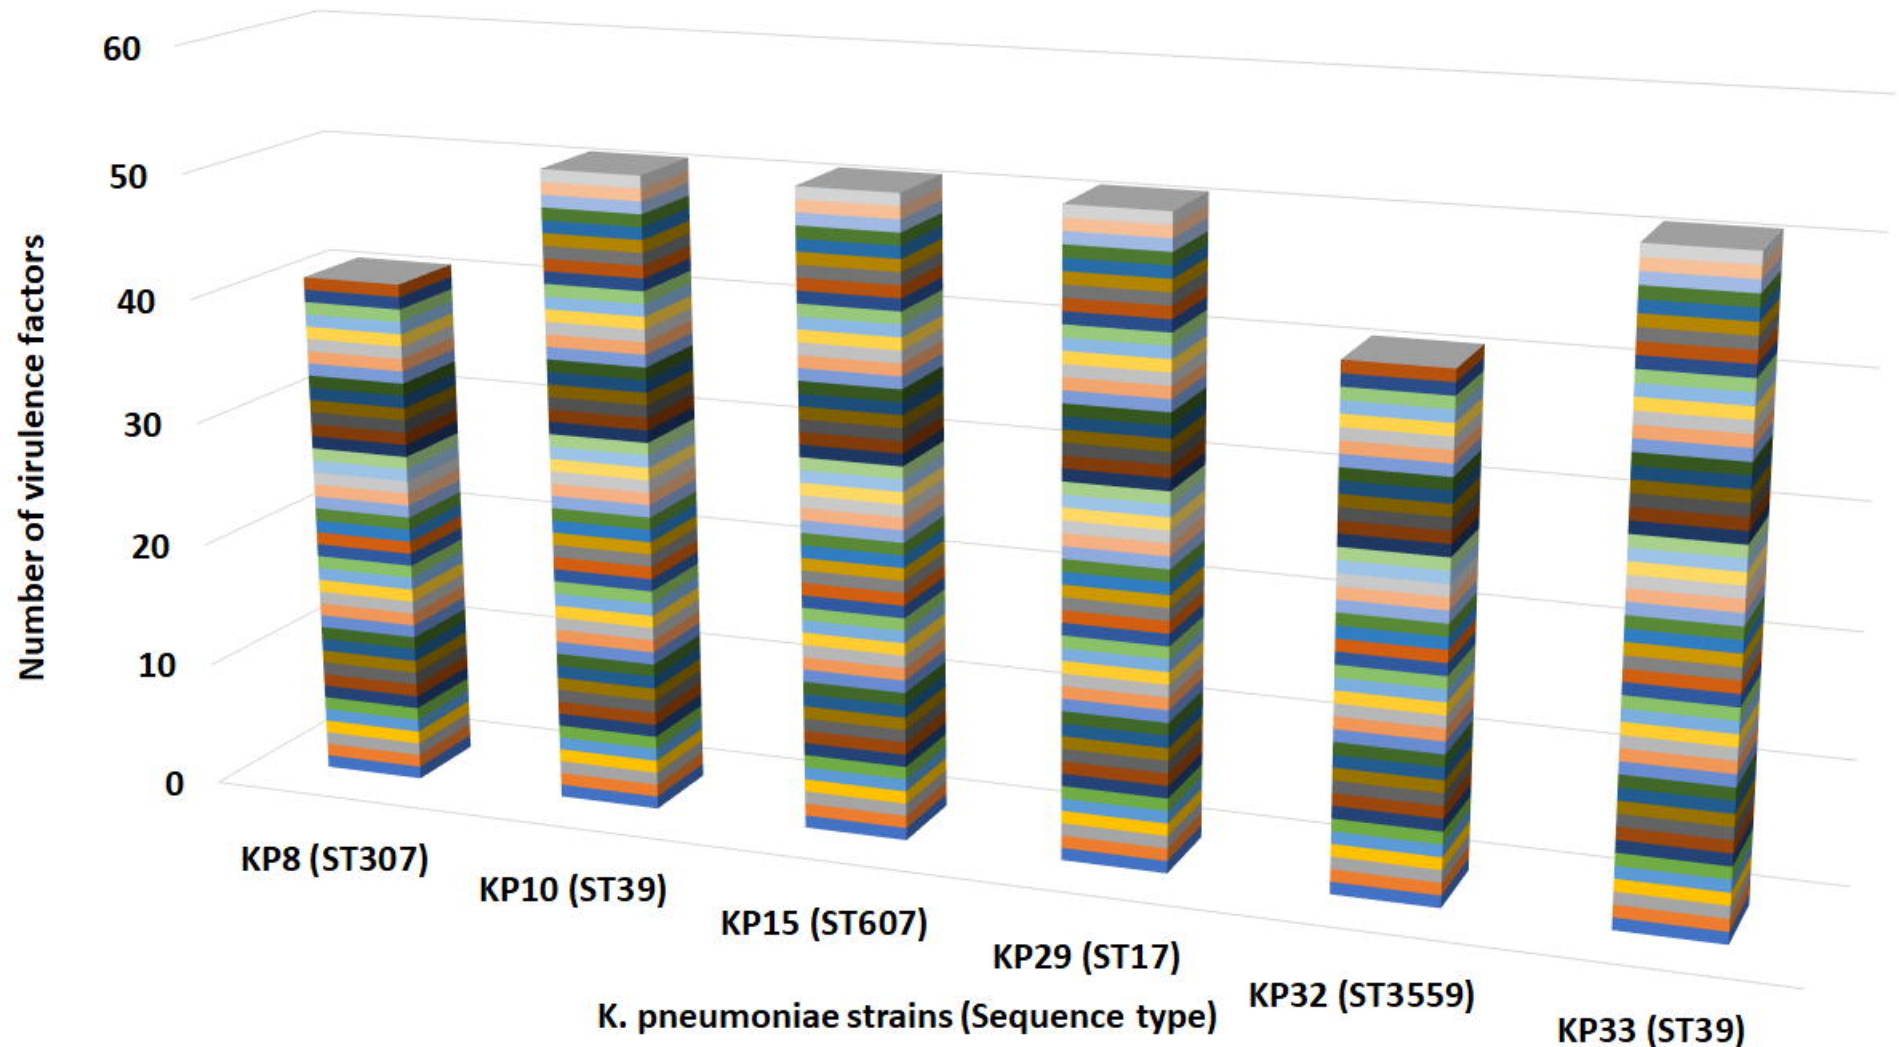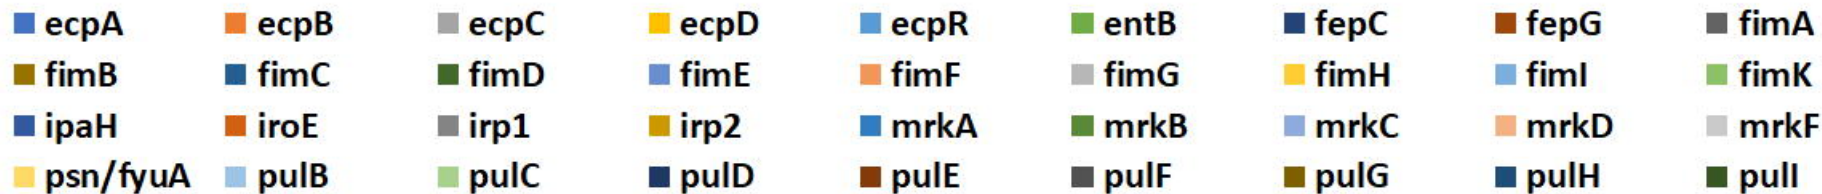

### Virulence factor-specimen association

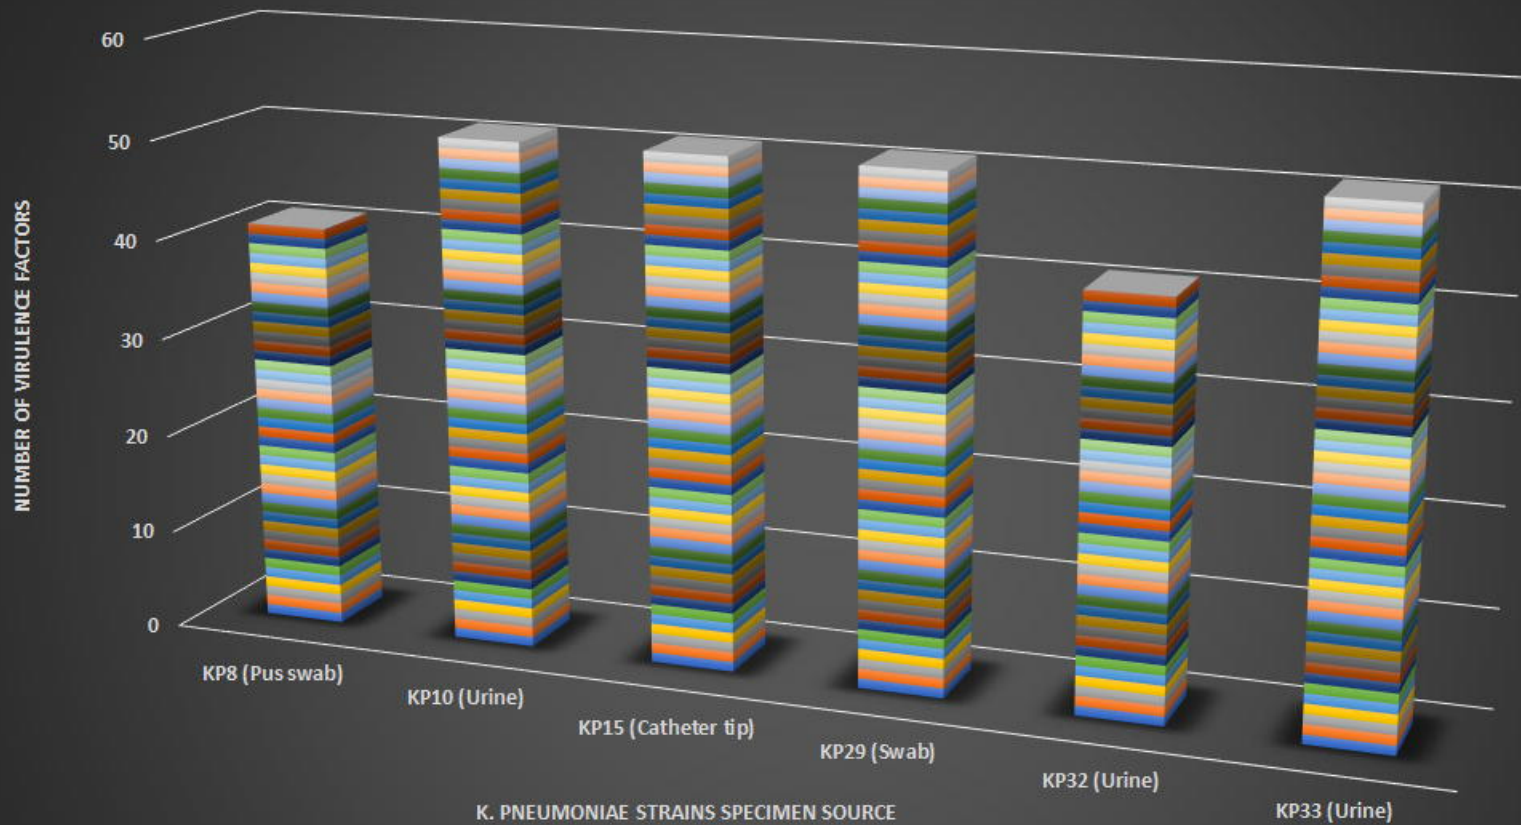

- K. PNEUMONIAE STRAINS SPECIMEN SOURCE
- |        |            |        |        |        |        |        |        |        |        |        |        |        |
|--------|------------|--------|--------|--------|--------|--------|--------|--------|--------|--------|--------|--------|
| ■ ecpA | ■ ecpB     | ■ ecpC | ■ ecpD | ■ ecpR | ■ entB | ■ fepC | ■ fepG | ■ fimA | ■ fimB | ■ fimC | ■ fimD | ■ fimE |
| ■ fimF | ■ fimG     | ■ fimH | ■ fimI | ■ fimK | ■ ipaH | ■ iroE | ■ irp1 | ■ irp2 | ■ mrkA | ■ mrkB | ■ mrkC | ■ mrkD |
| ■ mrkF | ■ psn/fyuA | ■ pulB | ■ pulC | ■ pulD | ■ pulE | ■ pulF | ■ pulG | ■ pulH | ■ pulI | ■ pulJ | ■ pulK | ■ pulL |
| ■ pulM | ■ pulN     | ■ pulO | ■ pulS | ■ rpoS | ■ ybtA | ■ ybtE | ■ ybtP | ■ ybtQ | ■ ybtS | ■ ybtT | ■ ybtU |        |



## KL102 reference ⓘ:

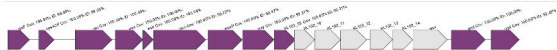

Other genes found in locus ⓘ: 0 ▾

Other genes found outside locus ⓘ: 2 ▾

Allelic type ⓘ:

wzi: 939 wzl: 173

Assembly pieces ⓘ:

[Download as FASTA](#)

KL102 reference size ⓘ: 21217

Length discrepancy ⓘ: n/a

| Contig name | Start position | End position | Length |
|-------------|----------------|--------------|--------|
| Contig_5    | 3825862        | 3838302      | 12441  |
| Contig_11   | 2              | 3891         | 3890   |

## O2v2 reference ⓘ:

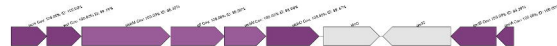

Other genes found in locus ⓘ: 0 ▾

Other genes found outside locus ⓘ: 0 ▾

Assembly pieces ⓘ:

[Download as FASTA](#)

O2v2 reference size ⓘ: 10812

Length discrepancy ⓘ: n/a

| Contig name | Start position | End position | Length |
|-------------|----------------|--------------|--------|
| Contig_11   | 6927           | 14325        | 7399   |
| Contig_3    | 1              | 2850         | 2850   |

## KL2 reference ⓘ:

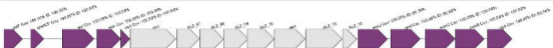

Other genes found in locus ⓘ: 0 ▼

Other genes found outside locus ⓘ: 2 ▼

## Allelic type ⓘ:

wzi: Not found wzi: 2

## Assembly pieces ⓘ:

[Download as FASTA](#)

KL2 reference size ⓘ: 24267

Length discrepancy ⓘ: n/a

| Contig name | Start position | End position | Length |
|-------------|----------------|--------------|--------|
| Contig_2    | 774908         | 782598       | 7691   |
| Contig_3    | 1258500        | 1265243      | 6744   |

## O1v1 reference ⓘ:

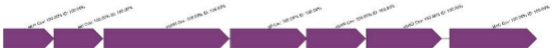

Other genes found in locus ⓘ: 0 ▼

Other genes found outside locus ⓘ: 4 ▼

## Assembly pieces ⓘ:

[Download as FASTA](#)

O1v1 reference size ⓘ: 8064

Length discrepancy ⓘ: 0 bp

| Contig name | Start position | End position | Length |
|-------------|----------------|--------------|--------|
| Contig_2    | 763548         | 771611       | 8064   |

KL25 reference ⓘ:

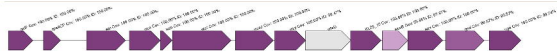

Other genes found in locus ⓘ: 0   Other genes found outside locus ⓘ: 2

Allelic type ⓘ:   wgz: 26   wsl: 133

Assembly pieces ⓘ:   [Download as FASTA](#)

KL25 reference size ⓘ: 18881

| Contig name | Start position | End position | Length |
|-------------|----------------|--------------|--------|
| Contig_2    | 288170         | 307053       | 18884  |

Length discrepancy ⓘ: +3 bp

O1v1 reference ⓘ:

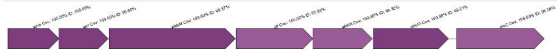

Other genes found in locus ⓘ: 0   Other genes found outside locus ⓘ: 2

Assembly pieces ⓘ:   [Download as FASTA](#)

O1v1 reference size ⓘ: 8064

| Contig name | Start position | End position | Length |
|-------------|----------------|--------------|--------|
| Contig_2    | 275960         | 284021       | 8062   |

Length discrepancy ⓘ: -2 bp

## KL25 reference:

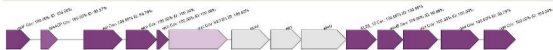

Other genes found in locus: 0

Other genes found outside locus: 3

Allelic type:

wzi: 28 wzc: 141

Assembly pieces:

[Download as FASTA](#)

KL25 reference size: 18881

Length discrepancy: n/a

| Contig name | Start position | End position | Length |
|-------------|----------------|--------------|--------|
| Contig_4    | 487504         | 505058       | 7555   |
| Contig_6    | 3332025        | 3340094      | 8070   |

## O5 reference:

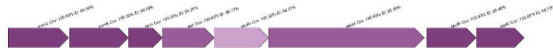

Other genes found in locus: 0

Other genes found outside locus: 0

Assembly pieces:

[Download as FASTA](#)

O5 reference size: 12084

Length discrepancy: 0 bp

| Contig name | Start position | End position | Length |
|-------------|----------------|--------------|--------|
| Contig_4    | 482391         | 494474       | 12084  |

KL27 reference **i**: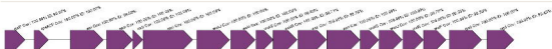Other genes found in locus **i**: 0Other genes found outside locus **i**: 1Allelo type **i**:

wzi: 28 wzi: 187

Assembly pieces **i**:[Download as FASTA](#)KL27 reference size **i**: 22251

| Contig name | Start position | End position | Length |
|-------------|----------------|--------------|--------|
| Contig_1    | 4038684        | 4060933      | 22250  |

Length discrepancy **i**: -1 bpO4 reference **i**: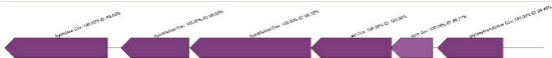Other genes found in locus **i**: 0Other genes found outside locus **i**: 0Assembly pieces **i**:[Download as FASTA](#)O4 reference size **i**: 9449

| Contig name | Start position | End position | Length |
|-------------|----------------|--------------|--------|
| Contig_1    | 4063220        | 4072669      | 9450   |

Length discrepancy **i**: +1 bp

KP33

Best locus: KL2

Match confidence ⓘ: None

Cov ⓘ: 61.11%

ID ⓘ: 99.67%

Genes: 10 / 18

## KL2 reference ⓘ:

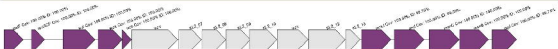

Other genes found in locus ⓘ: 0 ▾ Other genes found outside locus ⓘ: 2 ▾

## Allelic type ⓘ:

wzi: Not found wzi: 2

## Assembly pieces ⓘ:

[Download as FASTA](#)

KL2 reference size ⓘ: 24287

Length discrepancy ⓘ: n/a

| Contig name | Start position | End position | Length |
|-------------|----------------|--------------|--------|
| Contig_2    | 774608         | 782598       | 7991   |
| Contig_3    | 1258500        | 1265243      | 6744   |

KP33

Best locus: O1v1

Match confidence ⓘ: Very high

Cov ⓘ: 100.00%

ID ⓘ: 99.99%

Genes: 7 / 7

## O1v1 reference ⓘ:

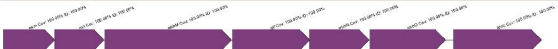

Other genes found in locus ⓘ: 0 ▾ Other genes found outside locus ⓘ: 4 ▾

## Assembly pieces ⓘ:

[Download as FASTA](#)

O1v1 reference size ⓘ: 8064

Length discrepancy ⓘ: 0 bp

| Contig name | Start position | End position | Length |
|-------------|----------------|--------------|--------|
| Contig_2    | 763548         | 771611       | 8064   |
